# Supplementary material for: The status of coral reef ecology research in the Red Sea
Source: Springer Nature journal article supplement (doi:10.1007/s00338-013-1055-8), 2013-06-20
Supplement: MOESM1 [file 338_2013_1055_MOESM1_ESM.xlsx]

## Sheet: Summary
	Red Sea		Great Barrier Reef	Caribbean	All		Search Terms:	"predatory fish*" OR shark*
	all	excluding Eilat/Aqaba
	40	15	85	206	2014

## Sheet: All
PT	AU	BA	CA	GP	BE	Z2	TI	Z1	FT	PN	AE	Z3	SO	SE	BS	VL	IS	SI	MA	BP	EP	AR	DI	D2	SU	PD	PY	AB	Z4	CT	CY	SP	CL	TC	Z8	ZB	Z9	SN	BN	UT
J	Lieske, Joel						American State Cultures: Testing a New Measure and Theory						PUBLIUS-THE JOURNAL OF FEDERALISM			42	1			108	133		10.1093/publius/pjr018			WIN 2012	2012	Lieske has recently developed a new measure of state culture that appears to be a much better predictor of state performance than other commonly used measures including per capita income, Sharkansky's index of Elazar's typology, and Hero's index of racial and ethnic diversity. Here, we show why uni- and multi-dimensional reductions of Elazar's and Lieske's typologies and other measures do not pre…						0			0	0048-5950		WOS:000297374900005
J	Kaiyaded, Woranut; Wimolmala, Ekachai; Harnnarongchai, Wanlop; Sitticharoen, Watcharin; Sombatsompop, Narongrit						Rotating die technique for sharkskin minimization in highly viscous wood/PP composite melt in an extrusion die						JOURNAL OF APPLIED POLYMER SCIENCE			125	3			2312	2321		10.1002/app.36446			AUG 5 2012	2012	This study used a newly developed rotating die system for purposes of reducing entrance pressure drop and sharkskin fracture for molten polypropylene (PP) and wood/polypropylene (WPP) composites in a single-screw extruder. The sharkskin fracture characteristics of the PP and WPP composite surfaces were examined quantitatively via roughness profiles and relaxation time evaluations, and qualitative…						0			0	0021-8995		WOS:000302902200075
J	Kittiphattanabawon, Phanat; Benjakul, Soottawat; Visessanguan, Wonnop; Shahidi, Fereidoon						Cryoprotective effect of gelatin hydrolysate from blacktip shark skin on surimi subjected to different freeze-thaw cycles						LWT-FOOD SCIENCE AND TECHNOLOGY			47	2			437	442		10.1016/j.lwt.2012.02.003			2012-07-01	2012	The cryoprotective effects of gelatin hydrolysate from blacktip shark (Carcharhinus limbatus) skin with different degrees of hydrolysis (DHs:5, 10, 20 and 30%) and commercial cryoprotectant (sucrose/sorbitol blend, 3:1) on surimi from threadfin bream (Nemipterus spp.) subjected to 3 and 6 freeze-thaw cycles were investigated. Ca2+-ATPase, total sulfhydryl group content and solubility of all natur…						0			0	0023-6438		WOS:000302852400031
J	Barnett, Adam; Semmens, Jayson M.						Sequential movement into coastal habitats and high spatial overlap of predator and prey suggest high predation pressure in protected areas						OIKOS			121	6			882	890					2012-06-01	2012	In theory, predators should attempt to match the distribution of their prey, and prey to avoid areas of high predation risk. However, there is a scarcity of empirical knowledge on predator and prey spatial use when both are moving freely in their natural environment. In the current study, we use information collated on a predators diet, its population structure, as well as predator and prey relat…						1			1	0030-1299		CCC:000304389900009
J	Macesic, Laura J.; Summers, Adam P.						Flexural stiffness and composition of the batoid propterygium as predictors of punting ability						JOURNAL OF EXPERIMENTAL BIOLOGY			215	12			2003	2012					2012-06-01	2012	Elasmobranchs (sharks, skates and rays) perform at the extremes of locomotion and feeding (i.e. long migrations, high-speed swimming and durophagy). However, very little is known about their cartilaginous skeletal structure and composition in response to loading regimes. In this study, we investigated a batoid (skate and ray) appendicular skeletal element, the propterygium, and its response to fo…						0			0	0022-0949		CCC:000304423200006
J	Mandelman, John W.; Skomal, Gregory B.						The physiological stress response in elasmobranch fishes: Selected papers from a symposium at the 26th annual meeting of the American Elasmobranch Society Preface						COMPARATIVE BIOCHEMISTRY AND PHYSIOLOGY A-MOLECULAR & INTEGRATIVE PHYSIOLOGY			162	2			71	72					2012-06-01	2012							0			0	1095-6433		CCC:000304333400001
J	Hoffmayer, Eric R.; Hendon, Jill M.; Parsons, Glenn R.						Seasonal modulation in the secondary stress response of a carcharhinid shark, Rhizoprionodon terraenovae						COMPARATIVE BIOCHEMISTRY AND PHYSIOLOGY A-MOLECULAR & INTEGRATIVE PHYSIOLOGY			162	2			81	87					2012-06-01	2012	Some animals have the ability to modulate their stress response depending on the type and duration of the stressor. Modulations can initiate behavioral changes that increase fitness during the stressful period. The goal of this study was to determine if Atlantic sharpnose sharks, Rhizoprionodon terraenovae, exhibit seasonal modulations in their secondary stress parameters. Mature, male Atlantic s…						1			1	1095-6433		CCC:000304333400003
J	Frick, Lorenz H.; Walker, Terence I.; Reina, Richard D.						Immediate and delayed effects of gill-net capture on acid-base balance and intramuscular lactate concentration of gummy sharks, Mustelus antarcticus						COMPARATIVE BIOCHEMISTRY AND PHYSIOLOGY A-MOLECULAR & INTEGRATIVE PHYSIOLOGY			162	2			88	93		10.1016/j.cbpa.2011.02.023			2012-06-01	2012	Many sharks are captured as untargeted by-catch during commercial fishing operations and are subsequently discarded. A reliable assessment of the proportion of discarded sharks that die post-release as a result of excessive physiological stress is important for fisheries management and conservation purposes, but a reliable physiological predictor of post-release mortality has not been identified.…						0			0	1095-6433		CCC:000304333400004
J	Brooks, Edward J.; Mandelman, John W.; Sloman, Katherine A.; Liss, Stephanie; Danylchuk, Andy J.; Cooke, Steven J.; Skomal, Gregory B.; Philipp, David P.; Sims, David W.; Suski, Cory D.						The physiological response of the Caribbean reef shark (Carcharhinus perezi) to longline capture						COMPARATIVE BIOCHEMISTRY AND PHYSIOLOGY A-MOLECULAR & INTEGRATIVE PHYSIOLOGY			162	2			94	100					2012-06-01	2012	Longline fishing is the most common elasmobranch capture method around the world, yet the physiological consequences of this technique are poorly understood. To quantify the sub-lethal effects of longline capture in the commonly exploited Caribbean reef shark (Carcharhinus perezi), 37 individuals were captured using standard, mid-water longlines. Hook timers provided hooking duration to the neare…						0			0	1095-6433		CCC:000304333400005
J	Renshaw, Gillian M. C.; Kutek, Ania K.; Grant, Gary D.; Anoopkumar-Dukie, Shailendra						Forecasting elasmobranch survival following exposure to severe stressors						COMPARATIVE BIOCHEMISTRY AND PHYSIOLOGY A-MOLECULAR & INTEGRATIVE PHYSIOLOGY			162	2			101	112					2012-06-01	2012	Current fishing practices and habitat degradation in most of the world's oceans pose significant threats to marine fish including elasmobranchs. The accurate prediction of survival probability for elasmobranchs subjected to prolonged immobilisation and diminished oxygen availability during capture and a vulnerable state post-release, is reliant on selecting a reliable set of biomarkers to profile…						0			0	1095-6433		CCC:000304333400006
J	Hyatt, Michael W.; Anderson, Paul A.; O'Donnell, Patrick M.; Berzins, Ilze K.						Assessment of acid-base derangements among bonnethead (Sphyrna tiburo), bull (Carcharhinus leucas), and lemon (Negaprion brevirostris) sharks from gillnet and longline capture and handling methods						COMPARATIVE BIOCHEMISTRY AND PHYSIOLOGY A-MOLECULAR & INTEGRATIVE PHYSIOLOGY			162	2			113	120					2012-06-01	2012	Blood gasses of wild bonnethead, bull, and lemon sharks were measured with the i-STAT clinical analyzer with the CG4+ cartridge immediately after capture; and again immediately prior to release after tagging, handling and morphometric measurements were taken. Relative reference ranges of post-capture status were established. Among species, stress response to capture was similar for all parameters…						0			0	1095-6433		CCC:000304333400007
J	Marshall, Heather; Field, Lyndsay; Afiadata, Achankeng; Sepulveda, Chugey; Skomal, Gregory; Bernal, Diego						Hematological indicators of stress in longline-captured sharks						COMPARATIVE BIOCHEMISTRY AND PHYSIOLOGY A-MOLECULAR & INTEGRATIVE PHYSIOLOGY			162	2			121	129					2012-06-01	2012	For many shark species, little information exists about the stress response to capture and release in commercial longline fisheries. Recent studies have used hematological profiling to assess the secondary stress response, but little is known about how, and to what degree, these indicators vary interspecifically. Moreover, there is little understanding of the extent to which the level of relative…						0			0	1095-6433		CCC:000304333400008
J	Brinn, R. P.; Marcon, J. L.; McComb, D. M.; Gomes, L. C.; Abreu, J. S.; Baldisseroto, B.						Stress responses of the endemic freshwater cururu stingray (Potamotrygon cf. histrix) during transportation in the Amazon region of the Rio Negro						COMPARATIVE BIOCHEMISTRY AND PHYSIOLOGY A-MOLECULAR & INTEGRATIVE PHYSIOLOGY			162	2			139	145					2012-06-01	2012	Potamotrygon cf. histrix (cururu stingray) are endemic freshwater stingrays from the middle region of the Rio Negro in the Brazilian Amazon basin and are exported worldwide as ornamentals caught by artisanal fishermen. The transport process from capture to final destination is long and stressful. This study quantified stress related changes in corticosterone, blood and water samples (baseline, pr…						0			0	1095-6433		CCC:000304333400010
J	Skomal, Gregory B.; Mandelman, John W.						The physiological response to anthropogenic stressors in marine elasmobranch fishes: A review with a focus on the secondary response						COMPARATIVE BIOCHEMISTRY AND PHYSIOLOGY A-MOLECULAR & INTEGRATIVE PHYSIOLOGY			162	2			146	155					2012-06-01	2012	Elasmobranchs (sharks, rays, and skates) are currently facing substantial anthropogenic threats, which expose them to acute and chronic stressors that may exceed in severity and/or duration those typically imposed by natural events. To date, the number of directed studies on the response of elasmobranch fishes to acute and chronic stress are greatly exceeded by those related to teleosts. Of the l…						0			0	1095-6433		CCC:000304333400011
J	Nadon, Marc O.; Baum, Julia K.; Williams, Ivor D.; McPherson, Jana M.; Zgliczynski, Brian J.; Richards, Benjamin L.; Schroeder, Robert E.; Brainard, Russell E.						Re-Creating Missing Population Baselines for Pacific Reef Sharks						CONSERVATION BIOLOGY			26	3			493	503		10.1111/j.1523-1739.2012.01835.x			2012-06-01	2012	Sharks and other large predators are scarce on most coral reefs, but studies of their historical ecology provide qualitative evidence that predators were once numerous in these ecosystems. Quantifying density of sharks in the absence of humans (baseline) is, however, hindered by a paucity of pertinent time-series data. Recently researchers have used underwater visual surveys, primarily of limited…						0			0	0888-8892		WOS:000304135300013
J	Hammerschlag, Neil; Gallagher, Austin J.; Wester, Julia; Luo, Jiangang; Ault, Jerald S.						Don't bite the hand that feeds: assessing ecological impacts of provisioning ecotourism on an apex marine predator						FUNCTIONAL ECOLOGY			26	3			567	576					2012-06-01	2012	1. There has been considerable debate over the past decade with respect to wildlife provisioning, especially resultant behavioural changes that may impact the ecological function of an apex predator. The controversy is exemplified by the shark diving industry, where major criticisms based on inference, anecdote and opinion stem from concerns of potential behaviourally mediated ecosystem effects b…						0			0	0269-8463		CCC:000304256500004
J	Fujito, Naoko T.; Nonaka, Masaru						Highly divergent dimorphic alleles of the proteasome subunit beta type-8 (PSMB8) gene of the bichir Polypterus senegalus: implication for evolution of the PSMB8 gene of jawed vertebrates						IMMUNOGENETICS			64	6			447	453		10.1007/s00251-012-0602-8			2012-06-01	2012	The proteasome subunit beta type-8 () gene encodes a catalytic subunit of the immunoproteasome, which is involved in the generation of peptides presented by MHC class I molecules. To date, highly diverged dichotomous alleles of have been reported in species (actinopterygian teleosts) and species (sarcopterygian amphibians). These dimorphic alleles share a similar substitution (A/(VF)-F-31/Y) at t…						0			0	0093-7711		WOS:000304110200004
J	Whitney, Nicholas M.; Robbins, William D.; Schultz, Jennifer K.; Bowen, Brian W.; Holland, Kim N.						Oceanic dispersal in a sedentary reef shark (Triaenodon obesus): genetic evidence for extensive connectivity without a pelagic larval stage						JOURNAL OF BIOGEOGRAPHY			39	6			1144	1156		10.1111/j.1365-2699.2011.02660.x			2012-06-01	2012	Aim Most reef fishes are site-attached, but can maintain a broad distribution through their highly dispersive larval stage. The whitetip reef shark (Triaenodon obesus) is site-attached, yet maintains the largest Indo-Pacific distribution of any reef shark while lacking the larval stage of bony (teleost) fishes. Here we use mitochondrial DNA (mtDNA) sequence data to evaluate the enigma of the sede…						0			0	0305-0270		WOS:000304139100012
J	Lee, Randall S.; Black, Kerry P.; Bosserel, Cyprien; Greer, Dougal						Present and future prolonged drought impacts on a large temperate embayment: Port Phillip Bay, Australia						OCEAN DYNAMICS			62	6			907	922					2012-06-01	2012	Observations of a large temperate embayment in Victoria, Australia, reveal a sustained climatic shift that occurred in response to a prolonged drought in the region during 1997-2009. Historically, the bay is fresher than the ocean with fresh outflow to the sea. However, the drought has caused substantially elevated salinity and temperatures above adjacent oceanic waters. The bay's capacity to dil…						0			0	1616-7341		CCC:000304308500007
J	Awrejcewicz, J.; Krysko, V. A.; Papkova, I. V.; Krysko, A. V.						Routes to chaos in continuous mechanical systems. Part 1: Mathematical models and solution methods						CHAOS SOLITONS & FRACTALS			45	6			687	708					2012-06-01	2012	In this work chaotic dynamics of continuous mechanical systems such as flexible plates and shallow shells is studied. Namely, a wide class of the mentioned objects is analyzed including flexible plates and cylinder-like panels of infinite length, rectangular spherical and cylindrical shells, closed cylindrical shells, axially symmetric plates, as well as spherical and conical shells. The consider…						0			0	0960-0779		CCC:000304213300001
J	Awrejcewicz, J.; Krysko, A. V.; Papkova, I. V.; Krysko, V. A.						Routes to chaos in continuous mechanical systems. Part 3: The Lyapunov exponents, hyper, hyper-hyper and spatial-temporal chaos						CHAOS SOLITONS & FRACTALS			45	6			721	736					2012-06-01	2012	Third part of the paper is devoted to analysis of the hyper, hyper-hyper and spatial-temporal chaos of continuous mechanical systems using the Lyapunov exponents. The constructed algorithms for the Lyapunov exponents' computation allowed detecting and analysing novel phase transitions from chaos through hyper chaos to hyper-hyper chaos. In addition, a novel characteristic "maximal deflection vers…						0			0	0960-0779		CCC:000304213300003
J	Little, Alexander G.; Lougheed, Stephen C.; Moyes, Christopher D.						Evolution of mitochondrial-encoded cytochrome oxidase subunits in endothermic fish: The importance of taxon-sampling in codon-based models						MOLECULAR PHYLOGENETICS AND EVOLUTION			63	3			679	684					2012-06-01	2012	While endothermy is ubiquitous in birds and mammals, it is not exclusive to these most recently arisen vertebrate classes. The ability to warm specific organs and/or tissues above ambient temperature (regional endothermy) has evolved at least three times in phylogentically discrete fish lineages: lamnid sharks (Lamnidae), tunas (Scombridae) and billfishes (Istiophoridae and Xiphidae). Given the l…						0			0	1055-7903		CCC:000303907200013
J	Knight, Kathryn						TADPOLE MADTOM VENOM KEEPS PREDATORS AT BAY						JOURNAL OF EXPERIMENTAL BIOLOGY			215	11			I	II		10.1242/jeb.074286			2012-06-01	2012							0			0	0022-0949		WOS:000303831800002
J	Knight, Kathryn						RECIPE FOR A SUCCESSFUL TOUCH DOWN: FLY STYLE						JOURNAL OF EXPERIMENTAL BIOLOGY			215	11			II	II		10.1242/jeb.074294			2012-06-01	2012							0			0	0022-0949		WOS:000303831800003
J	Bucking, Carol; Wood, Chris M.; Grosell, Martin						Diet influences salinity preference of an estuarine fish, the killifish Fundulus heteroclitus						JOURNAL OF EXPERIMENTAL BIOLOGY			215	11			1965	1974		10.1242/jeb.061515			2012-06-01	2012	Understanding the interplay among the external environment, physiology and adaptive behaviour is crucial for understanding how animals survive in their natural environments. The external environment can have wide ranging effects on the physiology of animals, while behaviour determines which environments are encountered. Here, we identified changes in the behavioural selection of external salinity…						0			0	0022-0949		WOS:000303831800028
J	Hurtado-Banda, Rocio; Gomez-Alvarez, Agustin; Fernando Marquez-Farias, J.; Cordoba-Figueroa, Marcial; Navarro-Garcia, Gerardo; Angel Medina-Juarez, Luis						Total Mercury in Liver and Muscle Tissue of Two Coastal Sharks from the Northwest of Mexico						BULLETIN OF ENVIRONMENTAL CONTAMINATION AND TOXICOLOGY			88	6			971	975		10.1007/s00128-012-0623-x			2012-06-01	2012	Total mercury (THg) in liver and muscle of three costal sharks from Mexico were evaluated. The highest concentrations of THg in muscle tissue of juveniles were found in Sphyrna lewini (0.82 +/- A 0.33 mg kg(-1) wet basis). Rhizoprionodon longurio adults had the highest concentrations (0.92 +/- A 1.03 mg kg(-1)). THg concentrations in liver were low compared to those found in muscle tissue; higher…						0			0	4861-07-01		WOS:000303544900033
J	Speed, C. W.; Meekan, M. G.; Field, I. C.; McMahon, C. R.; Abrantes, K.; Bradshaw, C. J. A.						Trophic ecology of reef sharks determined using stable isotopes and telemetry						CORAL REEFS			31	2			357	367		10.1007/s00338-011-0850-3			2012-06-01	2012	Establishing the ecological role of predators within an ecosystem is central to understanding community dynamics and is useful in designing effective management and conservation strategies. We analysed differences in the trophic ecology of four species of reef sharks (Carcharhinus melanopterus, Carcharhinus amblyrhynchos, Triaenodon obesus and Negaprion acutidens) at Ningaloo Reef, Western Austra…						0			0	0722-4028		WOS:000303450100006
J	Ceccarelli, D. M.; Williamson, D. H.						Sharks that eat sharks: opportunistic predation by wobbegongs						CORAL REEFS			31	2			471	471		10.1007/s00338-012-0878-z			2012-06-01	2012							0			0	0722-4028		WOS:000303450100018
J	Deakos, Mark H.						The reproductive ecology of resident manta rays (Manta alfredi) off Maui, Hawaii, with an emphasis on body size						ENVIRONMENTAL BIOLOGY OF FISHES			94	2			443	456		10.1007/s10641-011-9953-5			2012-06-01	2012	In resident manta rays (Manta alfredi) off Maui, sexual maturity appears delayed until growth exceeds 90% of maximum size, an indicator that large body size provides a reproductive advantage at the expense of a shorter reproductive time period. In this study, 286 surveys were conducted between 2005 and 2010 using photo-identification and photogrammetry to study the reproductive ecology of a resid…						0			0	0378-1909		WOS:000303513300007
J	Nagyova, Alzbeta; Kamencayova, Maria; Glasa, Miroslav; Subr, Zdeno W.						The 3'-proximal part of the Plum pox virus P1 gene determinates the symptom expression in two herbaceous host plants						VIRUS GENES			44	3			505	512		10.1007/s11262-012-0726-9			2012-06-01	2012	Three major strains of the Plum pox virus (PPV) are the most important in Europe: PPV-D, PPV-M, and PPV-Rec. By combining the genomes of two different strains of PPV (PPV-D with PPV-Rec; PPV-D with PPV-M), 20 inter-strain chimeric infectious clones (CICPPV) were constructed. Biological properties of CICPPV were tested by inoculating them on different herbaceous host species susceptible to PPV. Fo…						0			0	0920-8569		WOS:000303469800019
J	Pomin, Vitor H.; Park, Younghee; Huang, Rongrong; Heiss, Christian; Sharp, Joshua S.; Azadi, Parastoo; Prestegard, James H.						Exploiting enzyme specificities in digestions of chondroitin sulfates A and C: Production of well-defined hexasaccharides						GLYCOBIOLOGY			22	6			826	838		10.1093/glycob/cws055			2012-06-01	2012	Interactions between proteins and glycosaminoglycans (GAGs) of the extracellular matrix are important to the regulation of cellular processes including growth, differentiation and migration. Understanding these processes can benefit greatly from the study of protein-GAG interactions using GAG oligosaccharides of well-defined structure. Materials for such studies have, however, been difficult to o…						0			0	0959-6658		WOS:000303334400008
J	Adnet, S.; Guinot, G.; Cappetta, H.; Welcomme, J. -L.						Oldest evidence of bramble sharks (Elasmobranchii, Echinorhinidae) in the Lower Cretaceous of southeast France and the evolutionary history of orbitostylic sharks						CRETACEOUS RESEARCH			35				81	87		10.1016/j.cretres.2011.11.021			2012-06-01	2012	Two shark teeth from the Early Cretaceous limestone (Late Hauterivian, Pseudothurmannia ohmi Zone, Pseudothurmannia catulloi Subzone) of Nyons (Drome) in southeast France are reported here as Echinorhinus sp. They represent the oldest record of the family Echinorhinidae (Elasmobranchii), an enigmatic and primitive branch of living deep-sea sharks. This discovery has allowed completion of the foss…						0			0	0195-6671		WOS:000301761000006
J	Soto, Matias; Perea, Daniel; Torino, Pablo						New remains of Priohybodus arambourgi (Hybodontiformes: Hybodontidae) from Late Jurassic-?earliest Cretaceous deposits in Uruguay						CRETACEOUS RESEARCH			35				118	123		10.1016/j.cretres.2011.12.001			2012-06-01	2012	We describe new multicuspid, laterally compressed, and serrated tooth crowns from the Batovi Member (Late Jurassic-?earliest Cretaceous) of the Tacuarembo Formation, Uruguay. These specialized tooth crowns are referable to Priohybodus arambourgi (Hybodontidae). Among them, there is a pathological crown with the second lateral cusplet larger than the first, a morphological feature not described be…						0			0	0195-6671		WOS:000301761000009
J	Ziegler, Jackie; Dearden, Philip; Rollins, Rick						But are tourists satisfied? Importance-performance analysis of the whale shark tourism industry on Isla Holbox, Mexico						TOURISM MANAGEMENT			33	3			692	701		10.1016/j.tourman.2011.08.004			2012-06-01	2012	The objective of this paper is to understand the motivations and satisfactions of whale shark tour participants on Isla Holbox, Mexico in order to assess the success of this industry in meeting customer expectations. Whale shark tour participants were provided with a list of environmental and setting features and asked to rate the importance of, and satisfaction with, each feature. Importance-per…						0			0	0261-5177		WOS:000299973600022
J	Zhu, Catherine; Lee, Victor; Finn, Alyssa; Senger, Kate; Zarrin, Ali A.; Du Pasquier, Louis; Hsu, Ellen						Origin of Immunoglobulin Isotype Switching						CURRENT BIOLOGY			22	10			872	880					MAY 22 2012	2012	Background: From humans to frogs, immunoglobulin class switching introduces different effector functions to antibodies through an intrachromosomal DNA recombination process at the heavy-chain locus. Although there are two conventional antibody classes (IgM, IgW) in sharks, their heavy chains are encoded by 20 to >100 miniloci. These representatives of the earliest jawed vertebrates possess a prim…						0			0	0960-9822		CCC:000304432700020
J	Cuerno, R.; Escudero, C.; Garcia-Ruiz, J. M.; Herrero, M. A.						Pattern formation in stromatolites: insights from mathematical modelling						JOURNAL OF THE ROYAL SOCIETY INTERFACE			9	70			1051	1062		10.1098/rsif.2011.0516			MAY 7 2012	2012	To this day, computer models for stromatolite formation have made substantial use of the Kardar-Parisi-Zhang (KPZ) equation. Oddly enough, these studies yielded mutually exclusive conclusions about the biotic or abiotic origin of such structures. We show in this paper that, at our current state of knowledge, a purely biotic origin for stromatolites can neither be proved nor disproved by means of …						0			0	1742-5689		WOS:000302134300023
J	Salvador, Jorge A. R.; Silvestre, Samuel M.; Moreira, Vania M.						Recent Developments in Oxidative Processes in Steroid Chemistry						CURRENT ORGANIC CHEMISTRY			16	10			1243	1276					2012-05-01	2012	Oxygenated steroids are bioactive compounds and valuable intermediates in the synthesis of biologically active products and APIs. This review will cover the literature from 2005/06 to the present concerning allylic oxidation, epoxidation and syn-dihydroxylation of alkenes, alcohol oxidation, and remote functionalization reactions of steroidal substrates.						0			0	1385-2728		CCC:000304267000003
J	Jarvis, Hannah C.; Matheny, Lauren M.; Clanton, Thomas O.						Stingray Injury to the Webspace of the Foot						ORTHOPEDICS			35	5			E762	E765					2012-05-01	2012	Stingrays are cartilaginous fish that are related to sharks. They are one of the largest groups of venomous marine animals. Stingrays account for 750 to 2000 injuries annually. They are generally passive, reclusive creatures that only sting in self-defense. Most injuries caused by these animals are nonfatal. A stingray possesses between 1 and 4 venomous stings, which are located along the caudal …						0			0	0147-7447		CCC:000304363100025
J	Guinot, Guillaume; Underwood, Charlie J.; Cappetta, Henri; Ward, David J.						Squatiniformes (Chondrichthyes, Neoselachii) from the Late Cretaceous of southern England and northern France with redescription of the holotype of Squatina cranei Woodward, 1888			Part 3			PALAEONTOLOGY			55				529	551		10.1111/j.1475-4983.2012.01140.x			2012-05-01	2012	Bulk sampling of phosphate-rich horizons within the Late Cretaceous of the Anglo-Paris Basin yielded numerous teeth of members of the Squatiniformes. Along with isolated tooth remains, two museum specimens comprising partial articulated encoskeletal remains including the holotype of the species Squatina cranei Woodward, 1888a are described, and a new subgenus Cretascyllium is proposed for species…						0			0	0031-0239		WOS:000303916100003
J	Chen, Hao; Bernstein, Harris; Ranganathan, Parvathi; Schluter, Samuel F.						Somatic hypermutation of TCR gamma V genes in the sandbar shark						DEVELOPMENTAL AND COMPARATIVE IMMUNOLOGY			37	1			176	183		10.1016/j.dci.2011.08.018			2012-05-01	2012	In a recent publication we demonstrated that somatic hypermutation occurs in the V region of the TCR gamma gene of the sandbar shark (Carcharhinus plumbous). We hypothesize that similar mechanisms are used to generate somatic mutations in both immunoglobulin and TCR gamma genes of the sharks. Two distinct patterns of mutation occur, single nucleotide mutations (point mutations) and mutations comp…						0			0	0145-305X		WOS:000304024700018
J	Holtcamp, Wendee						Shark Fin Consumption May Expose People to Neurotoxic BMAA						ENVIRONMENTAL HEALTH PERSPECTIVES			120	5			A191	A191					2012-05-01	2012							0			0	0091-6765		WOS:000303546000007
J	Claes, Julien M.; Ho, Hsuan-Ching; Mallefet, Jerome						Control of luminescence from pygmy shark (Squaliolus aliae) photophores						JOURNAL OF EXPERIMENTAL BIOLOGY			215	10			1691	1699		10.1242/jeb.066704			2012-05-01	2012	The smalleye pygmy shark (Squaliolus aliae) is a dwarf pelagic shark from the Dalatiidae family that harbours thousands of tiny photophores. In this work, we studied the organisation and physiological control of these photogenic organs. Results show that they are mainly situated on the ventral side of the shark, forming a homogeneous ventral photogenic area that appears well suited for counterill…						1			1	0022-0949		WOS:000303828900014
J	Selim, H. Magdi; Naquin, Brian J.; Liao, Lixia						Adsorption and Desorption of Atrazine Retention by Sugarcane Residue and Soils						SOIL SCIENCE			177	5			332	337		10.1097/SS.0b013e3182498ca5			2012-05-01	2012	Quantifying herbicide retention in the soil environment is essential for minimizing their runoff and contamination of groundwater resources. In this study, atrazine retention characteristics were carried out for sugarcane (Saccharum spp. Hyb.) residue grown on Sharkey clay and Commerce loam soils. The residue that covers the soil surface following combine harvesting was sampled over several growi…						0			0	0038-075X		WOS:000303604400005
P	Crihan, Ioan G.; Woods, Geoffrey G.; Hyams, Jerrold E.						CerCan: an energy supplement product for boosting the immune system			US 08168173			Official Gazette of the United States Patent and Trademark Office Patents													MAY 1 2012	2012	This invention concerns the process of creating an energy supplement product, good also as an anti-aging, aphrodisiac and as an alternative source to prevent or to remedy some diseases. The product is a composition of five ingredients: four marine animals (sea cucumber, sea urchin, sea sponge, and shark fin), and an algae called Sargassum. These ingredients are sterilized and then dried by using …						0			0	0098-1133		BCI:BCI201200406458
J	Tillett, J.; Meekan, M. G.; Field, I. C.; Thorburn, D. C.; Ovenden, J. R.						Evidence for reproductive philopatry in the bull shark Carcharhinus leucas						JOURNAL OF FISH BIOLOGY			80	6			2140	2158		10.1111/j.1095-8649.2012.03228.x			2012-05-01	2012	Reproductive philopatry in bull sharks Carcharhinus leucas was investigated by comparing mitochondrial (NADH dehydrogenase subunit 4, 797 base pairs and control region genes 837 base pairs) and nuclear (three microsatellite loci) DNA of juveniles sampled from 13 river systems across northern Australia. High mitochondrial and low microsatellite genetic diversity among juveniles sampled from differ…						0			0	0022-1112		WOS:000303496300002
J	Makiguchi, Y.; Sugie, Y.; Kojima, T.; Naito, Y.						Detection of feeding behaviour in common carp Cyprinus carpio by using an acceleration data logger to identify mandibular movement						JOURNAL OF FISH BIOLOGY			80	6			2345	2356		10.1111/j.1095-8649.2012.03293.x			2012-05-01	2012	Miniaturized acceleration data loggers were attached to the lower mandible of common carp Cyprinus carpio to remotely identify feeding behaviour. Whether the acceleration signal could distinguish the quantity and quality of food was also investigated. The frequency and amplitude of the lower mandible stroke, calculated from surging acceleration determined by continuous wavelet transformation, sig…						0			0	0022-1112		WOS:000303496300014
J	Daly-Engel, Toby S.; Randall, John E.; Bowen, Brian W.						Is the Great Barracuda (Sphyraena barracuda) a reef fish or a pelagic fish? The phylogeographic perspective						MARINE BIOLOGY			159	5			975	985		10.1007/s00227-012-1878-9			2012-05-01	2012	Current taxonomy indicates a single global species of the Great Barracuda (Sphyraena barracuda) despite differences in color and behavior between Atlantic and Pacific forms. To investigate these differences and qualify the dispersal characteristics of this unique coastal-pelagic teleost (bony fish), we conducted a global phylogeographic survey of 246 specimens from thirteen sampling locations usi…						0			0	0025-3162		WOS:000303391700005
J	Loong, Ai M.; Chew, Shit F.; Wong, Wai P.; Lam, Siew H.; Ip, Yuen K.						Both seawater acclimation and environmental ammonia exposure lead to increases in mRNA expression and protein abundance of Na+:K+:2Cl(-) cotransporter in the gills of the climbing perch, Anabas testudineus						JOURNAL OF COMPARATIVE PHYSIOLOGY B-BIOCHEMICAL SYSTEMIC AND ENVIRONMENTAL PHYSIOLOGY			182	4			491	506		10.1007/s00360-011-0634-7			2012-05-01	2012	The freshwater climbing perch, Anabas testudineus, is an obligatory air-breathing teleost which can acclimate to seawater, survive long period of emersion, and actively excrete ammonia against high concentrations of environmental ammonia. This study aimed to clone and sequence the Na+:K+:2Cl(-) cotransporter (nkcc) from the gills of A. testudineus, and to determine the effects of seawater acclima…						0			0	0174-1578		WOS:000303061800003
J	Pepe-Ranney, Charles; Berelson, William M.; Corsetti, Frank A.; Treants, Merika; Spear, John R.						Cyanobacterial construction of hot spring siliceous stromatolites in Yellowstone National Park						ENVIRONMENTAL MICROBIOLOGY			14	5			1182	1197		10.1111/j.1462-2920.2012.02698.x			2012-05-01	2012	Living stromatolites growing in a hot spring in Yellowstone National Park are composed of silica-encrusted cyanobacterial mats. Two cyanobacterial mat types grow on the stromatolite surfaces and are preserved as two distinct lithofacies. One mat is present when the stromatolites are submerged or at the wateratmosphere interface and the other when stromatolites protrude from the hot spring. The li…						0			0	1462-2912		WOS:000302934000007
J	Li, Chenhong; Matthes-Rosana, Kerri A.; Garcia, Michael; Naylor, Gavin J. P.						Phylogenetics of Chondrichthyes and the problem of rooting phylogenies with distant outgroups						MOLECULAR PHYLOGENETICS AND EVOLUTION			63	2			365	373		10.1016/j.ympev.2012.01.013			2012-05-01	2012	Erroneous estimates of ingroup relationships can be caused by attributes in the outgroup chosen to root the tree. Phylogenetic analyses of DNA sequences frequently yield incorrect estimates of ingroup relationships when the outgroup used to "root" the tree is highly divergent from the ingroup. This is especially the case when the outgroup has a different base composition than the ingroup. Unfortu…						0			0	1055-7903		WOS:000302202000013
J	Sequeira, Ana; Mellin, Camille; Rowat, David; Meekan, Mark G.; Bradshaw, Corey J. A.						Ocean-scale prediction of whale shark distribution						DIVERSITY AND DISTRIBUTIONS			18	5			504	518		10.1111/j.1472-4642.2011.00853.x			2012-05-01	2012	Aim Predicting distribution patterns of whale sharks (Rhincodon typus, Smith 1828) in the open ocean remains elusive owing to few pelagic records. We developed multivariate distribution models of seasonally variant whale shark distributions derived from tuna purse-seine fishery data. We tested the hypotheses that whale sharks use a narrow temperature range, are more abundant in productive waters …						0			0	1366-9516		WOS:000302358300008
J	Schwarz, Cathrin; Parmentier, Eric; Wiehr, Stefan; Gemballa, Sven						The locomotory system of pearlfish Carapus acus: What morphological features are characteristic for highly flexible fishes?						JOURNAL OF MORPHOLOGY			273	5			519	529		10.1002/jmor.11038			2012-05-01	2012	The body curvature displayed by fishes differs remarkably between species. Some nonmuscular features (e.g., number of vertebrae) are known to influence axial flexibility, but we have poor knowledge of the influence of the musculotendinous system (myosepta and muscles). Whereas this system has been described in stiff-bodied fishes, we have little data on flexible fishes. In this study, we present …						0			0	0362-2525		WOS:000301776500004
J	Klaer, Neil L.; Smith, David C.						Determining primary and companion species in a multi-species fishery: Implications for TAC setting						MARINE POLICY			36	3			606	612		10.1016/j.marpol.2011.10.004			2012-05-01	2012	The use of ITQ management in multi-species fisheries has been the subject of much debate and the complexities and difficulties of managing multi-species fisheries are well known. A major problem is that the species mix in fishery catches may not necessarily match the mix in combined TACs or in quota holdings. While a number of solutions have been proposed or implemented to improve transferability…						0			0	0308-597X		WOS:000300201100006
J	[Anonymous]						Shark and awe						NEW SCIENTIST			214	2862			3	3					APR 28 2012	2012							0			0	0262-4079		WOS:000303552700002
J	Nicholls, Henry						Under attack						NEW SCIENTIST			214	2862			36	39					APR 28 2012	2012							0			0	0262-4079		WOS:000303552700037
J	Raissy, Mehdi; Zandi, Sasan; Ahmadi, Arman; Foroutan, Mohammad Seyed; Fadaeifard, Firouz						Experimental evaluation of pathogenicity of Streptococcus iniae in Silver Shark and Rainbow Shark						AFRICAN JOURNAL OF MICROBIOLOGY RESEARCH			6	14			3560	3563		10.5897/AJMR12.588			APR 16 2012	2012	Streptococcus iniae is a main cause of streptococcosis causing the disease in a wide variety of fresh and salt water fish species. This study was aimed to evaluate the pathogenicity of S. iniae in two aquarium fish species, silver shark and rainbow shark. Apparently healthy fish were obtained from a local ornamental fish farm and were injected intraperitoneally with 1x10(7) cfu of the bacteria af…						0			0	1996-0808		WOS:000303823800027
J	Pemha, Rene; Pegnyemb, Dieudonne Emmanuel; Mosset, Paul						Synthesis of (Z)-(2 ' R)-1-O-(2 '-methoxynonadec-10 '-enyl)-sn-glycerol, a new analog of bioactive ether lipids						TETRAHEDRON			68	14			2973	2983		10.1016/j.tet.2012.02.033			APR 8 2012	2012	An unsaturated 2-methoxy-substituted 1-O-alkylglycerol, (Z)-(2'R)-1-O-(2'-methoxynonadec-10'-enyl)-sn-glycerol, a new analog of bioactive ether lipids, was synthesized from oleic acid and 2,3-isopropylidene-sn-glycerol. The two key steps of this synthesis were the conversion of oleyl aldehyde to a monounsaturated epoxide using Matteson's method followed by hydrolytic kinetic resolution and a nucl…						0			0	0040-4020		WOS:000302451100005
J	Reinick, Christina L.; Liang, Liang; Angleson, Josepha K.; Dores, Robert M.						Functional expression of Squalus acanthias melanocortin-5 receptor in CHO cells: Ligand selectivity and interaction with MRAP						EUROPEAN JOURNAL OF PHARMACOLOGY			680	2012-01-03			1	7		10.1016/j.ejphar.2012.01.021			APR 5 2012	2012	The melanocortin-5 receptor (MC5) of the dogfish Squalus acanthias (SacMC(5) receptor) can be functionally expressed in CHO cells in the absence of the co-expression of an exogenous MRAP cDNA. Both human ACTH(1-24) and dogfish ACTH(1-25) were much better stimulators of the SacMC(5) receptor than any of the mammalian or dogfish MSH ligands that were tested. The order of ligand selectivity for the …						0			0	0014-2999		WOS:000300986300001
J	Monchai, Siriprumpoonthum; Mieda, Naoya; Doan, Vu Anh; Nobukawa, Shogo; Yamaguchi, Masayuki						Effect of shear history on flow instability at capillary extrusion for long-chain branched polyethylene						JOURNAL OF APPLIED POLYMER SCIENCE			124	1			429	435		10.1002/app.35108			APR 5 2012	2012	Effect of applied processing history on flow instability at capillary extrusion is studied using a commercially available low-density polyethylene (LDPE) having long-chain branches. It is found that processing history in an internal mixer in a molten state depresses long-time relaxation mechanism associated with long-chain branches, which is known as shear modification. Consequently, the onset of…						0			0	0021-8995		WOS:000298637300050
J	Murota, Itsuki; Tamai, Tadakazu; Baba, Takashi; Sato, Nobuyuki; Park, Eun Young; Nakamura, Yasushi; Sato, Kenji						Moderation of oxonate-induced hyperuricemia in rats via the ingestion of an ethanol-soluble fraction of a shark cartilage proteolytic digest						JOURNAL OF FUNCTIONAL FOODS			4	2			459	464					2012-04-01	2012	A shark cartilage proteolytic digest was fractionated by selective extraction with 75% ethanol. Peptides in the digest were recovered in the 75% ethanol-soluble fraction. The ethanol-soluble fraction showed lower viscosity and higher solubility in water than the crude digest. Oxonate-induced hyperuricemia in rat was suppressed by the oral administration of the ethanol-soluble fraction of the dige…						0			0	1756-4646		CCC:000304579900006
J	Bhatt, Shweta						Mangrove conservation amidst land sharks						ORYX			46	2			171	172					2012-04-01	2012							0			0	0030-6053		WOS:000303837100005
J	Morgan, Jess A. T.; Harry, Alastair V.; Welch, David J.; Street, Raewyn; White, Jimmy; Geraghty, Pascal T.; Macbeth, William G.; Tobin, Andrew; Simpfendorfer, Colin A.; Ovenden, Jennifer R.						Detection of interspecies hybridisation in Chondrichthyes: hybrids and hybrid offspring between Australian (Carcharhinus tilstoni) and common (C. limbatus) blacktip shark found in an Australian fishery						CONSERVATION GENETICS			13	2			455	463		10.1007/s10592-011-0298-6			2012-04-01	2012	Interspecies hybridisation in nature is a well-studied phenomenon, but it has not been analysed using genetic markers in the class Chondrichthyes (sharks, rays and chimeras). Two black-tip whaler shark species (Australian, Carcharhinus tilstoni; Common, C. limbatus) have overlapping distributions in Australia, distinct mitochondrial DNA sequence (ND4, COI, control region) and distinct morphologic…						0			0	1566-0621		WOS:000303476600015
J	Dean, Mason; Huber, Dan; Goo, Brian; Danos, Nicole; Shimada, Kenshu; Summers, Adam						On the jaws of lamniform sharks						INTEGRATIVE AND COMPARATIVE BIOLOGY			52				E43	E43				1	2012-04-01	2012			Annual Meeting of the Society-for-Integrative-and-Comparative-Biology (SICB)	JAN 03-07, 2012	Soc Integrat & Comparat Biol (SICB)	Charleston, SC	0			0	1540-7063		WOS:000303165000171
J	Dowd, W. W.						Experimental contexts and statistical choices: Challenges for interpreting the proteomics of environmental stress						INTEGRATIVE AND COMPARATIVE BIOLOGY			52				E48	E48				1	2012-04-01	2012			Annual Meeting of the Society-for-Integrative-and-Comparative-Biology (SICB)	JAN 03-07, 2012	Soc Integrat & Comparat Biol (SICB)	Charleston, SC	0			0	1540-7063		WOS:000303165000193
J	Dunbar, M. A.; Davenport, I. R.						Follicle Cell Processes in the Squaliformes, dogfish sharks						INTEGRATIVE AND COMPARATIVE BIOLOGY			52				E238	E238				1	2012-04-01	2012			Annual Meeting of the Society-for-Integrative-and-Comparative-Biology (SICB)	JAN 03-07, 2012	Soc Integrat & Comparat Biol (SICB)	Charleston, SC	0			0	1540-7063		WOS:000303165001415
J	Lauder, G., V; Oeffner, J.						Hydrodynamic function of shark skin and two biomimetic models						INTEGRATIVE AND COMPARATIVE BIOLOGY			52				E101	E101				1	2012-04-01	2012			Annual Meeting of the Society-for-Integrative-and-Comparative-Biology (SICB)	JAN 03-07, 2012	Soc Integrat & Comparat Biol (SICB)	Charleston, SC	0			0	1540-7063		WOS:000303165000403
J	Maia, A.; Lauder, G., V; Wilga, C. D.						Hydrodynamic Function of Dorsal Fins in Sharks						INTEGRATIVE AND COMPARATIVE BIOLOGY			52				E111	E111				1	2012-04-01	2012			Annual Meeting of the Society-for-Integrative-and-Comparative-Biology (SICB)	JAN 03-07, 2012	Soc Integrat & Comparat Biol (SICB)	Charleston, SC	0			0	1540-7063		WOS:000303165000443
J	Mcivor, C. C.						Community ecology of mangrove rivulus at two west Florida locations						INTEGRATIVE AND COMPARATIVE BIOLOGY			52				E294	E294				1	2012-04-01	2012			Annual Meeting of the Society-for-Integrative-and-Comparative-Biology (SICB)	JAN 03-07, 2012	Soc Integrat & Comparat Biol (SICB)	Charleston, SC	0			0	1540-7063		WOS:000303165002081
J	Paig-Tran, E. W. M.; Kleinteich, T.; Summers, A. P.						Exploring the filter morphology and filtration mechanics in Mobulidae						INTEGRATIVE AND COMPARATIVE BIOLOGY			52				E305	E305				1	2012-04-01	2012			Annual Meeting of the Society-for-Integrative-and-Comparative-Biology (SICB)	JAN 03-07, 2012	Soc Integrat & Comparat Biol (SICB)	Charleston, SC	0			0	1540-7063		WOS:000303165002127
J	Porter, M. E.; Grotmol, S.; Kryvi, H.; Totland, G. K.; Long, J. H.						The Vertebral Column of Sharks: Functional Morphology of the Intervertebral Joint						INTEGRATIVE AND COMPARATIVE BIOLOGY			52				E312	E312				1	2012-04-01	2012			Annual Meeting of the Society-for-Integrative-and-Comparative-Biology (SICB)	JAN 03-07, 2012	Soc Integrat & Comparat Biol (SICB)	Charleston, SC	0			0	1540-7063		WOS:000303165002155
J	Porter, M. E.; Diaz, C.; Long, J. H., Jr.						Regional Variation in the Dynamic Mechanical Properties of Shark Vertebral Columns						INTEGRATIVE AND COMPARATIVE BIOLOGY			52				E139	E139				1	2012-04-01	2012			Annual Meeting of the Society-for-Integrative-and-Comparative-Biology (SICB)	JAN 03-07, 2012	Soc Integrat & Comparat Biol (SICB)	Charleston, SC	0			0	1540-7063		WOS:000303165001022
J	Priester, C.; Cornelissen, A.; Kinsey, S.; Dillaman, R.						Nuclear distribution in skeletal muscle of selected members of Chondrichthyes						INTEGRATIVE AND COMPARATIVE BIOLOGY			52				E141	E141				1	2012-04-01	2012			Annual Meeting of the Society-for-Integrative-and-Comparative-Biology (SICB)	JAN 03-07, 2012	Soc Integrat & Comparat Biol (SICB)	Charleston, SC	0			0	1540-7063		WOS:000303165001030
J	Wood, B. M.; Andermann, R. J.; Homberger, D. G.						The morphology of the myomere-myoseptal intersections in a lamprey (Petromyzon marinus) and a shark (Squalus acanthias)						INTEGRATIVE AND COMPARATIVE BIOLOGY			52				E352	E352				1	2012-04-01	2012			Annual Meeting of the Society-for-Integrative-and-Comparative-Biology (SICB)	JAN 03-07, 2012	Soc Integrat & Comparat Biol (SICB)	Charleston, SC	0			0	1540-7063		WOS:000303165002315
J	Bullard, Stephen A.; Ruiz, Carlos F.; McElwain, Andrew; Murray, Michael J.; Borucinska, Joanna D.; Benz, George W.						HUFFMANELA CF. CARCHARHINI (NEMATODA: TRICHOSOMOIDIDAE: HUFFMANELINAE) FROM SKIN OF A SANDBAR SHARK, CARCHARHINUS PLUMBEUS, IN THE PACIFIC OCEAN						JOURNAL OF PARASITOLOGY			98	2			333	340		10.1645/GE-2962.1			2012-04-01	2012	Eggs of Huffmanela cf. carcharhini from the skin of an aquarium-held, juvenile sandbar shark, Carcharhinus plumbeus, from the Pacific Ocean were studied using light and scanning electron microscopy. Grossly, eggs imparted a scribble-like skin marking approximately 130 X 60 mm on the right side of the shark's snout adjacent to its eye and nostril. Fresh (unfixed) eggs were elliptical, 75-95 mu m l…						0			0	0022-3395		WOS:000303275700016
J	Krzyszczyk, Ewa; Mann, Janet						Why become speckled? Ontogeny and function of speckling in Shark Bay bottlenose dolphins (Tursiops sp.)						MARINE MAMMAL SCIENCE			28	2			295	307		10.1111/j.1748-7692.2011.00483.x			2012-04-01	2012	To date, color patterns have been used to assess cetacean age and taxonomic status, but few studies have determined precise correlates of coloration with known age or investigated its function. Here, we examine the ontogeny of speckling in 88 bottlenose dolphins (Tursiops sp.) in Shark Bay, Australia, of known age, tracked from birth to age 34. Ventral speckles first appear in the genital area at…						0			0	0824-0469		WOS:000303051500013
J	Samarra, Filipa I. P.; Fennell, Alexandra; Aoki, Kagari; Deecke, Volker B.; Miller, Patrick J. O.						Persistence of skin marks on killer whales (Orcinus orca) caused by the parasitic sea lamprey (Petromyzon marinus) in Iceland						MARINE MAMMAL SCIENCE			28	2			395	401		10.1111/j.1748-7692.2011.00486.x			2012-04-01	2012							0			0	0824-0469		WOS:000303051500021
J	Fearnbach, Holly; Durban, John; Parsons, Kim; Claridge, Diane						Seasonality of calving and predation risk in bottlenose dolphins on Little Bahama Bank						MARINE MAMMAL SCIENCE			28	2			402	411		10.1111/j.1748-7692.2011.00481.x			2012-04-01	2012							0			0	0824-0469		WOS:000303051500022
J	Knip, Danielle M.; Heupel, Michelle R.; Simpfendorfer, Colin A.						Evaluating marine protected areas for the conservation of tropical coastal sharks						BIOLOGICAL CONSERVATION			148	1			200	209		10.1016/j.biocon.2012.01.008			2012-04-01	2012	Global declines in shark populations have created uncertainty in the future status of many species and conservation efforts are urgently needed. Marine protected areas (MPAs) are used increasingly as conservation tools around the world, but how they benefit mobile and wide ranging species like sharks remains unclear. To evaluate the degree of protection MPAs may provide for sharks, we used an arr…						0			0	3207-06-01		WOS:000302840100021
J	Baremore, Ivy E.; Bethea, Dana M.; Andrews, Kate I.						Gillnet selectivity for juvenile blacktip sharks (Carcharhinus limbatus)						FISHERY BULLETIN			110	2			230	241					2012-04-01	2012	Gillnet mesh selectivity parameters were estimated for juvenile blacktip sharks (Carcharhinus limbatus) by using length data from an experimental fishery-independent gillnet survey in the northeastern Gulf of Mexico. Length data for 1720 blacktip sharks were collected over 17 years (1994-2010) with seven mesh sizes ranging from 7.6 to 20.3 cm. Four selectivity models, a normal model assuming fixe…						0			0	0090-0656		WOS:000303079000007
J	White, W. T.; Blaber, S. J. M.; Craig, J. F.						The current status of elasmobranchs: biology, fisheries and conservation						JOURNAL OF FISH BIOLOGY			80	5	SI		897	900		10.1111/j.1095-8649.2012.03268.x			2012-04-01	2012							0			0	0022-1112		WOS:000302722800001
J	White, W. T.; Last, P. R.						A review of the taxonomy of chondrichthyan fishes: a modern perspective						JOURNAL OF FISH BIOLOGY			80	5	SI		901	917		10.1111/j.1095-8649.2011.03192.x			2012-04-01	2012	Taxonomic clarity is a fundamental requirement as it forms the foundation of all other life sciences. In the last decade, chondrichthyan taxonomy has undergone a scientific renaissance with >180 new species formally described. This effort encompasses c. 15% of the global chondrichthyan fauna, which consists of 1185 currently recognized species. The important role of chondrichthyan taxonomy for co…						1			1	0022-1112		WOS:000302722800002
J	Maisey, J. G.						What is an elasmobranch'? The impact of palaeontology in understanding elasmobranch phylogeny and evolution						JOURNAL OF FISH BIOLOGY			80	5	SI		918	951		10.1111/j.1095-8649.2012.03245.x			2012-04-01	2012	The Subclass Elasmobranchii is widely considered nowadays to be the sister group of the Subclass Holocephali, although chimaeroid fishes were originally classified as elasmobranchs along with modern sharks and rays. While this modern systematic treatment provides an accurate reflection of the phylogenetic relationships among extant taxa, the classification of many extinct non-holocephalan shark-l…						1			1	0022-1112		WOS:000302722800003
J	Barnett, A.; Braccini, J. M.; Awruch, C. A.; Ebert, D. A.						An overview on the role of Hexanchiformes in marine ecosystems: biology, ecology and conservation status of a primitive order of modern sharks						JOURNAL OF FISH BIOLOGY			80	5	SI		966	990		10.1111/j.1095-8649.2012.03242.x			2012-04-01	2012	The large size, high trophic level and wide distribution of Hexanchiformes (cow and frilled sharks) should position this order as important apex predators in coastal and deep-water ecosystems. This review synthesizes available information on Hexanchiformes, including information not yet published, with the purpose of evaluating their conservation status and assessing their ecological roles in the…						0			0	0022-1112		WOS:000302722800005
J	MacNeil, M. A.; McMeans, B. C.; Hussey, N. E.; Vecsei, P.; Svavarsson, J.; Kovacs, K. M.; Lydersen, C.; Treble, M. A.; Skomal, G. B.; Ramsey, M.; Fisk, A. T.						Biology of the Greenland shark Somniosus microcephalus						JOURNAL OF FISH BIOLOGY			80	5	SI		991	1018		10.1111/j.1095-8649.2012.03257.x			2012-04-01	2012	Greenland shark Somniosus microcephalus is a potentially important yet poorly studied cold-water species inhabiting the North Atlantic and Arctic Oceans. Broad-scale changes in the Arctic ecosystem as a consequence of climate change have led to increased attention on trophic dynamics and the role of potential apex predators such as S. microcephalus in the structure of Arctic marine food webs. Alt…						1			1	0022-1112		WOS:000302722800006
J	Rowat, D.; Brooks, K. S.						A review of the biology, fisheries and conservation of the whale shark Rhincodon typus						JOURNAL OF FISH BIOLOGY			80	5	SI		1019	1056		10.1111/j.1095-8649.2012.03252.x			2012-04-01	2012	Although the whale shark Rhincodon typus is the largest extant fish, it was not described until 1828 and by 1986 there were only 320 records of this species. Since then, growth in tourism and marine recreation globally has lead to a significant increase in the number of sightings and several areas with annual occurrences have been identified, spurring a surge of research on the species. Simultane…						1			1	0022-1112		WOS:000302722800007
J	Portnoy, D. S.; Heist, E. J.						Molecular markers: progress and prospects for understanding reproductive ecology in elasmobranchs						JOURNAL OF FISH BIOLOGY			80	5	SI		1120	1140		10.1111/j.1095-8649.2011.03206.x			2012-04-01	2012	Application of modern molecular tools is expanding the understanding of elasmobranch reproductive ecology. High-resolution molecular markers provide information at scales ranging from the identification of reproductively isolated populations in sympatry (i.e. cryptic species) to the relationships among parents, offspring and siblings. This avenue of study has not only augmented the current unders…						1			1	0022-1112		WOS:000302722800010
J	Fitzpatrick, J. L.; Kempster, R. M.; Daly-Engel, T. S.; Collin, S. P.; Evans, J. P.						Assessing the potential for post-copulatory sexual selection in elasmobranchs						JOURNAL OF FISH BIOLOGY			80	5	SI		1141	1158		10.1111/j.1095-8649.2012.03256.x			2012-04-01	2012	This review highlights the potential role that post-copulatory sexual selection plays in elasmobranch reproductive systems and the utility of this group to further understanding of evolutionary responses to the post-copulatory processes of sperm competition and cryptic female choice. The growing genetic evidence for female multiple mating (polyandry) in elasmobranchs is summarized. While polyandr…						0			0	0022-1112		WOS:000302722800011
J	Irvine, S. B.; Daley, R. K.; Graham, K. J.; Stevens, J. D.						Biological vulnerability of two exploited sharks of the genus Deania (Centrophoridae)						JOURNAL OF FISH BIOLOGY			80	5	SI		1181	1206		10.1111/j.1095-8649.2012.03262.x			2012-04-01	2012	Life-history parameters of Deania calcea and Deania quadrispinosa suggested that their productivity was very low. Maturity (LT50) occurs at c. 80% of maximum observed total lengths (LT) for both species and sexes. A large proportion of mature females were neither pre-ovulatory nor pregnant, and the reproductive cycle included a distinct resting phase after pregnancy. For D. calcea, mean ovarian f…						0			0	0022-1112		WOS:000302722800013
J	Dai, X. J.; Zhu, J. F.; Chen, X. J.; Xu, L. X.; Chen, Y.						Biological observations on the crocodile shark Pseudocarcharias kamoharai						JOURNAL OF FISH BIOLOGY			80	5	SI		1207	1212		10.1111/j.1095-8649.2011.03177.x			2012-04-01	2012	Sex ratios and gravid characteristics were analysed for the crocodile shark Pseudocarcharias kamoharai from the tropical eastern Pacific Ocean. Gravid females ranged from 80 to 102 cm fork length (LF). The mode litter size was four (two embryos per uterus), mean embryo length was linearly correlated with maternal length (r = 0.465, n = 32); there was no significant difference in LF between female…						0			0	0022-1112		WOS:000302722800014
J	Jirik, K. E.; Lowe, C. G.						An elasmobranch maternity ward: female round stingrays Urobatis halleri use warm, restored estuarine habitat during gestation						JOURNAL OF FISH BIOLOGY			80	5	SI		1227	1245		10.1111/j.1095-8649.2011.03208.x			2012-04-01	2012	The habitat use and movements of the round stingray Urobatis halleri were compared between shallow restored and natural habitats of the Anaheim Bay Estuary (CA, U.S.A.) in relation to water temperature. Restored habitat remained significantly warmer than natural habitat from spring through to autumn. Strong sexual segregation occurred in the restored habitat with mature female U. halleri forming …						0			0	0022-1112		WOS:000302722800016
J	Trinnie, F. I.; Walker, T. I.; Jones, P. L.; Laurenson, L. J.						Biennial reproductive cycle in an extensive matrotrophic viviparous batoid: the sandyback stingaree Urolophus bucculentus from south-eastern Australia						JOURNAL OF FISH BIOLOGY			80	5	SI		1267	1291		10.1111/j.1095-8649.2012.03259.x			2012-04-01	2012	Urolophus bucculentus, the largest urolophid species found in southern Australia, exhibits a biennial reproductive cycle. Ovulation occurs during October to January followed by a 1519 month period of gestation followed by parturition during April to May and a short rest period while the ovarian follicles continue to develop for subsequent ovulation. Male breeding condition peaks during April to J…						0			0	0022-1112		WOS:000302722800018
J	Geraghty, P. T.; Jones, A. S.; Stewart, J.; Macbeth, W. G.						Micro-computed tomography: an alternative method for shark ageing						JOURNAL OF FISH BIOLOGY			80	5	SI		1292	1299		10.1111/j.1095-8649.2011.03188.x			2012-04-01	2012	Micro-computed tomography (microCT) produced 3D reconstructions of shark Carcharhinus brevipinna vertebrae that could be virtually sectioned along any desired plane, and upon which growth bands were readily visible. When compared to manual sectioning, it proved to be a valid and repeatable means of ageing and offers several distinct advantages over other ageing methods.						1			1	0022-1112		WOS:000302722800019
J	Hall, N. G.; Bartron, C.; White, W. T.; Dharmadi; Potter, I. C.						Biology of the silky shark Carcharhinus falciformis (Carcharhinidae) in the eastern Indian Ocean, including an approach to estimating age when timing of parturition is not well defined						JOURNAL OF FISH BIOLOGY			80	5	SI		1320	1341		10.1111/j.1095-8649.2012.03240.x			2012-04-01	2012	Biological data were recorded for 1265 silky sharks Carcharhinus falciformis collected from fish landing sites in eastern Indonesia. These represented catches taken in most calendar months by gillnetting and longlining in the eastern Indian Ocean and contained individuals ranging from embryos to fully mature adults. The growth zones in centra, which were shown to form annually, were counted in th…						0			0	0022-1112		WOS:000302722800021
J	Papastamatiou, Y. P.; Lowe, C. G.						An analytical and hypothesis-driven approach to elasmobranch movement studies						JOURNAL OF FISH BIOLOGY			80	5	SI		1342	1360		10.1111/j.1095-8649.2012.03232.x			2012-04-01	2012	The study of elasmobranch movements has increased steadily since the early 1970s. A great deal is now known about the horizontal and vertical movements of many elasmobranch species over multiple spatial and temporal scales. These studies illustrate that many species share certain behaviours such as diel shifts in habitat (both horizontal and vertical), continuous yo-yo bounce diving and in many c…						1			1	0022-1112		WOS:000302722800022
J	Marshall, A. D.; Pierce, S. J.						The use and abuse of photographic identification in sharks and rays						JOURNAL OF FISH BIOLOGY			80	5	SI		1361	1379		10.1111/j.1095-8649.2012.03244.x			2012-04-01	2012	The use of photography to discriminate between individuals in a population using natural markings or aberrations is increasingly being utilized to support field research on elasmobranchs. This non-intrusive method has facilitated investigation of a wide variety of subjects including population composition, abundance estimates, residency and movement, demography and social behaviours. Here the fir…						1			1	0022-1112		WOS:000302722800023
J	Williams, G. D.; Andrews, K. S.; Katz, S. L.; Moser, M. L.; Tolimieri, N.; Farrer, D. A.; Levin, P. S.						Scale and pattern of broadnose sevengill shark Notorynchus cepedianus movement in estuarine embayments						JOURNAL OF FISH BIOLOGY			80	5	SI		1380	1400		10.1111/j.1095-8649.2011.03179.x			2012-04-01	2012	The detailed movements of 32 acoustically tagged broadnose sevengill shark Notorynchus cepedianus were documented in and around north-east Pacific Ocean estuarine embayments from 2005 to 2007. Arrangements of passive acoustic receivers allowed analysis of movement at several spatial scales, with sex and size examined as possible factors influencing the pattern and timing of these movements. Notor…						0			0	0022-1112		WOS:000302722800024
J	Ramirez-Macias, D.; Meekan, M.; de la Parra-Venegas, R.; Remolina-Suarez, F.; Trigo-Mendoza, M.; Vazquez-Juarez, R.						Patterns in composition, abundance and scarring of whale sharks Rhincodon typus near Holbox Island, Mexico						JOURNAL OF FISH BIOLOGY			80	5	SI		1401	1416		10.1111/j.1095-8649.2012.03258.x			2012-04-01	2012	Photo-identification and conventional tagging were used to estimate population size and structure of the whale shark Rhincodon typus near Holbox Island, Mexico. From 2005 to 2008, photographs of spot patterns behind the last gill slit and in a lateral view on the left side of each animal were used to identify individuals. Additionally, 578 R. typus were tagged using conventional marker tags. Of t…						0			0	0022-1112		WOS:000302722800025
J	Awruch, C. A.; Frusher, S. D.; Stevens, J. D.; Barnett, A.						Movement patterns of the draughtboard shark Cephaloscyllium laticeps (Scyliorhinidae) determined by passive tracking and conventional tagging						JOURNAL OF FISH BIOLOGY			80	5	SI		1417	1435		10.1111/j.1095-8649.2012.03249.x			2012-04-01	2012	A combination of passive tracking and conventional tagging was used to provide insight into the movement patterns of the draughtboard shark Cephaloscyllium laticeps, the most common catshark in coastal areas of southern Australia. A series of acoustic receivers deployed throughout south-eastern Tasmania as well as a receiver array along an isolated reef, Crayfish Point Reserve (CPR), passively tr…						0			0	0022-1112		WOS:000302722800026
J	DiGirolamo, A. L.; Gruber, S. H.; Pomory, C.; Bennett, W. A.						Diel temperature patterns of juvenile lemon sharks Negaprion brevirostris, in a shallow-water nursery						JOURNAL OF FISH BIOLOGY			80	5	SI		1436	1448		10.1111/j.1095-8649.2012.03263.x			2012-04-01	2012	The relatively complex pattern of temperature selection exhibited by juvenile lemon sharks Negaprion brevirostris in the North Sound differed markedly from many previously described responses of fish preferenda. Thermal data demonstrated that juvenile N. brevirostris did not attempt to behaviourally maintain a constant eccritic temperature. Rather, juveniles selected progressively warmer temperat…						1			1	0022-1112		WOS:000302722800027
J	Hussey, N. E.; MacNeil, M. A.; Olin, J. A.; McMeans, B. C.; Kinney, M. J.; Chapman, D. D.; Fisk, A. T.						Stable isotopes and elasmobranchs: tissue types, methods, applications and assumptions						JOURNAL OF FISH BIOLOGY			80	5	SI		1449	1484		10.1111/j.1095-8649.2012.03251.x			2012-04-01	2012	Stable-isotope analysis (SIA) can act as a powerful ecological tracer with which to examine diet, trophic position and movement, as well as more complex questions pertaining to community dynamics and feeding strategies or behaviour among aquatic organisms. With major advances in the understanding of the methodological approaches and assumptions of SIA through dedicated experimental work in the br…						1			1	0022-1112		WOS:000302722800028
J	Courtney, D. L.; Foy, R.						Pacific sleeper shark Somniosus pacificus trophic ecology in the eastern North Pacific Ocean inferred from nitrogen and carbon stable-isotope ratios and diet						JOURNAL OF FISH BIOLOGY			80	5	SI		1508	1545		10.1111/j.1095-8649.2012.03261.x			2012-04-01	2012	Stable-isotope ratios of nitrogen (delta N-15) and lipid-normalized carbon (delta C-13') were used to examine geographic and ontogenetic variability in the trophic ecology of a high latitude benthopelagic elasmobranch, the Pacific sleeper shark Somniosus pacificus. Mean muscle tissue delta C-13' values of S. pacificus differed significantly among geographic regions of the eastern North Pacific Oc…						0			0	0022-1112		WOS:000302722800030
J	Forman, J. S.; Dunn, M. R.						Diet and scavenging habits of the smooth skate Dipturus innominatus						JOURNAL OF FISH BIOLOGY			80	5	SI		1546	1562		10.1111/j.1095-8649.2012.03255.x			2012-04-01	2012	The diet of smooth skate Dipturus innominatus was determined from examination of stomach contents of 321 specimens of 29.3152.0 cm pelvic length, sampled from research and commercial trawlers at depths of 231789 m on Chatham Rise, New Zealand. The diet was dominated by the benthic decapods Metanephrops challengeri and Munida gracilis, the natant decapod Campylonotus rathbunae and fishes from 17 f…						0			0	0022-1112		WOS:000302722800031
J	Hsu, H. H.; Joung, S. J.; Liu, K. M.						Fisheries, management and conservation of the whale shark Rhincodon typus in Taiwan						JOURNAL OF FISH BIOLOGY			80	5	SI		1595	1607		10.1111/j.1095-8649.2012.03234.x			2012-04-01	2012	The Taiwanese government introduced a catch-and-report system for the whale shark Rhincodon typus in 2001, and in the following year limited the total allowable catch (TAC) to 80 individuals. This limit was reduced over the following years, reaching a low of 30 individuals in 2007. In November 2007, a comprehensive ban on R. typus fishing came into effect and protection measures were adopted for …						0			0	0022-1112		WOS:000302722800034
J	Li, W.; Wang, Y.; Norman, B.						A preliminary survey of whale shark Rhincodon typus catch and trade in China: an emerging crisis						JOURNAL OF FISH BIOLOGY			80	5	SI		1608	1618		10.1111/j.1095-8649.2012.03250.x			2012-04-01	2012	This study gives an account of spatial and temporal distribution of whale shark Rhincodon typus catch events in China on the basis of historical records and information obtained from interviews with fishing industry stakeholders. A total of 186 R. typus were recorded with key harvest areas identified as in Hainan and Zhejiang, and the peak catching seasons were May to June and September to Octobe…						1			1	0022-1112		WOS:000302722800035
J	Moore, A. B. M.; McCarthy, I. D.; Carvalho, G. R.; Peirce, R.						Species, sex, size and male maturity composition of previously unreported elasmobranch landings in Kuwait, Qatar and Abu Dhabi Emirate						JOURNAL OF FISH BIOLOGY			80	5	SI		1619	1642		10.1111/j.1095-8649.2011.03210.x			2012-04-01	2012	This paper presents data from the first major survey of the diversity, biology and fisheries of elasmobranchs in the Persian (Arabian) Gulf. Substantial landings of elasmobranchs, usually as gillnet by-catch, were recorded in Kuwait, Qatar and the Emirate of Abu Dhabi (part of the United Arab Emirates), although larger elasmobranchs from targeted line fisheries were landed in Abu Dhabi. The elasm…						0			0	0022-1112		WOS:000302722800036
J	Biery, L.; Pauly, D.						A global review of species-specific shark-fin-to-body-mass ratios and relevant legislation						JOURNAL OF FISH BIOLOGY			80	5	SI		1643	1677		10.1111/j.1095-8649.2011.03215.x			2012-04-01	2012	In this review, shark-fin-to-body-mass ratios, which have been legislated by several countries as a means of regulating and monitoring shark fisheries, have been compiled and reviewed. Observed and legislated wet-fin-mass-to-round-mass (Mfw:Mr) ratios have been collected for 50 species and eight countries. Wet to dry-fin mass conversion factors have also been reviewed. Existing shark fishery legi…						1			1	0022-1112		WOS:000302722800037
J	Gallagher, A. J.; Kyne, P. M.; Hammerschlag, N.						Ecological risk assessment and its application to elasmobranch conservation and management						JOURNAL OF FISH BIOLOGY			80	5	SI		1727	1748		10.1111/j.1095-8649.2012.03235.x			2012-04-01	2012	Ecological risk assessments (ERAs) are employed to quantify and predict the vulnerability of a particular species, stock or population to a specific stressor, e.g. pollution, harvesting, climate change, by-catch. Data generated from ERAs are used to identify and prioritize species for implementation of effective conservation and management strategies. At this time, ERAs are of particular importan…						1			1	0022-1112		WOS:000302722800040
J	Carlson, J. K.; Hale, L. F.; Morgan, A.; Burgess, G.						Relative abundance and size of coastal sharks derived from commercial shark longline catch and effort data						JOURNAL OF FISH BIOLOGY			80	5	SI		1749	1764		10.1111/j.1095-8649.2011.03193.x			2012-04-01	2012	In the north-west Atlantic Ocean, stock assessments conducted for some commercially harvested coastal sharks indicate declines from 64 to 80% with respect to virgin population levels. While the status of commercially important species is available, abundance trend information for other coastal shark species in the north-west Atlantic Ocean are unavailable. Using a generalized linear modelling (GL…						0			0	0022-1112		WOS:000302722800041
J	Dudgeon, C. L.; Blower, D. C.; Broderick, D.; Giles, J. L.; Holmes, B. J.; Kashiwagi, T.; Krueuck, N. C.; Morgan, J. A. T.; Tillett, B. J.; Ovenden, J. R.						A review of the application of molecular genetics for fisheries management and conservation of sharks and rays						JOURNAL OF FISH BIOLOGY			80	5	SI		1789	1843		10.1111/j.1095-8649.2012.03265.x			2012-04-01	2012	Since the first investigation 25 years ago, the application of genetic tools to address ecological and evolutionary questions in elasmobranch studies has greatly expanded. Major developments in genetic theory as well as in the availability, cost effectiveness and resolution of genetic markers were instrumental for particularly rapid progress over the last 10 years. Genetic studies of elasmobranch…						1			1	0022-1112		WOS:000302722800043
J	Ward-Paige, C. A.; Keith, D. M.; Worm, B.; Lotze, H. K.						Recovery potential and conservation options for elasmobranchs						JOURNAL OF FISH BIOLOGY			80	5	SI		1844	1869		10.1111/j.1095-8649.2012.03246.x			2012-04-01	2012	Many elasmobranchs have experienced strong population declines, which have been largely attributed to the direct and indirect effects of exploitation. Recently, however, live elasmobranchs are being increasingly valued for their role in marine ecosystems, dive tourism and intrinsic worth. Thus, management plans have been implemented to slow and ultimately reverse negative trends, including shark-…						0			0	0022-1112		WOS:000302722800044
J	Bromhead, D.; Clarke, S.; Hoyle, S.; Muller, B.; Sharples, P.; Harley, S.						Identification of factors influencing shark catch and mortality in the Marshall Islands tuna longline fishery and management implications						JOURNAL OF FISH BIOLOGY			80	5	SI		1870	1894		10.1111/j.1095-8649.2012.03238.x			2012-04-01	2012	Recent average annual catches of sharks by tuna longline vessels fishing in the Republic of the Marshall Islands (RMI) are estimated to be between 1583 and 2274 t. Although 22 shark species have been recorded by the observer programme for this fishery, 80% of the annual catch comprises only five species: blue shark Prionace glauca, silky shark Carcharhinus falciformis, bigeye thresher shark Alopi…						0			0	0022-1112		WOS:000302722800045
J	Santana-Garcon, J.; Fordham, S.; Fowler, S.						Blue shark Prionace glauca fin-to-carcass-mass ratios in Spain and implications for finning ban enforcement						JOURNAL OF FISH BIOLOGY			80	5	SI		1895	1903		10.1111/j.1095-8649.2012.03233.x			2012-04-01	2012	This study examines the processing of fins from blue sharks Prionace glauca caught by the Spanish longline fleet and landed in Vigo, Spain, and implications of these practices for enforcing the E.U. ban on shark finning, which relies on a maximum fin-to-carcass-mass ratio. Two major sources of variability in fin-to-carcass ratios are quantified and discussed: (1) the fin set (type and number of f…						0			0	0022-1112		WOS:000302722800046
J	Shadwick, R. E.; Goldbogen, J. A.						Muscle function and swimming in sharks						JOURNAL OF FISH BIOLOGY			80	5	SI		1904	1939		10.1111/j.1095-8649.2012.03266.x			2012-04-01	2012	The locomotor system in sharks has been investigated for many decades, starting with the earliest kinematic studies by Sir James Gray in the 1930s. Early work on axial muscle anatomy also included sharks, and the first demonstration of the functional significance of red and white muscle fibre types was made on spinal preparations in sharks. Nevertheless, studies on teleosts dominate the literatur…						1			1	0022-1112		WOS:000302722800047
J	Meyer, W.; Seegers, U.						Basics of skin structure and function in elasmobranchs: a review						JOURNAL OF FISH BIOLOGY			80	5	SI		1940	1967		10.1111/j.1095-8649.2011.03207.x			2012-04-01	2012	In contrast to the bony fishes, particularly the teleosts, the integument of elasmobranchs is rather unknown. Therefore, a description of the basic structural and functional features of shark and ray skin is given, based on a review of the literature and published or unpublished findings of the authors. The latter aspect makes it possible to document in more detail the specific structure of the s…						1			1	0022-1112		WOS:000302722800048
J	Yopak, K. E.						Neuroecology of cartilaginous fishes: the functional implications of brain scaling						JOURNAL OF FISH BIOLOGY			80	5	SI		1968	2023		10.1111/j.1095-8649.2012.03254.x			2012-04-01	2012	It is a widely accepted view that neural development can reflect morphological adaptations and sensory specializations. The aim of this review is to give a broad overview of the current status of brain data available for cartilaginous fishes and examine how perspectives on allometric scaling of brain size across this group of fishes has changed within the last 50 years with the addition of new da…						1			1	0022-1112		WOS:000302722800049
J	Lisney, T. J.; Theiss, S. M.; Collin, S. P.; Hart, N. S.						Vision in elasmobranchs and their relatives: 21st century advances						JOURNAL OF FISH BIOLOGY			80	5	SI		2024	2054		10.1111/j.1095-8649.2012.03253.x			2012-04-01	2012	This review identifies a number of exciting new developments in the understanding of vision in cartilaginous fishes that have been made since the turn of the century. These include the results of studies on various aspects of the visual system including eye size, visual fields, eye design and the optical system, retinal topography and spatial resolving power, visual pigments, spectral sensitivity…						1			1	0022-1112		WOS:000302722800050
J	Kempster, R. M.; McCarthy, I. D.; Collin, S. P.						Phylogenetic and ecological factors influencing the number and distribution of electroreceptors in elasmobranchs						JOURNAL OF FISH BIOLOGY			80	5	SI		2055	2088		10.1111/j.1095-8649.2011.03214.x			2012-04-01	2012	Electroreception is found throughout the animal kingdom from invertebrates to mammals and has been shown to play an important role in prey detection, facilitating social behaviours, the detection of predators and orientation to the earth's magnetic field for navigation. Electroreceptors in elasmobranchs, the ampullae of Lorenzini, detect minute electric fields and independently process these stim…						1			1	0022-1112		WOS:000302722800051
J	Barnes, D. W.						Cell and molecular biology of the spiny dogfish Squalus acanthias and little skate Leucoraja erinacea: insights from in vitro cultured cells						JOURNAL OF FISH BIOLOGY			80	5	SI		2089	2111		10.1111/j.1095-8649.2011.03205.x			2012-04-01	2012	Two of the most commonly used elasmobranch experimental model species are the spiny dogfish Squalus acanthias and the little skate Leucoraja erinacea. Comparative biology and genomics with these species have provided useful information in physiology, pharmacology, toxicology, immunology, evolutionary developmental biology and genetics. A wealth of information has been obtained using in vitro appr…						0			0	0022-1112		WOS:000302722800052
J	Haman, Katherine H.; Norton, Terry M.; Thomas, Austen C.; Dove, Alistair D. M.; Tseng, Florina						BASELINE HEALTH PARAMETERS AND SPECIES COMPARISONS AMONG FREE-RANGING ATLANTIC SHARPNOSE (RHIZOPRIONODON TERRAENOVAE), BONNETHEAD (SPHYRNA TIBURO), AND SPINY DOGFISH (SQUALUS ACANTHIAS) SHARKS IN GEORGIA, FLORIDA, AND WASHINGTON, USA						JOURNAL OF WILDLIFE DISEASES			48	2			295	306					2012-04-01	2012	Sharks are of commercial, research, conservation, and exhibition importance but we know little regarding health parameters and population status for many species. Here we present health indicators and species comparisons for adults of three common wild-caught species: 30 Atlantic sharpnose sharks (Rhizoprionodon terraenovae) and 31 bonnethead sharks (Sphyrna tiburo) from the western Atlantic, and…						0			0	0090-3558		WOS:000302589000004
J	Winship, Arliss J.; Jorgensen, Salvador J.; Shaffer, Scott A.; Jonsen, Ian D.; Robinson, Patrick W.; Costa, Daniel P.; Block, Barbara A.						State-space framework for estimating measurement error from double-tagging telemetry experiments						METHODS IN ECOLOGY AND EVOLUTION			3	2			291	302		10.1111/j.2041-210X.2011.00161.x			2012-04-01	2012	1. Double-tagging experiments are invaluable for determining the accuracy and precision of location data provided by different telemetry technologies used with free-ranging animals. 2. We developed a state-space modelling framework for estimating the precision of telemetry location data based on double-tagging experiments. The model is simultaneously fitted to multiple data types with different t…						0			0	2041-210X		WOS:000302538500009
J	Thomson, Jordan A.; Cooper, Andrew B.; Burkholder, Derek A.; Heithaus, Michael R.; Dill, Lawrence M.						Heterogeneous patterns of availability for detection during visual surveys: spatiotemporal variation in sea turtle dive-surfacing behaviour on a feeding ground						METHODS IN ECOLOGY AND EVOLUTION			3	2			378	387		10.1111/j.2041-210X.2011.00163.x			2012-04-01	2012	1. During aerial or boat-based surveys for large-bodied diving taxa (e.g. marine mammals and marine turtles), a proportion of animals present will be missed because they are submerged and out of view, leading to availability bias in abundance indices. Information on divesurfacing patterns can improve corrections for availability bias. However, as dive data are typically limited, availability corr…						0			0	2041-210X		WOS:000302538500018
J	Lu, Shuangshuang; Yao, Shugang; Chen, Rong; Zhang, Nianzhi; Chen, Jianmin; Gao, Feng; Xia, Chun						Expression, purification, crystallization and preliminary X-ray diffraction analysis of nurse shark beta(2)-microglobulin			Part 4			ACTA CRYSTALLOGRAPHICA SECTION F-STRUCTURAL BIOLOGY AND CRYSTALLIZATION COMMUNICATIONS			68				460	463		10.1107/S1744309112006811			2012-04-01	2012	beta(2)-Microglobulin (beta(2)m) is an essential subunit of the major histocompatibility complex (MHC) class I molecule that helps to stabilize the structure of peptide-MHC I (pMHC I). It is also one of the typical immunoglobulin superfamily (IgSF) molecules in the adaptive immune system (AIS). Sharks belong to the cartilaginous fish, which are the oldest jawed vertebrate ancestors with an AIS to…						0			0	1744-3091		WOS:000302457900022
J	de Carvalho, Marcelo R.; Faro, Caio; Gomes, Ulisses L.						Comparative neurocranial morphology of angelsharks from the south-western Atlantic Ocean (Chondrichthyes, Elasmobranchii, Squatinidae): implications for taxonomy and phylogeny						ACTA ZOOLOGICA			93	2			171	183		10.1111/j.1463-6395.2010.00495.x			2012-04-01	2012	Neurocrania of three species of angelsharks from the south-western Atlantic Ocean, occurring off south-eastern and southern Brazil, are described. A detailed morphological description is provided of the neurocranium of Squatina guggenheim and compared with S. argentina and S. occulta. Despite being generally conservative, the neurocranium of Squatina presents significant differences among these s…						0			0	7272-01-01		WOS:000301484700004
J	Guven, O.; Kebapcioglu, T.; Deval, M. C.						Length-weight relationships of sharks in Antalya Bay, eastern Mediterranean						JOURNAL OF APPLIED ICHTHYOLOGY			28	2			278	279		10.1111/j.1439-0426.2011.01823.x			2012-04-01	2012	Lengthweight relationships are presented for ten shark species caught in the demersal trawl fishery in the Antalya Bay, eastern Mediterranean.						0			0	0175-8659		WOS:000301051400022
J	Knip, D. M.; Heupel, M. R.; Simpfendorfer, C. A.						Habitat use and spatial segregation of adult spottail sharks Carcharhinus sorrah in tropical nearshore waters						JOURNAL OF FISH BIOLOGY			80	4			767	784		10.1111/j.1095-8649.2012.03223.x			2012-04-01	2012	An array of acoustic receivers deployed in Cleveland Bay, north Queensland, Australia, passively tracked 20 adult spottail sharks Carcharhinus sorrah over 2 years (20092010) to define patterns in movement and habitat use. Individuals were present in the study site for long periods, ranging from 8 to 408 days (mean = 185). Size and location of home ranges did not vary over time. A high level of se…						0			0	0022-1112		WOS:000302289200004
J	Ansari, Mahmoud; Hatzikiriakos, Savvas G.; Sukhadia, Ashish M.; Rohlfing, David C.						Melt Fracture of Two Broad Molecular Weight Distribution High-Density Polyethylenes						POLYMER ENGINEERING AND SCIENCE			52	4			795	804		10.1002/pen.22144			2012-04-01	2012	The melt fracture instabilities of two broad molecular weight distribution (MWD) high-density polyethylenes (one Ziegler-Natta and one metallocene HDPEs) are studied as functions of the temperature and geometrical details and type of die (cylindrical, slit, and annular). It is found that sharkskin and other melt fracture phenomena are distinctly different for these resins, despite their almost id…						1			1	0032-3888		WOS:000301539300011
J	Smith, Lauren E.; Crouch, Kathryn; Cao, Wei; Mueller, Mischa R.; Wu, Leeying; Steven, John; Lee, Michael; Liang, Musen; Flajnik, Martin F.; Shih, Heather H.; Barelle, Caroline J.; Paulsen, Janet; Gill, Davinder S.; Dooley, Helen						Characterization of the immunoglobulin repertoire of the spiny dogfish (Squalus acanthias)						DEVELOPMENTAL AND COMPARATIVE IMMUNOLOGY			36	4			665	679		10.1016/j.dci.2011.10.007			2012-04-01	2012	The cartilaginous fish (chimeras, sharks, skates and rays) are the oldest group relative to mammals in which an adaptive immune system founded upon immunoglobulins has been found. In this manuscript we characterize the immunoglobulins of the spiny dogfish (Squalus acanthias) at both the molecular and expressed protein levels. Despite the presence of hundreds of IgM clusters in this species the se…						0			0	0145-305X		WOS:000302277700005
J	Li, Ronggai; Dooley, Helen; Wang, Tiehui; Secombes, Christopher J.; Bird, Steve						Characterisation and expression analysis of B-cell activating factor (BAFF) in spiny dogfish (Squalus acanthias): Cartilaginous fish BAFF has a unique extra exon that may impact receptor binding						DEVELOPMENTAL AND COMPARATIVE IMMUNOLOGY			36	4			707	717		10.1016/j.dci.2011.11.010			2012-04-01	2012	B-cell activating factor (BAFF), also known as tumour necrosis factor (TNF) ligand superfamily member 13B, is an important immune regulator with critical roles in B-cell survival, proliferation, differentiation and immunoglobulin secretion. A BAFF gene has been cloned from spiny dogfish (Squalus acanthias) and its expression studied. The dogfish BAFF encodes for an anchored type-II transmembrane …						0			0	0145-305X		WOS:000302277700009
J	Zhang, X. L.; Lu, Y. S.; Jian, J. C.; Wu, Z. H.						Cloning and expression analysis of recombination activating genes (RAG1/2) in red snapper (Lutjanus sanguineus)						FISH & SHELLFISH IMMUNOLOGY			32	4			534	543		10.1016/j.fsi.2012.01.001			2012-04-01	2012	Recombination activating genes (RAG1 and RAG2), involved in the V(D)J recombination of immunoglobulin and T-cell receptor genes play a crucial role in the adaptive immune response in vertebrates. The expression of these genes was required for the proper development and maturity of lymphocytes so that they can be used as useful markers to evaluate the development of lymphoid organ. In this paper, …						0			0	1050-4648		WOS:000301827100004
J	Maeso, Ignacio; Irimia, Manuel; Tena, Juan J.; Gonzalez-Perez, Esther; Tran, David; Ravi, Vydianathan; Venkatesh, Byrappa; Campuzano, Sonsoles; Luis Gomez-Skarmeta, Jose; Garcia-Fernandez, Jordi						An ancient genomic regulatory block conserved across bilaterians and its dismantling in tetrapods by retrogene replacement						GENOME RESEARCH			22	4			642	655		10.1101/gr.132233.111			2012-04-01	2012	Developmental genes are regulated by complex, distantly located cis-regulatory modules (CRMs), often forming genomic regulatory blocks (GRBs) that are conserved among vertebrates and among insects. We have investigated GRBs associated with Iroquois homeobox genes in 39 metazoans. Despite 600 million years of independent evolution, Iroquois genes are linked to ankyrin-repeat-containing Sowah genes…						1			1	1088-9051		WOS:000302203800006
J	Burns, Brendan P.; Gudhka, Reema K.; Neilan, Brett A.						Genome Sequence of the Halophilic Archaeon Halococcus hamelinensis						JOURNAL OF BACTERIOLOGY			194	8			2100	2101		10.1128/JB.06599-11			2012-04-01	2012	Halococcus hamelinensis was isolated from hypersaline stromatolites in Shark Bay, Australia. Here we report the genome sequence (3,133,046 bp) of H. hamelinensis, which provides insights into the ecology, evolution, and adaptation of this novel microorganism.						0			0	0021-9193		WOS:000302180200030
J	Byrne, Rosemary J.; Avise, John C.						Genetic mating system of the brown smoothhound shark (Mustelus henlei), including a literature review of multiple paternity in other elasmobranch species						MARINE BIOLOGY			159	4			749	756		10.1007/s00227-011-1851-z			2012-04-01	2012	Although an understanding of mating systems is thought to be an important component of long-term population management, these life history characteristics are poorly known in sharks. Here, we employ polymorphic microsatellite markers to test for the occurrence and prevalence of multiple paternity in a population of the brown smoothhound shark, Mustelus henlei. We analyzed litters from 14 females …						0			0	0025-3162		WOS:000301845900004
J	Andrews, Kelly S.; Quinn, Thomas P.						Combining fishing and acoustic monitoring data to evaluate the distribution and movements of spotted ratfish Hydrolagus colliei						MARINE BIOLOGY			159	4			769	782		10.1007/s00227-011-1853-x			2012-04-01	2012	Direct and indirect methods have been used to describe patterns of movement of fishes, but few studies have compared these methods simultaneously. We used 20 years of trawl survey data and 1 year of acoustic telemetry data to evaluate the vertical and horizontal movement patterns of spotted ratfish Hydrolagus colliei in Puget Sound, WA, USA. Densities of large ratfish (a parts per thousand yen30 …						0			0	0025-3162		WOS:000301845900006
J	Pinhal, D.; Shivji, M. S.; Vallinoto, M.; Chapman, D. D.; Gadig, O. B. F.; Martins, C.						Cryptic hammerhead shark lineage occurrence in the western South Atlantic revealed by DNA analysis						MARINE BIOLOGY			159	4			829	836		10.1007/s00227-011-1858-5			2012-04-01	2012	A cryptic lineage of hammerhead shark closely related to but evolutionarily distinct from the scalloped hammerhead (Sphyrna lewini) was recently documented in the western North Atlantic Ocean. Here, we demonstrate using nuclear and mitochondrial DNA sequences that this cryptic lineage also occurs in the western South Atlantic Ocean, extending its distribution > 7,000 km from its only previously r…						0			0	0025-3162		WOS:000301845900011
J	Aschliman, Neil C.; Nishida, Mutsumi; Miya, Masaki; Inoue, Jun G.; Rosana, Kerri M.; Naylor, Gavin J. P.						Body plan convergence in the evolution of skates and rays (Chondrichthyes: Batoidea)						MOLECULAR PHYLOGENETICS AND EVOLUTION			63	1			28	42		10.1016/j.ympev.2011.12.012			2012-04-01	2012	Skates, rays and allies (Batoidea) comprise more than half of the species diversity and much of the morphological disparity among chondrichthyan fishes, the sister group to all other jawed vertebrates. While batoids are morphologically well characterized and have an excellent fossil record, there is currently no consensus on the interrelationships of family-level taxa. Here we construct a resolve…						0			0	1055-7903		WOS:000301473100003
J	Takagi, Wataru; Kajimura, Makiko; Bell, Justin D.; Toop, Tes; Donald, John A.; Hyodo, Susumu						Hepatic and extrahepatic distribution of ornithine urea cycle enzymes in holocephalan elephant fish (Callorhinchus milii)						COMPARATIVE BIOCHEMISTRY AND PHYSIOLOGY B-BIOCHEMISTRY & MOLECULAR BIOLOGY			161	4			331	340		10.1016/j.cbpb.2011.12.006			2012-04-01	2012	Cartilaginous fish comprise two subclasses, the Holocephali (chimaeras) and Elasmobranchii (sharks, skates and rays). Little is known about osmoregulatory mechanisms in holocephalan fishes except that they conduct urea-based osmoregulation, as in elasmobranchs. In the present study, we examined the ornithine urea cycle (OUC) enzymes that play a role in urea biosynthesis in the holocephalan elepha…						0			0	1096-4959		WOS:000301609300005
J	Jackson, G.; Cheng, Y. W.; Wakefield, C. B.						An evaluation of the daily egg production method to estimate spawning biomass of snapper (Pagrus auratus) in inner Shark Bay, Western Australia, following more than a decade of surveys 1997-2007						FISHERIES RESEARCH			117		SI		22	34		10.1016/j.fishres.2010.12.009			2012-04-01	2012	The daily egg production method (DEPM) has been used to estimate spawning biomass of separate stocks of snapper (Pagrus auratus) in the inner gulfs of Shark Bay, Western Australia, since 1997. While these stocks have been targeted by a regionally important recreational fishery since at least the 1970s, no information on stock size was available prior to this application of the DEPM. Ichthyoplankt…						3			3	0165-7836		WOS:000301387200004
J	Fiedler, Fernando N.; Sales, Gilberto; Giffoni, Bruno B.; Monteiro-Filho, Emygdio L. A.; Secchi, Eduardo R.; Bugoni, Leandro						Driftnet fishery threats sea turtles in the Atlantic Ocean						BIODIVERSITY AND CONSERVATION			21	4			915	931		10.1007/s10531-012-0227-0			2012-04-01	2012	Fisheries are recognised as a major threat to sea turtles worldwide. Oceanic driftnets are considered the main cause of the steep decline in Pacific Ocean populations of the leatherback sea turtle Dermochelys coriacea. The world's largest leatherback population nests in West Africa and migrates across the Atlantic Ocean to feed off the South American coast. There, the turtles encounter a range of…						0			0	0960-3115		WOS:000301178500003
J	Cuny, Gilles; Martin, Jeremy E.; Sarr, Raphael						A neoselachian shark fauna from the Late Cretaceous of Senegal						CRETACEOUS RESEARCH			34				107	115		10.1016/j.cretres.2011.10.008			2012-04-01	2012	A selachian fauna is described for the first time from the Late Cretaceous (Campanian-Maastrichtian) of Senegal. So far, the Campanian Paki Formation has only yielded a single tooth of Rhombodus sp. whereas the Cap de Naze Formation has yielded a more diverse fauna including juvenile Cretalamna cf. Cretalamna biauriculata, Serratolamna serrata, Carcharias cf. Carcharias heathi, ?Carcharias sp., S…						0			0	0195-6671		WOS:000301027200009
J	Schieber, Nicole L.; Collin, Shaun P.; Hart, Nathan S.						Comparative retinal anatomy in four species of elasmobranch						JOURNAL OF MORPHOLOGY			273	4			423	440		10.1002/jmor.11033			2012-04-01	2012	Using both light and transmission electron microscopy, we examined the retinal anatomy of four elasmobranch species with differing ecologies: the bull shark Carcharhinus leucas, Port Jackson shark Heterodontus portusjacksoni, epaulette shark Hemiscyllium ocellatum and pink whipray Himantura fai. Their retinas are typical of other vertebrates, having three nuclear and two synaptic layers, but are …						1			1	0362-2525		WOS:000300875800005
J	Kitchen-Wheeler, Anne-Marie; Ari, Csilla; Edwards, Alasdair J.						Population estimates of Alfred mantas (Manta alfredi) in central Maldives atolls: North Male, Ari and Baa						ENVIRONMENTAL BIOLOGY OF FISHES			93	4			557	575		10.1007/s10641-011-9950-8			2012-04-01	2012	The Alfred manta, Manta alfredi, is economically important in the Maldives due to the large number of tourists attracted to SCUBA dive and snorkel with them. It is important to understand the size of populations around main diving points and throughout the Maldives so that manta based tourism activities can be developed more successfully and the impact of tourism can be monitored. Using natural m…						0			0	0378-1909		WOS:000300525500010
J	Pietsch, Theodore W.; Orr, James Wilder; Eschmeyer, William N.						Mustelus felis Ayres, 1854, a Senior Synonym of the Leopard Shark, Triakis semifasciata Girard, 1855 (Carchariniformes: Triakidae), Invalidated by "Reversal of Precedence"						COPEIA				1			98	99		10.1643/CI-11-089			MAR 30 2012	2012	Mustelus fells Ayres, 1854, is shown to be a senior synonym of the triakid shark Triakis semifasciata Girard, 1855. Conditions exist, however, to allow "reversal of precedence" of the two names, as provided by Article 23.9.1 of the International Code of Zoological Nomenclature. Thus, Triakis semifasciata Girard, 1855, is regarded as valid, qualifying as a nomen protectum, while the name Mustelus …						0			0	0045-8511		WOS:000302424100008
J	Nahrendorf, Matthias; McCarthy, Jason R.; Libby, Peter						Over a Hump for Imaging Atherosclerosis Nanobodies Visualize Vascular Cell Adhesion Molecule-1 in Inflamed Plaque						CIRCULATION RESEARCH			110	7			902	903		10.1161/CIRCRESAHA.112.267260			MAR 30 2012	2012							0			0	7330-09-01		WOS:000302219900003
J	Cardona, Luis; Alvarez de Quevedo, Irene; Borrell, Assumpcio; Aguilar, Alex						Massive Consumption of Gelatinous Plankton by Mediterranean Apex Predators						PLOS ONE			7	3					e31329	10.1371/journal.pone.0031329			MAR 21 2012	2012	Stable isotopes of carbon and nitrogen were used to test the hypothesis that stomach content analysis has systematically overlooked the consumption of gelatinous zooplankton by pelagic mesopredators and apex predators. The results strongly supported a major role of gelatinous plankton in the diet of bluefin tuna (Thunnus thynnus), little tunny (Euthynnus alletteratus), spearfish (Tetrapturus belo…						0			0	1932-6203		WOS:000303857100003
J	White, William T.						A redescription of Carcharhinus dussumieri and C. sealei, with resurrection of C. coatesi and C. tjutjot as valid species (Chondrichthyes: Carcharhinidae)						ZOOTAXA				3241			1	34					MAR 21 2012	2012	A taxonomic re-evaluation of the Carcharhinus sealei-dussumieri group using meristic and morphological data revealed that this group consists of 5 species. Two species, Carcharhinus coatesi (Whitley, 1939) from northern Australia and probably New Guinea and C. tjutjot (Bleeker, 1852) from Indonesian to Taiwan, are resurrected as valid species and together with C. dussumieri and C. sealei are rede…						0			0	1175-5326		WOS:000303813300001
J	Yufera, Manuel; Moyano, Francisco J.; Astola, Antonio; Pousao-Ferreira, Pedro; Martinez-Rodriguez, Gonzalo						Acidic Digestion in a Teleost: Postprandial and Circadian Pattern of Gastric pH, Pepsin Activity, and Pepsinogen and Proton Pump mRNAs Expression						PLOS ONE			7	3					e33687	10.1371/journal.pone.0033687			MAR 20 2012	2012	Two different modes for regulation of stomach acid secretion have been described in vertebrates. Some species exhibit a continuous acid secretion maintaining a low gastric pH during fasting. Others, as some teleosts, maintain a neutral gastric pH during fasting while the hydrochloric acid is released only after the ingestion of a meal. Those different patterns seem to be closely related to specif…						0			0	1932-6203		WOS:000303855700057
J	Belaustegui, Zain; de Gibert, Jordi M.; Domenech, Rosa; Muniz, Fernando; Martinell, Jordi						Clavate borings in a Miocene cetacean skeleton from Tarragona (NE Spain) and the fossil record of marine bone bioerosion						PALAEOGEOGRAPHY PALAEOCLIMATOLOGY PALAEOECOLOGY			323				68	74		10.1016/j.palaeo.2012.01.031			MAR 15 2012	2012	Clavate borings found in the tympanic bulla of a Miocene cetacean from El Camp de Tarragona Basin constitute the first evidence of the ichnogenus Gastrochaenolites in bones of an autochthonous cetacean carcass. Previous records of similar trace fossils on marine bones were described from transported or reworked remains. Based on their morphology and ichnotaxonomy, the borings are assigned to the …						0			0	0031-0182		WOS:000302524000006
J	Timm, L. L.; Fish, F. E.						A comparative morphological study of head shape and olfactory cavities of sharks inhabiting benthic and coastal/pelagic environments						JOURNAL OF EXPERIMENTAL MARINE BIOLOGY AND ECOLOGY			414				75	84		10.1016/j.jembe.2012.01.016			MAR 15 2012	2012	There is great diversity in head shape and olfactory morphology among shark species, which is predicted to be related to habitat. As sharks swim forward water flows into the incurrent nostril placing dissolved chemicals into direct contact with the olfactory epithelium, before exiting the excurrent nostril. The nostrils exhibit diversity in form, size, and position on the rostrum among species. V…						0			0	0022-0981		WOS:000302502500010
J	Farquharson, Charon; Smit, Nico J.; Grutter, Alexandra S.; Davies, Angela J.						Gnathia masca sp nov (Crustacea, Isopoda, Gnathiidae) from Lizard Island, Great Barrier Reef, Australia						ZOOTAXA				3233			22	36					MAR 14 2012	2012	Gnathia masca sp. nov. is described from material collected off Coconut Beach, Lizard Island, Great Barrier Reef, Australia. Males are characterised by a cephalosome with a shallow dorsal sulcus that stretches half its length, a slightly produced frontal border with two conical superior fronto-lateral processes and a conical inferior medio-frontal process. Male mandibles have 6 processes on the d…						0			0	1175-5326		WOS:000303809200002
J	Cisneros-Montemayor, Andres M.; Christensen, Villy; Arreguin-Sanchez, Francisco; Sumaila, U. Rashid						Ecosystem models for management advice: An analysis of recreational and commercial fisheries policies in Baja California Sur, Mexico						ECOLOGICAL MODELLING			228				8	16		10.1016/j.ecolmodel.2011.12.021			MAR 10 2012	2012	Recreational fishing is a vital component of the tourism economy in Baja California Sur (BCS), Mexico, although several artisanal and industrial fisheries continue to operate in the region. The commercial long-liner fleet in particular is widely held to be responsible both for diminishing shark populations and declines in billfish through bycatch. Using available fisheries and ecosystem data, we …						0			0	0304-3800		WOS:000301317500002
J	Bond, Mark E.; Babcock, Elizabeth A.; Pikitch, Ellen K.; Abercrombie, Debra L.; Lamb, Norlan F.; Chapman, Demian D.						Reef Sharks Exhibit Site-Fidelity and Higher Relative Abundance in Marine Reserves on the Mesoamerican Barrier Reef						PLOS ONE			7	3					e32983	10.1371/journal.pone.0032983			MAR 8 2012	2012	Carcharhinid sharks can make up a large fraction of the top predators inhabiting tropical marine ecosystems and have declined in many regions due to intense fishing pressure. There is some support for the hypothesis that carcharhinid species that complete their life-cycle within coral reef ecosystems, hereafter referred to as "reef sharks'', are more abundant inside no-take marine reserves due to…						0			0	1932-6203		WOS:000303062000024
J	Friedman, Matt						Parallel evolutionary trajectories underlie the origin of giant suspension-feeding whales and bony fishes						PROCEEDINGS OF THE ROYAL SOCIETY B-BIOLOGICAL SCIENCES			279	1730			944	951		10.1098/rspb.2011.1381			MAR 7 2012	2012	Giant suspension feeders such as mysticete whales, basking and whale sharks, and the extinct (indicated by 'dagger') t pachycormiform teleosts are conspicuous members of modern and fossil marine vertebrate faunas. Whether convergent anatomical features common to these clades arose along similar evolutionary pathways has remained unclear because of a lack of information surrounding the origins of …						0			0	0962-8452		WOS:000299910400015
J	Walper, Scott A.; Anderson, George P.; Lee, P. Audrey Brozozog; Glaven, Richard H.; Liu, Jinny L.; Bernstein, Rachel D.; Zabetakis, Dan; Johnson, Linwood; Czarnecki, Jill M.; Goldman, Ellen R.						Rugged Single Domain Antibody Detection Elements for Bacillus anthracis Spores and Vegetative Cells						PLOS ONE			7	3					e32801	10.1371/journal.pone.0032801			MAR 6 2012	2012	Significant efforts to develop both laboratory and field-based detection assays for an array of potential biological threats started well before the anthrax attacks of 2001 and have continued with renewed urgency following. While numerous assays and methods have been explored that are suitable for laboratory utilization, detection in the field is often complicated by requirements for functionalit…						0			0	1932-6203		WOS:000303021100031
J	Luis Cione, Alberto; Alfredo Cabrera, Daniel; Julia Barla, Maria						Oldest record of the Great White Shark (Lamnidae, Carcharodon; Miocene) in the Southern Atlantic						GEOBIOS			45	2			167	172					MAR-APR 2012	2012	Lamnid teeth close to but more plesiomorph than Carcharodon carcharias were collected in the late Miocene beds of the Parana Formation in the central eastern Argentina. We propose, as other authors, that some species formerly assigned to Isurus or to Cosmopolitodus should be included in Carcharodon. Some workers suggested that C. carcharias originated by phyletic evolution in the Pacific basin. T…						0			0	0016-6995		CCC:000304516500002
J	Ferrando, Sara; Gallus, Lorenzo; Gambardella, Chiara; Amaroli, Andrea; Cutolo, Alessia; Masini, Maria Angela; Vallarino, Mauro; Vacchi, Marino						Neuronal nitric oxide synthase (nNOS) immunoreactivity in the olfactory system of a cartilaginous fish						JOURNAL OF CHEMICAL NEUROANATOMY			43	2			133	140					2012-03-01	2012	Nitric oxide is a regulative molecule with important roles in the olfactory system of vertebrates. Chondrichtyans have a key position in vertebrate evolution and nothing is known about nitric oxide in their olfactory system. Aim of this work was to investigate the neuronal nitric oxide synthase (nNOS) immunoreactivity in the olfactory system of the shark Scyliorhinus canicula. Because nitric oxid…						0			0	0891-0618		CCC:000304513200006
J	Moore, Alec B. M.						Elasmobranchs of the Persian (Arabian) Gulf: ecology, human aspects and research priorities for their improved management						REVIEWS IN FISH BIOLOGY AND FISHERIES			22	1			35	61		10.1007/s11160-011-9222-x			2012-03-01	2012	Given widespread concern about the status of elasmobranch fishes globally, information on this group in the Persian (Arabian) Gulf is reviewed comprehensively for the first time. The Arabian region may be of overlooked significance to elasmobranch biogeography, and the environmentally unique Gulf has some highly distinctive elements of biodiversity: an endemic and critically endangered rajid skat…						1			1	0960-3166		WOS:000303895100005
J	Otway, Nick; Ellis, Megan						Construction and Test of an Artificial Uterus for Ex Situ Development of Shark Embryos						ZOO BIOLOGY			31	2			197	205		10.1002/zoo.20422			MAR-APR 2012	2012	An artificial uterus (AU) was constructed from clear and opaque acrylic and life-support and monitoring systems were attached. The dwarf ornate wobbegong shark (Orectolobus ornatus) was used to test the AU because recent research has shown that during pregnancy the uterine fluid composition changes with mid- to late-term embryos immersed in seawater. An artificial uterine fluid comprising filtere…						0			0	0733-3188		WOS:000303196300007
J	Ferreiro-Galve, Susana; Candal, Eva; Rodriguez-Moldes, Isabel						Dynamic expression of Pax6 in the shark olfactory system: evidence for the presence of Pax6 cells along the olfactory nerve pathway						JOURNAL OF EXPERIMENTAL ZOOLOGY PART B-MOLECULAR AND DEVELOPMENTAL EVOLUTION			318B	2			79	90		10.1002/jezb.21444			2012-03-01	2012	Pax6 is involved in the control of neuronal specification, migration, and differentiation in the olfactory epithelium and in the generation of different interneuron subtypes in the olfactory bulb. Whether these roles are conserved during evolution is not known. Cartilaginous fish are extremely useful models for assessing the ancestral condition of brain organization because of their phylogenetic …						0			0	1552-5007		WOS:000303157100001
J	Ferreiro-Galve, Susana; Rodriguez-Moldes, Isabel; Candal, Eva						Pax6 expression during retinogenesis in sharks: comparison with markers of cell proliferation and neuronal differentiation						JOURNAL OF EXPERIMENTAL ZOOLOGY PART B-MOLECULAR AND DEVELOPMENTAL EVOLUTION			318B	2			91	108		10.1002/jezb.21448			2012-03-01	2012	Pax6 is a highly conserved transcription factor that appears involved in the entire process of retinogenesis, including maintenance of proliferation of retinal progenitors and differentiation of particular neuron fates. To gain insight into the retinogenesis in fish, we study the dynamics of Pax6 expression in the developing and mature retina of two sharks that inhabit in particular environments,…						0			0	1552-5007		WOS:000303157100002
J	Morais, R. A.; Longo, G. O.; Santos, R. A.; Yoshida, E. T. E.; Stahelin, G. D.; Horta, P. A.						Cephalopod Ingestion by Juvenile Green Sea Turtles (Chelonia mydas): Predatory or Scavenging Behavior?						Herpetological Review			43	1			47	50					2012-03-01	2012							0			0	0018-084X		BCI:BCI201200359866
J	Lavaniegos, B. E.; Heckel, G.; de Guevara P, P. Ladron						Seasonal variability of copepods and cladocerans in Bahia de los Angeles (Gulf of California) and importance of Acartia clausi as food for whale sharks						CIENCIAS MARINAS			38	1A			11	30					2012-03-01	2012	Bahia de los Angeles is located on the Baja Californian coast of the Gulf of California, adjacent to Ballenas Channel. The bay receives a dynamic tidal influence from the channel but is protected by numerous islands. It is a highly productive bay that harbors a high diversity of species, some of them protected such as the whale shark (Rhincodon typus). This study describes the seasonal variabilit…						0			0	0185-3880		WOS:000302487200002
J	Gasparoli, A.; Mariani, C.; Gaboardi, M. E.; Morchio, G.; Santus, G.						About detection of animal Squalene/Squalane in vegetable products used in the cosmetic field						RIVISTA ITALIANA DELLE SOSTANZE GRASSE			89	1			4	28					2012-03-01	2012	Squalene and its hydrogenated product Squalane are highly sought raw materials by the cosmetic industries for their functional characteristics.Besides a general preference by the cosmetic industry for ingredients of vegetable vs. animal origin, vegetable Squalene is most required since it is a co-product of vegetable oil production (or better, refining process), mainly olive oil (Olea Europaea), …						0			0	0035-6808		WOS:000302645800002
J	Nick, Otway; Megan, Ellis						Construction and test of an artificial uterus for ex situ development of shark embryos.						Zoo biology			31	2			197	205		10.1002/zoo.20422			2012-Mar	2012	An artificial uterus (AU) was constructed from clear and opaque acrylic and life-support and monitoring systems were attached. The dwarf ornate wobbegong shark (Orectolobus ornatus) was used to test the AU because recent research has shown that during pregnancy the uterine fluid composition changes with mid- to late-term embryos immersed in seawater. An artificial uterine fluid comprising filtere…						0			0	1098-2361		MEDLINE:21905089
J	Sansom, Ivan J.; Davies, Neil S.; Coates, Michael I.; Nicoll, Robert S.; Ritchie, Alex						Chondrichthyan-like scales from the Middle Ordovician of Australia			Part 2			PALAEONTOLOGY			55				243	247		10.1111/j.1475-4983.2012.01127.x			2012-03-01	2012	Microvertebrate sampling of the Stairway Sandstone (Darriwilian, Middle Ordovician, central Australia) has yielded scales that are chondrichthyan-like in their overall construction, and Tantalepis gatehousei gen. et sp. nov. is erected here to describe these specimens. Tantalepis gatehousei gen. et sp. nov. is the stratigraphically oldest microsquamous taxon described thus far, and the shark-like…						0			0	0031-0239		WOS:000301434100001
J	Brazeau, Martin D.						A revision of the anatomy of the Early Devonian jawed vertebrate Ptomacanthus anglicus Miles			Part 2			PALAEONTOLOGY			55				355	367		10.1111/j.1475-4983.2012.01130.x			2012-03-01	2012	The spine-bearing jawed vertebrates (gnathostomes) assigned to the assemblage Acanthodii play a key role in understanding the early evolution of osteichthyans and chondrichthyans. Amongst acanthodians, the genus Ptomacanthus has played a prominent role owing to its shark-like tooth files. Recently described braincase material from this taxon contrasts strongly with the osteichthyan-like braincase…						0			0	0031-0239		WOS:000301434100008
J	McCauley, Douglas J.; McLean, Kevin A.; Bauer, John; Young, Hillary S.; Micheli, Fiorenza						Evaluating the performance of methods for estimating the abundance of rapidly declining coastal shark populations						ECOLOGICAL APPLICATIONS			22	2			385	392					2012-03-01	2012	Accurately surveying shark populations is critical to monitoring precipitous ongoing declines in shark abundance and interpreting the effects that these reductions are having on ecosystems. To evaluate the effectiveness of existing survey tools, we used field trials and computer simulations to critically examine the operation of four common methods for counting coastal sharks: stationary point co…						0			0	1051-0761		WOS:000302516900001
J	Young, Mallory K.; Tkalcic, Hrvoje; Rawlinson, Nicholas; Reading, Anya M.						Exploiting seismic signal and noise in an intracratonic environment to constrain crustal structure and source parameters of infrequent earthquakes						GEOPHYSICAL JOURNAL INTERNATIONAL			188	3			1303	1321		10.1111/j.1365-246X.2011.05326.x			2012-03-01	2012	In many regions of the world characterized by a relatively low rate of seismicity, the determination of local and regional seismic source parameters is often restricted to an analysis of the first onsets of P waves (or first motion analysis) due to incomplete information about Earth structure and the small size of the events. When rare large earthquakes occur in these regions, their waveforms can…						1			1	0956-540X		WOS:000300567400038
J	Marn, M. Virscek; Plesko, I. Mavric; Zindovic, J.; Miladinovic, Z.						DIVERSITY OF PLUM POX VIRUS ISOLATES IN MONTENEGRO						JOURNAL OF PLANT PATHOLOGY			94	1			201	204					2012-03-01	2012	In 2006 and 2007, stone fruit tree samples collected throughout Montenegro were tested for the presence of Plum pox virus (PPV) by DAS-ELISA. The majority (85%) of the plum and peach samples were infected. The occurrence of PPV was confirmed by immunocapture-RT-PCR using various primer pairs and by sequencing. The sequence of a 908 nt fragment corresponding to the Mb(C-ter)/CP(N-ter) region of 43…						0			0	1125-4653		WOS:000302375300020
J	Salamon, Mariusz A.; Niedzwiedzki, Robert; Gorzelak, Przemyslaw; Lach, Rafal; Surmik, Dawid						Bromalites from the Middle Triassic of Poland and the rise of the Mesozoic Marine Revolution						PALAEOGEOGRAPHY PALAEOCLIMATOLOGY PALAEOECOLOGY			321				142	150		10.1016/j.palaeo.2012.01.029			MAR 1 2012	2012	Durophagous predation has been an important cause of significant evolutionary changes in the history of life. One of the most dramatic predation-driven changes in marine ecosystems occurred during the middle and late Mesozoic, which has been called the Mesozoic Marine Revolution (MMR). At this time, diversification of various predators elicited many escalation-related adaptations among prey taxa …						1			1	0031-0182		WOS:000301912000013
J	Malpica-Cruz, Luis; Herzka, Sharon Z.; Sosa-Nishizaki, Oscar; Lazo, Juan Pablo						Tissue-specific isotope trophic discrimination factors and turnover rates in a marine elasmobranch: empirical and modeling results						CANADIAN JOURNAL OF FISHERIES AND AQUATIC SCIENCES			69	3			551	564		10.1139/F2011-172			2012-03-01	2012	There are very few studies reporting isotopic trophic discrimination factors and turnover rates for marine elasmobranchs. A controlled laboratory experiment was conducted to estimate carbon and nitrogen isotope trophic discrimination factors and isotope turnover rates for blood, liver, muscle, cartilage tissue, and fin samples of neonate to young-of-the-year leopard sharks (Triakis semifasciata).…						0			0	0706-652X		WOS:000301303000011
J	Wang, Yamin; Li, Wei; Zeng, Xiaoguang; Cui, Yunchen						A short note on the horizontal and vertical movements of a whale shark, Rhincodon typus, tracked by satellite telemetry in the South China Sea						INTEGRATIVE ZOOLOGY			7	1			94	98		10.1111/j.1749-4877.2012.00279.x			2012-03-01	2012	Whale sharks, a global migratory species, are often reported entangled in fishing nets in coastal areas of China. The effectiveness of conservation measures has been constrained by very limited knowledge on their movements and preferred habitats in the coastal areas of China. For the first time, we tracked the movements of 2 whale sharks by satellite telemetry in Mainland China. The tracking resu…						0			0	1749-4877		WOS:000301175000009
J	Karl, Stephen A.; Castro, Andrey L. F.; Garla, Ricardo C.						Population genetics of the nurse shark (Ginglymostoma cirratum) in the western Atlantic						MARINE BIOLOGY			159	3			489	498		10.1007/s00227-011-1828-y			2012-03-01	2012	The nurse shark, Ginglymostoma cirratum, inhabits shallow, tropical, and subtropical waters in the Atlantic and the eastern Pacific. Unlike many other species of sharks, nurse sharks are remarkably sedentary. We assayed the mitochondrial control region and eight microsatellite loci from individuals collected primarily in the western Atlantic to estimate the degree of population subdivision. Two i…						0			0	0025-3162		WOS:000301846400003
J	Guijarro, Beatriz; Quetglas, Antoni; Moranta, Joan; Ordines, Francesc; Valls, Maria; Gonzalez, Natalia; Massuti, Enric						Inter- and intra-annual trends and status indicators of nektobenthic elasmobranchs off the Balearic Islands (northwestern Mediterranean)						SCIENTIA MARINA			76	1			87	96		10.3989/scimar.03432.22A			2012-03-01	2012	We assessed the elasmobranch communities exploited by the bottom trawl fishery off the Balearic Islands (northwestern Mediterranean) by analysing two time series containing information with different levels of detail: 1) a long-term series containing the abundance indices of the whole elasmobranch community landed from 1965 to 2009; and 2) a shorter time series from 2000 to 2009 from two differen…						0			0	0214-8358		WOS:000301806800010
J	Orlov, Alexei M.; Savinykh, Vadim F.; Kulish, Eugeny F.; Pelenev, Dmitry V.						New data on the distribution and size composition of the North Pacific spiny dogfish Squalus suckleyi (Girard, 1854)						SCIENTIA MARINA			76	1			111	122		10.3989/scimar.03439.22C			2012-03-01	2012	The results of long-term research on the spatial and vertical distribution of the North Pacific spiny dogfish Squalus suckleyi in the North Pacific Ocean and its size composition are presented. In total, data from 7059 catches of this species were analyzed (3178 with associated capture depth). The description of size composition is based on measurements of 413 specimens caught by driftnets, 328 b…						0			0	0214-8358		WOS:000301806800012
J	Sims, David W.; Humphries, Nicolas E.; Bradford, Russell W.; Bruce, Barry D.						Levy flight and Brownian search patterns of a free-ranging predator reflect different prey field characteristics						JOURNAL OF ANIMAL ECOLOGY			81	2			432	442		10.1111/j.1365-2656.2011.01914.x			2012-03-01	2012	1. Search processes play an important role in physical, chemical and biological systems. In animal foraging, the search strategy predators should use to search optimally for prey is an enduring question. Some models demonstrate that when prey is sparsely distributed, an optimal search pattern is a specialised random walk known as a Levy flight, whereas when prey is abundant, simple Brownian motio…						3			3	0021-8790		WOS:000300502600014
J	Coscia, Maria Rosaria; Cocca, Ennio; Giacomelli, Stefano; Cuccaro, Fausta; Oreste, Umberto						Immunoglobulin from Antarctic fish species of Rajidae family						MARINE GENOMICS			5				35	41		10.1016/j.margen.2011.09.001			2012-03-01	2012	Immunoglobulins (Ig) of Chondroichthyes have been extensively studied in sharks: in contrast, in skates investigations on Ig remain scarce and fragmentary despite the high occurrence of skates in all of the major oceans of the world. To focus on Rajidae Igu, the most abundant heavy chain isotype, we have chosen the Antarctic species Bathyraja eatonii, Bathyraja albomaculata, Bathyraja brachyurops…						0			0	1874-7787		WOS:000301700900006
J	Pinsky, Tali; Wajnryb, Bronislaw						DYNAMICS OF SHEAR HOMEOMORPHISMS OF TORI AND THE BESTVINA-HANDEL ALGORITHM						TOPOLOGICAL METHODS IN NONLINEAR ANALYSIS			39	1			119	150					2012-03-01	2012	Sharkovskii proved that the existence of a periodic orbit of period which is not a power of 2 in a one-dimensional dynamical system implies existence of infinitely many periodic orbits. We obtain an analog of Sharkovskiis theorem for periodic orbits of shear homeomorphisms of the torus. This is done by obtaining a dynamical order relation on the set of simple orbits and simple pairs. We then use …						0			0	1230-3429		WOS:000301511300008
J	Gray, Angel; Litinas, Evangelos; Jeske, Walter; Fareed, Jawed; Hoppensteadt, Debra						Interactions of Oversulfated Chondroitin Sulfate (OSCS) From Different Sources With Unfractionated Heparin						CLINICAL AND APPLIED THROMBOSIS-HEMOSTASIS			18	2			166	173		10.1177/1076029611421167			MAR-APR 2012	2012	In 2008, oversulfated chondroitin sulfate (OSCS) was identified as the main contaminant in recalled heparin. Oversulfated chondroitin sulfate can be prepared from bovine (B), porcine (P), shark (Sh), or skate (S) origin and may produce changes in the antithrombotic, bleeding, and hemodynamic profile of heparins. This study examines the interactions of various OSCSs on heparin in animal models of …						0			0	1076-0296		WOS:000301287300007
J	Criscitiello, Michael F.; Ohta, Yuko; Graham, Matthew D.; Eubanks, Jeannine O.; Chen, Patricia L.; Flajnik, Martin F.						Shark class II invariant chain reveals ancient conserved relationships with cathepsins and MHC class II						DEVELOPMENTAL AND COMPARATIVE IMMUNOLOGY			36	3			521	533		10.1016/j.dci.2011.09.008			2012-03-01	2012	The invariant chain (li) is the critical third chain required for the MHC class II heterodimer to be properly guided through the cell, loaded with peptide, and expressed on the surface of antigen presenting cells. Here, we report the isolation of the nurse shark li gene, and the comparative analysis of li splice variants, expression, genomic organization, predicted structure, and function through…						0			0	0145-305X		WOS:000301170800003
J	Saha, Amartya K.; Moses, Christopher S.; Price, Rene M.; Engel, Victor; Smith, Thomas J., III; Anderson, Gordon						A Hydrological Budget (2002-2008) for a Large Subtropical Wetland Ecosystem Indicates Marine Groundwater Discharge Accompanies Diminished Freshwater Flow						ESTUARIES AND COASTS			35	2			459	474		10.1007/s12237-011-9454-y			2012-03-01	2012	Water budget parameters are estimated for Shark River Slough (SRS), the main drainage within Everglades National Park (ENP) from 2002 to 2008. Inputs to the water budget include surface water inflows and precipitation while outputs consist of evapotranspiration, discharge to the Gulf of Mexico and seepage losses due to municipal wellfield extraction. The daily change in volume of SRS is equated t…						0			0	1559-2723		WOS:000300771900008
J	Bury, Danielle; Langlois, Neil; Byard, Roger W.						Animal-Related FatalitiesuPart I: Characteristic Autopsy Findings and Variable Causes of Death Associated with Blunt and Sharp Trauma						JOURNAL OF FORENSIC SCIENCES			57	2			370	374		10.1111/j.1556-4029.2011.01921.x			2012-03-01	2012	Animals may be responsible for an array of potentially lethal injuries. Blunt force injuries characteristically involve larger animals such as cattle or horses that may kick, crush, or trample a victim causing head and facial injuries. Farm workers in particular are at high risk of lethal injuries involving the head and torso. Significant blunt trauma may be found in vehicle occupants after colli…						1			1	0022-1198		WOS:000300696400011
J	Griffiths, Andrew M.; Jacoby, David M. P.; Casane, Didier; McHugh, Matthew; Croft, Darren P.; Genner, Martin J.; Sims, David W.						First Analysis of Multiple Paternity in an Oviparous Shark, the Small-Spotted Catshark (Scyliorhinus canicula L.)						JOURNAL OF HEREDITY			103	2			166	173		10.1093/jhered/esr112			MAR-APR 2012	2012	Multiple paternity (MP) has been demonstrated in a variety of sharks, although its prevalence and the number of sires per litter vary considerably among species. To date, such analyses have focused on viviparous species that possess only part of the wide spectrum of reproductive strategies developed in elasmobranchs. We analyzed MP in an oviparous species, the small-spotted catshark (Scyliorhinus…						0			0	0022-1503		WOS:000300723400002
J	Le Port, Agnes; Lavery, Shane						Population Structure and Phylogeography of the Short-Tailed Stingray, Dasyatis brevicaudata (Hutton 1875), in the Southern Hemisphere						JOURNAL OF HEREDITY			103	2			174	185		10.1093/jhered/esr131			MAR-APR 2012	2012	There is accumulating evidence that the degree of vagility explains little of the extent of population subdivision found within elasmobranch species. Instead, patterns of gene flow in elasmobranchs appear more closely linked to the presence of dispersal barriers, either physical or biological. Here, we investigate the potential role of some of these isolating mechanisms in shaping the population …						0			0	0022-1503		WOS:000300723400003
J	Almagro, Juan Carlos; Raghunathan, Gopalan; Beil, Eric; Janecki, Dariusz J.; Chen, Qiang; Dinh, Thai; LaCombe, Ann; Connor, Judy; Ware, Mark; Kim, Paul H.; Swanson, Ronald V.; Fransson, Johan						Characterization of a high-affinity human antibody with a disulfide bridge in the third complementarity-determining region of the heavy chain						JOURNAL OF MOLECULAR RECOGNITION			25	3	SI		125	135		10.1002/jmr.1168			2012-03-01	2012	Disulfide bridges are common in the antigen-binding site from sharks (new antigen receptor) and camels (single variable heavy-chain domain, VHH), in which they confer both structural diversity and domain stability. In human antibodies, cysteine residues in the third complementarity-determining region of the heavy chain (CDR-H3) are rare but naturally encoded in the IGHD germline genes. Here, by p…						0			0	0952-3499		WOS:000301232300005
J	Vandebergh, Wim; Bossuyt, Franky						Radiation and Functional Diversification of Alpha Keratins during Early Vertebrate Evolution						MOLECULAR BIOLOGY AND EVOLUTION			29	3			995	1004		10.1093/molbev/msr269			2012-03-01	2012	The conquest of land was arguably one of the most fundamental ecological transitions in vertebrates and entailed significant changes in skin structure and appendages to cope with the new environment. In extant tetrapods, the rigidity of the integument is largely created by type I and type II keratins, which are structural proteins essential in forming a strong cytoplasmic network. It is expected …						0			0	0737-4038		WOS:000300496800011
J	Chabot, Chris L.						Characterization of 11 microsatellite loci for the brown smooth-hound shark, Mustelus henlei (Triakidae), discovered with next-generation sequencing						CONSERVATION GENETICS RESOURCES			4	1			23	25		10.1007/s12686-011-9464-x			2012-03-01	2012	The brown smooth-hound shark, Mustelus henlei (Triakidae), is an endemic member of the eastern Pacific shark assemblage considered both commercially and recreationally important. Here, microsatellite loci for M. henlei discovered by next-generation sequencing (Roche 454 pyrosequencing) are described. All loci were polymorphic (3-10 alleles) with observed heterozygosities between 0.24 and 0.89 and…						0			0	1877-7252		WOS:000300772500005
J	Giresi, Melissa; Renshaw, Mark A.; Portnoy, David S.; Gold, John R.						Isolation and characterization of microsatellite markers for the dusky smoothhound shark, Mustelus canis						CONSERVATION GENETICS RESOURCES			4	1			101	104		10.1007/s12686-011-9484-6			2012-03-01	2012	A total of 32 nuclear-encoded microsatellites, including 15 polymorphic and 13 monomorphic microsatellites, isolated from an enriched genomic library of the triakid shark, Mustelus canis (dusky smoothhound), and four microsatellites previously isolated from two other triakid sharks were characterized in 91 individuals of M. canis. Polymorphic repeat motifs included 12 dinucleotide, two trinucleot…						0			0	1877-7252		WOS:000300772500024
J	Giresi, Melissa; Renshaw, Mark A.; Portnoy, David S.; Gold, John R.						Isolation and characterization of microsatellite markers for the blacknose shark, Carcharhinus acronotus						CONSERVATION GENETICS RESOURCES			4	1			141	145		10.1007/s12686-011-9494-4			2012-03-01	2012	The blacknose shark, Carcharhinus acronotus, is distributed in coastal waters of the western Atlantic Ocean from North Carolina to Brazil and is a component of both commercial and recreational fisheries throughout its range. In waters off of the United States, the species is managed as a component of the small coastal shark (SCS) complex. Concerns recently have arisen that blacknose sharks are ov…						0			0	1877-7252		WOS:000300772500034
J	Hovestadt, Dirk C.; Hovestadt-Euler, Maria						A partial skeleton of Cetorhinus parvus Leriche, 1910 (Chondrichthyes, Cetorhinidae) from the Oligocene of Germany						PALAEONTOLOGISCHE ZEITSCHRIFT			86	1			71	83		10.1007/s12542-011-0118-9			2012-03-01	2012	A partial skeleton of a shark was found in the Frauenweiler clay pit near Rauenberg (Oligocene, Rupelian; Baden-Wurttemberg, S. Germany). The shark is identified as Cetorhinus parvus Leriche 1910. One tooth, vertebrae, dermal denticles and most of the filter apparatus of the juvenile specimen are described and illustrated. A terminology is introduced for the gill raker elements of the genus Cetor…						0			0	0031-0220		WOS:000300779800006
J	Goforth, Christine L.; Smith, Robert L.						Subsurface behaviours facilitate respiration by a physical gill in an adult giant water bug, Abedus herberti						ANIMAL BEHAVIOUR			83	3			747	753		10.1016/j.anbehav.2011.12.023			2012-03-01	2012	Abedus herberti is an aquatic bug that carries a subalar store of atmospheric air for use during submersion. When submersed, adult bugs routinely show two patterns of behaviour we call gaping and dynamic gaping. We studied these behaviours to determine when they are expressed and tested the hypothesis that the behaviours serve a respiratory function. Gaping and dynamic gaping occurred when bugs w…						0			0	3472-03-01		WOS:000300618100020
J	Warne, Kennedy						Tales of the Arabian Seas						National Geographic			221	3			66						2012-03-01	2012							0			0	0027-9358		BCI:BCI201200236691
J	Cui, Jing; Fu, Yabo						A Numerical Study on Pressure Drop in Microchannel Flow with Different Bionic Micro-Grooved Surfaces						JOURNAL OF BIONIC ENGINEERING			9	1			99	109		10.1016/S1672-6529(11)60102-9			2012-03-01	2012	The studies of bionics reveal that some aquatic animals and winged insects have developed an unsmoothed surface possessing good characteristics of drag reduction. In this paper, four types of bionic surfaces, placoid-shaped, V-shaped, riblet-shaped, and ridge-shaped grooved surfaces, are employed as the microchannel surfaces for the purpose of reducing pressure loss. Lattice Boltzmann Method (LBM…						0			0	1672-6529		WOS:000300277600012
J	Oeffner, Johannes; Lauder, George V.						The hydrodynamic function of shark skin and two biomimetic applications						JOURNAL OF EXPERIMENTAL BIOLOGY			215	5			785	795		10.1242/jeb.063040			2012-03-01	2012	It has long been suspected that the denticles on shark skin reduce hydrodynamic drag during locomotion, and a number of man-made materials have been produced that purport to use shark-skin-like surface roughness to reduce drag during swimming. But no studies to date have tested these claims of drag reduction under dynamic and controlled conditions in which the swimming speed and hydrodynamics of …						1			1	0022-0949		WOS:000300415400018
J	Caballero, S.; Cardenosa, D.; Soler, G.; Hyde, J.						Application of multiplex PCR approaches for shark molecular identification: feasibility and applications for fisheries management and conservation in the Eastern Tropical Pacific						MOLECULAR ECOLOGY RESOURCES			12	2			233	237		10.1111/j.1755-0998.2011.03089.x			2012-03-01	2012	Here we describe the application of new and existing multiplex PCR methodologies for shark species molecular identification. Four multiplex systems (group ID, thresher sharks, hammerhead sharks and miscellaneous shark) were employed with primers previously described and some designed in this study, which allow for species identification after running PCR products through an agarose gel. This syst…						0			0	1755-098X		WOS:000299930300005
J	Fabinyi, Michael						Historical, cultural and social perspectives on luxury seafood consumption in China						ENVIRONMENTAL CONSERVATION			39	1			83	92		10.1017/S0376892911000609			2012-03-01	2012	Since China is a leading market for a number of types of seafood, and much of this seafood is imported from other countries, Chinese consumption of seafood is an issue of vital importance to many of the world's fisheries. Focusing on luxury seafood, in particular beche-de-mer, shark fin and live reef food fish, this paper firstly examines the links between Chinese consumption and species populati…						0			0	0376-8929		WOS:000299937200009
J	Paiva, Rafaela Barros; Neves, Ana; Sequeira, Vera; Nunes, Maria Leonor; Gordo, Leonel Serrano; Bandarra, Narcisa						Reproductive strategy of the female deep-water shark birdbeak dogfish, Deania calcea: lecithotrophy or matrotrophy?						JOURNAL OF THE MARINE BIOLOGICAL ASSOCIATION OF THE UNITED KINGDOM			92	2			387	394		10.1017/S0025315411001743			2012-03-01	2012	Little information is available on the maternal-embryonic relationships among sharks. Birdbeak dogfish (Deania calcea) has been described as ovoviviparous, but this term comprises a wide range of forms on how the embryos are nourished including lecithotrophy and matrotrophy. To evaluate the maternal-embryonic relationship in birdbeak dogfish we have analysed chemical features (fatty acid composit…						0			0	0025-3154		WOS:000299931800017
J	Norse, Elliott A.; Brooke, Sandra; Cheung, William W. L.; Clark, Malcolm R.; Ekeland, Lvar; Froese, Rainer; Gjerde, Kristina M.; Haedrich, Richard L.; Heppell, Selina S.; Morato, Telmo; Morgan, Lance E.; Pauly, Daniel; Sumaila, Rashid; Watson, Reg						Sustainability of deep-sea fisheries						MARINE POLICY			36	2			307	320		10.1016/j.marpol.2011.06.008			2012-03-01	2012	As coastal fisheries around the world have collapsed, industrial fishing has spread seaward and deeper in pursuit of the last economically attractive concentrations of fishable biomass. For a seafood-hungry world depending on the oceans' ecosystem services, it is crucial to know whether deep-sea fisheries can be sustainable.The deep sea is by far the largest but least productive part of the ocean…						0			0	0308-597X		WOS:000298219300001
J	Queiroz, Nuno; Humphries, Nicolas E.; Noble, Leslie R.; Santos, Antonio M.; Sims, David W.						Spatial Dynamics and Expanded Vertical Niche of Blue Sharks in Oceanographic Fronts Reveal Habitat Targets for Conservation						PLOS ONE			7	2					e32374	10.1371/journal.pone.0032374			FEB 29 2012	2012	Dramatic population declines among species of pelagic shark as a result of overfishing have been reported, with some species now at a fraction of their historical biomass. Advanced telemetry techniques enable tracking of spatial dynamics and behaviour, providing fundamental information on habitat preferences of threatened species to aid conservation. We tracked movements of the highest pelagic fi…						0			0	1932-6203		WOS:000303003500056
J	Balmaceda-Aguilera, Carolina; Cortes-Campos, Christian; Cifuentes, Manuel; Peruzzo, Bruno; Mack, Lauren; Tapia, Juan Carlos; Oyarce, Karina; Angeles Garcia, Maria; Nualart, Francisco						Glucose Transporter 1 and Monocarboxylate Transporters 1, 2, and 4 Localization within the Glial Cells of Shark Blood-Brain-Barriers						PLOS ONE			7	2					e32409	10.1371/journal.pone.0032409			FEB 28 2012	2012	Although previous studies showed that glucose is used to support the metabolic activity of the cartilaginous fish brain, the distribution and expression levels of glucose transporter (GLUT) isoforms remained undetermined. Optic/ultrastructural immunohistochemistry approaches were used to determine the expression of GLUT1 in the glial blood-brain barrier (gBBB). GLUT1 was observed solely in glial …						0			0	1932-6203		WOS:000302999600038
J	Braccini, Matias; Van Rijn, Jay; Frick, Lorenz						High Post-Capture Survival for Sharks, Rays and Chimaeras Discarded in the Main Shark Fishery of Australia?						PLOS ONE			7	2					e32547	10.1371/journal.pone.0032547			FEB 27 2012	2012	Most sharks, rays and chimaeras (chondrichthyans) taken in commercial fisheries are discarded (i.e. returned to the ocean either dead or alive). Quantifying the post-capture survival (PCS) of discarded species is therefore essential for the improved management and conservation of this group. For all chondrichthyans taken in the main shark fishery of Australia, we quantified the immediate PCS of i…						0			0	1932-6203		WOS:000302918500098
J	Costa Castro, Luis Filipe; Monroig, Oscar; Leaver, Michael J.; Wilson, Jonathan; Cunha, Isabel; Tocher, Douglas R.						Functional Desaturase Fads1 (Delta 5) and Fads2 (Delta 6) Orthologues Evolved before the Origin of Jawed Vertebrates						PLOS ONE			7	2					e31950	10.1371/journal.pone.0031950			FEB 22 2012	2012	Long-chain polyunsaturated fatty acids (LC-PUFAs) such as arachidonic (ARA), eicosapentaenoic (EPA) and docosahexaenoic (DHA) acids are essential components of biomembranes, particularly in neural tissues. Endogenous synthesis of ARA, EPA and DHA occurs from precursor dietary essential fatty acids such as linoleic and alpha-linolenic acid through elongation and Delta 5 and Delta 6 desaturations. …						0			0	1932-6203		WOS:000302875500056
J	Finarelli, John A.; Coates, Michael I.						First tooth-set outside the jaws in a vertebrate						PROCEEDINGS OF THE ROYAL SOCIETY B-BIOLOGICAL SCIENCES			279	1729			775	779		10.1098/rspb.2011.1107			FEB 22 2012	2012	Holocephalans (ratfish, rabbitfish and chimaeras) figure with increasing prominence in studies of gnathostome evolutionary biology. Here, we provide the first complete description of the teeth and toothplates of one of the earliest known holocephalans, Chondrenchelys problematica, including the first unambiguous evidence of a gnathostome with an extra-mandibular dentition. We further demonstrate …						0			0	0962-8452		WOS:000299114100020
J	Carlisle, Aaron B.; Kim, Sora L.; Semmens, Brice X.; Madigan, Daniel J.; Jorgensen, Salvador J.; Perle, Christopher R.; Anderson, Scot D.; Chapple, Taylor K.; Kanive, Paul E.; Block, Barbara A.						Using Stable Isotope Analysis to Understand the Migration and Trophic Ecology of Northeastern Pacific White Sharks (Carcharodon carcharias)						PLOS ONE			7	2					e30492	10.1371/journal.pone.0030492			FEB 15 2012	2012	The white shark (Carcharodon carcharias) is a wide-ranging apex predator in the northeastern Pacific (NEP). Electronic tagging has demonstrated that white sharks exhibit a regular migratory pattern, occurring at coastal sites during the late summer, autumn and early winter and moving offshore to oceanic habitats during the remainder of the year, although the purpose of these migrations remains un…						0			0	1932-6203		WOS:000302741300013
J	Oliveira, Sarah Siqueira; Amorim, Dalton De Souza						Six new species of Paraleia Tonnoir (Diptera, Mycetophilidae): amphinotic elements at the northern range of the Andes						ZOOTAXA				3186			1	24					FEB 8 2012	2012	Paraleia was originally described by Tonnoir for P. fulvescens, known from Australia. More recently, eleven Neotropical species were added to the genus-nine of which are from Chile and southern Argentina, one from Bolivia, and one from Peru. This distribution pattern is typical of many mycetophilid genera. Six new Neotropical species of Paraleia from the Andean Colombia and Ecuador are herein des…						0			0	1175-5326		WOS:000300248000001
J	Bergamaschi, Brian A.; Krabbenhoft, David P.; Aiken, George R.; Patino, Eduardo; Rumbold, Darren G.; Orem, William H.						Tidally Driven Export of Dissolved Organic Carbon, Total Mercury, and Methylmercury from a Mangrove-Dominated Estuary						ENVIRONMENTAL SCIENCE & TECHNOLOGY			46	3			1371	1378		10.1021/es2029137			FEB 7 2012	2012	The flux of dissolved organic carbon (DOC) from mangrove swamps accounts for 10% of the global terrestrial flux of DOC to coastal oceans. Recent findings of high concentrations of mercury (Hg) and methylmercury (MeHg) in mangroves, in conjunction with the common co-occurrence of DOC and Hg species, have raised concerns that mercury fluxes may also be large. We used a novel approach to estimate ex…						0			0	0013-936X		WOS:000299864400014
J	Iosilevskii, Gil; Papastamatiou, Yannis P.; Meyer, Carl G.; Holland, Kim N.						Energetics of the yo-yo dives of predatory sharks						JOURNAL OF THEORETICAL BIOLOGY			294				172	181		10.1016/j.jtbi.2011.11.008			FEB 7 2012	2012	Sharks zigzag vertically through the water in a series of alternating ascending and descending segments, changing depth by a few tens of meters over a period of a few hundred seconds. This 'yo-yo' like behavior has several characteristic patterns, identifiable by the way the swimming and vertical velocities vary along the dive. We suggest that these patterns represent different optimal strategies…						1			1	0022-5193		WOS:000299353300017
J	Tillett, B. J.; Meekan, M. G.; Broderick, D.; Field, I. C.; Cliff, G.; Ovenden, J. R.						Pleistocene isolation, secondary introgression and restricted contemporary gene flow in the pig-eye shark, Carcharhinus amboinensis across northern Australia						CONSERVATION GENETICS			13	1			99	115		10.1007/s10592-011-0268-z			2012-02-01	2012	We examine the structure and phylogeography of the pig-eye shark (Carcharhinus amboinensis) common in shallow coastal environments in northern Australia using two types of genetic markers, two mitochondrial (control region and NADH hydrogenase 4) and two nuclear (microsatellite and Rag 1) DNA. Two populations were defined within northern Australia on the basis of mitochondrial DNA evidence, but t…						0			0	1566-0621		WOS:000303475800009
J	Ackerman, W. E.; Bulmer, J. N.; Carter, A. M.; Chaillet, J. R.; Chamley, L.; Chen, C. P.; Chuong, E. B.; Coleman, S. J.; Collet, G. P.; Croy, B. A.; de Mestre, A. M.; Dickinson, H.; Ducray, J.; Enders, A. C.; Fogarty, N. M. E.; Gauster, M.; Golos, T.; Haider, S.; Heazell, A. E.; Holland, O. J.; Huppertz, B.; Husebekk, A.; John, R. M.; Johnsen, G. M.; Jones, C. J. R.; Kalionisv, B.; Koenig, J.; Lo…						IFPA Meeting 2011 workshop report III: Placental immunology; epigenetic and microRNA-dependent gene regulation; comparative placentation; trophoblast differentiation; stem cells						PLACENTA			33				S15	S22		10.1016/j.placenta.2011.11.022		A	2012-02-01	2012	Workshops are an important part of the IFPA annual meeting as they allow for discussion of specialised topics. At IFPA meeting 2011 there were twelve themed workshops, five of which are summarized in this report. These workshops related to various aspects of placental biology: 1) immunology; 2) epigenetics; 3) comparative placentation; 4) trophoblast differentiation; 5) stem cells. (C) 2012 Publi…						0			0	0143-4004		WOS:000301868000005
J	Voegler, Rodolfo; Beier, Emilio; Ortega-Garcia, Sofia; Santana-Hernandez, Heriberto; Javier Valdez-Flores, J.						Ecological patterns, distribution and population structure of Prionace glauca (Chondrichthyes: Carcharhinidae) in the tropical-subtropical transition zone of the north-eastern Pacific						MARINE ENVIRONMENTAL RESEARCH			73				37	52		10.1016/j.marenvres.2011.10.009			2012-02-01	2012	Regional ecological patterns, distribution and population structure of Prionace glauca were analyzed based on samples collected on-board two long-line fleets operating in oceanic waters (1994-96/2000-02) and in coastal oceanic waters (2003-2009) of the eastern tropical Pacific off Mexico. Generalized additive models were applied to catch per unit of effort data to evaluate the effect of spatial, …						0			0	0141-1136		WOS:000300818900006
J	Wegner, Nicholas C.; Cartamil, Daniel P.						Effects of prolonged entanglement in discarded fishing gear with substantive biofouling on the health and behavior of an adult shortfin mako shark, Isurus oxyrinchus						MARINE POLLUTION BULLETIN			64	2			391	394		10.1016/j.marpolbul.2011.11.017			2012-02-01	2012	A mature male shortfin mako, Isurus oxyrinchus, was captured with a three-strand twisted natural fiber rope wrapped around the body causing deep abrasions, scoliosis of the back, and undernourishment. Fifty-two pelagic peduculate barnacles from four species were found fouling on the rope. Assuming larval settlement occurred following entanglement, barnacle growth-rate data suggest the rope had be…						0			0	0025-326X		WOS:000300864800038
J	Wilga, Cheryl D.; Maia, Anabela; Nauwelaerts, Sandra; Lauder, George V.						Prey handling using whole-body fluid dynamics in batoids						ZOOLOGY			115	1			47	57		10.1016/j.zool.2011.09.002			2012-02-01	2012	Fluid flow generated by body movements is a foraging tactic that has been exploited by many benthic species. In this study, the kinematics and hydrodynamics of prey handling behavior in little skates. Leucoraja erinacea, and round stingrays. Urobatis hailed, are compared using kinematics and particle image velocimetry. Both species use the body to form a tent to constrain the prey with the pector…						0			0	0944-2006		WOS:000301032400006
J	Kitahashi, Tsukasa; Ikawa, Shoko; Sakamoto, Akika; Nomura, Yoshihiro; Tsujiuchi, Toshifumi; Shimizu, Kenji; Sasabe, Shuji; Park, Eun Young; Nakamura, Yasushi; Tsutsumi, Masahiro; Sato, Kenji						Ingestion of Proteoglycan Fraction from Shark Cartilage Increases Serum Inhibitory Activity against Matrix Metalloproteinase-9 and Suppresses Development of N-Nitrosobis(2-oxopropyl)amine-Induced Pancreatic Duct Carcinogenesis in Hamster						JOURNAL OF AGRICULTURAL AND FOOD CHEMISTRY			60	4			940	945		10.1021/jf203613b			FEB 1 2012	2012	A water extract of shark cartilage was fractionated into acidic and basic fractions by preparative isoelectric focusing on the basis of the amphoteric nature of samples. The acidic fraction was further fractionated into ethanol-soluble and precipitate fractions. After the carcinogenesis treatment using N-nitrosobis(2-oxopropyl)amine, hamsters received a diet containing each fraction or purified c…						0			0	0021-8561		WOS:000300462500012
J	Wiszniewski, Joanna; Brown, Culum; Moeller, Luciana M.						Complex patterns of male alliance formation in a dolphin social network						JOURNAL OF MAMMALOGY			93	1			239	250		10.1644/10-MAMM-A-366.1			2012-02-01	2012	The formation and maintenance of alliances is regarded as one of the most socially complex male mating strategies in mammals. The prevalence and complexity of these cooperative relationships, however, varies considerably among species as well as within and between populations living in different ecological and social environments. We assessed patterns of alliance formation for judo-Pacific bottle…						0			0	0022-2372		WOS:000300598700022
J	Mondo, Kiyo; Hammerschlag, Neil; Basile, Margaret; Pablo, John; Banack, Sandra A.; Mash, Deborah C.						Cyanobacterial Neurotoxin beta-N-Methylamino-L-alanine (BMAA) in Shark Fins						MARINE DRUGS			10	2			509	520		10.3390/md10020509			2012-02-01	2012	Sharks are among the most threatened groups of marine species. Populations are declining globally to support the growing demand for shark fin soup. Sharks are known to bioaccumulate toxins that may pose health risks to consumers of shark products. The feeding habits of sharks are varied, including fish, mammals, crustaceans and plankton. The cyanobacterial neurotoxin beta-N-methylamino-L-alanine …						1			1	1660-3397		WOS:000300716000017
J	Dean, Brian; Bhushan, Bharat						The effect of riblets in rectangular duct flow						APPLIED SURFACE SCIENCE			258	8			3936	3947		10.1016/j.apsusc.2011.12.067			FEB 1 2012	2012	Much is known about the benefits of surface structures which mimic the riblets found on the skin of fast swimming sharks. Structures have been fabricated for study and application which replicate and improve upon the natural shape of the shark skin riblets, providing a maximum drag reduction of nearly 10% in external turbulent fluid flow. Mechanisms of fluid drag in turbulent flow and riblet-drag…						0			0	0169-4332		WOS:000300185800094
J	Lucifora, Luis O.; Garcia, Veronica B.; Menni, Roberto C.; Worm, Boris						Spatial patterns in the diversity of sharks, rays, and chimaeras (Chondrichthyes) in the Southwest Atlantic						BIODIVERSITY AND CONSERVATION			21	2			407	419		10.1007/s10531-011-0189-7			2012-02-01	2012	Knowing how the diversity of sharks, rays and chimaeras (Chondrichthyes) is distributed helps us to design strategies to conserve these highly-vulnerable predators and their habitats. Here, we analyzed the spatial distribution of chondrichthyan species richness in the Southwest Atlantic (34-56A(0)S), and its relationship with environmental variables and marine fronts, by using a dataset obtained …						0			0	0960-3115		WOS:000299703400006
J	Mourier, Johann; Vercelloni, Julie; Planes, Serge						Evidence of social communities in a spatially structured network of a free-ranging shark species						ANIMAL BEHAVIOUR			83	2			389	401		10.1016/j.anbehav.2011.11.008			2012-02-01	2012	Large, solitary, marine predators such as sharks have been observed to aggregate at specific areas. Such aggregations are almost certainly driven by foraging and behavioural strategies making space for diverse spatial organizations. Reef-associated shark species often show strong patterns of site fidelity that could be viewed as a prerequisite for sociality. However, there is limited empirical ev…						0			0	3472-03-01		WOS:000299539000012
J	Le Quesne, Will J. F.; Jennings, Simon						Predicting species vulnerability with minimal data to support rapid risk assessment of fishing impacts on biodiversity						JOURNAL OF APPLIED ECOLOGY			49	1			20	28		10.1111/j.1365-2664.2011.02087.x			2012-02-01	2012	1. Large-bodied species are especially vulnerable to fishing in mixed fisheries. Their effective conservation requires predictions of sensitivity and exposure to fishing mortality, but such predictions are hard to make when the population dynamics of most of these species have not been described.2. We present a method for assessing sensitivity and conservation management reference points using wi…						0			0	0021-8901		WOS:000299153800004
J	Noroozi, Nazbanoo; Thomson, Jaclyn A.; Noroozi, Nader; Schafer, Laurel L.; Hatzikiriakos, Savvas G.						Viscoelastic behaviour and flow instabilities of biodegradable poly (epsilon-caprolactone) polyesters						RHEOLOGICA ACTA			51	2			179	192		10.1007/s00397-011-0586-6			2012-02-01	2012	The viscoelastic behaviour of a number of commercial and newly synthesized linear biodegradable polyesters-poly (epsilon-caprolactone) (PCLs) with different molecular characteristics was investigated using both rotational and extensional rheometry. The variation of the zero-shear viscosity and relaxation spectrum with molecular weight was studied in detail. The damping function of these PCLs was …						0			0	0035-4511		WOS:000299511600007
J	Maz-Courrau, A.; Lopez-Vera, C.; Galvan-Magana, F.; Escobar-Sanchez, O.; Rosiles-Martinez, R.; Sanjuan-Munoz, A.						Bioaccumulation and Biomagnification of Total Mercury in Four Exploited Shark Species in the Baja California Peninsula, Mexico						BULLETIN OF ENVIRONMENTAL CONTAMINATION AND TOXICOLOGY			88	2			129	134		10.1007/s00128-011-0499-1			2012-02-01	2012	The present study determined the average mercury bioaccumulation in the muscle tissue of four shark species (Carcharhinus falciformis, Prionace glauca, Sphyrna zygaena and Isurus oxyrinchus) captured in the Baja California Peninsula. We also evaluated biomagnification of some prey consumed by sharks. All sharks' species had mercury levels over the limit specified by the Mexican government for hum…						0			0	4861-07-01		WOS:000299328300003
J	Verma, Omkar; Prasad, Guntupalli V. R.; Goswami, Anjali; Parmar, Varun						Ptychodus decurrens Agassiz (Elasmobranchii: Ptychodontidae) from the Upper Cretaceous of India						CRETACEOUS RESEARCH			33	1			183	188		10.1016/j.cretres.2011.09.014			2012-02-01	2012	Although a very high invertebrate faunal diversity is known from the outcrops of the Ariyalur group in the Cauvery Basin, southern India, little is known about its vertebrate fauna. Recent fieldwork in the badland exposures of the Karai Formation (Upper Cenomanian-Lower Turonian) near Garudamangalam in the basin has yielded two teeth belonging to the Late Cretaceous shark Ptychodus decurrens (Pty…						0			0	0195-6671		WOS:000298718400018
J	Xie, Qiuling; Yao, Sheng; Chen, Xiaojia; Xu, Lihui; Peng, Wendan; Zhang, Ling; Zhang, Qihao; Liang, Xu-Fang; Hong, An						A polypeptide from shark troponin I can inhibit angiogenesis and tumor growth						MOLECULAR BIOLOGY REPORTS			39	2			1493	1501		10.1007/s11033-011-0887-y			2012-02-01	2012	The shark troponin I gene (TnI) was found for the first time in this study to inhibit endothelial cell proliferation and angiogenesis. This shark TnI had 68.9% amino acid homology with human TnI, whereas the polypeptide from Lys91 to Leu123, which is thought to be the active site of TnI, had 78.8% homology with the corresponding fragment of human TnI. However, the polypeptide of shark had higher …						0			0	0301-4851		WOS:000298751300084
J	Hilborn, Ray						THE EVOLUTION OF QUANTITATIVE MARINE FISHERIES MANAGEMENT 1985-2010						NATURAL RESOURCE MODELING			25	1	SI		122	144		10.1111/j.1939-7445.2011.00100.x			2012-02-01	2012	This paper reviews the changes in quantitative marine fisheries management between 1985 and 2010. The two primary areas where quantitative methods have been employed are in the assessment of stock size and exploitation rates, and in the design and evaluation of harvest strategies. In 1985, some areas had well established assessment programs in place, and the assessment methods have been relativel…						0			0	0890-8575		WOS:000298636200005
J	Dippenaar, Susan M.; Jordaan, Bea P.						Notes on the morphology and ecology of the adult females of Nesippus species (Siphonostomatoida: Pandaridae) with a key for identification						ZOOTAXA				3170			18	30					JAN 24 2012	2012	Nesippus Heller, 1868 species are members of Pandaridae without dorsal plates on the second free thoracic segment. Currently there are five accepted species, namely N. orientalis Heller, 1868, N. crypturus Heller, 1868, N. vespa Kirtisinghe, 1964, N. tigris Cressey, 1967 and N. nana Cressey, 1970. Members of Nesippus were collected from a variety of elasmobranch hosts caught in the nets of the Na…						0			0	1175-5326		WOS:000300236500002
J	Ullah, Md. Hadayet; Rashed-Un-Nabi, Md.; Al-Mamun, Md. Abdulla						Trophic model of the coastal ecosystem of the Bay of Bengal using mass balance Ecopath model						ECOLOGICAL MODELLING			225				82	94		10.1016/j.ecolmodel.2011.11.013			JAN 24 2012	2012	A mass-balanced trophic model was developed for the shallow coastal ecosystem of the Bay of Bengal (BOB) using a user friendly software model, Ecopath with Ecosim, (Ecopath, version 5.0 Beta). The BOB model encompassed an area of 24,000 km(2) and had 14 functional ecological groups of which 13 were living groups and one dead group (detritus). The model assessed the trophic relationship, energy fl…						0			0	0304-3800		WOS:000299984800008
J	Bhushan, Bharat						Bioinspired Structured Surfaces						LANGMUIR			28	3			1698	1714		10.1021/la2043729			JAN 24 2012	2012	Nature has evolved objects with desired functionality using commonly found materials. Nature capitalizes on hierarchical structures to achieve functionality. The understanding of the functions provided by objects and processes found in nature can guide us to produce nanomaterials, nanodevices, and processes with desirable functionality. Various natural objects which provide functionality of comme…						1			1	0743-7463		WOS:000299366500008
J	Moore, Alec B. M.; Ward, Robert D.; Peirce, Richard						Sharks of the Persian (Arabian) Gulf: a first annotated checklist (Chondrichthyes: Elasmobranchii)						ZOOTAXA				3167			1	16					JAN 20 2012	2012	The first evidence-based checklist of sharks of the Persian (Arabian) Gulf is presented based on appraisal of primary literature and new data, including identifications verified by COI barcoding. Evidence of the occurrence of 26 species in the Gulf is presented, and the possible presence of a further 17 species is discussed. Carcharhinidae is the most species-rich family (16 species) present. The…						0			0	1175-5326		WOS:000300235100001
J	Mauricio Hoyos-Padilla, E.; Patricia Ceballos-Vazquez, B.; Galvan-Magana, Felipe						Reproductive Biology of the Silky Shark Carcharhinus falciformis (Chondrichthyes: Carcharhinidae) off the west coast of Baja California Sur, Mexico						Aqua			18	1			15	24					JAN 15 2012	2012	The silky shark Carcharhinus falciformis population has declined drastically in the last few years, due to extensive by-catch in tuna purse-seine and longline fisheries in the eastern Pacific Ocean. No information exists on the reproductive biology of this species in the eastern Pacific Ocean to support fishery or conservation management. A total of 295 silky sharks were analyzed, with 179 female…						0			0	0945-9871		BCI:BCI201200130248
J	Rutkowski, Rachael; Gartner, Anton						The shark in us: Learning about the evolution of the p53 regulatory circuit						CELL CYCLE			11	2			216	217		10.4161/cc.11.2.18901			JAN 15 2012	2012							0			0	1538-4101		WOS:000299164200011
J	Govaert, Jochen; Pellis, Mireille; Deschacht, Nick; Vincke, Cecile; Conrath, Katja; Muyldermans, Serge; Saerens, Dirk						Dual Beneficial Effect of Interloop Disulfide Bond for Single Domain Antibody Fragments						JOURNAL OF BIOLOGICAL CHEMISTRY			287	3			1970	1979		10.1074/jbc.M111.242818			JAN 13 2012	2012	The antigen-binding fragment of functional heavy chain antibodies (HCAbs) in camelids comprises a single domain, named the variable domain of heavy chain of HCAbs (VHH). The VHH harbors remarkable amino acid substitutions in the framework region-2 to generate an antigen-binding domain that functions in the absence of a light chain partner. The substitutions provide a more hydrophilic, hence more …						0			0	0021-9258		WOS:000299321000038
J	Monette, Michelle Y; Forbush, Biff						Regulatory activation is accompanied by movement in the C terminus of the Na-K-Cl cotransporter (NKCC1).						The Journal of biological chemistry			287	3			2210	20					2012-Jan-13	2012	The Na-K-Cl cotransporter (NKCC1) is expressed in most vertebrate cells and is crucial in the regulation of cell volume and intracellular chloride concentration. To study the structure and function of NKCC1, we tagged the transporter with cyan (CFP) and yellow (YFP) fluorescent proteins at two sites within the C terminus and measured fluorescence resonance energy transfer (FRET) in stably express…						0			0	1083-351X		MEDLINE:22121194
J	Daly-Engel, Toby S.; Seraphin, Kanesa D.; Holland, Kim N.; Coffey, John P.; Nance, Holly A.; Toonen, Robert J.; Bowen, Brian W.						Global Phylogeography with Mixed-Marker Analysis Reveals Male-Mediated Dispersal in the Endangered Scalloped Hammerhead Shark (Sphyrna lewini)						PLOS ONE			7	1			279	289	e29986	10.1371/journal.pone.0029986			JAN 10 2012	2012	Background: The scalloped hammerhead shark, Sphyrna lewini, is a large endangered predator with a circumglobal distribution, observed in the open ocean but linked ontogenetically to coastal embayments for parturition and juvenile development. A previous survey of maternal (mtDNA) markers demonstrated strong genetic partitioning overall (global Phi(ST) = 0.749) and significant population separatio…						1			1	1932-6203		WOS:000301353900030
P	Novicki, Deborah L.						Polychlorinated biphenyls and squalene-containing adjuvants			US 08092813	Novartis AG		Official Gazette of the United States Patent and Trademark Office Patents													JAN 10 2012	2012	When using squalene in a vaccine adjuvant, there is a possibility of contamination with polychlorinated biphenyls (PCBs). Environmental exposure to PCBs may adversely affect children's immune responses to routine vaccinations. Thus the invention uses squalene with low or no PCB contamination, particularly when derived from shark liver.						0			0	0098-1133		BCI:BCI201200113751
J	Zhao, S. M.; Leach, J.; Gong, L. Y.; Ding, J.; Zheng, B. Y.						Aberration corrections for free-space optical communications in atmosphere turbulence using orbital angular momentum states						OPTICS EXPRESS			20	1			452	461					JAN 2 2012	2012	The effect of atmosphere turbulence on light's spatial structure compromises the information capacity of photons carrying the Orbital Angular Momentum (OAM) in free-space optical (FSO) communications. In this paper, we study two aberration correction methods to mitigate this effect. The first one is the Shack-Hartmann wavefront correction method, which is based on the Zernike polynomials, and the…						1			1	1094-4087		WOS:000300082100062
J	Yigin, C. Cigdem; Ismen, Ali						Age, growth and reproduction of the common stingray, Dasyatis pastinaca from the North Aegean Sea						MARINE BIOLOGY RESEARCH			8	7			644	653					2012	2012	Age, growth and reproductive parameters of the common stingray, Dasyatis pastinaca, in the North Aegean Sea are reported. Age was estimated by counting the growth rings of thin sections of vertebral centra from 83 fish (83 - 114 cm total length, TL). The relationship between TL and the vertebral centrum ratio (CR) was curvilinear, therefore a quadratic model was preferred to describe between the …						0			0	1745-1000		CCC:000304592600008
J	Blower, Dean C.; Pandolfi, John M.; Bruce, Barry D.; Gomez-Cabrera, Maria del C.; Ovenden, Jennifer R.						Population genetics of Australian white sharks reveals fine-scale spatial structure, transoceanic dispersal events and low effective population sizes						MARINE ECOLOGY-PROGRESS SERIES			455				229	244					2012	2012	Despite international protection of white sharks Carcharodon carcharias, important conservation parameters such as abundance, population structure and genetic diversity are largely unknown. The tissue of 97 predominately juvenile white sharks sampled from spatially distant eastern and southwestern Australian coastlines was sequenced for the mitochondrial DNA (mtDNA) control region and genotyped w…						0			0	0171-8630		CCC:000304607100015
J	Belicka, Laura L.; Matich, Philip; Jaffe, Rudolf; Heithaus, Michael R.						Fatty acids and stable isotopes as indicators of early-life feeding and potential maternal resource dependency in the bull shark Carcharhinus leucas						MARINE ECOLOGY-PROGRESS SERIES			455				245	256					2012	2012	The degree of reliance of newborn sharks on energy reserves from maternal resource allocation and the timescales over which these animals develop foraging skills are critical factors towards understanding the ecological role of top predators in marine ecosystems. We used muscle tissue stable carbon isotopic composition and fatty acid analysis of bull sharks Carcharhinus leucas to investigate earl…						0			0	0171-8630		CCC:000304607100016
J	de Lussanet, Marc H. E.; Osse, Jan W. M.						An ancestral axial twist explains the contralateral forebrain and the optic chiasm in vertebrates						ANIMAL BIOLOGY			62	2			193	216					2012	2012	Among the best-known facts of the brain are the contralateral visual, auditory, sensational, and motor mappings in the forebrain. How and why did these evolve? The few theories to this question provide functional answers, such as better networks for visuomotor control. However, these theories contradict the data, as discussed here. Instead we propose that a 90-deg turn on the left side evolved in…						0			0	1570-7555		CCC:000304430200007
J	Mann, B. Q.; Pradervand, P.; Maggs, J. Q.; Wintner, S.						A characterisation of the paddle-ski fishery in KwaZulu-Natal, South Africa						AFRICAN JOURNAL OF MARINE SCIENCE			34	1			119	130					2012	2012	The KwaZulu-Natal (KZN) paddle-ski fishery in South Africa consists mainly of light-weight fishing kayaks operated by a single fisher in the marine nearshore environment. The social, economic, management and fisheries parameters of this sector were investigated during the period December 2006-February 2008. Socio-economic data were obtained by means of online and telephone surveys. Effort data we…						0			0	1814-232X		CCC:000304353900010
J	De Schutter, Pieter J.; Wijnker, Erik						Large Centrophorus (Chondrichthyes, Squaliformes) of the Belgian Neogene continental shelf.						GEOLOGICA BELGICA			15	2012-01-02			26	35					2012	2012	A number of isolated teeth of gulper sharks (genus Centrophorus Muller & Henle, 1837) have been recovered from Neogene sands in the Antwerp area, marking the first occurrence of the genus Centrophorus in the fossil record of Belgium and the North Sea Basin. The precise stratigraphic origin of these teeth could not be established, but the taphonomic condition strongly suggests a Late Miocene or Ea…						0			0	1374-8505		WOS:000303958800004
J	Pethybridge, H.; Butler, E. C. V.; Cossa, D.; Daley, R.; Boudou, A.						Trophic structure and biomagnification of mercury in an assemblage of deepwater chondrichthyans from southeastern Australia						MARINE ECOLOGY-PROGRESS SERIES			451				163	174		10.3354/meps09593			2012	2012	Stable isotope ratios of carbon (delta C-13) and nitrogen (delta N-15) were used to evaluate trophic structure and mercury biomagnification in an assemblage of 16 deepwater chondrichthyans (primarily, 2 squaliformes: Centroselachus crepidater and Etmopterus baxteri) collected from continental waters off southeastern Australia from 2004 to 2006. In all species, mean trophic position (TP; quantifie…						0			0	0171-8630		WOS:000303908000012
J	Barnett, Adam; Abrantes, Katya G; Seymour, Jamie; Fitzpatrick, Richard						Residency and spatial use by reef sharks of an isolated seamount and its implications for conservation.						PloS one			7	5			e36574						2012	2012	Although marine protected areas (MPAs) are a common conservation strategy, these areas are often designed with little prior knowledge of the spatial behaviour of the species they are designed to protect. Currently, the Coral Sea area and its seamounts (north-east Australia) are under review to determine if MPAs are warranted. The protection of sharks at these seamounts should be an integral compo…						0			0	1932-6203		MEDLINE:22615782
J	Kubo, Tai; Mitchell, Mark T.; Henderson, Donald M.						ALBERTONECTES VANDERVELDEI, A NEW ELASMOSAUR (REPTILIA, SAUROPTERYGIA) FROM THE UPPER CRETACEOUS OF ALBERTA						JOURNAL OF VERTEBRATE PALEONTOLOGY			32	3			557	572		10.1080/02724634.2012.658124			2012	2012	A new elasmosaurid plesiosaur, Albertonectes vanderveldei, gen. et sp. nov., is described on the basis of an almost complete postcranial skeleton from the upper Campanian, Bearpaw Formation in Alberta, Canada. The new taxon is distinguished by a unique set of characters-76 cervicals, lateral longitudinal ridge on posterior-most cervicals, relatively wide clavicular arch, tapered ventral projectio…						0			0	0272-4634		WOS:000303660400006
J	Raborn, Scott W.; Gallaway, Benny J.; Cole, John G.; Gazey, William J.; Andrews, Kate I.						Effects of Turtle Excluder Devices (TEDs) on the Bycatch of Three Small Coastal Sharks in the Gulf of Mexico Penaeid Shrimp Fishery						NORTH AMERICAN JOURNAL OF FISHERIES MANAGEMENT			32	2			333	345		10.1080/02755947.2012.678962			2012	2012	The stock of blacknose sharks Carcharhinus acronotus in the U.S. South Atlantic and the Gulf of Mexico is overfished, and according to the 2007 stock assessment conducted by the National Marine Fisheries Service overfishing continues to occur. Penaeid shrimp trawl bycatch rates in the Gulf of Mexico were modeled for this species as well as for the Atlantic sharpnose shark Rhizoprionodon terraenov…						0			0	0275-5947		WOS:000303601100014
J	Ajeli, S.; Minapoor, Sh						A relationship between dry-relaxed warp-knitted fabric structure and curling distance						JOURNAL OF THE TEXTILE INSTITUTE			103	5			523	531		10.1080/00405000.2011.589575			2012	2012	This study provides us information about relationship between curling and knitted structure and density of two-guide bar warp-knitted fabrics. Five standard warp-knitted fabrics are produced with three densities (Tricot, Locknit, three-needle Satin, Reveres Locknit and three-needle Sharkskin). Certain cut lengths of sample fabrics in both wale and course direction are analyzed through image proce…						0			0	0040-5000		WOS:000303566300008
J	Thomson, Jordan A.; Heithaus, Michael R.; Burkholder, Derek A.; Vaudo, Jeremy J.; Wirsing, Aaron J.; Dill, Lawrence M.						Site specialists, diet generalists? Isotopic variation, site fidelity, and foraging by loggerhead turtles in Shark Bay, Western Australia						MARINE ECOLOGY-PROGRESS SERIES			453				213	226		10.3354/meps09637			2012	2012	Stable isotope data are useful for inferring foraging and niche variation in marine taxa but can be difficult to interpret, in part because different foraging patterns may result in similar isotopic values. Here, we integrate stable isotope analysis (delta C-13 and delta N-15) with behavioral data to investigate the foraging ecology of loggerhead turtles Caretta caretta on a feeding ground in Sha…						0			0	0171-8630		WOS:000303670200009
J	Marouani, Sondes; Kadri, Hasna; Saidi, Bechir; Morize, Eric; Bouain, Abderrahmen; Bradai, Mohamed Nejmeddine						Age, growth, longevity, natural mortality and maturity of the longnose spurdog, Squalus blainvillei (Chondrichthyes: Squalidae), in the Gulf of Gabes (Central Mediterranean Sea)						CAHIERS DE BIOLOGIE MARINE			53	2			197	204					2012	2012	Age, growth, longevity, natural mortality and size and age at maturity of the longnose spurdog, Squalus blainvillei, in the Gulf of Gabes (Tunisia, Central Mediterranean Sea) are reported. Marginal increment suggested annual band formation. Age estimates ranged from 3 to 15 and 4 to 19 years for males and females, respectively. Von Bertalanffy growth parameters derived from length at age data wer…						0			0	9723-07-01		WOS:000303077600006
J	Izawa, Kunihiko						ECHTHROGALEUS MITSUKURINAE SP NOV (COPEPODA, SIPHONOSTOMATOIDA, PANDARIDAE) INFESTING THE GOBLIN SHARK MITSUKURINA OWSTONI JORDAN, 1898 IN JAPANESE WATERS						CRUSTACEANA			85	1			81	87		10.1163/156854012X623674			2012-01-01	2012	Echthrogaleus mitsukurinae sp. nov. (Copepoda, Siphonostomatoida, Pandaridae) is described based on a female recovered from the body surface of the goblin shark, Mitsukurina owstoni Jordan, 1898, captured on the slope of the Tokyo Canyon at about 400 m depth in Tokyo Bay, Japan. This new species is easily distinguishable from all its congeners in having the following unique features in the female…						0			0	0011-216X		WOS:000303143400006
J	Drew, Michelle M.; Hartnoll, Richard G.; Hansson, Bill S.						AN IMPROVED MARK-RECAPTURE METHOD USING PASSIVE INTEGRATED TRANSPONDER (PIT) TAGS IN BIRGUS LATRO (LINNAEUS, 1767) (DECAPODA, ANOMURA)						CRUSTACEANA			85	1			89	102		10.1163/156854012X623656			2012-01-01	2012	The effectiveness of Passive Integrated Transponders (PIT tags) was investigated in the robber or coconut crab, Birgus latro. A pilot study was conducted in Chumbe Island, Zanzibar, and a definitive study on Christmas Island, Indian Ocean. No mortality or adverse behaviour was recorded as a result of PIT tagging. On Christmas Island 1150 crabs were tagged in 2009 and 2010. In the period to April …						0			0	0011-216X		WOS:000303143400007
J	Bode, Michael; Brennan, Karl E. C.; Morris, Keith; Burrows, Neil; Hague, Neville						Choosing cost-effective locations for conservation fences in the local landscape						WILDLIFE RESEARCH			39	3			192	201		10.1071/WR11106			2012	2012	Context. Exclosure fences are widely used to reintroduce locally extinct animals. These fences function either as permanent landscape-scale areas free from most predators, or as small-scale temporary acclimatisation areas for newly translocated individuals to be 'soft released' into the wider landscape. Existing research can help managers identify the best design for their exclosure fence, but th…						0			0	1035-3712		WOS:000303124600002
B	Zhebentyayeva, Tatyana; Ledbetter, Craig; Burgos, Lorenzo; Llacer, Gerardo				Badenes, ML; Byrne, DH		Apricot						Fruit Breeding	Handbook of Plant Breeding						415	458		10.1007/978-1-4419-0763-9_12			2012	2012	Apricot is in the Rosaceae family within the genus Prunus L., subgenus Prunophora Focke, and the section Armeniaca (Lam.) Koch. Depending on the classification system, the number of apricot species ranges from 3 to 12. Six distinct species are usually recognized: P. brigantina Vill., P. holosericeae Batal, P. armeniaca L., P. mandshurica (Maxim), P. sibirica L., Japanese apricot P. mume (Sieb.) S…						0			0		978-1-4419-0762-2(H)	BCI:BCI201200359507
B	Topp, Bruce L.; Russell, Dougal M.; Neumueller, Michael; Dalbo, Marco A.; Liu, Weisheng				Badenes, ML; Byrne, DH		Plum						Fruit Breeding	Handbook of Plant Breeding						571	621		10.1007/978-1-4419-0763-9_15			2012	2012	There are 19-40 species of plum, depending on taxonomist, that have originated in Europe, Asia and America. From this great diversity only two species, the hexaploid European plum (Prunus domestica) and the diploid Japanese plum (P salicina and hybrids), are of worldwide commercial significance. The European plums were cultivated in Roman times and stone remnants indicate human use 6,000 years ag…						0			0		978-1-4419-0762-2(H)	BCI:BCI201200359510
J	Patra, Debabrata; Sandell, Linda J						Antiangiogenic and anticancer molecules in cartilage.						Expert reviews in molecular medicine			14				e10						2012 Jan 19	2012	Cartilage is one of the very few naturally occurring avascular tissues where lack of angiogenesis is the guiding principle for its structure and function. This has attracted investigators who have sought to understand the biochemical basis for its avascular nature, hypothesising that it could be used in designing therapies for treating cancer and related malignancies in humans through antiangioge…						0			0	1462-3994		MEDLINE:22559283
J	Garrone Neto, Domingos; Uieda, Virginia Sanches						Activity and habitat use of two species of stingrays (Myliobatiformes: Potamotrygonidae) in the upper Parana River basin, Southeastern Brazil						NEOTROPICAL ICHTHYOLOGY			10	1			81	88					JAN-MAR 2012	2012	The life history of freshwater stingrays (Potamotrygonidae) under natural conditions has been poorly documented. In this study, we investigated the period of activity and the habitat use of two species of the genus Potamotrygon in the upper Parana River basin, Southeastern Brazil. Potamotrygon falkneri and P. motoro are similar to each other as far as the analyzed behavior is concerned. Individua…						0			0	1679-6225		WOS:000302926400008
J	Shibuya, Akemi; Zuanon, Jansen; Tanaka, Sho						Feeding behavior of the Neotropical freshwater stingray Potamotrygon motoro (Elasmobranchii: Potamotrygonidae)						NEOTROPICAL ICHTHYOLOGY			10	1			189	196					JAN-MAR 2012	2012	The feeding mechanisms of elasmobranchs and their functioning have been receiving growing scientific attention, although less emphasis has yet to be directed towards batoid species. The present study investigated the use of orobranchial musculature during prey capture and processing behavior in Potamotrygon motor. Ten orobranchial muscle groups were removed to determine their relative biomasses. …						0			0	1679-6225		WOS:000302926400018
J	Cupello, Camila D.; Bermudez-Rochas, David D.; Martill, David M.; Brito, Paulo M.						The Hybodontiformes (Chondrichthyes: Elasmobranchii) from the Missao Velha Formation (?Lower Cretaceous) of the Araripe Basin, North-East Brazil						COMPTES RENDUS PALEVOL			11	1			41	47		10.1016/j.crpv.2011.09.005			JAN-FEB 2012	2012	The ?Early Cretaceous (pre-Aptian) Missao Velha Formation of the Araripe Basin of North-East Brazil yields remains referred to two hybodontiform shark taxa: the hybodontid Planohybodus and the lonchidiid Parvodus. Paleoenvironmental analysis of this formation suggests freshwater or perhaps brackish deposition. The specimens described here were collected from a new locality and are found in associ…						0			0	1631-0683		WOS:000302504600006
J	Mobberley, Jennifer M.; Ortega, Maya C.; Foster, Jamie S.						Comparative microbial diversity analyses of modern marine thrombolitic mats by barcoded pyrosequencing						ENVIRONMENTAL MICROBIOLOGY			14	1	SI		82	100		10.1111/j.1462-2920.2011.02509.x			2012-01-01	2012	Thrombolites are unlaminated carbonate structures that form as a result of the metabolic interactions of complex microbial mat communities. Thrombolites have a long geological history; however, little is known regarding the microbes associated with modern structures. In this study, we use a barcoded 16S rRNA gene-pyrosequencing approach coupled with morphological analysis to assess the bacterial,…						1			1	1462-2912		WOS:000302538900008
J	Brawley, Sean						'Can You Imagine the Shire Without the Sharks!?': Building the Community Capital of the Cronulla-Sutherland Rugby League Club - From 1967 to the Eve of Super League in 1996						INTERNATIONAL JOURNAL OF THE HISTORY OF SPORT			29	3	SI		492	508		10.1080/09523367.2012.662585			2012	2012	The relationships between sporting clubs and their geographical communities are far from straightforward. Using the Australian National Rugby League team the Cronulla-Sutherland Sharks as a case study, this article explores such relationships through the notion of 'community capital'. Central to building such capital is the construction of 'legends' that connect the club to the community. Accordi…						0			0	0952-3367		WOS:000302614400006
S	Scholz, Steffen G.; Kolew, Alexander; Griffiths, Christian				Bachmann, FG; Pfleging, W; Washio, K; Amako, J; Hoving, W; Lu, Y		Laser structuring of metallic mold inserts by using mu s, ns, and ps-laser ablation						LASER-BASED MICRO- AND NANOPACKAGING AND ASSEMBLY VI	Proceedings of SPIE		8244						UNSP 82440J	10.1117/12.910006			2012	2012	Bio-inspired surfaces targeting functional characteristics such as anti-reflectivity, self-cleaning effects or a drag reduction are of significant interest to industry. In this feasibility study, process chains for the mass production of so-called shark skin structured surfaces are investigated. Due to their drag reduction properties, such bio-inspired surfaces are of relevance to a number of app…		Conference on Laser-Based Micro- and Nanopackaging and Assembly VI (LBMP)/Photonics West (LASE)	JAN 24-26, 2012	SPIE	San Francisco, CA	0			0	0277-786X	978-0-8194-8887-9	WOS:000302547300017
J	Delaney, David G; Johnson, Ryan; Bester, Marthan N; Gennari, Enrico						Accuracy of using visual identification of white sharks to estimate residency patterns.						PloS one			7	4			e34753						2012	2012	Determining the residency of an aquatic species is important but challenging and it remains unclear what is the best sampling methodology. Photo-identification has been used extensively to estimate patterns of animals' residency and is arguably the most common approach, but it may not be the most effective approach in marine environments. To examine this, in 2005, we deployed acoustic transmitter…						0			0	1932-6203		MEDLINE:22514662
J	Catlin, James; Jones, Tod; Jones, Roy						Balancing commercial and environmental needs: licensing as a means of managing whale shark tourism on Ningaloo reef						JOURNAL OF SUSTAINABLE TOURISM			20	2			163	178		10.1080/09669582.2011.602686			2012	2012	This paper explores the creation, significance and progression of the licensing systems employed to regulate whale shark tourism at Ningaloo Marine Park. Since 1993 mandatory whale shark tour operator licences have been offered through an evolving competitive tender process. A content analysis of the evolution of licence requirements revealed a progression from a minimalist approach to one coveri…						1			1	0966-9582		WOS:000302146300001
J	Andreev, Plamen S.; Cuny, Gilles						NEW TRIASSIC STEM SELACHIMORPHS (CHONDRICHTHYES, ELASMOBRANCHII) AND THEIR BEARING ON THE EVOLUTION OF DENTAL ENAMELOID IN NEOSELACHII						JOURNAL OF VERTEBRATE PALEONTOLOGY			32	2			255	266		10.1080/02724634.2012.644646			2012	2012	This study identifies three new neoselachian tooth taxa from the Middle and Upper Triassic. On the basis of morphological and histological characters, Rhomaleodus budurovi, nov. gen. et sp. (Anisian of Bulgaria), is resolved as stem selachimorph, with an additional specimen from the same stratigraphic level assigned to Synechodus sp. Selachimorph grade of enameloid microstructural organization (c…						0			0	0272-4634		WOS:000302179200002
J	Campbell, Hamish A.; Hewitt, Matthew; Watts, Matthew E.; Peverell, Stirling; Franklin, Craig E.						Short- and long-term movement patterns in the freshwater whipray (Himantura dalyensis) determined by the signal processing of passive acoustic telemetry data						MARINE AND FRESHWATER RESEARCH			63	4			341	350		10.1071/MF11229			2012	2012	Patterns of movement in aquatic animals reflect ecologically important behaviours. Cyclical changes in the abiotic environment influence these movements, but when multiple processes occur simultaneously, identifying which is responsible for the observed movement can be complex. Here we used acoustic telemetry and signal processing to define the abiotic processes responsible for movement patterns …						0			0	1323-1650		WOS:000302356200005
J	Smale, Malcolm J.; Booth, Anthony J.; Farquhar, Michael R.; Meyer, Michael R.; Rochat, Lesley						Migration and habitat use of formerly captive and wild raggedtooth sharks (Carcharias taurus) on the southeast coast of South Africa						MARINE BIOLOGY RESEARCH			8	2			115	128		10.1080/17451000.2011.617756			2012	2012	Releasing aquarium-held sharks when no longer needed by the holding institution may help mitigate the impacts that aquaria have on declining wild populations. To investigate the viability of releasing display specimens, four raggedtooth sharks (Carcharias taurus) that had been held at Two Oceans Aquarium, Cape Town were released back to the wild between 2004 and 2008. To test the hypothesis that …						0			0	1745-1000		WOS:000302437000002
J	Kundu, Jiban Kumar; Chod, Jiri						Assoc. Prof. Ing. JAROSLAV POLAK, DrSc. - septuagenarian						PLANT PROTECTION SCIENCE			48	1			51	52					2012	2012							0			0	1212-2580		WOS:000302383700008
J	Dolganov, V. N.						The capture of a great white shark Carcharodon carcharias Linnaeus, 1758 (Carcharodontidae) in peter the Great Bay (Sea of Japan)						RUSSIAN JOURNAL OF MARINE BIOLOGY			38	1			88	90		10.1134/S106307401201004X			2012-01-01	2012	This paper reports on the first reliable capture of the Great White shark Carcharodon carcharias (length 126 cm, weight 16 kg) in Peter the Great Bay (Sea of Japan). Capture records of C. carcharias in the Far-Eastern seas of Russia are discussed.						0			0	1063-0740		WOS:000302261500010
J	Chirkov, S. N.; Byzova, N. A.; Sheveleva, A. A.; Mitrofanova, I. V.; Prikhod'ko, Yu N.; Dzantiev, B. B.; Atabekov, I. G.						LARGE-SCALE TESTING OF LATERAL FLOW DEVICES FOR THE ON-SITE Plum pox virus DETECTION						Sel'skokhozyaistvennaya Biologiya				1			110	116					JAN-FEB 2012	2012	For the first time Plum pox virus (PPV) genetic diversity has been studied in Russia. PPV isolates belonging to the D, M, C and W strains were found and identified by ELISA and immunocapture reverse-transcription polymerase chain reaction. The large-scale testing of lateral flow devices (test-strips) developed for the on-site PPV detection was carried out using samples infected with different PPV…						0			0	0131-6397		BCI:BCI201200309913
J	Pinhal, Danillo; Shivji, Mahmood S; Nachtigall, Pedro G; Chapman, Demian D; Martins, Cesar						A streamlined DNA tool for global identification of heavily exploited coastal shark species (genus Rhizoprionodon).						PloS one			7	4			e34797						2012	2012	Obtaining accurate species-specific landings data is an essential step toward achieving sustainable shark fisheries. Globally distributed sharpnose sharks (genus Rhizoprionodon) exhibit life-history characteristics (rapid growth, early maturity, annual reproduction) that suggests that they could be fished in a sustainable manner assuming an investment in monitoring, assessment and careful managem…						0			0	1932-6203		MEDLINE:22496864
J	Wiwanitkit, Viroj						Shark island pedicle flap for repairing of basal cell carcinoma.						Anais brasileiros de dermatologia			87	1			169						2012 Jan-Feb	2012							0			0	1806-4841		MEDLINE:22481677
J	Courtenay, Glenn; Smith, Derek R; Gladstone, William						Occupational health issues in marine and freshwater research.						Journal of occupational medicine and toxicology (London, England)			7	1			4						2012 Mar 19	2012	ABSTRACT: Marine and freshwater scientists are potentially exposed to a wide variety of occupational hazards. Depending on the focus of their research, risks may include animal attacks, physiological stresses, exposure to toxins and carcinogens, and dangerous environmental conditions. Many of these hazards have been investigated amongst the general population in their recreational use of the envi…						0			0	1745-6673		MEDLINE:22429712
J	Cardona, Luis; Alvarez de Quevedo, Irene; Borrell, Assumpcio; Aguilar, Alex						Massive consumption of gelatinous plankton by Mediterranean apex predators.						PloS one			7	3			e31329						2012	2012	Stable isotopes of carbon and nitrogen were used to test the hypothesis that stomach content analysis has systematically overlooked the consumption of gelatinous zooplankton by pelagic mesopredators and apex predators. The results strongly supported a major role of gelatinous plankton in the diet of bluefin tuna (Thunnus thynnus), little tunny (Euthynnus alletteratus), spearfish (Tetrapturus belo…						0			0	1932-6203		MEDLINE:22470416
J	Vianna, G. M. S.; Meekan, M. G.; Pannell, D. J.; Marsh, S. P.; Meeuwig, J. J.						Socio-economic value and community benefits from shark-diving tourism in Palau: A sustainable use of reef shark populations						BIOLOGICAL CONSERVATION			145	1			267	277		10.1016/j.biocon.2011.11.022			2012-01-01	2012	Arguments for conservation of sharks based on their role in the maintenance of healthy marine ecosystems have failed to halt the worldwide decline in populations. Instead, the value of sharks as a fishery commodity has severely reduced the abundance of these animals. Conservation may be assisted by the development of an alternative approach that emphasizes the economic value of sharks as a non-ha…						0			0	3207-06-01		WOS:000301092400034
J	Neff, Christopher						Australian Beach Safety and the Politics of Shark Attacks						COASTAL MANAGEMENT			40	1			88	106		10.1080/08920753.2011.639867			2012	2012	There are no simple government solutions when sharks bite people. These rare and sometimes fatal incidents are fraught with uncertainties and command a disproportionate amount of psychological space in the minds of the public, as well as a large degree of policy space and funding from many governments. Responses to mitigate shark bite incidents involve public policies that contend with the needs …						0			0	0892-0753		WOS:000301717400006
J	Wozniak, Jeffrey R.; Anderson, William T.; Childers, Daniel L.; Gaiser, Evelyn E.; Madden, Christopher J.; Rudnick, David T.						Potential N processing by southern Everglades freshwater marshes: Are Everglades marshes passive conduits for nitrogen?						ESTUARINE COASTAL AND SHELF SCIENCE			96				60	68		10.1016/j.ecss.2011.08.024			JAN 1 2012	2012	The degree of hydrological connectivity in wetlands plays a vital role in determining the flux of energy, material, and nutrients across these wet landscapes. During the last century, compartmentalization of hydrologic flows in the Florida Everglades by canals and levees has had a profound impact on the natural timing and supply of freshwater and nutrients across the southern Everglades. Nitrogen…						0			0	0272-7714		WOS:000300484500007
J	Bond, Mark E; Babcock, Elizabeth A; Pikitch, Ellen K; Abercrombie, Debra L; Lamb, Norlan F; Chapman, Demian D						Reef sharks exhibit site-fidelity and higher relative abundance in marine reserves on the Mesoamerican Barrier Reef.						PloS one			7	3			e32983						2012	2012	Carcharhinid sharks can make up a large fraction of the top predators inhabiting tropical marine ecosystems and have declined in many regions due to intense fishing pressure. There is some support for the hypothesis that carcharhinid species that complete their life-cycle within coral reef ecosystems, hereafter referred to as "reef sharks", are more abundant inside no-take marine reserves due to …						0			0	1932-6203		MEDLINE:22412965
J	Jeffries, T. C.; Seymour, J. R.; Newton, K.; Smith, R. J.; Seuront, L.; Mitchell, J. G.						Increases in the abundance of microbial genes encoding halotolerance and photosynthesis along a sediment salinity gradient						BIOGEOSCIENCES			9	2			815	825		10.5194/bg-9-815-2012			2012	2012	Biogeochemical cycles are driven by the metabolic activity of microbial communities, yet the environmental parameters that underpin shifts in the functional potential coded within microbial community genomes are still poorly understood. Salinity is one of the primary determinants of microbial community structure and can vary strongly along gradients within a variety of habitats. To test the hypot…						0			0	1726-4170		WOS:000300877400014
J	Matich, Philip; Heithaus, Michael R.						Effects of an extreme temperature event on the behavior and age structure of an estuarine top predator, Carcharhinus leucas						MARINE ECOLOGY-PROGRESS SERIES			447				165	178		10.3354/meps09497			2012	2012	The frequency of extreme environmental events is predicted to increase in the future. Understanding the short- and long-term impacts of these extreme events on large-bodied predators will provide insight into the spatial and temporal scales at which acute environmental disturbances in top-down processes may persist within and across ecosystems. Here, we use long-term studies of movements and age …						0			0	0171-8630		WOS:000300660600012
J	Queiroz, Nuno; Humphries, Nicolas E; Noble, Leslie R; Santos, Antonio M; Sims, David W						Spatial dynamics and expanded vertical niche of blue sharks in oceanographic fronts reveal habitat targets for conservation.						PloS one			7	2			e32374						2012	2012	Dramatic population declines among species of pelagic shark as a result of overfishing have been reported, with some species now at a fraction of their historical biomass. Advanced telemetry techniques enable tracking of spatial dynamics and behaviour, providing fundamental information on habitat preferences of threatened species to aid conservation. We tracked movements of the highest pelagic fi…						0			0	1932-6203		MEDLINE:22393403
J	Jagt, J. W. M.; Donovan, S. K.; Jagt-Yazykova, E. A.						Fossils of the type Maastrichtian						Scripta Geologica				Sp. Iss. 8			1	4					2012	2012							0			0	0375-7587		BCI:BCI201200239416
J	Ishikawa, Yuji; Yamamoto, Naoyuki; Yoshimoto, Masami; Ito, Hironobu						The Primary Brain Vesicles Revisited: Are the Three Primary Vesicles (Forebrain/Midbrain/Hindbrain) Universal in Vertebrates?						BRAIN BEHAVIOR AND EVOLUTION			79	2			75	83		10.1159/000334842			2012	2012	It is widely held that three primary brain vesicles (forebrain, midbrain, and hindbrain vesicles) develop into five secondary brain vesicles in all vertebrates (von Baer's scheme). We reviewed previous studies in various vertebrates to see if this currently accepted scheme of brain morphogenesis is a rule applicable to vertebrates in general. Classical morphological studies on lamprey, shark, zeb…						0			0	8977-06-01		WOS:000300274000002
J	Balmaceda-Aguilera, Carolina; Cortes-Campos, Christian; Cifuentes, Manuel; Peruzzo, Bruno; Mack, Lauren; Tapia, Juan Carlos; Oyarce, Karina; Garcia, Maria Angeles; Nualart, Francisco						Glucose transporter 1 and monocarboxylate transporters 1, 2, and 4 localization within the glial cells of shark blood-brain-barriers.						PloS one			7	2			e32409						2012	2012	Although previous studies showed that glucose is used to support the metabolic activity of the cartilaginous fish brain, the distribution and expression levels of glucose transporter (GLUT) isoforms remained undetermined. Optic/ultrastructural immunohistochemistry approaches were used to determine the expression of GLUT1 in the glial blood-brain barrier (gBBB). GLUT1 was observed solely in glial …						0			0	1932-6203		MEDLINE:22389700
J	Braccini, Matias; Van Rijn, Jay; Frick, Lorenz						High post-capture survival for sharks, rays and chimaeras discarded in the main shark fishery of Australia?						PloS one			7	2			e32547						2012	2012	Most sharks, rays and chimaeras (chondrichthyans) taken in commercial fisheries are discarded (i.e. returned to the ocean either dead or alive). Quantifying the post-capture survival (PCS) of discarded species is therefore essential for the improved management and conservation of this group. For all chondrichthyans taken in the main shark fishery of Australia, we quantified the immediate PCS of i…						0			0	1932-6203		MEDLINE:22384270
J	Kim, Se-Kwon; Karadeniz, Fatih						Biological importance and applications of squalene and squalane.						Advances in food and nutrition research			65				223	33					2012	2012	Squalene is a polyunsaturated hydrocarbon with a formula of C(30)H(50). Squalene can be found in certain fish oils, especially shark liver oil, in high amounts and some vegetable oils in relatively smaller amounts. Human sebum also contains 13% squalene as one of its major constituents. Squalane is a saturated derivative of squalene and also found in these sources. Interest in squalene has been r…						0			0	1043-4526		MEDLINE:22361190
J	Barbini, Santiago A.; Lucifora, Luis O.						Feeding habits of a large endangered skate from the south-west Atlantic: the spotback skate, Atlantoraja castelnaui						MARINE AND FRESHWATER RESEARCH			63	2			180	188		10.1071/MF11170			2012	2012	Elasmobranch predation has important effects on marine ecosystems. Identifying the main correlates of the feeding habits of skates is of paramount importance for determining their ecological role. We tested the hypotheses that the diet of the spotback skate, Atlantoraja castelnaui, off Uruguay and northern Argentina, changes with increasing body size, between seasons and regions and that prey siz…						0			0	1323-1650		WOS:000299891100010
J	Carlisle, Aaron B; Kim, Sora L; Semmens, Brice X; Madigan, Daniel J; Jorgensen, Salvador J; Perle, Christopher R; Anderson, Scot D; Chapple, Taylor K; Kanive, Paul E; Block, Barbara A						Using stable isotope analysis to understand the migration and trophic ecology of northeastern Pacific white sharks (Carcharodon carcharias).						PloS one			7	2			e30492						2012	2012	The white shark (Carcharodon carcharias) is a wide-ranging apex predator in the northeastern Pacific (NEP). Electronic tagging has demonstrated that white sharks exhibit a regular migratory pattern, occurring at coastal sites during the late summer, autumn and early winter and moving offshore to oceanic habitats during the remainder of the year, although the purpose of these migrations remains un…						0			0	1932-6203		MEDLINE:22355313
J	Enajjar, Samira; Bradai, Mohamed Nejmeddine; Bouain, Abderrahman						Age, growth and sexual maturity of the blackchin guitarfish Rhinobatos cemiculus in the Gulf of Gabes (southern Tunisia, central Mediterranean)						CAHIERS DE BIOLOGIE MARINE			53	1			17	23					2012	2012	Age, growth and sexual maturity parameters of the Blackchin guitarfish Rhinobatos cemiculus are reported from the Gulf of Gabes (Central Mediterranean Sea). Age was estimated by counting the growth rings of thin sections of vertebrae from 110 fishes (43-198 cm total length). Marginal increment analysis supported the hypothesis of annual deposition of growth rings, which form during the end of sum…						0			0	9723-07-01		WOS:000299862000002
J	Mnasri, Nejia; El Kamel, Olfa; Boumaiza, Moncef; Reynaud, Christian; Capape, Christian						Food and feeding habits of the small-spotted catshark, Scyliorhinus canicula (Chondrichthyes : Scyliorhinidae) from the northern coast of Tunisia (central Mediterranean)						CAHIERS DE BIOLOGIE MARINE			53	1			139	150					2012	2012	Food and feeding habits of the small-spotted catshark, Scyliorhinus canicula (Linnaeus, 1758) from the northern coast of Tunisia (central Mediterranean) were studied in relation to sex, size and seasons. Of the 1125 stomach contents examined between March 2009 and February 2010, only 150 were empty, with vacuity index VI = 13.33%, percentage that significantly changed with sex. Eight zoological g…						0			0	9723-07-01		WOS:000299862000014
J	Hansen, Anlaug Adland; Rodbotten, Marit; Eie, Thomas; Lea, Per; Rudi, Knut; Morkore, Turid						The Effect of Crowding Stress on Bacterial Growth and Sensory Properties of Chilled Atlantic Salmon Fillets						JOURNAL OF FOOD SCIENCE			77	1			S84	S90		10.1111/j.1750-3841.2011.02513.x			2012-01-01	2012	Atlantic salmon were subjected to minimal preslaughter crowding stress (Control), short-term crowding for 20 min (SS-group), or long-term crowding for 24 h (LS-group). The fish were filleted prerigor, cut into 270 g pieces, and packaged in modified atmosphere (60% CO2 and 40% N2). Fillet quality analyses were determined during 22 d of storage at 0.3 degrees C. Bacterial growth and unpleasant sens…						0			0	0022-1147		WOS:000299257000075
J	Chen, Po-Yu; Schirer, Jeffrey; Simpson, Amanda; Nay, Richard; Lin, Yen-Shan; Yang, Wen; Lopez, Maria I.; Li, Jianan; Olevsky, Eugene A.; Meyers, Marc A.						Predation versus protection: Fish teeth and scales evaluated by nanoindentation						JOURNAL OF MATERIALS RESEARCH			27	1			100	112		10.1557/jmr.2011.332			2012-01-01	2012	Most biological materials are hierarchically structured composites that often possess exceptional mechanical properties. We show that nanoindentation can be a powerful tool for understanding the structure-mechanical property relationship of biological materials and illustrate this for fish teeth and scales, not heretofore investigated at the nanoscale. Piranha and shark teeth consist of enameloid…						1			1	0884-2914		WOS:000299876800013
J	Hunsicker, Mary E.; Olson, Robert J.; Essington, Timothy E.; Maunder, Mark N.; Duffy, Leanne M.; Kitchell, James F.						Potential for top-down control on tropical tunas based on size structure of predator-prey interactions						MARINE ECOLOGY-PROGRESS SERIES			445				263	U535		10.3354/meps09494			2012	2012	The ecological consequences of widespread fisheries-induced reductions of large pelagic predators are not fully understood. Tropical tunas are considered a main component of apex predator guilds that include sharks and billfishes, and thus may seem unsusceptible to secondary effects of fishing top predators. However, intra-guild predation can occur because of size-structured interactions. We comp…						0			0	0171-8630		WOS:000299384100021
J	Guttridge, Tristan L.; Gruber, Samuel H.; Franks, Bryan R.; Kessel, Steven T.; Gledhill, Katie S.; Uphill, Jen; Krause, Jens; Sims, David W.						Deep danger: intra-specific predation risk influences habitat use and aggregation formation of juvenile lemon sharks Negaprion brevirostris						MARINE ECOLOGY-PROGRESS SERIES			445				279	291		10.3354/meps09423			2012	2012	Non-consumptive or risk effects imposed by predators can influence prey behaviour over different spatio-temporal scales. Prey vulnerability to predation can also be dependent on abiotic conditions, such as tidal height. We conducted direct field observations of juvenile lemon sharks Negaprion brevirostris in a tidally influenced mangrove-inlet. We also used acoustic tracking to determine the move…						0			0	0171-8630		WOS:000299384100022
J	McClenachan, Loren; Cooper, Andrew B.; Carpenter, Kent E.; Dulvy, Nicholas K.						Extinction risk and bottlenecks in the conservation of charismatic marine species						CONSERVATION LETTERS			5	1			73	80		10.1111/j.1755-263X.2011.00206.x			2012-01-01	2012	The oceans face a biodiversity crisis, but the degree and scale of extinction risk remains poorly characterized. Charismatic species are most likely to garner greatest support for conservation and thus provide a best-case scenario of the status of marine biodiversity. We summarize extinction risk and diagnose impediments to successful conservation for 1,568 species in 16 families of marine animal…						0			0	1755-263X		WOS:000299468900009
J	Martinho, Filipe; Sa, Catia; Falcao, Joana; Cabral, Henrique Nogueira; Pardal, Miguel Angelo						Comparative feeding ecology of two elasmobranch species, Squalus blainville and Scyliorhinus canicula, off the coast of Portugal						FISHERY BULLETIN			110	1			71	84					2012-01-01	2012	The small-spotted catshark (Scyliorhinus canicula) (Linnaeus, 1758) and the longnose spurdg (Squalus blainville) (Risso, 1826) are two species occurring in the European and western African continental shelves with a wide geographical distribution. In this study, the diet of S. blainville and S. canicula off the Portuguese western Atlantic coast was investigated in 2006 by collecting monthly sampl…						0			0	0090-0656		WOS:000299406200006
J	Fenchel, Tom; Uiblein, Franz						Marine Biology Research - with good performance towards new shores!						MARINE BIOLOGY RESEARCH			8	1			1	2		10.1080/17451000.2011.623704			2012	2012							0			0	1745-1000		WOS:000299033900001
J	Lee, Won Je						Free-living benthic heterotrophic euglenids from Botany Bay, Australia						MARINE BIOLOGY RESEARCH			8	1			3	27		10.1080/17451000.2011.596545			2012	2012	Sixty-two species from 12 genera of heterotrophic euglenids (Euglenozoa, Protista) were found during a long-term, intensive study of marine sediments in Botany Bay (Australia). Of the 62 species, 44 are described with uninterpreted records based on light microscopy. The records include accounts of seven unidentified taxa and one new taxon (Petalomonas gini sp. nov.). Most euglenid flagellates des…						0			0	1745-1000		WOS:000299033900002
J	Martin, R. Aidan; Hammerschlag, Neil						Marine predator-prey contests: Ambush and speed versus vigilance and agility						MARINE BIOLOGY RESEARCH			8	1			90	94		10.1080/17451000.2011.614255			2012	2012	Differences in relative strengths and weaknesses between predators and prey under tactical contexts result in complex and dynamic contests between them. These contests are often brief and difficult to observe in marine systems. Here, we employ basic principles of underwater optics and physics to provide a conceptual understanding of mechanisms underlying predator-prey interactions between white s…						1			1	1745-1000		WOS:000299033900008
J	Hannan, Kristin M.; Driggers, William B., III; Hanisko, David S.; Jones, Lisa M.; Canning, Amanda B.						DISTRIBUTION OF THE NURSE SHARK, GINGLYMOSTOMA CIRRATUM, IN THE NORTHERN GULF OF MEXICO						BULLETIN OF MARINE SCIENCE			88	1			73	80		10.5343/bms.2011.1033			2012-01-01	2012	The distribution of nurse sharks, Ginglymostoma cirratum (Bonaterre, 1778), in the northern Gulf of Mexico was examined using fisheries-independent bottom longline data collected from 1995 to 2009. Results indicate that nurse sharks are most abundant in the eastern Gulf of Mexico and their occurrence is relatively rare west of the Mississippi River Delta. While the eastern Gulf of Mexico had sign…						0			0	4977-07-01		WOS:000299355600007
J	Levin, Phillip S.; Horne, Peter; Andrews, Kelly S.; Williams, Greg						An empirical movement model for sixgill sharks in Puget Sound: Combining observed and unobserved behavior						CURRENT ZOOLOGY			58	1			103	115					2012	2012	Understanding the movement of animals is fundamental to population and community ecology. Historically, it has been difficult to quantify movement patterns of most fishes, but technological advances in acoustic telemetry have increased our abilities to monitor their movement. In this study, we combined small-scale active acoustic tracking with large-scale passive acoustic monitoring to develop an…						0			0	1674-5507		WOS:000299204400012
J	Trudeau, Vance L.; Martyniuk, Christopher J.; Zhao, E.; Hu, Hongxia; Volkoff, Helene; Decatur, Wayne A.; Basak, Ajoy						Is secretoneurin a new hormone?						GENERAL AND COMPARATIVE ENDOCRINOLOGY			175	1			10	18		10.1016/j.ygcen.2011.10.008			JAN 1 2012	2012	Numerous small potentially bioactive peptides are derived from the selective processing of the similar to 600 amino acid secretogranin II (SgII) precursor, but only the 31-42 amino acid segment termed secretoneurin (SN) is well-conserved from sharks to mammals. Both SNa and SNb paralogs have been identified in some teleosts, likely arising as a result of the specific genome duplication event in t…						0			0	0016-6480		WOS:000299065800002
J	Zavalaga, Carlos B.; Emslie, Steven D.; Estela, Felipe A.; Mueller, Martina S.; Dell'Omo, Giacomo; Anderson, David J.						Overnight foraging trips by chick-rearing Nazca Boobies Sula granti and the risk of attack by predatory fish						IBIS			154	1			61	73		10.1111/j.1474-919X.2011.01198.x			2012-01-01	2012	Most tropical booby species complete breeding foraging trips within daylight hours, thus avoiding nights at sea. Nazca Boobies Sula granti are unusual in this respect, frequently spending one or more nights away from the nest. We used GPS dataloggers, time-depth recorders, and changes in body weight to characterize foraging trips and to evaluate potential influences on the decisions of 64 adult N…						0			0	0019-1019		WOS:000298333400008
J	Hickey, Anthony J. R.; Renshaw, Gillian M. C.; Speers-Roesch, Ben; Richards, Jeffrey G.; Wang, Yuxiang; Farrell, Anthony P.; Brauner, Colin J.						A radical approach to beating hypoxia: depressed free radical release from heart fibres of the hypoxia-tolerant epaulette shark (Hemiscyllum ocellatum)						JOURNAL OF COMPARATIVE PHYSIOLOGY B-BIOCHEMICAL SYSTEMIC AND ENVIRONMENTAL PHYSIOLOGY			182	1			91	100		10.1007/s00360-011-0599-6			2012-01-01	2012	Hypoxia and warm ischemia are primary concerns in ischemic heart disease and transplant and trauma. Hypoxia impacts tissue ATP supply and can induce mitochondrial dysfunction that elevates reactive species release. The epaulette shark, Hemiscyllum ocellatum, is remarkably tolerant of severe hypoxia at temperatures up to 34 degrees C, and therefore provides a valuable model to study warm hypoxia t…						0			0	0174-1578		WOS:000299332000006
J	Alifrangis, Constantine; Stebbing, Justin						Shark cartilage: has the popularisation of science failed?						LANCET ONCOLOGY			13	1			22	22					2012-01-01	2012							0			0	1470-2045		WOS:000299014500039
J	Casper, Brandon M; Halvorsen, Michele B; Popper, Arthur N						Are sharks even bothered by a noisy environment?						Advances in experimental medicine and biology			730				93	7					2012	2012	Elasmobranch fishes have been around for hundreds of millions of years with very little evolutionary changes, yet our understanding of their hearing abilities is limited to only a few of the hundreds of extant species. Our general understanding suggests a relatively narrow hearing range with relatively poor sensitivity, particularly compared with many teleosts. This lack of knowledge makes it dif…						0			0	0065-2598		MEDLINE:22278457
J	Stahl, Maximilian; Stahl, Klaus; Brubacher, Marie B.; Forrest, John N., Jr.						Divergent CFTR orthologs respond differently to the channel inhibitors CFTRinh-172, glibenclamide, and GlyH-101						AMERICAN JOURNAL OF PHYSIOLOGY-CELL PHYSIOLOGY			302	1			C67	C76		10.1152/ajpcell.00225.2011			2012-01-01	2012	Stahl M, Stahl K, Brubacher MB, Forrest JN Jr. Divergent CFTR orthologs respond differently to the channel inhibitors CFTRinh-172, glibenclamide, and GlyH-101. Am J Physiol Cell Physiol 302: C67-C76, 2012. First published September 21, 2011; doi:10.1152/ajpcell.00225.2011.-Comparison of diverse orthologs is a powerful tool to study the structure and function of channel proteins. We investigated t…						1			1	0363-6143		WOS:000298374100010
J	Kim, Seon-Bong; Ji, Cheong-Il; Woo, Jin-Wook; Do, Jeong-Ryong; Cho, Seung-Mock; Lee, Yang-Bong; Kang, Suk-Nam; Park, Joung-Hyun						Simplified purification of chondroitin sulphate from scapular cartilage of shortfin mako shark (Isurus oxyrinchus)						INTERNATIONAL JOURNAL OF FOOD SCIENCE AND TECHNOLOGY			47	1			91	99		10.1111/j.1365-2621.2011.02811.x			2012-01-01	2012	Chondroitin sulphate (ChS) from the scapular cartilage of the shortfin mako shark (Isurus oxyrinchus) was purified by two-stage enzymatic hydrolysis and a fractional precipitation process using isopropyl alcohol. Characteristics of the ChS fraction were investigated using cellulose acetate membrane electrophoresis and FT-IR spectra. A maximum hydrolysis rate of 78.26% was achieved with 1.35% (w/w…						0			0	0950-5423		WOS:000298011500012
J	Wegner, Nicholas C.; Lai, N. Chin; Bull, Kristina B.; Graham, Jeffrey B.						Oxygen utilization and the branchial pressure gradient during ram ventilation of the shortfin mako, Isurus oxyrinchus: is lamnid shark-tuna convergence constrained by elasmobranch gill morphology?						JOURNAL OF EXPERIMENTAL BIOLOGY			215	1			22	28		10.1242/jeb.060095			2012-01-01	2012	Ram ventilation and gill function in a lamnid shark, the shortfin mako, Isurus oxyrinchus, were studied to assess how gill structure may affect the lamnid-tuna convergence for high-performance swimming. Despite differences in mako and tuna gill morphology, mouth gape and basal swimming speeds, measurements of mako O-2 utilization at the gills (53.4 +/- 4.2%) and the pressure gradient driving bran…						0			0	0022-0949		WOS:000298346700011
J	Speers-Roesch, Ben; Richards, Jeffrey G.; Brauner, Colin J.; Farrell, Anthony P.; Hickey, Anthony J. R.; Wang, Yuxiang S.; Renshaw, Gillian M. C.						Hypoxia tolerance in elasmobranchs. I. Critical oxygen tension as a measure of blood oxygen transport during hypoxia exposure						JOURNAL OF EXPERIMENTAL BIOLOGY			215	1			93	102		10.1242/jeb.059642			2012-01-01	2012	The critical O-2 tension of whole-animal O-2 consumption rate (M)over dot(O2)), or P-crit, is the water P-O2 (Pw(O2)) at which an animal transitions from an oxyregulator to an oxyconformer. Although P-crit is a popular measure of hypoxia tolerance in fishes because it reflects the capacity for O-2 uptake from the environment at low Pw(O2), little is known about the interrelationships between P-cr…						1			1	0022-0949		WOS:000298346700018
J	Speers-Roesch, Ben; Brauner, Colin J.; Farrell, Anthony P.; Hickey, Anthony J. R.; Renshaw, Gillian M. C.; Wang, Yuxiang S.; Richards, Jeffrey G.						Hypoxia tolerance in elasmobranchs. II. Cardiovascular function and tissue metabolic responses during progressive and relative hypoxia exposures						JOURNAL OF EXPERIMENTAL BIOLOGY			215	1			103	114		10.1242/jeb.059667			2012-01-01	2012	Cardiovascular function and metabolic responses of the heart and other tissues during hypoxia exposure were compared between the hypoxia-tolerant epaulette shark (Hemiscyllium ocellatum) and the hypoxia-sensitive shovelnose ray (Aptychotrema rostrata). In both species, progressive hypoxia exposure caused increases in stroke volume and decreases in heart rate, cardiac output, cardiac power output …						1			1	0022-0949		WOS:000298346700019
J	Tyne, Julian A.; Loneragan, Neil R.; Kopps, Anna M.; Allen, Simon J.; Kruetzen, Michael; Bejder, Lars						Ecological characteristics contribute to sponge distribution and tool use in bottlenose dolphins Tursiops sp.						MARINE ECOLOGY-PROGRESS SERIES			444				143	153		10.3354/meps09410			2012	2012	In Shark Bay, Western Australia, bottlenose dolphins Tursiops sp. carry conical sponges Echinodictyum mesenterinum on their rostra in the only documented cetacean foraging behaviour using a tool ('sponging'). In this study, we examined the influence of various ecological factors on live sponge distribution and the occurrence of sponging in parts of the western gulf of Shark Bay. We assessed spong…						0			0	0171-8630		WOS:000298970900011
J	Daly-Engel, Toby S; Seraphin, Kanesa D; Holland, Kim N; Coffey, John P; Nance, Holly A; Toonen, Robert J; Bowen, Brian W						Global phylogeography with mixed-marker analysis reveals male-mediated dispersal in the endangered scalloped hammerhead shark (Sphyrna lewini).						PloS one			7	1			e29986						2012	2012	BACKGROUND: The scalloped hammerhead shark, Sphyrna lewini, is a large endangered predator with a circumglobal distribution, observed in the open ocean but linked ontogenetically to coastal embayments for parturition and juvenile development. A previous survey of maternal (mtDNA) markers demonstrated strong genetic partitioning overall (global Phi(ST) = 0.749) and significant population separatio…						0			0	1932-6203		MEDLINE:22253848
J	Pichert, Annelie; Samsonov, Sergey A.; Theisgen, Stephan; Thomas, Lars; Baumann, Lars; Schiller, Juergen; Beck-Sickinger, Annette G.; Huster, Daniel; Pisabarro, M. Teresa						Characterization of the interaction of interleukin-8 with hyaluronan, chondroitin sulfate, dermatan sulfate and their sulfated derivatives by spectroscopy and molecular modeling						GLYCOBIOLOGY			22	1			134	145		10.1093/glycob/cwr120			2012-01-01	2012	The interactions between glycosaminoglycans (GAGs), important components of the extracellular matrix, and proteins such as growth factors and chemokines play critical roles in cellular regulation processes. Therefore, the design of GAG derivatives for the development of innovative materials with bio-like properties in terms of their interaction with regulatory proteins is of great interest for ti…						0			0	0959-6658		WOS:000297864400014
J	Zhao, Dan-Yang; Huang, Zhi-Ping; Wang, Min-Jie; Wang, Tao; Jin, Yifei						Vacuum casting replication of micro-riblets on shark skin for drag-reducing applications						JOURNAL OF MATERIALS PROCESSING TECHNOLOGY			212	1			198	202		10.1016/j.jmatprotec.2011.09.002			2012-01-01	2012	A vacuum casting method to replicate shark skin surface accurately in large area was investigated to overcome some difficulties in the replication process. The fresh shark skin was pretreated as a replication sample, and the replication mold of shark skin was manufactured by casting the unsaturated polyester resin under vacuum and laying the multilayer glass fibers. Under vacuum condition, silico…						0			0	0924-0136		WOS:000297893000026
J	Whitney, Nicholas M.; Pyle, Richard L.; Holland, Kim N.; Barcz, Jessica T.						Movements, reproductive seasonality, and fisheries interactions in the whitetip reef shark (Triaenodon obesus) from community-contributed photographs						ENVIRONMENTAL BIOLOGY OF FISHES			93	1			121	136		10.1007/s10641-011-9897-9			2012-01-01	2012	Despite being a common apex-level predator on coral reefs throughout the tropical Indo-Pacific, surprisingly little is known about whitetip reef shark (Triaenodon obesus) movements and biology. This study used photo-identification from community-contributed photographs to reveal patterns in movements, reproductive biology, and fisheries interactions in this species that have not been previously r…						2			2	0378-1909		WOS:000297728800012
J	Atta, Houssam M.; Radwan, Hassan G.						Biochemical studies on the production of Sparsomycin antibiotic by Pseudomonas aeurginosa, AZ-SH-B8 using plastic wastes as fermented substrate						JOURNAL OF SAUDI CHEMICAL SOCIETY			16	1			35	44		10.1016/j.jscs.2010.10.019			2012-01-01	2012	Hundred and twenty microbial isolates could be isolated from different soil samples collected from different localities in Egypt. One of the bacterial cultures AZ-SH-B8 was found to produce a wide spectrum antimicrobial agent when cultivated on plastic wastes. The bacterial culture AZ-SH-B8 could be isolated from a soil sample collected from Sharkia governorate, Egypt. From the taxonomic features…						0			0	1319-6103		WOS:000297863000006
J	Ramirez-Rodriguez, Mauricio; Angel Ojeda-Ruiz, Miguel						Spatial management of small-scale fisheries on the west coast of Baja California Sur, Mexico						MARINE POLICY			36	1			108	112		10.1016/j.marpol.2011.04.003			2012-01-01	2012	To understand small-scale fisheries in Mexico, the spatial and temporal distribution of the landed catch of several species was analyzed, including abalone, clams, snails, octopus, squids, lobsters, shrimps, blue crabs, sharks, rays and finfish along the 349 km of the Gulf of Ulloa coast. Data reported by fishers from 1998 to 2009 on catch volume and value per group of species and per fishing loc…						0			0	0308-597X		WOS:000296003300013
J	Fromager, Emmanuel						Rigorous formulation of two-parameter double-hybrid density-functionals			Part 2011			JOURNAL OF CHEMICAL PHYSICS			135	24					244106	10.1063/1.3671384			DEC 28 2011	2011	A two-parameter extension of the density-scaled double hybrid approach of Sharkas et al. [J. Chem. Phys. 134, 064113 (2011)] is presented. It is based on the explicit treatment of a fraction of multideterminantal exact exchange. The connection with conventional double hybrids is made when neglecting density scaling in the correlation functional as well as second-order corrections to the density. …						2			2	0021-9606		WOS:000298640500009
J	Fromager, Emmanuel						Rigorous formulation of two-parameter double-hybrid density-functionals.						The Journal of chemical physics			135	24			244106						2011-Dec-28	2011	A two-parameter extension of the density-scaled double hybrid approach of Sharkas et al. [J. Chem. Phys. 134, 064113 (2011)] is presented. It is based on the explicit treatment of a fraction of multideterminantal exact exchange. The connection with conventional double hybrids is made when neglecting density scaling in the correlation functional as well as second-order corrections to the density. …						0			0	1089-7690		MEDLINE:22225143
J	Heise, Edward I.; Carrier, Jeffrey C.; Pratt, Harold L., Jr.; Pratt, Theo C.						Exact Enumeration of Sires in the Polyandrous Nurse Shark (Ginglymostoma cirratum)						COPEIA				4			539	544		10.1643/CE-10-165			DEC 27 2011	2011	Polyandry has been demonstrated in a number of shark species. Studies based on a small number of loci typically estimate the minimum number of sires, which may be much lower than the actual number of sires due to the sharing of alleles by parents. We genotyped three litters of Nurse Shark (Ginglymostoma cirratum) ranging in size from 29 to 39 pups at 12 DNA microsatellite loci to determine the nu…						1			1	0045-8511		WOS:000298829600008
J	Schneider, Kenneth; Silverman, Jacob; Woolsey, Erika; Eriksson, Hampus; Byrne, Maria; Caldeira, Ken						Potential influence of sea cucumbers on coral reef CaCO3 budget: A case study at One Tree Reef						JOURNAL OF GEOPHYSICAL RESEARCH-BIOGEOSCIENCES			116						G04032	10.1029/2011JG001755			DEC 23 2011	2011	To endure, coral reefs must accumulate CaCO3 at a rate greater or equal than the sum of mechanically, biologically, and chemically mediated erosion rates. We investigated the potential role of holothurians on the CaCO3 balance of a coral reef. These deposit feeders process carbonate sand and rubble through their digestive tract and dissolve CaCO3 as part of their digestive process. In aquarium in…						1			1	0148-0227		WOS:000298497900001
J	Flammang, Brooke E.; Lauder, George V.; Troolin, Daniel R.; Strand, Tyson						Volumetric imaging of shark tail hydrodynamics reveals a three-dimensional dual-ring vortex wake structure						PROCEEDINGS OF THE ROYAL SOCIETY B-BIOLOGICAL SCIENCES			278	1725			3670	3678		10.1098/rspb.2011.0489			DEC 22 2011	2011	Understanding how moving organisms generate locomotor forces is fundamental to the analysis of aerodynamic and hydrodynamic flow patterns that are generated during body and appendage oscillation. In the past, this has been accomplished using two-dimensional planar techniques that require reconstruction of three-dimensional flow patterns. We have applied a new, fully three-dimensional, volumetric …						1			1	0962-8452		WOS:000296874600007
J	King, Benjamin L.; Gillis, J. Andrew; Carlisle, Heather R.; Dahn, Randall D.						A Natural Deletion of the HoxC Cluster in Elasmobranch Fishes						SCIENCE			334	6062			1517	1517		10.1126/science.1210912			DEC 16 2011	2011							1			1	0036-8075		WOS:000298091400043
J	Lane, David P.; Madhumalar, Arumugam; Lee, Alison P.; Tay, Boon-Hui; Verma, Chandra; Brenner, Sydney; Venkatesh, Byrappa						Conservation of all three p53 family members and Mdm2 and Mdm4 in the cartilaginous fish						CELL CYCLE			10	24			4272	4279		10.4161/cc.10.24.18567			DEC 15 2011	2011	Analysis of the genome of the elephant shark (Callorhinchus milii), a member of the cartilaginous fishes (Class Chondrichthyes), reveals that it encodes all three members of the p53 gene family, p53, p63 and p73, each with clear homology to the equivalent gene in bony vertebrates (Class Osteichthyes). Thus, the gene duplication events that lead to the presence of three family members in the verte…						0			0	1538-4101		WOS:000298407200028
J	Thomson, Jordan A.; Heithaus, Michael R.; Dill, Lawrence M.						Informing the interpretation of dive profiles using animal-borne video: A marine turtle case study						JOURNAL OF EXPERIMENTAL MARINE BIOLOGY AND ECOLOGY			410				12	20		10.1016/j.jembe.2011.10.002			DEC 15 2011	2011	It is often of interest to infer the behavior of air-breathing aquatic taxa (i.e., divers) based on the characteristics of dive profiles, which are relatively affordable and easy to obtain. However, dives that appear similar in shape or other attributes can reflect multiple activities, confounding their interpretation. Here, we used animal-borne video and environmental data recorders (AVED) to ex…						0			0	0022-0981		WOS:000298535600002
J	Couradeau, Estelle; Benzerara, Karim; Moreira, David; Gerard, Emmanuelle; Kazmierczak, Jozef; Tavera, Rosaluz; Lopez-Garcia, Purificacion						Prokaryotic and Eukaryotic Community Structure in Field and Cultured Microbialites from the Alkaline Lake Alchichica (Mexico)						PLOS ONE			6	12					e28767	10.1371/journal.pone.0028767			DEC 14 2011	2011	The geomicrobiology of crater lake microbialites remains largely unknown despite their evolutionary interest due to their resemblance to some Archaean analogs in the dominance of in situ carbonate precipitation over accretion. Here, we studied the diversity of archaea, bacteria and protists in microbialites of the alkaline Lake Alchichica from both field samples collected along a depth gradient (…						1			1	1932-6203		WOS:000298369100095
J	Daniel Anadon, Jose; D'Agrosa, Caterina; Gondor, Anne; Gerber, Leah R.						Quantifying the Spatial Ecology of Wide-Ranging Marine Species in the Gulf of California: Implications for Marine Conservation Planning						PLOS ONE			6	12					e28400	10.1371/journal.pone.0028400			DEC 6 2011	2011	There is growing interest in systematic establishment of marine protected area (MPA) networks and representative conservation sites. This movement toward networks of no-take zones requires that reserves are deliberately and adequately spaced for connectivity. Here, we test the network functionality of an ecoregional assessment configuration of marine conservation areas by evaluating the habitat p…						0			0	1932-6203		WOS:000298173500017
J	Gilligan, J. J.; Otway, N. M.						Comparison of dorsal and pectoral fin denudes for grey nurse, great white, and six whaler sharks from east Australian waters						Journal and Proceedings of the Royal Society of New South Wales			144	Part 3-4			66	82					2011-12-01	2011	Escalating demand for shark fins poses a major threat to shark populations world-wide and the monitoring of shark catches can be very difficult when only the fins are present. Identifying a species of shark. using only its fins can be enhanced by using the dermal denticles as they maintain their structural integrity irrespective of freezing or drying. In this study, scanning electron microscopy w…						0			0	0035-9173		BCI:BCI201200339458
J	Arreguin-Sanchez, Francisco						Ecosystem dynamics under "top-down" and "bottom-up" control situations generated by intensive harvesting rates						HIDROBIOLOGICA			21	3			323	332					2011-12-01	2011	Top-down and "bottom-up" control processes in exploited ecosystems have been characterised using their impacts on the mean trophic level of catches, changes in biomass, and certain ecosystem attributes. Most scientific contributions have been based on case studies of particular ecosystems. So, the aim of this study is to identify and understand ecosystem processes governing their response to fish…						0			0	0188-8897		WOS:000301997300010
J	Zou, Jun; Secombes, Christopher J.						Teleost fish interferons and their role in immunity						DEVELOPMENTAL AND COMPARATIVE IMMUNOLOGY			35	12	SI		1376	1387		10.1016/j.dci.2011.07.001			2011-12-01	2011	Interferons (IFNs) are the hallmark of the vertebrate antiviral system. Two of the three IFN families identified in higher vertebrates are now known to be important for antiviral defence in teleost fish. Based on the cysteine patterns, the fish type I IFN family can be divided into two subfamilies, which possibly interact with distinct receptors for signalling. The fish type II IFN family consist…						0			0	0145-305X		WOS:000300540300020
J	Makarov, I. A.						Numerical Modeling of Viscoelastic Counter Flows Using the Pressure Correction Method						FLUID DYNAMICS			46	6			868	877		10.1134/S0015462811060044			2011-12-01	2011	Counter flows of a viscoelastic fluid described by the rheological Oldroyd model in cross-shaped channels are investigated. The modeling is based on the pressure correction method in a convenient-in-use form and with a simple topology of the computation grid and formally proved convergence. It is shown that, starting from certain threshold values of the Weissenberg numbers, the flow pattern in th…						0			0	0015-4628		WOS:000300094200001
J	Mendonca, Fernando F.; Oliveira, Claudio; Gadig, Otto B. F.; Foresti, Fausto						Phylogeography and genetic population structure of Caribbean sharpnose shark Rhizoprionodon porosus						REVIEWS IN FISH BIOLOGY AND FISHERIES			21	4			799	814		10.1007/s11160-011-9210-1			2011-12-01	2011	Sharks of the genus Rhizoprionodon are among the most important predators along the coastal marine ecosystems, and they represent an important economic resource for the small-scale fisheries. To properly manage and conserve exploited shark species, detailed analyses of their population structure are needed. To evaluate the gene flow and levels of the genetic diversity among populations of the Car…						0			0	0960-3166		WOS:000300107600011
J	Valls, Maria; Quetglas, Antoni; Ordines, Francesc; Moranta, Joan						Feeding ecology of demersal elasmobranchs from the shelf and slope off the Balearic Sea (western Mediterranean)						SCIENTIA MARINA			75	4			633	639		10.3989/scimar.2011.75n4633			2011-12-01	2011	The feeding ecology of eight demersal elasmobranchs, three sharks (Etmopterus spinax, Scyliorhinus canicula and Galeus melastomus) and five batoids (Myliobatis aquila, Leucoraja naevus, Raja polystigma, R. miraletus and R. clavata), from the Balearic Sea (western Mediterranean) was analyzed. For each species, the diet and feeding habits were characterized by depth strata using quantitative indice…						2			2	0214-8358		WOS:000299491700002
J	Gouraguine, Adam; Hidalgo, Manuel; Moranta, Joan; Bailey, David M.; Ordines, Francesc; Guijarro, Beatriz; Valls, Maria; Barbera, Carmen; De Mesa, Aina						Elasmobranch spatial segregation in the western Mediterranean						SCIENTIA MARINA			75	4			653	664		10.3989/scimar.2011.75n4653			2011-12-01	2011	Basic information on the distribution and habitat preferences of ecologically important species is essential for their management and protection. This study focuses on the depth related trends and the geographic patterns that shape the community of the elasmobranch species in the Balearic Islands (Mediterranean Sea) using data collected from 2001 to 2009. Non-metric Multi-Dimensional Scaling (MDS…						1			1	0214-8358		WOS:000299491700004
J	Zammit, Maria; Kear, Benjamin P.						Healed bite marks on a Cretaceous ichthyosaur						ACTA PALAEONTOLOGICA POLONICA			56	4			859	863		10.4202/app.2010.0117			2011-12-01	2011	Reports of pathological ichthyosaur fossils are very rare. The identification of a series of healed cuts and an associated gouge on the lower jaw of an adult (ca. 5 metres body length) Platypterygius specimen from the Lower Cretaceous of Australia is therefore significant, because it constitutes direct evidence of bite force trauma sustained during the life of the animal. Based on the close spaci…						1			1	0567-7920		WOS:000299303900015
J	Hussey, Nigel E.; Dudley, Sheldon F. J.; McCarthy, Ian D.; Cliff, Geremy; Fisk, Aaron T.						Stable isotope profiles of large marine predators: viable indicators of trophic position, diet, and movement in sharks?						CANADIAN JOURNAL OF FISHERIES AND AQUATIC SCIENCES			68	12			2029	2045		10.1139/F2011-115			2011-12-01	2011	Understanding the role of predators is challenging but critical for ecosystem management. For community dynamics, predator-specific size-based variation in diet, trophic position, and habitat use are rarely accounted for. Using two applied tools (stable isotopes and stomach content data), we examined inter- and intra-species ontogenetic variability in diet (stomach contents), trophic position (TP…						1			1	0706-652X		WOS:000299190600001
J	Cooke, Steven J.; Iverson, Sara J.; Stokesbury, Michael J. W.; Hinch, Scott G.; Fisk, Aaron T.; VanderZwaag, David L.; Apostle, Richard; Whoriskey, Fred						Ocean Tracking Network Canada: A Network Approach to Addressing Critical Issues in Fisheries and Resource Management with Implications for Ocean Governance						FISHERIES			36	12			583	592					2011-12-01	2011	The Ocean Tracking Network (OTN) Canada is an integrative seven-year research program initiated in 2010 with academic, government, and industry partners. The team makes use of novel biotelemetry (primarily acoustic telemetry curtains), biologging, and oceanographic technologies to better understand changing ocean dynamics and their impact on ocean ecosystems, animal movements, and ecology and the…						0			0	0363-2415		WOS:000299507000002
J	Troynikov, V. S.; Gorfine, H. K.; Lozys, L.; Putys, Z.; Jakubaviciute, E.; Day, R. W.						Parameterization of European perch Perca fluviatilis length-at-age data using stochastic Gompertz growth models						JOURNAL OF FISH BIOLOGY			79	7			1940	1949		10.1111/j.1095-8649.2011.03135.x			2011-12-01	2011	Three stochastic versions of the Gompertz growth model were used to parameterize total length (LT)-at-age data for perch Perca fluviatilis, an important target species for commercial and recreational fishers and a food species for predatory fishes and aquatic birds. Each model addresses growth heterogeneity by incorporating random parameters from a specific positive distribution: Weibull, gamma o…						0			0	0022-1112		WOS:000298014800016
J	Luiz, Osmar J.; Edwards, Alasdair J.						Extinction of a shark population in the Archipelago of Saint Paul's Rocks (equatorial Atlantic) inferred from the historical record						BIOLOGICAL CONSERVATION			144	12			2873	2881		10.1016/j.biocon.2011.08.004			2011-12-01	2011	Detecting and determining the validity of local extinctions is an important conservation measure in order to uncover management failures. There are quantitative and qualitative methods that estimate extinction probability based on past sighting records. However, because current baselines about species' abundances and distributions in the sea were mostly established after humans had started affect…						0			0	3207-06-01		WOS:000298521500017
J	Taylor, Richard B.; Morrison, Mark A.; Shears, Nick T.						Establishing baselines for recovery in a marine reserve (Poor Knights Islands, New Zealand) using local ecological knowledge						BIOLOGICAL CONSERVATION			144	12			3038	3046		10.1016/j.biocon.2011.09.009			2011-12-01	2011	Local ecological knowledge is a potentially valuable, but mostly untapped, resource for evaluating decadal-scale shifts in abundances of organisms. In this study, recollections of long-term divers were quantified to assess changes in underwater life at the Poor Knights Islands in temperate northeastern New Zealand from the 1960s to 2000s, in order to establish baselines for recovery since the isl…						1			1	3207-06-01		WOS:000298521500035
J	Sims, D. W.; Humphries, N. E.; McHugh, M.; Wearmouth, V. J.						ELECTRONIC TAGGING OF CUTTLEFISH Sepia officinalis AND OCTOPUS Eledone cirrhosa TO STUDY COMMONALITIES IN BEHAVIOUR PATTERNS AND COMPARISONS WITH MARINE FISH						JOURNAL OF SHELLFISH RESEARCH			30	3			1020	1021					2011-12-01	2011							0			0	0730-8000		WOS:000299138700104
J	Pethybridge, Heidi; Daley, Ross; Virtue, Patti; Nichols, Peter D.						Lipid (energy) reserves, utilisation and provisioning during oocyte maturation and early embryonic development of deepwater chondrichthyans						MARINE BIOLOGY			158	12			2741	2754		10.1007/s00227-011-1773-9			2011-12-01	2011	We studied the lipid dynamics (lipid contents, classes and fatty acids) during oogenesis and early embryogenesis of 7 viviparous and 3 oviparous deepwater chondrichthyans. Mature pre-ovulated ovarian follicles of all species were high in lipid content, indicative of large energetic expenditure and high maternal investment. Larger lipid reserves were found in viviparous dogshark (28-36% wet weight…						0			0	0025-3162		WOS:000299182500012
J	Mara Garcia, Edith Xio; Balbino, Ausenda; Antunes, Miguel; Ruiz, Francisco; Civis, Jorge; Abad, Manuel; Toscano-Grande, Antonio						The Carcharhiniform sharks (Chondrichthyes, Galeomorphii) from the lower Pliocene of the Arenas de Huelva Formation, southeastern Guadalquivir basin, Spain						REVISTA MEXICANA DE CIENCIAS GEOLOGICAS			28	3			474	492					2011-12-01	2011	Carcharhiniform shark teeth from eight localities of the lower Pliocene Arenas de Huelva Formation were studied in the southwestern part of the Guadalquivir basin. Thirty-five samples were collected. Three hundred kilograms of sediments were levigated and 48 teeth were found. The genera Megascyliorhinus, Premontreia, Mustelus, Paragaleus, Carcharhinus and Galeocerdo were recognized. Carcharhinus …						0			0	1026-8774		WOS:000298074300011
J	Sullivan, Timothy; Regan, Fiona						The characterization, replication and testing of dermal denticles of Scyliorhinus canicula for physical mechanisms of biofouling prevention						BIOINSPIRATION & BIOMIMETICS			6	4					46001	10.1088/1748-3182/6/4/046001			2011-12-01	2011	There is a current need to develop novel non-toxic antifouling materials. The mechanisms utilized by marine organisms to prevent fouling of external surfaces are of interest in this regard. Biomimicry of these mechanisms and the ability to transfer the antifouling characteristics of these surfaces to artificial surfaces are a highly attractive prospect to those developing antifouling technologies…						0			0	1748-3182		WOS:000298139700008
J	Escobar-Sanchez, Ofelia; Galvan-Magana, Felipe; Rosiles-Martinez, Rene						Biomagnification of Mercury and Selenium in Blue Shark Prionace glauca from the Pacific Ocean off Mexico						BIOLOGICAL TRACE ELEMENT RESEARCH			144	2012-01-03			550	559		10.1007/s12011-011-9040-y			2011-12-01	2011	The aim of this study was to determine the biomagnification of mercury through the principal prey of the blue shark, Prionace glauca, off the western coast of Baja California Sur, Mexico, as well as the relationship between mercury and selenium in blue sharks. High levels of mercury were found in shark muscle tissues (1.39 +/- 1.58 mu g/g wet weight); these values are above the allowed 1.0 mu g/g…						0			0	0163-4984		WOS:000298192900054
J	Whiting, Scott D.; Whiting, Andrea U.						Predation by the Saltwater Crocodile (Crocodylus porosus) on Sea Turtle Adults, Eggs, and Hatchlings						CHELONIAN CONSERVATION AND BIOLOGY			10	2			198	205					2011-12-01	2011	This paper describes predation tactics used by the saltwater crocodile (Crocodylus porosus) on flatback (Natator depressus) and olive ridley (Lepidochelys olivacea) sea turtles on nesting beaches in northern Australia. For adult turtles, crocodiles used both a sit-and-wait tactic in which they attacked a turtle at the water's edge after it completed nesting and an active hunting strategy in which…						0			0	1071-8443		WOS:000299019400007
J	Sreedharan, Smitha; Almen, Markus S.; Carlini, Valeria P.; Haitina, Tatjana; Stephansson, Olga; Sommer, Wolfgang H.; Heilig, Markus; de Barioglio, Susana R.; Fredriksson, Robert; Schioth, Helgi B.						The G protein coupled receptor Gpr153 shares common evolutionary origin with Gpr162 and is highly expressed in central regions including the thalamus, cerebellum and the arcuate nucleus						FEBS JOURNAL			278	24			4881	4894		10.1111/j.1742-4658.2011.08388.x			2011-12-01	2011	The Rhodopsin family of G protein coupled receptors (GPCRs) includes the phylogenetic a-group consisting of about 100 human members. The a-group is the only group of GPCRs that has many receptors for biogenic amines which are major drug targets. Several members of this group are orphan receptors and their functions are elusive. In this study we present a detailed phylogenetic and anatomical chara…						0			0	1742-464X		WOS:000297737500015
J	Ren, Wenhua; Pang, Shuying; You, Fengtao; Zhou, Lidan; Zhang, Shuangquan						The first BAFF gene cloned from the cartilaginous fish						FISH & SHELLFISH IMMUNOLOGY			31	6			1088	1096		10.1016/j.fsi.2011.09.013			2011-12-01	2011	B-cell activating factor (BAFF), a member of the TNF family, is critical to the survival, proliferation, maturation, and differentiation of B-cells. In the present study, a CpBAFF was amplified from the white-spotted catshark (Chiloscyllium plagiosum) using RT-PCR and RACE (rapid amplification of cDNA end) techniques. To our knowledge, this is the first report of any BAFF gene being cloned from a…						0			0	1050-4648		WOS:000298569700046
J	Ormseth, Olav A.; Spencer, Paul D.						An assessment of vulnerability in Alaska groundfish						FISHERIES RESEARCH			112	3	SI		127	133		10.1016/j.fishres.2011.02.010			2011-12-01	2011	Federal fishery management rules in the United States have recently changed, necessitating an examination of which fish stocks require annual catch limits and how appropriate stock complexes are formed. We used an analytical approach termed productivity-susceptibility analysis (PSA) to analyze the vulnerability of federally managed Alaska groundfish stocks to overfishing. The focus of the effort …						1			1	0165-7836		WOS:000298778200004
J	Zhou, Shijie; Smith, Anthony D. M.; Fuller, Mike						Quantitative ecological risk assessment for fishing effects on diverse data-poor non-target species in a multi-sector and multi-gear fishery						FISHERIES RESEARCH			112	3	SI		168	178		10.1016/j.fishres.2010.09.028			2011-12-01	2011	Assessment of ecological sustainability for all species impacted by fishing is one of the most important and practical steps towards an Ecosystem Approach to Fisheries. We extend methods for Sustainability Assessment for Fishing Effects (SAFE) to assess diverse bycatch species in a multi-sector and multi-gear fishery. We develop methods for estimating fishing mortality rate, based on limited data…						1			1	0165-7836		WOS:000298778200008
J	Khan, M. Ali; Piazza, Adriana						Optimal cyclicity and chaos in the 2-sector RSS model: An anything-goes construction						JOURNAL OF ECONOMIC BEHAVIOR & ORGANIZATION			80	3			397	417		10.1016/j.jebo.2011.04.004			2011-12-01	2011	We present a simple and transparent construction that furnishes, for any pre-chosen dynamic, particular instances of the 2-sector version of the Robinson-Solow-Srinivasan model that yield the chosen dynamic, including optimal topologically chaotic programs and those that exhibit cycles of any given period. The construction is expressed in terms of the marginal rate of transformation of capital fr…						0			0	0167-2681		WOS:000298463300002
J	Enzor, L. A.; Wilborn, R. E.; Bennett, W. A.						Toxicity and metabolic costs of the Atlantic stingray (Dasyatis sabina) venom delivery system in relation to its role in life history						JOURNAL OF EXPERIMENTAL MARINE BIOLOGY AND ECOLOGY			409	2012-01-02			235	239		10.1016/j.jembe.2011.08.026			DEC 1 2011	2011	The Atlantic stingray (Dasyatis sabina) venomous spine is thought to be primarily a defensive adaptation, but may also play key roles in reproduction and conspecific social interactions. This study quantified metabolic costs associated with the venom delivery system, venom toxicity (LC(50)), and routine resting metabolism for Atlantic stingrays. Respirometry trials estimated an average routine re…						0			0	0022-0981		WOS:000298363100030
J	Pethybridge, Heidi; Daley, Ross K.; Nichols, Peter D.						Diet of demersal sharks and chimaeras inferred by fatty acid profiles and stomach content analysis						JOURNAL OF EXPERIMENTAL MARINE BIOLOGY AND ECOLOGY			409	2012-01-02			290	299		10.1016/j.jembe.2011.09.009			DEC 1 2011	2011	Obtaining adequate dietary information for many shark and chimaera species has long been a challenge for ecosystem managers, largely due to logistical difficulties in the collection of large sample sizes required for stomach content analyses. Here, we use multivariate analysis of signature fatty acid (FA) profiles as a complementary method to examine the diet composition of 16 demersal shark and …						1			1	0022-0981		WOS:000298363100038
J	Jordan, Laura K.; Mandelman, John W.; Kajiura, Stephen M.						Behavioral responses to weak electric fields and a lanthanide metal in two shark species						JOURNAL OF EXPERIMENTAL MARINE BIOLOGY AND ECOLOGY			409	2012-01-02			345	350		10.1016/j.jembe.2011.09.016			DEC 1 2011	2011	The unintentional catch of sharks on hooks intended for other fishes is an economic, environmental and safety concern. Recent research has sought to repel sharks from baited hooks by applying various lanthanide metals and alloys to stimulate the elasmobranch electrosensory system. We present a simplified experimental methodology to test responses of two shark species to a single lanthanide metal.…						0			0	0022-0981		WOS:000298363100045
J	Brooks, Edward J.; Sloman, Katherine A.; Liss, Stephanie; Hassan-Hassanein, Laila; Danylchuk, Andy J.; Cooke, Steven J.; Mandelman, John W.; Skomal, Gregory B.; Sims, David W.; Suski, Cory D.						The stress physiology of extended duration tonic immobility in the juvenile lemon shark, Negaprion brevirostris (Poey 1868)						JOURNAL OF EXPERIMENTAL MARINE BIOLOGY AND ECOLOGY			409	2012-01-02			351	360		10.1016/j.jembe.2011.09.017			DEC 1 2011	2011	Tonic immobility (TI) is a reversible coma-like stasis inherent to a variety of terrestrial and aquatic taxa, including elasmobranchs, yet virtually nothing is known about its underlying neurological and physiological processes in any taxa. The purpose of this research was to investigate the physiological effects of TI on the juvenile lemon shark (Negaprion brevirostris). Eight juvenile lemon sha…						0			0	0022-0981		WOS:000298363100046
J	Marancik, David P.; Berliner, Aimee L.; Cavin, Julie M.; Clauss, Tonya M.; Dove, Alistair D. M.; Sutton, Deanna A.; Wickes, Brian L.; Camus, Alvin C.						DISSEMINATED FUNGAL INFECTION IN TWO SPECIES OF CAPTIVE SHARKS						JOURNAL OF ZOO AND WILDLIFE MEDICINE			42	4			686	693					2011-12-01	2011	In this report, two cases of systemic mycosis in captive sharks are characterized. These cases were progressive and ultimately culminated in terminal disease. Paecilomyces lilacinus, an uncommon pathogen in human and veterinary medicine, was associated with areas of necrosis in the liver, heart, and gill in a great hammerhead shark (Sphyrna mokarran). Fungal growth was observed from samples of ki…						0			0	1042-7260		WOS:000298440000019
J	King, Tanya J.						The "Skipper Effect": Riddles of Luck and Rhetorics of Individualism						HUMAN ORGANIZATION			70	4			387	396					WIN 2011	2011	The unresolved "skipper effect" debate of the 1980s and 1990s in maritime anthropology hinged upon a dispute over whether the learned skills and innate attributes of a commercial skipper influenced fishing success, measured in landed catch amounts, or whether success could be largely accounted for by boat size and other variables. In this paper, I argue that the questions raised in the debate wou…						0			0	0018-7259		WOS:000297862500006
J	Capape, C.; Reynaud, C.						Maturity, reproductive cycle and fecundity of the spiny dogfish Squalus acanthias (Chondrichthyes: Squalidae) off the Languedocian coast (southern France, northern Mediterranean)						JOURNAL OF THE MARINE BIOLOGICAL ASSOCIATION OF THE UNITED KINGDOM			91	8			1627	1635		10.1017/S0025315411000270			2011-12-01	2011	The spiny dogfish Squalus acanthias is widely distributed in Atlanto-Mediterranean regions, being captured off the Languedocian coast (southern France, northern Mediterranean), despite a decline of landings. The male and female sexually matured between 635 - 700 mm and 860-880 mm total length (TL), respectively. The largest male and female were 800 mm and 1110 mm TL, respectively and weighed 2220…						0			0	0025-3154		WOS:000297881700007
J	Ferreira, R. L.; Martins, H. R.; Bolten, A. B.; Santos, M. A.; Erzini, K.						Influence of environmental and fishery parameters on loggerhead sea turtle by-catch in the longline fishery in the Azores archipelago and implications for conservation						JOURNAL OF THE MARINE BIOLOGICAL ASSOCIATION OF THE UNITED KINGDOM			91	8			1697	1705		10.1017/S0025315410000846			2011-12-01	2011	Oceanic juvenile loggerhead sea turtles, Caretta caretta, foraging in Azorean waters, are incidentally caught in drifting longlines that target swordfish, Xiphias gladius, and blue shark, Prionace glauca. Data were recorded during a longline gear modification experiment conducted in 2000. The results show that the captures are not uniformly distributed in relation to fishing effort, with 81% of t…						1			1	0025-3154		WOS:000297881700015
J	Booth, Warren; Schuett, Gordon W.						Molecular genetic evidence for alternative reproductive strategies in North American pitvipers (Serpentes: Viperidae): long-term sperm storage and facultative parthenogenesis						BIOLOGICAL JOURNAL OF THE LINNEAN SOCIETY			104	4			934	942		10.1111/j.1095-8312.2011.01782.x			2011-12-01	2011	The first documentation of facultative parthenogenesis (FP) in non-avian reptiles (snakes) occurred in 1997, following the application of molecular genetic methods for parentage analysis, and since has been described in only four additional snake species. Here, in two species of live-bearing (viviparous) North American pitviper snakes, using microsatellite DNA fingerprinting, we describe the firs…						0			0	0024-4066		WOS:000297469100016
J	Alfaro-Shigueto, Joanna; Mangel, Jeffrey C.; Bernedo, Francisco; Dutton, Peter H.; Seminoff, Jeffrey A.; Godley, Brendan J.						Small-scale fisheries of Peru: a major sink for marine turtles in the Pacific						JOURNAL OF APPLIED ECOLOGY			48	6			1432	1440		10.1111/j.1365-2664.2011.02040.x			2011-12-01	2011	1. Over the last few decades, evidence of marine vertebrate bycatch has been collected for a range of industrial fisheries. It has recently been acknowledged that large impacts may also result from similar interactions with small-scale fisheries (SSF) due largely to their diffuse effort and large number of vessels in operation. Marine mammals, seabirds, turtles as well as some shark species have …						5			5	0021-8901		WOS:000297416300013
J	Knight, Kathryn						PREGNANCY IS A DRAG FOR BOTTLENOSE DOLPHINS						JOURNAL OF EXPERIMENTAL BIOLOGY			214	24			I	I		10.1242/jeb.068056			2011-12-01	2011							0			0	0022-0949		WOS:000297684200001
J	Van-Eyk, Sarah M.; Siebeck, Ulrike E.; Champ, Connor M.; Marshall, Justin; Hart, Nathan S.						Behavioural evidence for colour vision in an elasmobranch						JOURNAL OF EXPERIMENTAL BIOLOGY			214	24			4186	4192		10.1242/jeb.061853			2011-12-01	2011	Little is known about the sensory abilities of elasmobranchs (sharks, skates and rays) compared with other fishes. Despite their role as apex predators in most marine and some freshwater habitats, interspecific variations in visual function are especially poorly studied. Of particular interest is whether they possess colour vision and, if so, the role(s) that colour may play in elasmobranch visua…						2			2	0022-0949		WOS:000297684200018
J	Lloyd, R.; Lloyd, C.						Surgical removal of a gastric foreign body in a sand tiger shark, Carcharias taurus Rafinesque						JOURNAL OF FISH DISEASES			34	12			951	953		10.1111/j.1365-2761.2011.01313.x			2011-12-01	2011							0			0	0140-7775		WOS:000297505800010
J	Eriksson, Mats E.; Lindgren, Johan; Chin, Karen; Mansby, Urban						Coprolite morphotypes from the Upper Cretaceous of Sweden: novel views on an ancient ecosystem and implications for coprolite taphonomy						LETHAIA			44	4			455	468		10.1111/j.1502-3931.2010.00257.x			2011-12-01	2011	Coprolites (fossilized faeces) are common, yet previously unreported, elements in the Campanian (Upper Cretaceous) shallow-marine strata of Asen, southern Sweden. They are associated with a diverse vertebrate fauna and comprise at least seven different morphotypes that suggest a variety of source animals. Their faecal origin is corroborated by several lines of evidence, including chemical composi…						0			0	0024-1164		WOS:000297553800010
J	Kriwet, Juergen; Klug, Stefanie						A new Jurassic cow shark (Chondrichthyes, Hexanchiformes) with comments on Jurassic hexanchiform systematics						SWISS JOURNAL OF GEOSCIENCES			104				S107	S114		10.1007/s00015-011-0075-z		1	2011-12-01	2011	A new taxon, aEuro Crassodontidanus gen. nov. of Hexanchiformes (cow sharks) from the Jurassic of Germany is described. It is characterized by peculiar teeth combining apomorphic (serrated mesial cutting edge of the main cusp) and plesiomorphic features (deep root with convex mesial and distal margins in labial and lingual views; protruding lingual root bulge). This character combination readily …						0			0	1661-8726		WOS:000297839800009
J	Mueller, Moyna K.						The fish fauna of the Late Jurassic Solothurn Turtle Limestone (NW Switzerland)						SWISS JOURNAL OF GEOSCIENCES			104				S133	S146		10.1007/s00015-011-0061-5		1	2011-12-01	2011	The surroundings of Solothurn (NW Switzerland) have been known for their fossil marine turtles since the beginning of the nineteenth century. In more recent history, access to the fossil bearing layers i.e. the Ratschenbank (Kimmeridgian, Late Jurassic) has not been possible until 1986 when one of the old quarries in the area re-opened. A series of excavations from 1986 to 1989 provided new mater…						0			0	1661-8726		WOS:000297839800011
J	Porter, Marianne E.; Roque, Cassandra M.; Long, John H., Jr.						Swimming fundamentals: turning performance of leopard sharks (Triakis semifasciata) is predicted by body shape and postural reconfiguration						ZOOLOGY			114	6			348	359		10.1016/j.zool.2011.06.001			2011-12-01	2011	Turns are essential maneuvers that sharks employ when foraging, feeding, and migrating. How well any individual performs in turning is determined, in part, by the static form and postural reconfiguration of its body. Since the importance of postural reconfiguration in determining turning performance is not well understood, our goal was to examine how body form and posture correlate with turning p…						0			0	0944-2006		WOS:000297909600005
J	Borrell, Asuncion; Aguilar, Alex; Gazo, Manel; Kumarran, R. P.; Cardona, Luis						Stable isotope profiles in whale shark (Rhincodon typus) suggest segregation and dissimilarities in the diet depending on sex and size						ENVIRONMENTAL BIOLOGY OF FISHES			92	4			559	567		10.1007/s10641-011-9879-y			2011-12-01	2011	We investigated the sex- and size-related differences in the diet of whale sharks from the Arabian Sea (north-western Indian Ocean) using carbon and nitrogen stable-isotope analyses in white muscle. The samples were collected during the commercial fishing season between April and May of 2001 in Veraval (Gujarat, India). The overall isotope signature was similar to that of the pelagic-neritic zoop…						1			1	0378-1909		WOS:000296644300013
J	Di Santo, Valentina; Bennett, Wayne A.						Effect of rapid temperature change on resting routine metabolic rates of two benthic elasmobranchs						FISH PHYSIOLOGY AND BIOCHEMISTRY			37	4			929	934		10.1007/s10695-011-9490-3			2011-12-01	2011	In this study, flow-through respirometry was used to test the effect of acute temperature change on resting routine metabolic rates of two benthic elasmobranchs, Atlantic stingrays, Dasyatis sabina (n = 7) and whitespotted bamboo sharks, Chiloscyllium plagiosum (n = 7) kept under fluctuating temperature regime of 24-27 and 23-25A degrees C, respectively. Atlantic stingrays and whitespotted bamboo…						0			0	0920-1742		WOS:000296646800020
J	Sullivan, Timothy; Regan, Fiona						The characterization, replication and testing of dermal denticles of Scyliorhinus canicula for physical mechanisms of biofouling prevention.						Bioinspiration & biomimetics			6	4			46001						2011-Dec	2011	There is a current need to develop novel non-toxic antifouling materials. The mechanisms utilized by marine organisms to prevent fouling of external surfaces are of interest in this regard. Biomimicry of these mechanisms and the ability to transfer the antifouling characteristics of these surfaces to artificial surfaces are a highly attractive prospect to those developing antifouling technologies…						0			0	1748-3190		MEDLINE:21992932
J	Polakof, Sergio; Mommsen, Thomas P.; Soengas, Jose L.						Glucosensing and glucose homeostasis: From fish to mammals						COMPARATIVE BIOCHEMISTRY AND PHYSIOLOGY B-BIOCHEMISTRY & MOLECULAR BIOLOGY			160	4			123	149		10.1016/j.cbpb.2011.07.006			2011-12-01	2011	This review is focused on two topics related to glucose in vertebrates. In a first section devoted to glucose homeostasis we describe how glucose levels fluctuate and are regulated in different classes of vertebrates. The detection of these fluctuations is essential for homeostasis and for other physiological processes such as regulation of food intake. The capacity of that detection is known as …						3			3	1096-4959		WOS:000296679800001
J	Newman, Kim						Shark Night						SIGHT AND SOUND			21	12			73	73					2011-12-01	2011							0			0	0037-4806		WOS:000297087500048
J	Balibrea, F.; Smital, J.; Stefankova, M.						On open problems concerning distributional chaos for triangular maps						NONLINEAR ANALYSIS-THEORY METHODS & APPLICATIONS			74	18			7342	7346		10.1016/j.na.2011.07.052			2011-12-01	2011	We show that in the class T of the triangular maps (x, y) bar right arrow (f(x), g(x)(y)) of the square there is a map of type 2(infinity) with non-minimal recurrent points which is not DC3. We also show that every DC1 continuous map of a compact metric space has a trajectory which cannot be (weakly) approximated by trajectories of compact periodic sets. These two results make possible to answer …						0			0	0362-546X		WOS:000295714200044
J	Osborne, Todd Z.; Bruland, Gregory L.; Newman, Susan; Reddy, K. Ramesh; Grunwald, Sabine						Spatial distributions and eco-partitioning of soil biogeochemical properties in the Everglades National Park						ENVIRONMENTAL MONITORING AND ASSESSMENT			183	2012-01-04			395	408		10.1007/s10661-011-1928-7			2011-12-01	2011	Large-scale ecosystem restoration efforts, such as those in the Florida Everglades, can be long-term and resource intensive. To gauge success, restoration efforts must have a means to evaluate positive or negative results of instituted activities. Edaphic properties across the Everglades landscape have been determined to be a valuable metric for such evaluation, and as such, a baseline condition …						0			0	0167-6369		WOS:000296062700027
J	Graham, Barney S.						Future Opportunities for Passive Immunity Against Viral Diseases						JOURNAL OF INFECTIOUS DISEASES			204	11			1648	1650		10.1093/infdis/jir628			DEC 1 2011	2011							0			0	0022-1899		WOS:000296297900002
J	Neff, Christopher						Speak up for sharks						NEW SCIENTIST			212	2840			28	29					NOV 26 2011	2011							0			0	0262-4079		WOS:000297614800017
J	Hosokawa, Yoichiroh; Ochi, Haruki; Iino, Takanori; Hiraoka, Akihiro; Tanaka, Mikiko						Photoporation of Biomolecules into Single Cells in Living Vertebrate Embryos Induced by a Femtosecond Laser Amplifier						PLOS ONE			6	11					e27677	10.1371/journal.pone.0027677			NOV 16 2011	2011	Introduction of biomolecules into cells in living animals is one of the most important techniques in molecular and developmental biology research, and has potentially broad biomedical implications. Here we report that biomolecules can be introduced into single cells in living vertebrate embryos by photoporation using a femtosecond laser amplifier with a high pulse energy and a low repetition rate…						1			1	1932-6203		WOS:000297555400082
J	Lindgren, Johan; Everhart, Michael J.; Caldwell, Michael W.						Three-Dimensionally Preserved Integument Reveals Hydrodynamic Adaptations in the Extinct Marine Lizard Ectenosaurus (Reptilia, Mosasauridae)						PLOS ONE			6	11					e27343	10.1371/journal.pone.0027343			NOV 16 2011	2011	The physical properties of water and the environment it presents to its inhabitants provide stringent constraints and selection pressures affecting aquatic adaptation and evolution. Mosasaurs (a group of secondarily aquatic reptiles that occupied a broad array of predatory niches in the Cretaceous marine ecosystems about 98-65 million years ago) have traditionally been considered as anguilliform …						0			0	1932-6203		WOS:000297555400036
J	Holmgren, Susanne; Olsson, Catharina						Autonomic control of glands and secretion: A comparative view						AUTONOMIC NEUROSCIENCE-BASIC & CLINICAL			165	1	SI		102	112		10.1016/j.autneu.2010.10.008			NOV 16 2011	2011	The autonomic nervous system together with circulating and local hormones control secretion from glands. This article summarizes histochemical and functional studies on the autonomic innervation and control of secretory glands in non-mammalian vertebrates, including secretion of saliva in the mouth and gastric acid in the stomach, secretion of enzymes and bicarbonate from the pancreas and gut wal…						1			1	1566-0702		WOS:000296996400008
J	Dos Santos, Sandra; Mazan, Sylvie; Venkatesh, Byrappa; Cohen-Tannoudji, Joelle; Querat, Bruno						Emergence and evolution of the glycoprotein hormone and neurotrophin gene families in vertebrates						BMC EVOLUTIONARY BIOLOGY			11						332	10.1186/1471-2148-11-332			NOV 15 2011	2011	Background: The three vertebrate pituitary glycoprotein hormones (GPH) are heterodimers of a common a and a specific beta subunit. In human, they are located on different chromosomes but in a similar genomic environment. We took advantage of the availability of genomic and EST data from two cartilaginous fish species as well as from two lamprey species to identify their repertoire of neurotrophin…						0			0	1471-2148		WOS:000300430200001
J	Tenllado, Daniel; Reglero, Guillermo; Torres, Carlos F.						A combined procedure of supercritical fluid extraction and molecular distillation for the purification of alkylglycerols from shark liver oil						SEPARATION AND PURIFICATION TECHNOLOGY			83				74	81		10.1016/j.seppur.2011.09.013			NOV 15 2011	2011	Ethanolysis of squalene free shark liver oil was carried out to obtain a product mixture comprised mainly of fatty acid ethyl esters and non-esterified alkylglycerols. Purification of non-esterified alkylglycerols from this product mixture via supercritical fluid extraction and short-path distillation has been compared. The effect of temperature and mass flow in a sequential distillation strategy…						0			0	1383-5866		WOS:000297444900011
J	Wang, Xinxin; Parra, Zuly E.; Miller, Robert D.						Platypus TCR mu Provides Insight into the Origins and Evolution of a Uniquely Mammalian TCR Locus						JOURNAL OF IMMUNOLOGY			187	10			5246	5254		10.4049/jimmunol.1101113			NOV 15 2011	2011	TCR mu is an unconventional TCR that was first discovered in marsupials and appears to be absent from placental mammals and nonmammals. In this study, we show that TCRm is also present in the duckbill platypus, an egg-laying monotreme, consistent with TCR mu being ancient and present in the last common ancestor of all extant mammals. As in marsupials, platypus TCR mu is expressed in a form contai…						1			1	0022-1767		WOS:000296767300033
J	Feiner, Nathalie; Ericsson, Rolf; Meyer, Axel; Kuraku, Shigehiro						Revisiting the Origin of the Vertebrate Hox14 by Including Its Relict Sarcopterygian Members						JOURNAL OF EXPERIMENTAL ZOOLOGY PART B-MOLECULAR AND DEVELOPMENTAL EVOLUTION			316B	7			515	525		10.1002/jez.b.21426			NOV 15 2011	2011	Bilaterian Hox genes play pivotal roles in the specification of positional identities along the anteroposterior axis. Particularly in vertebrates, their regulation is tightly coordinated by tandem arrays of genes [paralogy groups (PGs)] in four gene clusters (HoxA-D). Traditionally, the uninterrupted Hox cluster (Hox1-14) of the invertebrate chordate amphioxus was regarded as an archetype of the …						0			0	1552-5007		WOS:000296146600004
J	Takechi, Masaki; Takeuchi, Masaki; Ota, Kinya G.; Nishimura, Osamu; Mochii, Makoto; Itomi, Kazu; Adachi, Noritaka; Takahashi, Maiko; Fujimoto, Satoko; Tarui, Hiroshi; Okabe, Masataka; Aizawa, Shinichi; Kuratani, Shigeru						Overview of the Transcriptome Profiles Identified in Hagfish, Shark, and Bichir: Current Issues Arising From Some Nonmodel Vertebrate Taxa						JOURNAL OF EXPERIMENTAL ZOOLOGY PART B-MOLECULAR AND DEVELOPMENTAL EVOLUTION			316B	7			526	546		10.1002/jez.b.21427			NOV 15 2011	2011	Because of their crucial phylogenetic positions, hagfishes, sharks, and bichirs are recognized as key taxa in our understanding of vertebrate evolution. The expression patterns of the regulatory genes involved in developmental patterning have been analyzed in the context of evolutionary developmental studies. However, in a survey of public sequence databases, we found that the large-scale sequenc…						0			0	1552-5007		WOS:000296146600005
J	Jewell, Oliver J. D.; Wcisel, Michelle A.; Gennari, Enrico; Towner, Alison V.; Bester, Marthan N.; Johnson, Ryan L.; Singh, Sarika						Effects of Smart Position Only (SPOT) Tag Deployment on White Sharks Carcharodon carcharias in South Africa						PLOS ONE			6	11					e27242	10.1371/journal.pone.0027242			NOV 14 2011	2011	We present 15 individual cases of sub-adult white sharks that were SPOT tagged in South Africa from 2003-2004 and have been re-sighted as recently as 2011. Our observations suggest SPOT tags can cause permanent cosmetic and structural damage to white shark dorsal fins depending on the duration of tag attachment. SPOT tags that detached within 12-24 months did not cause long term damage to the dor…						0			0	1932-6203		WOS:000297554300019
J	Moftah, Marie; Aziz, Sayeda H. Abdel; Elramah, Sara; Favereaux, Alexandre						Classification of Sharks in the Egyptian Mediterranean Waters Using Morphological and DNA Barcoding Approaches						PLOS ONE			6	11					e27001	10.1371/journal.pone.0027001			NOV 2 2011	2011	The identification of species constitutes the first basic step in phylogenetic studies, biodiversity monitoring and conservation. DNA barcoding, i.e. the sequencing of a short standardized region of DNA, has been proposed as a new tool for animal species identification. The present study provides an update on the composition of shark in the Egyptian Mediterranean waters off Alexandria, since the …						0			0	1932-6203		WOS:000297154900060
J	Hussey, Nigel E.; Chapman, Demian D.; Donnelly, Erin; Abercrombie, Debra L.; Fisk, Aaron T.						Fin-icky samples: an assessment of shark fin as a source material for stable isotope analysis						LIMNOLOGY AND OCEANOGRAPHY-METHODS			9				524	532		10.4319/lom.2011.9.524			2011-11-01	2011	Analyzing stable isotopes (SI: delta N-15 and delta C-13) in a new tissue requires rigorous testing before its general application in examining aspects of animal ecology. Shark fin provides a novel, minor invasive source material, which is important considering the conservation status of many large sharks. Fin, however, is not a single tissue but composed of multiple tissues, primarily skin and c…						1			1	1541-5856		WOS:000300378200001
J	Castaneda-Moya, Edward; Twilley, Robert R.; Rivera-Monroy, Victor H.; Marx, Brian D.; Coronado-Molina, Carlos; Ewe, Sharon M. L.						Patterns of Root Dynamics in Mangrove Forests Along Environmental Gradients in the Florida Coastal Everglades, USA						ECOSYSTEMS			14	7			1178	1195		10.1007/s10021-011-9473-3			2011-11-01	2011	Patterns of mangrove vegetation in two distinct basins of Florida Coastal Everglades (FCE), Shark River estuary and Taylor River Slough, represent unique opportunities to test hypotheses that root dynamics respond to gradients of resources, regulators, and hydroperiod. We propose that soil total phosphorus (P) gradients in these two coastal basins of FCE cause specific patterns in belowground bio…						0			0	1432-9840		WOS:000300144100011
J	Carlisle, Aaron B.; Perle, Christopher R.; Goldman, Kenneth J.; Block, Barbara A.						Seasonal changes in depth distribution of salmon sharks (Lamna ditropis) in Alaskan waters: implications for foraging ecology						CANADIAN JOURNAL OF FISHERIES AND AQUATIC SCIENCES			68	11			1905	1921		10.1139/F2011-105			2011-11-01	2011	The salmon shark, Lamna ditropis, is an endothermic, apex predator in the productive waters of the Gulf of Alaska (GOA). To understand their role in these productive habitats and to identify and better understand their interactions with commercially important species and fisheries, detailed information regarding the distribution of the salmon shark is required. Archival data records from eight re…						0			0	0706-652X		WOS:000298441500004
J	Ho, Ju-shey; Lin, Ching-Long						Redescription of Dinemoura discrepans Cressey, 1967 (Copepoda: Pandaridae) parasitic on four species of sharks off southeast coast of Taiwan						FOLIA PARASITOLOGICA			58	4			311	317					2011-11-01	2011	Dinemoura discrepans Cressey, 1967 (Copepoda, Siphonostomatoida, Pandaridae) is redescribed based on the specimens taken from four species of sharks caught off the southeast coast of Taiwan. The four species of sharks are: pelagic thresher, Alopias pelagicus Nakamura; bigeye thresher, A. superciliosus Lowe; blacktip shark. Carcharhinus limbatus (Muller et Henle); and oceanic whitetip shark, C. lo…						0			0	0015-5683		WOS:000298314800007
J	Al-Salman, Ahmad; AlSharawi, Ziyad						A new characterization of periodic oscillations in periodic difference equations						CHAOS SOLITONS & FRACTALS			44	11			921	928		10.1016/j.chaos.2011.07.011			2011-11-01	2011	In this paper, we characterize periodic solutions of p-periodic difference equations. We classify the periods into multiples of p and nonmultiples of p. We show that the elements of the set of multiples of p follow the well-known Sharkovsky's ordering multiplied by p. On the other hand, we show that the elements of the set Gamma(p) of nonmultiples of p are independent in their existence. Moreover…						0			0	0960-0779		WOS:000297494400001
J	Last, P. R.; White, W. T.						Biogeographic patterns in the Australian chondrichthyan fauna						JOURNAL OF FISH BIOLOGY			79	5			1193	1213		10.1111/j.1095-8649.2011.03095.x			2011-11-01	2011	The major biogeographic structure and affinities of the Australian chondrichthyan fauna were investigated at both interregional and intraregional scales and comparisons made with adjacent bioregions. Faunal lists were compiled from six geographical regions with species from these regions assigned to distributional classes and broad habitat categories. Australian species were further classified on…						0			0	0022-1112		WOS:000297456300009
J	Mabragana, E.; Figueroa, D. E.; Scenna, L. B.; de Astarloa, J. M. Diaz; Colonello, J. H.; Delpiani, G.						Chondrichthyan egg cases from the south-west Atlantic Ocean						JOURNAL OF FISH BIOLOGY			79	5			1261	1290		10.1111/j.1095-8649.2011.03111.x			2011-11-01	2011	Egg cases of 21 oviparous chondrichthyan species from the south-west Atlantic Ocean are described and compared. The catshark Schroederichthys bivius has a cigar-shaped egg case with curled tendrils only at the posterior end. Egg cases of the elephant fish Callorhinchus callorynchus are spindle-shaped with anterior and posterior tubular extensions and lateral flanges. The skate Amblyraja doellojur…						0			0	0022-1112		WOS:000297456300012
J	Robinson, D. P.; Baverstock, W.; Al-Jaru, A.; Hyland, K.; Khazanehdari, K. A.						Annually recurring parthenogenesis in a zebra shark Stegostoma fasciatum						JOURNAL OF FISH BIOLOGY			79	5			1376	1382		10.1111/j.1095-8649.2011.03110.x			2011-11-01	2011	A zebra shark, Stegostoma fasciatum, held in captivity at the Burj Al Arab aquarium, produced embryos and pups in the absence of a male. A total of 15 pups were produced from eggs laid within the aquarium over a period of four consecutive years commencing 2007. Parthenogenesis was confirmed through DNA analysis for three pups sampled during the first two consecutive egg cycles and is presumed to …						0			0	0022-1112		WOS:000297456300021
J	Myrta, A.; Palmisano, F.; Pulaj, B.; Susuri, L. R.; Boscia, D.						INCIDENCE OF PLUM POX VIRUS AND ITS STRAINS IN KOSOVO						JOURNAL OF PLANT PATHOLOGY			93	3			725	728					2011-11-01	2011	Sharka, caused by Plum pox virus (PPV), is the most destructive viral disease of plum, apricot and peach. Although PPV is widespread in all fruit-growing areas of eastern European countries, and causes serious yield losses, little is known about its occurrence and distribution in Kosovo. Therefore, a survey was conducted in orchards and nurseries at 18 sites located in seven different districts t…						0			0	1125-4653		WOS:000297609800021
J	Clemente-Moreno, M. J.; Piqueras, A.; Hernandez, J. A.						Implication of peroxidase activity in development of healthy and PPV-infected micropropagated GF305 peach plants						PLANT GROWTH REGULATION			65	2			359	367		10.1007/s10725-011-9608-8			2011-11-01	2011	In this work, we describe the micropropagation of PPV-infected GF305 peach plants for their use as a continuous source of PPV inoculums. We observed that PPV was maintained in each sub-culture as well as in the complete micropropagation cycle, including shoot proliferation, rooting and acclimatization to ex vitro conditions. We assayed the addition of fructose and ferulic acid to the multiplicati…						0			0	0167-6903		WOS:000297620300017
J	Ouedraogo, Ousseni; Amyot, Marc						Effects of various cooking methods and food components on bioaccessibility of mercury from fish						ENVIRONMENTAL RESEARCH			111	8			1064	1069		10.1016/j.envres.2011.09.018			2011-11-01	2011	Fish consumption is the main source of human exposure to mercury. Studies from specific human populations have reported Hg levels lower than those modeled from consumption data. These discrepancies between expected and measured Hg levels may be explained by differences in dietary habits such as cooking methods and food components on fish Hg bioavailability. We assessed the effects of three cookin…						0			0	0013-9351		WOS:000297179500010
J	Bruce, Isaac						Shark compound bites back against viruses.						Future medicinal chemistry			3	15			1859						2011-Nov	2011							0			0	1756-8927		MEDLINE:22023029
J	Hayward, C. J.; Svane, I.; Lachimpadi, S. K.; Itoh, N.; Batt, N. J.; Nowak, B. F.						Sea lice infections of wild fishes near ranched southern bluefin tuna (Thunnus maccoyii) in South Australia						AQUACULTURE			320	2012-03-04	SI		178	182		10.1016/j.aquaculture.2010.10.039			NOV 1 2011	2011	In contrast with sea lice infestations of other farmed fishes, attached larval stages of sea lice on ranched southern bluefin tuna (Thunnus maccoyii) are rarely detected. In this study, we monitored sea lice on ranched T. maccoyii and surveyed wild fishes adjacent to ranching sea cages over a 3-month period in early 2009. Prevalence of the adult Caligus chiastos on tuna within a day of arrival at…		8th International Conference on Sea Lice	MAY 09-12, 2010	Univ Victoria; Fisheries & Oceans Canada; Intervet/Schering Plough; Novartis Anim Hlth; Pacific Salmon Forum; Genome British Columbia; British Columbia Minist Agr; New Brunswick Dept Agr & Aduaculture; British Columbia Salmon Farmers Assoc; Marine Harvest Int; Cooke Aquaculture; Watershed Watch Soc & Math Informat Technol & Complex Syst (MITACS)	Victoria, CANADA	1			1	0044-8486		WOS:000297185700007
J	Wang, Hua; Wang, Han; Yang, Lei; Zu, Yuan-gang; Liu, Fang; Liu, Ting-ting						Comparative effect of carnosic acid, BHT and alpha-tocopherol on the stability of squalene under heating and UV irradiation						FOOD RESEARCH INTERNATIONAL			44	9			2730	2734		10.1016/j.foodres.2011.05.036			2011-11-01	2011	Squalene is prone to auto-oxidation because it has a high content of unsaturated bonds. The effects of carnosic acid (CA) and two common antioxidants (butylated hydroxytoluene and alpha-tocopherol) on oxidative stability in squalene at different accelerated conditions (heating and UV irradiation) were compared. The investigation focused on the increase in peroxide and thiobarbituric acid-reactive…						0			0	0963-9969		WOS:000296798300022
J	[Anonymous]						Shark compound bites back against viruses						FUTURE MEDICINAL CHEMISTRY			3	15			1859	1859					2011-11-01	2011							0			0	1756-8919		WOS:000297162400003
J	Patterson, James C.; Sepulveda, Chugey A.; Bernal, Diego						The Vascular Morphology and In Vivo Muscle Temperatures of Thresher Sharks (Alopiidae)						JOURNAL OF MORPHOLOGY			272	11			1353	1364		10.1002/jmor.10989			2011-11-01	2011	The thresher sharks comprise a single family (Alopiidae) of pelagic sharks most easily recognized by the elongate dorsal lobe of their caudal fin. Despite morphological similarities among the alopiids, the common thresher (Alopias vulpinus) is unique in that its red, aerobic myotomal muscle (RM) is medially positioned (i.e., closer to the vertebrae), its systemic blood is supplied through a later…						0			0	0362-2525		WOS:000296979700007
J	Coulson, M. W.; Denti, D.; Van Guelpen, L.; Miri, C.; Kenchington, E.; Bentzen, P.						DNA barcoding of Canada's skates						MOLECULAR ECOLOGY RESOURCES			11	6			968	978		10.1111/j.1755-0998.2011.03034.x			2011-11-01	2011	DNA-based identifications have been employed across broad taxonomic ranges and provide an especially useful tool in cases where external identification may be problematic. This study explored the utility of DNA barcoding in resolving skate species found in Atlantic Canadian waters. Most species were clearly resolved, expanding the utility for such identification on a taxonomically problematic gro…						0			0	1755-098X		WOS:000296421200006
J	Wu, Baojun; Jin, Meng; Gong, Jing; Du, Xiumin; Bai, Zengliang						Dynamic evolution of CIKS (TRAF3IP2/Act1) in metazoans						DEVELOPMENTAL AND COMPARATIVE IMMUNOLOGY			35	11			1186	1192		10.1016/j.dci.2011.03.027			2011-11-01	2011	CIKS (TRAF3IP2/Act1) is important for inflammatory responses and autoimmunity control through its dual functions in CD4OL/BAFF and IL17 signaling in mammalians. In this study, we performed comparative and evolutionary analyses of CIKSs from metazoans. Although nematode (Caenorabditis elegans) and sea urchin (Strongylocentrotus purpuratus) have IL17 and IL17 receptors, we found no CIKS in their ge…						2			2	0145-305X		WOS:000296300700010
J	Dasiewicz, Patricia J.; Conlon, J. Michael; Anderson, W. Gary						Cardiovascular and vasoconstrictive actions of skate bradykinin in the little skate, Leucoraja erinacea (Elasmobranchii)						GENERAL AND COMPARATIVE ENDOCRINOLOGY			174	2			89	96		10.1016/j.ygcen.2011.08.002			NOV 1 2011	2011	The vasoconstrictive and cardiovascular actions of a recently identified bradykinin (BK)-related peptide (Gly-Ile-Thr-Ser-Trp-Leu-Pro-Phe) from the little skate, Leucoraja erinacea were examined in the unanesthetised little skate. Intra-arterial administration of a skate BK (0.1-1 nmol kg(-1)) produced a hypertensive response with a rise in blood pressure reaching a maximum elevation of 28.7 +/- …						0			0	0016-6480		WOS:000296218000003
J	Chapman, Demian D.; Simpfendorfer, Colin A.; Wiley, Tonya R.; Poulakis, Gregg R.; Curtis, Caitlin; Tringali, Michael; Carlson, John K.; Feldheim, Kevin A.						Genetic Diversity Despite Population Collapse in a Critically Endangered Marine Fish: The Smalltooth Sawfish (Pristis pectinata)						JOURNAL OF HEREDITY			102	6			643	652		10.1093/jhered/esr098			NOV-DEC 2011	2011	Sawfish (family Pristidae) are among the most critically endangered marine fish in the world, yet very little is known about how genetic bottlenecks, genetic drift, and inbreeding depression may be affecting these elasmobranchs. In the US Atlantic, the smalltooth sawfish (Pristis pectinata) has declined to 1-5% of its abundance in the 1900s, and its core distribution has contracted to southwest F…						0			0	0022-1503		WOS:000296100900001
J	Booth, Warren; Million, Larry; Reynolds, R. Graham; Burghardt, Gordon M.; Vargo, Edward L.; Schal, Coby; Tzika, Athanasia C.; Schuett, Gordon W.						Consecutive Virgin Births in the New World Boid Snake, the Colombian Rainbow Boa, Epicrates maurus						JOURNAL OF HEREDITY			102	6			759	763		10.1093/jhered/esr080			NOV-DEC 2011	2011	Until recently, facultative automictic parthenogenesis within the squamate reptiles exhibiting ZZ:ZW genetic sex determination has resulted in single reproductive events producing male (ZZ) or female (ZW) offspring. With the recent discovery of viable parthenogenetically produced female (WW) Boa constrictors, the existence of further parthenogenetic events resulting in WW females was questioned. …						1			1	0022-1503		WOS:000296100900013
J	Goedeke, Stefan						Simulation of groundwater mounding at a West Australian mine site						ENVIRONMENTAL EARTH SCIENCES			64	5			1363	1373		10.1007/s12665-011-0961-8			2011-11-01	2011	Few studies exist that investigate the potential impact of groundwater mounding due to mining near an environmentally sensitive area in a real world scenario. This paper presents a case study in which the development and extent of groundwater mounding due to mining near the Shark Bay World Heritage Property (SBWHP) in Western Australia (WA) has been simulated. A numerical model was developed that…						0			0	1866-6280		WOS:000295845900016
J	Yanez, Julian; Folgueira, Monica; Koehler, Elisabeth; Martinez, Cristina; Anadon, Ramon						Connections of the Terminal Nerve and the Olfactory System in Two Galeomorph Sharks: An Experimental Study Using a Carbocyanine Dye						JOURNAL OF COMPARATIVE NEUROLOGY			519	16			3202	3217		10.1002/cne.22674			NOV 1 2011	2011	In elasmobranchs the terminal nerve courses separately from the olfactory nerve. This characteristic makes elasmobranchs excellent models to study the anatomy and function of these two systems. Here we study the neural connections of the terminal nerve and olfactory system in two sharks by experimental tracing methods using carbocyanine dyes. The main projections from the terminal nerve system (c…						0			0	0021-9967		WOS:000295714300006
J	Baker, J. D.; Becker, B. L.; Wurth, T. A.; Johanos, T. C.; Littnan, C. L.; Henderson, J. R.						Translocation as a tool for conservation of the Hawaiian monk seal						BIOLOGICAL CONSERVATION			144	11			2692	2701		10.1016/j.biocon.2011.07.030			2011-11-01	2011	The deteriorating demographic status of the endangered Hawaiian monk seal has motivated renewed and expanded proposals for conservation action, including translocation of seals to improve survival. Over the past three decades, numerous monk seal translocations have been conducted with a variety of objectives, including mitigating shark predation and conspecific male aggression, reducing human-sea…						0			0	3207-06-01		WOS:000295442900018
J	Ayers, Morag J.; Scharler, Ursula M.						Use of sensitivity and comparative analyses in constructing plausible trophic mass-balance models of a data-limited marine ecosystem - The KwaZulu-Natal Bight, South Africa						JOURNAL OF MARINE SYSTEMS			88	2			298	311		10.1016/j.jmarsys.2011.05.006			2011-11-01	2011	Ecosystem modelling allows for an understanding of the structure and functioning of data-limited ecosystems provided that models undergo extensive sensitivity analyses to explore the levels of uncertainty. We explored one such data-limited system, the KwaZulu-Natal (KZN) Bight, a river-influenced bight on the east coast of South Africa. Potential system states of the KZN Bight were created by con…						0			0	0924-7963		WOS:000293314900012
J	Fu Meng-na; Wang Jun; Ding Shao-xiong; Du Jia-ying; Su Yong-quan						Studies on the genetic structure and genetic subdivision of white spotted bamboo shark, Chiloscyllium plagiosum, by analysing mitochondrial Cyt b genes						Journal of Tropical Oceanography			29	6			86	91					2010-11-01	2010	The genetic diversity and genetic structure of Chilosullium plagiosum were assessed from three populations (Hainan, Guangdong, and Fujian), using mitochondrial Cyt b sequences. The complete mitochondrial Cyt h gene sequences (1146 nucleotides) from 71 individuals were defined as 15 haplotypes by 15 polymorphic sites after sequence alignment. The low levels of nucleotide diversity (pi=0.00254) and…						0			0	1009-5470		BCI:BCI201100434876
J	Rouse, Greg W.; Goffredi, Shana K.; Johnson, Shannon B.; Vrijenhoek, Robert C.						Not whale-fall specialists, Osedax worms also consume fishbones						BIOLOGY LETTERS			7	5			736	739		10.1098/rsbl.2011.0202			OCT 23 2011	2011	Marine annelid worms of the genus Osedax exploit sunken vertebrate bones for food. To date, the named species occur on whale or other mammalian bones, and it is argued that Osedax is a whale-fall specialist. To assess whether extant Osedax species could obtain nutrition from non-mammalian resources, we deployed teleost bones and calcified shark cartilage at approximately 1000 m depth for five mon…						1			2	1744-9561		WOS:000294768400029
J	Andutta, Fernando P.; Ridd, Peter V.; Wolanski, Eric						Dynamics of hypersaline coastal waters in the Great Barrier Reef						ESTUARINE COASTAL AND SHELF SCIENCE			94	4			299	305		10.1016/j.ecss.2011.06.009			OCT 20 2011	2011	The coastal waters of the Great Barrier Reef (GBR) are hypersaline (salinity similar to 37) during the dry season as a result of evaporation greatly exceeding rainfall, of shallow waters, and of the presence of numerous bays along the coast preventing rapid flushing. These hypersaline waters are not flushed out by salinity-driven baroclinic currents because these waters are vertically well-mixed.…						1			1	0272-7714		WOS:000295109900001
J	Mohamed, Marwah; Moussa, I. M.; Mohamed, Kh. F.; Samir, Ahmed; Nasr, E. A.; Ashgan, M. H.; AlRejaie, Salim; Hatem, M. E.						BACTEC MGIT 960 (TM) system for screening of Mycobacterium tuberculosis complex among cattle						AFRICAN JOURNAL OF BIOTECHNOLOGY			10	63			13919	13923					OCT 17 2011	2011	Bovine tuberculosis remains a disease of economic and public health importance in developing countries. The largest number of new cases of tuberculosis usually occurs in South-East Asia region and Africa. This study was aimed to evaluate the recent technique (BACTEC MGIT 960 (TM) system) for screening of Mycobacterium tuberculosis complex among cattle in Egypt. From the 1180 cattle examined in th…						0			0	1684-5315		WOS:000298547500032
J	Droege, Jasmin; Makalowski, Wojciech						Phylogenetic analysis reveals wide distribution of globin X						BIOLOGY DIRECT			6						54	10.1186/1745-6150-6-54			OCT 17 2011	2011	The vertebrate globin gene repertoire consists of seven members that differ in terms of structure, function and phyletic distribution. While hemoglobin, myoglobin, cytoglobin, and neuroglobin are present in almost all gnathostomes examined so far, other globin genes, like globin X, are much more restricted in their phyletic distribution. Till today, globin X has only been found in teleost fish an…						0			0	1745-6150		WOS:000296607800001
J	Human, Brett A.						Description of a unique catshark egg capsule (Chondrichthyes: Scyliorhinidae) from the North West Shelf, Western Australia						Aqua			17	4			199	209					OCT 15 2011	2011	A review of the chondrichthyan reference collection of the Western Australian Museum led to the discovery of several lots of previously undescribed catshark egg capsules (Chondrichthyes: Scyliorhinidae) that initially could not be assigned to any particular genus due to their novel morphology. These egg capsules bear unique, well-developed ridges running longitudinally along the length of the egg…						0			0	0945-9871		BCI:BCI201100721226
J	Tuetken, Thomas; Vennemann, Torsten W.; Pfretzschner, Hans-U.						Nd and Sr isotope compositions in modern and fossil bones - Proxies for vertebrate provenance and taphonomy						GEOCHIMICA ET COSMOCHIMICA ACTA			75	20			5951	5970		10.1016/j.gca.2011.07.024			OCT 15 2011	2011	Rare earth elements (REE), while not essential for the physiologic functions of animals, are ingested and incorporated in ppb concentrations in bones and teeth. Nd isotope compositions of modern bones of animals from isotopically distinct habitats demonstrate that the (143)Nd/(144)Nd of the apatite can be used as a fingerprint for bedrock geology or ambient water mass. This potentially allows the…						2			2	0016-7037		WOS:000295641600009
J	Jattiot, Romain; Krogmann, Lars; Nel, Andre						Revision of Prosyntexis from the Lower Cretaceous Crato Formation of Brazil (Hymenoptera: Sepulcidae: Trematothoracinae)						ZOOTAXA				3058			55	62					OCT 13 2011	2011	The fossil Prosyntexis species from the Lower Cretaceous Crato Formation of Brazil are revised. The examination of three new specimens of the sepulcid species Prosyntexis gouleti Sharkey, 1990 allows amending its species diagnosis by adding new morphological characters, especially from the wing venation and from the hitherto unknown antenna. A close comparison with Prosyntexis legitima Martins-Ne…						1			1	1175-5326		WOS:000295924500004
J	Ward-Paige, Christine A.; Lotze, Heike K.						Assessing the Value of Recreational Divers for Censusing Elasmobranchs						PLOS ONE			6	10					e25609	10.1371/journal.pone.0025609			OCT 10 2011	2011	Background: Around the world, researchers are using the observations and experiences of citizens to describe patterns in animal populations. This data is often collected via ongoing sampling or by synthesizing past experiences. Since elasmobranchs are relatively rare, obtaining data for broad-scale trend analysis requires high sampling effort. Elasmobranchs are also relatively large and conspicuo…						0			0	1932-6203		WOS:000295971700013
J	[Anonymous]						Giant Sanctuary for Sharks						SCIENCE			333	6052			23	24					OCT 7 2011	2011							0			0	0036-8075		WOS:000295580300008
J	Sathiadhas, R.; Narayanakumar, R.; Aswathy, N.						Efficiency of domestic marine fish marketing in India - a macro analysis						INDIAN JOURNAL OF FISHERIES			58	4			125	131					OCT-DEC 2011	2011	The rapid economic growth and expansion of domestic retail sector in India has created a significant market for fresh and processed fish and fishery products within the country. The increase in the prices of fresh as well as processed fish is very much higher than all other food products. A macro level analysis of the efficiency of domestic marine fish marketing in India during the period 2000-20…						0			0	0970-6011		WOS:000303268200019
J	Lambert, Patrick; Pascal, Thierry						Mapping Rm2 gene conferring resistance to the green peach aphid (Myzus persicae Sulzer) in the peach cultivar "Rubira (R)"						TREE GENETICS & GENOMES			7	5			1057	1068		10.1007/s11295-011-0394-2			2011-10-01	2011	The green peach aphid (GPA), Myzus persicae (Sulzer), is a widespread pest insect that significantly reduces yield in peach orchards [Prunus persica (L.) Batsch]. Chemical control of the GPA population in the orchards showed little efficiency because of the development of resistance to most classes of insecticides. Biological control partially gave convincing results. Breeding for resistant peach…						2			2	1614-2942		WOS:000299506900014
J	Coelho, Rui; Fernandez-Carvalho, Joana; Amorim, Sergio; Santos, Miguel N.						Age and growth of the smooth hammerhead shark, Sphyrna zygaena, in the Eastern Equatorial Atlantic Ocean, using vertebral sections						AQUATIC LIVING RESOURCES			24	4			351	357		10.1051/alr/2011145			2011-10-01	2011	The smooth hammerhead shark Sphyrna zygaena (Sphyrnidae) is regularly caught as bycatch in pelagic longline fisheries, but is one of the least studied of all pelagic sharks. Recently, ICCAT (International Commission for the Conservation of Atlantic Tunas) issued recommendations underlining the need for more studies on the life history parameters of this and other pelagic shark species. To this en…						0			0	0990-7440		WOS:000298634700002
J	Fernandez-Carvalho, Joana; Coelho, Rui; Erzini, Karim; Santos, Miguel Neves						Age and growth of the bigeye thresher shark, Alopias superciliosus, from the pelagic longline fisheries in the tropical northeastern Atlantic Ocean, determined by vertebral band counts						AQUATIC LIVING RESOURCES			24	4			359	368		10.1051/alr/2011046			2011-10-01	2011	The bigeye thresher, Alopias supercilious, is commonly caught as bycatch in pelagic longline fisheries targeting swordfish. Little information is yet available on the biology of this species, however. As part of an ongoing study, observers sent aboard fishing vessels have been collecting set of information that includes samples of vertebrae, with the aim of investigating age and growth of A. supe…						0			0	0990-7440		WOS:000298634700003
J	Nomiyama, Kei; Uchiyama, Yukiko; Horiuchi, Satoko; Eguchi, Akifumi; Mizukawa, Hazuki; Hirata, Sawako Horai; Shinohara, Ryota; Tanabe, Shinsuke						Organohalogen compounds and their metabolites in the blood of Japanese amberjack (Seriola quinqueradiata) and scalloped hammerhead shark (Sphyrna lewini) from Japanese coastal waters						CHEMOSPHERE			85	3			315	321		10.1016/j.chemosphere.2011.06.092			2011-10-01	2011	Information on accumulation of polychlorinated biphenyl metabolites (OH-PCBs) and hydroxylated polybrominated diphenyl ethers (OH-PBDEs) in the blood of marine fish is limited. The present study, we determined the residue levels and patterns of PCBs, OH-PCBs, PBDEs, OH-PBDEs and methoxylated PBDEs (MeO-PBDEs) in the blood collected from scalloped hammerhead shark (Sphyrna lewini) and Japanese amb…						0			0	0045-6535		WOS:000297661900004
J	Morrison, Thomas A.; Yoshizaki, Jun; Nichols, James D.; Bolger, Douglas T.						Estimating survival in photographic capture-recapture studies: overcoming misidentification error						METHODS IN ECOLOGY AND EVOLUTION			2	5			454	463		10.1111/j.2041-210X.2011.00106.x			2011-10-01	2011	1. For many species, noninvasive photographic identification offers a powerful and costeffective method for estimating demographic parameters and testing ecological hypotheses in large populations. However, this technique is prone to misidentification errors that can severely bias capturerecapture estimates.2. We present a simple ad hoc data conditioning technique that minimizes bias in survival …						1			1	2041-210X		WOS:000297323700004
J	Musyl, Michael K.; Brill, Richard W.; Curran, Daniel S.; Fragoso, Nuno M.; McNaughton, Lianne M.; Nielsen, Anders; Kikkawa, Bert S.; Moyes, Christopher D.						Postrelease survival, vertical and horizontal movements, and thermal habitats of five species of pelagic sharks in the central Pacific Ocean						FISHERY BULLETIN			109	4			341	368					2011-10-01	2011	From 2001 to 2006, 71 pop-up satellite archival tags (PSATs) were deployed on five species of pelagic shark (blue shark [Prionace glauca]; shortfin mako [Isurus oxyrinchus]; silky shark [Carcharhinus falciformis]; oceanic whitetip shark [C. longimanus]; and bigeye thresher [Alopias superciliosus]) in the central Pacific Ocean to determine speciesspecific movement patterns and survival rates after…						0			0	0090-0656		WOS:000296395600001
J	O'Connell, Craig P.; Abel, Daniel C.; Stroud, Eric M.; Rice, Patrick H.						Analysis of permanent magnets as elasmobranch bycatch reduction devices in hook-and-line and longline trials						FISHERY BULLETIN			109	4			394	401					2011-10-01	2011	Previous studies indicate that elasmobranch fishes (sharks, skates and rays) detect the Earth's geomagnetic field by indirect magnetoreception through electromagnetic induction, using their ampullae of Lorenzini. Applying this concept, we evaluated the capture of elasmobranchs in the presence of permanent magnets in hook-and-line and inshore longline fishing experiments. Hooks with neodymium-iron…						0			0	0090-0656		WOS:000296395600004
J	Andrews, Allen H.; Natanson, Lisa J.; Kerr, Lisa A.; Burgess, George H.; Cailliet, Gregor M.						Bomb radiocarbon and tag-recapture dating of sandbar shark (Carcharhinus plumbeus)						FISHERY BULLETIN			109	4			454	465					2011-10-01	2011	The sandbar shark (Carcharhinus plumbeus)was the cornerstone species of western North Atlantic and Gulf of Mexico large coastal shark fisheries until 2008 when they were allocated to a research-only fishery. Despite decades of fishing on this species, important life history parameters, such as age and growth, have not been well known. Some validated age and growth information exists for sandbar s…						0			0	0090-0656		WOS:000296395600009
J	Aguilera Socorro, Orangel Antonio; Feijo Ramos, Maria Ines; Paes, Eduardo Tavares; Regina Ferreira Costa, Sue Anne; Sanchez-Villagra, Marcelo R.						The Neogene tropical America fish assemblage and the paleobiogeography of the Caribbean region						Swiss Journal of Palaeontology			130	2			217	240		10.1007/s13358-011-0020-9			2011-10-01	2011	This first analysis of the marine fish fossil record in the Caribbean region during the Neogene is based on comprehensive new faunal compilation lists at the generic level from basins of nine Central and South American countries during Miocene and Pliocene times. Joint ordination and classification techniques were used to analyze data comprising 236 genera and 346 species. Principal Component Ana…						0			0	1664-2376; 1664-2384		BCI:BCI201100751647
J	Vialle, Nicolas; Adnet, Sylvain; Cappetta, Henri						A new shark and ray fauna from the Middle Miocene of Mazan, Vaucluse (southern France) and its importance in interpreting the paleoenvironment of marine deposits in the southern Rhodanian Basin						Swiss Journal of Palaeontology			130	2			241	258		10.1007/s13358-011-0025-4			2011-10-01	2011	Recent paleontological excavations of the Middle Miocene sandstones (top of the "Schlier" facies) near Mazan, Vaucluse (southern France) uncovered a rich selachian teeth assemblage including 34 shark and ray species. This great diversity of selachian taxa provides new information about the palaeoenvironmental settings of some Middle Miocene deposits in the southern Rhodanian basin. For instance, …						0			0	1664-2376; 1664-2384		BCI:BCI201100751648
J	Huang, Lin; Huang, Qing-Yu; Chen, Hai-Bin; Huang, Fu-Sheng; Huang, He-Qing						Differential Proteins of the Optic Ganglion in Octopus vulgaris Under Methanol Stress Revealed Using Proteomics						APPLIED BIOCHEMISTRY AND BIOTECHNOLOGY			165	2012-03-04			978	988		10.1007/s12010-011-9313-0			2011-10-01	2011	An analytical approach using the two-dimensional polyacrylamide gel electrophoresis (2D-PAGE) technique separated the proteome from the optic ganglia of Octopus vulgaris (OVOG). Approximately 600 protein spots were detected from the extraction when applying 150 mu g protein to a 2D-PAGE gel in the pH range 5.0-8.0. Compared to the control, significant changes of 18 protein spots were observed in …						1			1	0273-2289		WOS:000296640000020
J	Jiao, Yan; Cortes, Enric; Andrews, Kate; Guo, Feng						Poor-data and data-poor species stock assessment using a Bayesian hierarchical approach						ECOLOGICAL APPLICATIONS			21	7			2691	2708					2011-10-01	2011	Appropriate inference for stocks or species with low-quality data (poor data) or limited data (data poor) is extremely important. Hierarchical Bayesian methods are especially applicable to small-area, small-sample-size estimation problems because they allow poor-data species to borrow strength from species with good-quality data. We used a hammerhead shark complex as an example to investigate the…						0			0	1051-0761		WOS:000296139200027
J	Ernesto Arias-Gonzalez, Jesus; Gonzalez-Gandara, Carlos; Luis Cabrera, Jose; Christensen, Villy						Predicted impact of the invasive lionfish Pterois volitans on the food web of a Caribbean coral reef						ENVIRONMENTAL RESEARCH			111	7	SI		917	925		10.1016/j.envres.2011.07.008			2011-10-01	2011	The invasion of lionfish in the Caribbean is causing grave concern because of its deleterious impacts on coral reef food-webs. We have used an Ecopath-with-Ecosim model to predict the impacts of lionfish invasion on a coral reef community based on pre-invasion fish community data. Forty-six groups were defined, and an initial Ecopath model was balanced with a near-zero biomass of lionfish. In Eco…						0			0	0013-9351		WOS:000295659700005
J	Arceneaux, A.; Bengston, R. L.; Selim, H. M.						Effect of residue management on sugarcane yield						INTERNATIONAL SUGAR JOURNAL			113	1354			746	746					2011-10-01	2011							0			0	0020-8841		WOS:000296823700062
J	Cole, Nicholas J.; Hall, Thomas E.; Don, Emily K.; Berger, Silke; Boisvert, Catherine A.; Neyt, Christine; Ericsson, Rolf; Joss, Jean; Gurevich, David B.; Currie, Peter D.						Development and Evolution of the Muscles of the Pelvic Fin						PLOS BIOLOGY			9	10					e1001168	10.1371/journal.pbio.1001168			2011-10-01	2011	Locomotor strategies in terrestrial tetrapods have evolved from the utilisation of sinusoidal contractions of axial musculature, evident in ancestral fish species, to the reliance on powerful and complex limb muscles to provide propulsive force. Within tetrapods, a hindlimb-dominant locomotor strategy predominates, and its evolution is considered critical for the evident success of the tetrapod t…						0			0	1544-9173		WOS:000296735400001
J	Bethea, Dana M.; Carlson, John K.; Hollensead, Lisa D.; Papastamatiou, Yannis P.; Graham, Brittany S.						A COMPARISON OF THE FORAGING ECOLOGY AND BIOENERGETICS OF THE EARLY LIFE-STAGES OF TWO SYMPATRIC HAMMERHEAD SHARKS						BULLETIN OF MARINE SCIENCE			87	4			873	889		10.5343/bms.2010.1047			2011-10-01	2011	Juvenile scalloped hammerhead sharks, Sphyrna lewini (Griffith and Smith, 1834), were collected in northwest Florida to examine foraging ecology, bioenergetics, and trophic level [30-60 cm fork length (FL); mean FL = 41.5 cm; n = 196]. Diet analysis was performed using single and compound measures of prey quantity, as well as seven broad diet categories. Diet composition and estimated daily ratio…						1			1	4977-07-01		WOS:000296074600009
J	O'Toole, Amanda C.; Danylchuk, Andy J.; Goldberg, Tony L.; Suski, Cory D.; Philipp, David P.; Brooks, Edd; Cooke, Steven J.						Spatial ecology and residency patterns of adult great barracuda (Sphyraena barracuda) in coastal waters of The Bahamas						MARINE BIOLOGY			158	10			2227	2237		10.1007/s00227-011-1728-1			2011-10-01	2011	Great barracuda (Sphyraena barracuda) were implanted with acoustic telemetry transmitters (n = 42) and monitored within a stationary acoustic receiver array (n = 53 receivers) in The Bahamas to examine residency, seasonal movements, and habitat use. Barracuda were monitored for up to 980 days and remained within the array area similar to 33% (median value) of the time. Most tagged barracuda were …						0			0	0025-3162		WOS:000296089900008
J	Doukakis, Phaedra; Hanner, Robert; Shivji, Mahmood; Bartholomew, Cecilia; Chapman, Demian; Wong, Eugene; Amato, George						Applying genetic techniques to study remote shark fisheries in northeastern Madagascar						MITOCHONDRIAL DNA			22				15	20		10.3109/19401736.2010.526112		1	2011-10-01	2011	Background and aims. The shark fisheries of Madagascar remain largely unstudied. Remoteness makes fisheries monitoring challenging while the high value of shark fins combined with the extreme poverty in Madagascar creates intensive pressure on shark resources.Materials and methods. We use DNA barcoding and species-specific PCR assays to characterize shark fisheries in Antongil Bay in northeastern…						1			1	1940-1736		WOS:000295726100004
J	White, W. T.; Iglesias, S. P.						Squalus formosus, a new species of spurdog shark (Squaliformes: Squalidae), from the western North Pacific Ocean						JOURNAL OF FISH BIOLOGY			79	4			954	968		10.1111/j.1095-8649.2011.03068.x			2011-10-01	2011	A new species of spurdog, Squalus formosus n. sp., from the lower continental shelf and upper continental slope off the coast of Taiwan and southern Japan, is described. It belongs to the 'high-fin megalops group', the members of which share a short snout, high dorsal fins, robust dorsal spines, tricuspid denticles and a white posterior caudal margin. Squalus formosus is most similar to Squalus a…						0			0	0022-1112		WOS:000295529000007
J	Long, Douglas J.; McCosker, John E.; Blum, Shmulik; Klapfer, Avi						Tropical Eastern Pacific Records of the Prickly Shark, Echinorhinus cookei (Chondrichthyes: Echinorhinidae)						PACIFIC SCIENCE			65	4			433	440		10.2984/65.4.433			2011-10-01	2011	Most records of the prickly shark, Echinorhinus cookei Pietschmann, 1928, are from temperate and subtropical areas of the Pacific rim, with few records from the tropics. This seemingly disjunct distribution led some authors to consider E. cookei to have an antitropical distribution. Unreported museum specimens and underwater observations of E. cookei from Cocos Island, Costa Rica; the Galapagos I…						0			0	0030-8870		WOS:000295856400003
J	Selim, H. Magdi; Naquin, Brian J.						Retention of Metribuzin by Sugarcane Residue: Adsorption-Desorption and Miscible Displacement Experiments						SOIL SCIENCE			176	10			520	526		10.1097/SS.0b013e31822b3a5c			2011-10-01	2011	Assessment of herbicide retention in the soil environment is essential for minimizing their potential contamination of surface and groundwater resources. In this study, metribuzin retention characteristics by sugarcane mulch residue were quantified. Batch methods were used to quantify adsorption and desorption of metribuzin by the residue over a wide range of input concentrations and reaction tim…						0			0	0038-075X		WOS:000295623800002
J	Kazmierczak, Jozef; Kempe, Stephan; Kremer, Barbara; Lopez-Garcia, Purificacion; Moreira, David; Tavera, Rosaluz						Hydrochemistry and microbialites of the alkaline crater lake Alchichica, Mexico						FACIES			57	4			543	570		10.1007/s10347-010-0255-8			2011-10-01	2011	The structure, mineralogy, and accretion processes of the modern and subfossil cyanobacterial microbialites from the alkaline crater lake Alchichica (Puebla, Mexico) were studied, along the lake's bathymetry and hydrochemistry. The recent lowering of the lake level had exposed microbialitic carbonate mounds and crusts, which emerged up to 2 m above the water surface, while accreting cyanobacteria…						1			1	0172-9179		WOS:000295086800002
J	Gil, M.; Esteban, O.; Garcia, J. A.; Pena, L.; Cambra, M.						Resistance to Plum pox virus in plants expressing cytosolic and nuclear single-chain antibodies against the viral RNA NIb replicase						PLANT PATHOLOGY			60	5			967	976		10.1111/j.1365-3059.2011.02448.x			2011-10-01	2011	The expression of engineered single-chain variable fragments specific to the NIb RNA replicase of Plum pox virus (PPV) (scFv2A) in transgenic plants was successfully used as a strategy to interfere with viral infection. Different scFv2A fusion proteins were constructed to target those subcellular compartments, such as the cytosol, endoplasmic reticulum (ER) membrane structures and the nucleus, wh…						0			0	0032-0862		WOS:000295047200018
J	Crel, James						ONE MORE DAY Kono Michi SHARK BATTER RECORDS SHARK 021 (M Wiancko, MS Small, G Pringle)						STRAD			122	1458			119	119					2011-10-01	2011							0			0	0039-2049		WOS:000295202900071
J	Miles, Andrew J.; Wallace, B. A.; Esmann, Mikael						Correlation of structural and functional thermal stability of the integral membrane protein Na,K-ATPase						BIOCHIMICA ET BIOPHYSICA ACTA-BIOMEMBRANES			1808	10			2573	2580		10.1016/j.bbamem.2011.06.009			2011-10-01	2011	The membrane-bound cation-transporting P-type Na,K-ATPase isolated from pig kidney membranes is much more resistant towards thermal inactivation than the almost identical membrane-bound Na,K-ATPase isolated from shark rectal gland membranes. The loss of enzymatic activity is correlated well with changes in protein structure as determined using synchrotron radiation circular dichroism (SRCD) spect…						2			2	2736-05-01		WOS:000294982000028
J	Yick, J. L.; Tracey, S. R.; White, R. W. G.						Niche overlap and trophic resource partitioning of two sympatric batoids co-inhabiting an estuarine system in southeast Australia						JOURNAL OF APPLIED ICHTHYOLOGY			27	5			1272	1277		10.1111/j.1439-0426.2011.01819.x			2011-10-01	2011	Elasmobranchs play an important role within the trophic structure of marine ecosystems, but there are relatively few studies published on the feeding ecology of these species. Reported herein is the feeding ecology and trophic resource partitioning of two sympatric batoid species, Urolophus cruciatus and Narcine tasmaniensis from southeast Australia. The diet of males and females of both species …						1			1	0175-8659		WOS:000295013300023
J	Kik, M. J. L.; Janse, M.; Benz, G. W.						The sea louse Lepeophtheirus acutus (Caligidae, Siphonostomatoida, Copepoda) as a pathogen of aquarium-held elasmobranchs						JOURNAL OF FISH DISEASES			34	10			793	799		10.1111/j.1365-2761.2011.01295.x			2011-10-01	2011	Lepeophtheirus acutus Heegaard, 1943 (Caligidae, Siphonostomatoida, Copepoda), was collected from or observed on four of six elasmobranch species held at Burgers' Zoo (Arnhem, The Netherlands). Circumstantial evidence suggested that a zebra shark, Stegostoma fasciatum (Hermann), from the wild carried the infection into the facility, where copepods reproduced and colonized additional hosts. Copepo…						0			0	0140-7775		WOS:000295055200008
J	Griffiths, Andrew M.; Casane, Didier; McHugh, Matthew; Wearmouth, Victoria J.; Sims, David W.; Genner, Martin J.						Characterisation of polymorphic microsatellite loci in the small-spotted catshark (Scyliorhinus canicula L.)						CONSERVATION GENETICS RESOURCES			3	4			705	709		10.1007/s12686-011-9438-z			2011-10-01	2011	Microsatellite markers were characterised in the small-spotted catshark (Scyliorhinus canicula) from unpublished sequences generated from expressed sequence tags and bacterial artificial chromosomes. All seventeen of the loci screened were found to be polymorphic within the population of catsharks tested. The number of alleles identified varied between two and twelve per locus, and the expected h…						1			1	1877-7252		WOS:000294682100026
J	Happell, B.; Moxham, L.						Revitalising mental health in undergraduate nursing curricula: Swimming between the flags to avoid the sharks						INTERNATIONAL JOURNAL OF MENTAL HEALTH NURSING			20		SI		6	7				1	2011-10-01	2011							0			0	1445-8330		WOS:000294570400022
J	Morrison, A.; Munro, I.						In shark infested waters it is best to swim between the flags. But let's not be so dramatic! After all they do sound a siren, don't they?						INTERNATIONAL JOURNAL OF MENTAL HEALTH NURSING			20		SI		13	13				1	2011-10-01	2011							0			0	1445-8330		WOS:000294570400049
J	Gleeson, Ricky; Adlard, Robert						Morphological and genetic analysis of three new species of Ceratomyxa Th,lohan, 1892 (Myxozoa: Myxosporea) from carcharhinid sharks off Australia						SYSTEMATIC PARASITOLOGY			80	2			117	124		10.1007/s11230-011-9316-9			2011-10-01	2011	Three new species of Ceratomyxa Th,lohan, 1892 are described from the gall-bladders of two species of carcharhinid sharks collected off Heron and Lizard Islands on the Great Barrier Reef, Australia. Ceratomyxa carcharhini n. sp. and C. melanopteri n. sp. are described from Carcharhinus melanopterus (Quoy & Gaimard), and Ceratomyxa negaprioni n. sp. is described from Negaprion acutidens (Ruppell).…						1			1	0165-5752		WOS:000294756600002
J	Carter, B.; Scheib, J.; Cupp, C.						THE PHAGOCYTIC RECEPTOR JEDI SIGNALS ENGULFMENT THROUGH THE TYROSINE KINASE SYK						GLIA			59				S16	S17				1	2011-10-01	2011							0			0	0894-1491		WOS:000294178900059
J	Tomita, Taketeru; Kurihara, Ken'ichi						First record of a large lamniform shark Cretodus semiplicatus in the Pacific region, from the Mikasa Formation (Lower Cenomanian), Hokkaido, Japan						PALEONTOLOGICAL RESEARCH			15	3			181	184		10.2517/1342-8144-15.3.181			SEP 30 2011	2011							0			0	1342-8144		WOS:000297539100006
J	Zaera, Diana; Johnsen, Espen						Foetal deformities in a smooth-hound shark, Mustelus mustelus, from an oil exploited area in Angola						CYBIUM			35	3			231	236					SEP 30 2011	2011	A smooth-hound shark, Mustelus mustelus (Linnaeus, 1758) caught off northern Angola had eight normally developed foetuses and one specimen with morphological abnormalities. This is the first teratologic embryonic deformation recorded for the species, presenting large scoliotic, lordotic and kyphotic bends in the vertebral column. All tins were present but malformed, and the eyes were well develop…						0			0	0399-0974		WOS:000297966400009
J	Claes, Julien M.; Sato, Keiichi; Mallefet, Jerome						Morphology and control of photogenic structures in a rare dwarf pelagic lantern shark (Etmopterus splendidus)						JOURNAL OF EXPERIMENTAL MARINE BIOLOGY AND ECOLOGY			406	2012-01-02			1	5		10.1016/j.jembe.2011.05.033			SEP 30 2011	2011	The shark genus Etmopterus encompasses numerous deep-sea species that are widely distributed throughout the world's oceans and share the capability to emit light thanks to numerous tiny epidermal photogenic organs called photophores. Despite the potential wide ecological interest of this light emission, it is still a poorly studied aspect of shark biology, mostly due to the challenges inherent to…						1			1	0022-0981		WOS:000294105200001
J	Pradel, Alan; Tafforeau, Paul; Maisey, John G.; Janvier, Philippe						A New Paleozoic Symmoriiformes (Chondrichthyes) from the Late Carboniferous of Kansas (USA) and Cladistic Analysis of Early Chondrichthyans						PLOS ONE			6	9					e24938	10.1371/journal.pone.0024938			SEP 27 2011	2011	Background: The relationships of cartilaginous fishes are discussed in the light of well preserved three-dimensional Paleozoic specimens. There is no consensus to date on the interrelationship of Paleozoic chondrichthyans, although three main phylogenetic hypotheses exist in the current literature: 1. the Paleozoic shark-like chondrichthyans, such as the Symmoriiformes, are grouped along with the…						1			1	1932-6203		WOS:000295933700012
J	[Anonymous]						SHARK LIPID REPELS VIRUS						CHEMICAL & ENGINEERING NEWS			89	39			28	28					SEP 26 2011	2011							0			0	2347-09-01		WOS:000295391300044
J	Nuttall, M. A.; Jordaan, A.; Cerrato, R. M.; Frisk, M. G.						Identifying 120 years of decline in ecosystem structure and maturity of Great South Bay, New York using the Ecopath modelling approach						ECOLOGICAL MODELLING			222	18			3335	3345		10.1016/j.ecolmodel.2011.07.004			SEP 24 2011	2011	Mass balanced models yield valuable information regarding ecological function and delivery of ecosystem services, but often rely on data collected well before many species were reduced to fractions of their original abundance. Lagoonal systems, such as Great South Bay (GSB), NY, sit on the interface of terrestrial and marine ecosystems and are prone to anthropogenic stressors but proximity to lan…						0			0	0304-3800		WOS:000296124400003
J	Hisano, Mizue; Connolly, Sean R.; Robbins, William D.						Population Growth Rates of Reef Sharks with and without Fishing on the Great Barrier Reef: Robust Estimation with Multiple Models						PLOS ONE			6	9					e25028	10.1371/journal.pone.0025028			SEP 23 2011	2011	Overfishing of sharks is a global concern, with increasing numbers of species threatened by overfishing. For many sharks, both catch rates and underwater visual surveys have been criticized as indices of abundance. In this context, estimation of population trends using individual demographic rates provides an important alternative means of assessing population status. However, such estimates invo…						0			0	1932-6203		WOS:000295267100017
J	Graef, Russell R.; Anderson, George P.; Doyle, Katherine A.; Zabetakis, Dan; Sutton, Felicia N.; Liu, Jinny L.; Serrano-Gonzalez, Joseline; Goldman, Ellen R.; Cooper, Lynn A.						Isolation of a Highly Thermal Stable Lama Single Domain Antibody Specific for Staphylococcus aureus Enterotoxin B						BMC BIOTECHNOLOGY			11						86	10.1186/1472-6750-11-86			SEP 21 2011	2011	Background: Camelids and sharks possess a unique subclass of antibodies comprised of only heavy chains. The antigen binding fragments of these unique antibodies can be cloned and expressed as single domain antibodies (sdAbs). The ability of these small antigen-binding molecules to refold after heating to achieve their original structure, as well as their diminutive size, makes them attractive can…						0			0	1472-6750		WOS:000295873900001
J	Zasloff, Michael; Adams, A. Paige; Beckerman, Bernard; Campbell, Ann; Han, Ziying; Luijten, Erik; Meza, Isaura; Julander, Justin; Mishra, Abhijit; Qu, Wei; Taylor, John M.; Weaver, Scott C.; Wong, Gerard C. L.						Squalamine as a broad-spectrum systemic antiviral agent with therapeutic potential						PROCEEDINGS OF THE NATIONAL ACADEMY OF SCIENCES OF THE UNITED STATES OF AMERICA			108	38			15978	15983		10.1073/pnas.1108558108			SEP 20 2011	2011	Antiviral compounds that increase the resistance of host tissues represent an attractive class of therapeutic. Here, we show that squalamine, a compound previously isolated from the tissues of the dogfish shark (Squalus acanthias) and the sea lamprey (Petromyzon marinus), exhibits broad-spectrum antiviral activity against human pathogens, which were studied in vitro as well as in vivo. Both RNA-a…						3			3	0027-8424		WOS:000295030000063
J	Thomas, Daniel B.; McGoverin, Cushla M.; Fordyce, R. Ewan; Frew, Russell D.; Gordon, Keith C.						Raman spectroscopy of fossil bioapatite - A proxy for diagenetic alteration of the oxygen isotope composition						PALAEOGEOGRAPHY PALAEOCLIMATOLOGY PALAEOECOLOGY			310	2012-01-02	SI		62	70		10.1016/j.palaeo.2011.06.016			SEP 15 2011	2011	Fossil bioapatite may yield biogeochemical signals of paleoenvironments captured by living organisms. Bioapatite may be diagenetically altered, however, with ions added or removed post-mortem; such change is typically assessed using destructive and demanding techniques. Here, Raman spectroscopy is used as a rapid and non-destructive way to identify significant diagenetic alteration of fossil bioa…						2			2	0031-0182		WOS:000295608400008
J	Thomas, Freddy; Jamin, Eric; Shimoo, Katsuya; Nagao, Junji; Osaki, Yukihiko; Granier, Colin						The use of multi-element stable isotope analysis to monitor the origin of chondroitin sulfates						RAPID COMMUNICATIONS IN MASS SPECTROMETRY			25	17			2533	2537		10.1002/rcm.5159			SEP 15 2011	2011	Continuous-flow isotope ratio mass spectrometry (CF-IRMS) of deuterium, carbon, nitrogen, oxygen and sulfur has been used to analyse samples of pure chondroitin sulfates from known animal sources (shark, squid, salmon, pig and bovine). There is a need to control the origin of this dietary supplement, which is extracted from several types of animals: for traditional, ethical, or economic reasons, …						0			0	0951-4198		WOS:000294267200022
J	Raincrow, Jeremy D.; Dewar, Ken; Stocsits, Claudia; Prohaska, Sonja J.; Amemiya, Chris T.; Stadler, Peter F.; Chiu, Chi-Hua						Hox Clusters of the Bichir (Actinopterygii, Polypterus senegalus) Highlight Unique Patterns of Sequence Evolution in Gnathostome Phylogeny						JOURNAL OF EXPERIMENTAL ZOOLOGY PART B-MOLECULAR AND DEVELOPMENTAL EVOLUTION			316B	6			451	464		10.1002/jez.b.21420			SEP 15 2011	2011	Teleost fishes have extra Hox gene clusters owing to shared or lineage-specific genome duplication events in rayfinned fish (actinopterygian) phylogeny. Hence, extrapolating between genome function of teleosts and human or even between different fish species is difficult. We have sequenced and analyzed Hox gene clusters of the Senegal bichir (Polypterus senegalus), an extant representative of the…						1			1	1552-5007		WOS:000294262300008
J	Toulouse, Julien; Sharkas, Kamal; Bremond, Eric; Adamo, Carlo						Communication: Rationale for a new class of double-hybrid approximations in density-functional theory						JOURNAL OF CHEMICAL PHYSICS			135	10					101102	10.1063/1.3640019			SEP 14 2011	2011	We provide a rationale for a new class of double-hybrid approximations introduced by Bremond and Adamo [J. Chem. Phys. 135, 024106 (2011)] which combine an exchange-correlation density functional with Hartree-Fock exchange weighted by lambda and second-order Moller-Plesset (MP2) correlation weighted by lambda(3). We show that this double-hybrid model can be understood in the context of the densit…						5			5	0021-9606		WOS:000296032400002
J	Toulouse, Julien; Sharkas, Kamal; Bremond, Eric; Adamo, Carlo						Communication: rationale for a new class of double-hybrid approximations in density-functional theory.						The Journal of chemical physics			135	10			101102						2011-Sep-14	2011	We provide a rationale for a new class of double-hybrid approximations introduced by Brémond and Adamo [J. Chem. Phys. 135, 024106 (2011)] which combine an exchange-correlation density functional with Hartree-Fock exchange weighted by lambda and second-order Moller-Plesset (MP2) correlation weighted by lambda(3). We show that this double-hybrid model can be understood in the context of the densi…						0			0	1089-7690		MEDLINE:21932868
J	Son, Younggon						Influence of the Die Configuration on the Gross Melt Fracture of Linear Polyethylene						JOURNAL OF APPLIED POLYMER SCIENCE			121	5			2812	2817		10.1002/app.33836			SEP 5 2011	2011	In this study, capillary extrusion experiments and rupture visualization experiments were carried out with a combined die configuration where two different dies were attached in a capillary rheometer. We observed that the gross melt fracture (GMF) and rupture of the melt occurred simultaneously when the diameter of the die located at the upstream position was larger than that of the die located d…						0			0	0021-8995		WOS:000291598100040
J	Altarriba, Jeanette; Basnight-Brown, Dana M.						The representation of emotion vs. emotion-laden words in English and Spanish in the Affective Simon Task						INTERNATIONAL JOURNAL OF BILINGUALISM			15	3			310	328		10.1177/1367006910379261			2011-09-01	2011	An Affective Simon Task was administered to English-speaking monolinguals and Spanish-English bilinguals, in order to assess the extent to which valence and emotionality are automatically processed when reading a word. Participants classified words in white on the basis of valence (positive or negative), or classified them on the basis of color (blue or green) via a key press. Words were either e…						1			1	1367-0069		WOS:000300150700004
J	Badenhorst, Shaw; Sinclair, Paul; Ekblom, Anneli; Plug, Ina						Faunal remains from Chibuene, an Iron Age coastal trading station in central Mozambique						SOUTHERN AFRICAN HUMANITIES			23				1	15					2011-09-01	2011	We report on the small faunal assemblage from the Iron Age coastal trading station of Chibuene, situated on the coastal littoral of central Mozambique. The faunal assemblage was excavated in 1995 and contains bones from a variety of animals, including livestock, chickens, wild game animals, as well as aquatic species such as turtles and fish. Fish, turtle and shark remains dominate the assemblage…						0			0	1681-5564		WOS:000299392200001
J	Curtis, Tobey H.; Macesic, Laura J.						OBSERVATIONS OF BREACHING BEHAVIOR IN JUVENILE BULL SHARKS, CARCHARHINUS LEUCAS						Florida Scientist			74	4			253	257					FAL 2011	2011	Breaching is a behavior observed in numerous marine vertebrate species, and is typically associated with feeding, predator avoidance, parasite removal, or signaling. Few shark species have been documented to display natural breaching behavior unassociated with hook and line capture. We describe observations of breaching by juvenile bull sharks, Carcharhinus leucas. in the Indian River Lagoon. Flo…						0			0	0098-4590		BCI:BCI201200120962
J	Gallagher, A. J.; Jackson, T.; Hammerschlag, N.						OCCURRENCE OF TIGER SHARK (GALEOCERDO CUVIER) SCAVENGING ON AVIAN PREY AND ITS POSSIBLE CONNECTION TO LARGE-SCALE BIRD DIE-OFFS IN THE FLORIDA KEYS						Florida Scientist			74	4			264	269					FAL 2011	2011	The tiger shark, Galeocerdo cuvier, is the largest predatory fish in tropical waters. Due to its wide-ranging movements, diverse diet and perceived potential threat to humans, the feeding behavior of this species has received significant attention in the scientific: literature for over 40 years. Such studies have identified various prey items and feeding strategies for tiger sharks worldwide, and…						0			0	0098-4590		BCI:BCI201200120964
J	Bircan-Yildirim, Yasemin; Cek, Sehriban; Basusta, Nuri; Atik, Esin						Histology and Morphology of The Epigonal Organ with Special Referance to the Lymphomyeloid System in Rhinobatos rhinobatos						TURKISH JOURNAL OF FISHERIES AND AQUATIC SCIENCES			11	3			351	358		10.4194/1303-2712-v11_3_03			2011-09-01	2011	The present study is the first trial to describe the structure of the lymphomyeloid epigonal organ of the Rhinobatos rhinobatos. The morphological structure of the epigonal organ was similar in males and females and it was classified as stingray type. This organ possessed erythrocytes, thrombocytes, lymphocytes and two distinct types of granulocyts (eosinophils and neutrophils). Basophils were no…						0			0	1303-2712		WOS:000298836100003
J	Comerford, Sean						Perspective on Sharks						AMERICAN SCHOLAR			80	4			4	6					FAL 2011	2011							0			0	0003-0937		WOS:000297661100008
J	Sasaki, Takuji						Bringing photosynthesis research back to light						BREEDING SCIENCE			61	3			223	223		10.1270/jsbbs.61.223			2011-09-01	2011							0			0	1344-7610		WOS:000296683100001
J	Carretta, James V.; Barlow, Jay						Long-Term Effectiveness, Failure Rates, and "Dinner Bell" Properties of Acoustic Pingers in a Gillnet Fishery						MARINE TECHNOLOGY SOCIETY JOURNAL			45	5			7	19					SEP-OCT 2011	2011	The long-term effectiveness of acoustic pingers in reducing marine mammal bycatch was assessed for the swordfish and thresher shark drift gillnet fishery in California. Between 1990 and 2009, data on fishing gear, environmental variables, and bycatch were recorded for over 8,000 fishing sets by at-sea fishery observers, including over 4,000 sets outfitted with acoustic pingers between 1996 and 20…						0			0	0025-3324		WOS:000296948200002
J	Carpenter, David; Falcon-Lang, Howard J.; Benton, Michael J.; Nelson, W. John						FISHES AND TETRAPODS IN THE UPPER PENNSYLVANIAN (KASIMOVIAN) COHN COAL MEMBER OF THE MATTOON FORMATION OF ILLINOIS, UNITED STATES: SYSTEMATICS, PALEOECOLOGY, AND PALEOENVIRONMENTS						PALAIOS			26	2012-09-10			639	657		10.2110/palo.2010.p10-121r			SEP-OCT 2011	2011	A newly discovered vertebrate assemblage is reported from the Upper Pennsylvanian (mid- to upper Kasimovian) Cohn Coal Member of the Mattoon Formation of southeast Illinois, United States. Teeth, scales, and spines of xenacanth (Dicentrodus, Orthacanthus, Triodus, Xenacanthus) and euselachian (Sphenacanthus) sharks dominate the assemblage. Less common are the teeth, scales, and centra of holoceph…						0			0	0883-1351		WOS:000296043000011
J	Graham, Jocelyn E.; Forbes, Laura E.; Berglund, Casey; Morgadinho, Joao; Field, Catherine J.; Bell, Rhonda C.		Apron Team				Fish Consumption Prior and during Pregnancy of Women in Alberta						JOURNAL OF DEVELOPMENTAL ORIGINS OF HEALTH AND DISEASE			2				S120	S120				1	2011-09-01	2011							0			0	2040-1744		WOS:000296168500406
J	Curtis, Tobey H.; Adams, Douglas H.; Burgess, George H.						Seasonal Distribution and Habitat Associations of Bull Sharks in the Indian River Lagoon, Florida: A 30-Year Synthesis						TRANSACTIONS OF THE AMERICAN FISHERIES SOCIETY			140	5			1213	1226		10.1080/00028487.2011.618352			2011-09-01	2011	Many coastal shark species use shallow estuarine regions as nursery habitat, but there are considerable gaps in our understanding of the seasonal distribution and habitat use patterns of sharks within these systems. We compiled all available sampling data from the Indian River Lagoon (IRL) along Florida's central Atlantic coast to examine the distribution of bull sharks Carcharhinus leucas. The d…						0			1	8487-02-01		WOS:000296143900007
J	Schwartz, Frank J.						LONG TERM LONG-LINE SHARK CATCHES: VARIATIONS BY SITE AND TIDAL STAGE						Journal of the North Carolina Academy of Science			127	3			214	215					FAL 2011	2011	Long term long-line shark catch variations (38 yr) at two Onslow Bay, North Carolina sites were examined for differences in catches by sites and tidal stages. Catches were highly significantly different between sites. Catches by tidal stage were not significantly different at each site.						0			0	0013-6220		BCI:BCI201100691526
J	Cutmore, Scott C.; Theiss, Susan M.; Bennett, Michael B.; Cribb, Thomas H.						Hemipristicola gunterae gen. n., sp n. (Cestoda: Tetraphyllidea: Phyllobothriidae) from the snaggletooth shark, Hemipristis elongata (Carcharhiniformes: Hemigaleidae), from Moreton Bay, Australia						FOLIA PARASITOLOGICA			58	3			187	196					2011-09-01	2011	Helminthological examination of the snaggletooth shark, Hemipristis elongata (Klunzinger) (Carcharhiniformes: Hemigaleidae), from Moreton Bay, Queensland, Australia, yielded a phyllobothriid genus and species previously unknown to science. Hemipristicola gunterae gen. n., sp. n. is described here, and is placed in the subfamily Phyllobothriinae Braun, 1900. Of the other phyllobothriid genera, the…						0			0	0015-5683		WOS:000295863000003
J	Goodchild, Sarah A.; Dooley, Helen; Schoepp, Randal J.; Flajnik, Martin; Lonsdale, Stephen G.						Isolation and characterisation of Ebolavirus-specific recombinant antibody fragments from murine and shark immune libraries						MOLECULAR IMMUNOLOGY			48	15-16			2027	2037		10.1016/j.molimm.2011.06.437			2011-09-01	2011	Members of the genus Ebolavirus cause fulminating outbreaks of disease in human and non-human primate populations with a mortality rate up to 90%. To facilitate rapid detection of these pathogens in clinical and environmental samples, robust reagents capable of providing sensitive and specific detection are required. In this work recombinant antibody libraries were generated from murine (single c…						0			0	0161-5890		WOS:000295395300035
J	Dessimoz, Christophe; Zoller, Stefan; Manousaki, Tereza; Qiu, Huan; Meyer, Axel; Kuraku, Shigehiro						Comparative genomics approach to detecting split-coding regions in a low-coverage genome: lessons from the chimaera Callorhinchus milii (Holocephali, Chondrichthyes)						BRIEFINGS IN BIOINFORMATICS			12	5	SI		474	484		10.1093/bib/bbr038			2011-09-01	2011	Recent development of deep sequencing technologies has facilitated de novo genome sequencing projects, now conducted even by individual laboratories. However, this will yield more and more genome sequences that are not well assembled, and will hinder thorough annotation when no closely related reference genome is available. One of the challenging issues is the identification of protein-coding seq…						0			0	1467-5463		WOS:000295171700012
J	Rodriguez-Diaz, Julio C.; Kurozawa, Louise E.; Netto, Flavia M.; Hubinger, Miriam D.						Optimization of the Enzymatic Hydrolysis of Blue Shark Skin						JOURNAL OF FOOD SCIENCE			76	7			C938	C949		10.1111/j.1750-3841.2011.02318.x			2011-09-01	2011	Enzymatic hydrolysis of Blue shark skin using Protamex (TM) was evaluated seeking optimal process conditions. The influence of temperature (45 to 65 degrees C), pH (6.8 to 8), and enzyme/substrate ratio (E/S; 1% to 5%) on the responses of degree of hydrolysis and protein recovery were determined and process optimization was performed looking for maximum value of the responses. Optimum conditions …						0			0	0022-1147		WOS:000295076000016
J	Soma, Hiroaki; Murai, Noriko; Tanaka, Kayoko; Kokuba, Hiroko; Fujita, Koji; Toda, Minoru; Uchida, Senzo; Mineo, Shoichiro						A COMPARATIVE STUDY ON PLACENTATION IN THE SCALLOPED HAMMERHEAD SHARK, SPHYRNA LEWINI AND THE MANTA RAY, MANTA BIROSTRIS						PLACENTA			32	9			A104	A104					2011-09-01	2011			Meeting of the International-Federation-of-Placenta-Associations (IFPA)	SEP 14-17, 2011	Int Federat Placenta Assoc	Geilo, NORWAY	0			0	0143-4004		WOS:000295072200235
J	Reddy, Shravanthi T.; Chung, Kenneth K.; McDaniel, Clinton J.; Darouiche, Rabih O.; Landman, Jaime; Brennan, Anthony B.						Micropatterned Surfaces for Reducing the Risk of Catheter-Associated Urinary Tract Infection: An In Vitro Study on the Effect of Sharklet Micropatterned Surfaces to Inhibit Bacterial Colonization and Migration of Uropathogenic Escherichia coli						JOURNAL OF ENDOUROLOGY			25	9			1547	1552		10.1089/end.2010.0611			2011-09-01	2011	Background and Purpose: Catheter-associated urinary tract infection (CAUTI) is the most common device-associated infection and can result in serious medical consequences. We studied the efficacy of a novel microscopic physical surface modification (Sharklet) for preventing bacterial colonization and migration of uropathogenic Escherichia coli on silicone elastomer.Materials and Methods: In vitro …						1			1	0892-7790		WOS:000294819100026
J	Laxson, Carrie J.; Condon, Nicole E.; Drazen, Jeffrey C.; Yancey, Paul H.						Decreasing Urea: Trimethylamine N-Oxide Ratios with Depth in Chondrichthyes: A Physiological Depth Limit?						PHYSIOLOGICAL AND BIOCHEMICAL ZOOLOGY			84	5			494	505		10.1086/661774			SEP-OCT 2011	2011	In marine osmoconformers, cells use organic osmolytes to maintain osmotic balance with seawater. High levels of urea are utilized in chondrichthyans (sharks, rays, skates, and chimaeras) for this purpose. Because of urea's perturbing nature, cells also accumulate counteracting methylamines, such as trimethylamine N-oxide (TMAO), at about a 2 : 1 urea : methylamine ratio, the most thermodynamicall…						0			0	1522-2152		WOS:000295038000005
J	Mejia-Falla, P. A.; Navia, A. F.						Relationship between body size and geographic range size of elasmobranchs from the Tropical Eastern Pacific: An initial approximation for their conservation						CIENCIAS MARINAS			37	3			305	321					2011-09-01	2011	This study evaluated the relationship between body size and geographic range size, measured as extent and volume of occurrence of resident and endemic elasmobranchs of the Tropical Eastern Pacific. Data of body size, minimum and maximum depths, and latitudinal distribution of the species were obtained from the literature. Extent and volume of occurrence were measured from 3080.25-km(2) quadrants,…						0			0	0185-3880		WOS:000294934400006
J	Reilly, Beau D.; Cramp, Rebecca L.; Wilson, Jonathan M.; Campbell, Hamish A.; Franklin, Craig E.						Branchial osmoregulation in the euryhaline bull shark, Carcharhinus leucas: a molecular analysis of ion transporters						JOURNAL OF EXPERIMENTAL BIOLOGY			214	17			2883	2895		10.1242/jeb.058156			2011-09-01	2011	Bull sharks, Carcharhinus leucas, are one of only a few species of elasmobranchs that live in both marine and freshwater environments. Osmoregulation in euryhaline elasmobranchs is achieved through the control and integration of various organs (kidney, rectal gland and liver) in response to changes in environmental salinity. However, little is known regarding the mechanisms of ion transport in th…						0			0	0022-0949		WOS:000293736200016
J	Dewailly, E.; Rouja, P.; Schultz, E.; Julien, P.; Tucker, T.						Vitamin A Intoxication from Reef Fish Liver Consumption in Bermuda						JOURNAL OF FOOD PROTECTION			74	9			1581	1583		10.4315/0362-028X.JFP-10-566			2011-09-01	2011	We report three historical cases of severe vitamin A intoxication in anglers who had consumed reef fish liver caught in Bermuda. The subsequent analyses of 35 fish livers from seven different fish species revealed that very high concentrations of vitamin A exist in tropical fish liver, even in noncarnivorous fish species. Large variations in concentrations were observed between specimens and betw…						0			0	0362-028X		WOS:000294750700025
J	Zaccone, Daniele; Lo Cascio, Patrizia; Lauriano, Rita; Pergolizzi, Simona; Sfacteria, Alessandra; Marino, Fabio						Occurrence of neuropeptides and tyrosine hydroxylase in the olfactory epithelium of the lesser-spotted catshark (Scyliorhinus canicula Linnaeus, 1758)						ACTA HISTOCHEMICA			113	7			717	722		10.1016/j.acthis.2010.09.010			2011	2011	Immunohistochemical studies using antisera against various neuropeptides (Substance P, vasoactive intestinal polypeptide, and cholecystokinin octapeptide) and tyrosine hydroxylase revealed both olfactory sensory neuron (OSN) polymorphisms and transepithelial-subepithelial nerves in the olfactory epithelium of the cartilaginous fish, Scyliorhinus canicula. This study provides the first evidence of…						1			1	0065-1281		WOS:000294581200005
J	Iagher, Fabiola; de Brito Belo, Sergio Ricardo; Naliwaiko, Katya; Franzoi, Andressa Machado; Pereira de Brito, Gleisson Alisson; Yamazaki, Ricardo Key; Muritiba, Ana Lucia; Muehlmann, Luis Alexandre; Steffani, Jovani Antonio; Fernandes, Luiz Claudio						Chronic Supplementation With Shark Liver Oil for Reducing Tumor Growth and Cachexia in Walker 256 Tumor-Bearing Rats						NUTRITION AND CANCER-AN INTERNATIONAL JOURNAL			63	8			1307	1315		10.1080/01635581.2011.607540			2011	2011	We investigated the effect of chronic supplementation with shark liver oil (SLO), an antitumor supplement source of n-3 fatty acids and 1-O-alkylglycerols, alone and combined with coconut fat (CF), a source of saturated fatty acids, on Walker 256 tumor growth and cachexia. Male rats were supplemented daily and orally with SLO and/or CF (1 g per kg body weight) for 7 wk. After 7 wk, 50% of animals…						0			0	0163-5581		WOS:000299396600017
J	Mourato, B. L.; Coelho, R.; Amorim, A. F.; Carvalho, F. C.; Hazin, F. H. V.; Burgess, G.						Size at maturity and length-weight relationships of the blurred lantern shark Etmopterus bigelowi (Squaliformes: Etmopteridae) caught off southeastern Brazil						CIENCIAS MARINAS			36	4			323	331					2010-12-01	2010	The blurred lantern shark Etmopterus bigelowi, a deep-water squaloid shark, is globally widespread in temperate and tropical waters, but there is little available information about its biology owing to its relative rarity of capture and taxonomic confusion with its sibling species Etmopterus pusillus. Specimens used in this study were collected from July to December 2004 as by-catch in the commer…						0			0	0185-3880		WOS:000285494300001
J	Mendonca, F. F.; Hashimoto, D. T.; De-Franco, B.; Porto-Foresti, F.; Gadig, O. B. F.; Oliveira, C.; Foresti, F.						Genetic identification of lamniform and carcharhiniform sharks using multiplex-PCR						CONSERVATION GENETICS RESOURCES			2	1			31	35		10.1007/s12686-009-9131-7			2010-12-01	2010	Nowadays, because of the constant increase in the capture and trade of sharks all over the world and reports of several species already showing important signs of over-exploitation, the establishment of registration mechanisms, evaluation and fishery control become urgent. Morphological identification of captured sharks is very difficult, and sometimes impossible, due to the removal of the animal…						2			2	1877-7252		WOS:000290409000007
J	Feldheim, Kevin A.; Chapman, Demian D.; Simpfendorfer, Colin A.; Richards, Vincent P.; Shivji, Mahmood S.; Wiley, Tonya R.; Poulakis, Gregg R.; Carlson, John K.; Eng, Rowena; Sagarese, Skyler						Genetic tools to support the conservation of the endangered smalltooth sawfish, Pristis pectinata						CONSERVATION GENETICS RESOURCES			2	1			105	113		10.1007/s12686-010-9175-8			2010-12-01	2010	The smalltooth sawfish, Pristis pectinata, is protected under the US Endangered Species Act (ESA) and all forms of international trade of this species are prohibited under Appendix I of the Convention on International Trade in Endangered Species of Flora and Fauna (CITES). Although it is illegal to land or trade P. pectinata within the US or across its borders, it is difficult to enforce these re…						3			3	1877-7252		WOS:000290409000024
J	Wcisel, Michelle; Chivell, Wilfred; Gottfried, Michael D.						A potential predation attempt by a great white shark on an Indo-Pacific humpback dolphin						SOUTH AFRICAN JOURNAL OF WILDLIFE RESEARCH			40	2			184	187					2010-10-01	2010	A live Indo-Pacific humpback dolphin (Sousa chinensis) with two bite wounds resulting from a great white shark (Carcharodon carcharias) encounter was observed from the commercial whale-watching vessel, Whale Whisperer, in Gansbaai on 23 and 24 August 2006. The most severe wound was to the dolphin's left flank area, the other to the anterior portion of its dorsal 'hump'. This is the first document…						0			0	0379-4369		WOS:000291012100012
J	Jones, Ashlee A.; Hall, Norman G.; Potter, Ian C.						Species compositions of elasmobranchs caught by three different commercial fishing methods off southwestern Australia, and biological data for four abundant bycatch species						FISHERY BULLETIN			108	4			365	381					2010-10-01	2010	Commercial catches taken in southwestern Australian waters by trawl fisheries targeting prawns and scallops and from gillnet and longline fisheries targeting sharks were sampled at different times of the year between 2002 and 2008. This sampling yielded 33 elasmobranch species representing 17 families. Multivariate statistics elucidated the ways in which the species compositions of elasmobranchs …						2			2	0090-0656		WOS:000283953000001
J	Brunnschweiler, J. M.; Queiroz, N.; Sims, D. W.						Oceans apart? Short-term movements and behaviour of adult bull sharks Carcharhinus leucas in Atlantic and Pacific Oceans determined from pop-off satellite archival tagging						JOURNAL OF FISH BIOLOGY			77	6			1343	1358		10.1111/j.1095-8649.2010.02757.x			2010-10-01	2010	Adult bull sharks Carcharhinus leucas were monitored with electronic tags to investigate horizontal and vertical movements in the Atlantic and Pacific Oceans. In both locations, C. leucas showed some fidelity to specific coastal areas with only limited horizontal movements away from the tagging sites after tag attachment. Fish tagged in the Bahamas were detected mostly in the upper 20 m of the wa…						4			4	0022-1112		WOS:000282875100011
J	Pinhal, Danillo; Gadig, Otto B. F.; Martins, Cesar						Genetic identification of the sharks Rhizoprionodon porosus and R. lalandii by PCR-RFLP and nucleotide sequence analyses of 5S rDNA						CONSERVATION GENETICS RESOURCES			1	1			35	38		10.1007/s12686-009-9008-9			2009-12-01	2009	A molecular approach based on nuclear 5S rDNA sequence variability was applied successfully to correctly identify samples from the two Rhizoprionodon species collected in the wild or sold in markets. The sequence of the non-transcribed spacer (NTS) of the 5S rDNA showed high interspecific variability and no intra-specific polymorphism, making it a useful marker for sharpnose shark identification.…						2			2	1877-7252		WOS:000207922400009
J	Schumacher, James F.; Wilson, Leslie H.; Carman, Michelle L.; Callow, Maureen E.; Brennan, Anthony B.						POLY 693-Engineered surface designs for biofouling prevention						ABSTRACTS OF PAPERS OF THE AMERICAN CHEMICAL SOCIETY			232			693-POLY							SEP 10 2006	2006							0			0	0065-7727		WOS:000207781701323
J	Marquez-Farias, J. F.						Assessment of the impact of gillnets on the population structure of the shovelnose guitarfish Rhinobatos productus from the Gulf of California, Mexico						CIENCIAS MARINAS			37	3			293	304					2011-09-01	2011	The shovelnose guitarfish Rhinobatos productus is the most abundant species in the artisanal ray fishery of the Gulf of California. This ray is captured when it approaches the coast for reproductive purposes and is highly vulnerable to gillnets used in the fishery. Despite the high production of elasmobranchs in the Gulf of California, studies on reproductive and technological aspects are scarce.…						0			0	0185-3880		WOS:000294934400005
J	Cuevas-Zimbron, Elizabeth; Carlos Perez-Jimenez, Juan; Mendez-Loeza, Ivan						Spatial and seasonal variation in a target fishery for spotted eagle ray Aetobatus narinari in the southern Gulf of Mexico						FISHERIES SCIENCE			77	5			723	730		10.1007/s12562-011-0389-9			2011-09-01	2011	The target fishery for the spotted eagle ray Aetobatus narinari in the southern Gulf of Mexico is little known. The landings of four small-scale vessels at two fishing localities were sampled and fishermen were interviewed in 2009. Rays landed at Campeche [mean +/- A standard deviation (SD) 1204 +/- A 225.3 mm disc width (DW)], fished at 30-50 km from the shore, were larger than rays landed at Se…						0			0	0919-9268		WOS:000294728900003
J	Harr, Kendal E.						Monsters and dragons and sharks - oh my!						VETERINARY CLINICAL PATHOLOGY			40	3			277	278		10.1111/j.1939-165X.2011.00351.x			2011-09-01	2011							0			0	0275-6382		WOS:000294871500001
J	Otway, Nicholas M.; Ellis, Megan T.; Starr, Rod						Serum biochemical reference intervals for wild dwarf ornate wobbegong sharks (Orectolobus ornatus)						VETERINARY CLINICAL PATHOLOGY			40	3			361	367		10.1111/j.1939-165X.2011.00330.x			2011-09-01	2011	Background: Sharks are important to sport and commercial fishing, public aquaria, and research institutions. However, serum biochemical reference values have been established for few species.Objective: The aim of this study was to establish serum biochemical reference intervals for wild-caught dwarf ornate wobbegong sharks (Orectolobus ornatus).Methods: Fifty wobbegongs were caught, and their hea…						1			1	0275-6382		WOS:000294871500013
J	Bruns, H. Arnold						Planting Date, Rate, and Twin-Row vs. Single-Row Soybean in the Mid-South						AGRONOMY JOURNAL			103	5			1308	1313		10.2134/agronj2011.0076			SEP-OCT 2011	2011	Comparisons were made of single-row vs. twin-row soybean [Glycine max (L.) Merr.] production on a Beulah fine sandy loam (coarse-loamy, mixed, active, thermic Typic Dystrudepts) (BFSL) and Sharkey clay (very-fine, smectitic, thermic Chromic Epiaquerts) (SC) in 2009 and 2010 at Stoneville, MS. Seeding rates of 20, 30, 40, and 50 seed m(-2) were planted on beds in 102 cm single rows or 25 cm twin r…						0			0	1962-02-01		WOS:000294483400002
J	Roberts, Jennifer L.						Failure to Deliver: Watson and the Shark and the Boston Tea Party						ART HISTORY			34	4	SI		674	695		10.1111/j.1467-8365.2010.00841.x			2011-09-01	2011							0			0	0141-6790		WOS:000294260500003
J	Buettner, Claudia C.; Schulz, Uwe						Shark skin inspired riblet structures as aerodynamically optimized high temperature coatings for blades of aeroengines						SMART MATERIALS & STRUCTURES			20	9	SI				94016	10.1088/0964-1726/20/9/094016			2011-09-01	2011	This paper deals with different structuring methods for high temperature resistant nickel alloys. The ideal structured surface for a possible application on the blades of aeroengines combines high oxidation resistance with low drag in a hot gas flow. The effect of drag reduction due to riblet structured surfaces was originally inspired by shark scales, which have a drag reducing riblet structure.…		3rd Annual Meeting of the ASME/AIAA Smart Materials, Adaptive Structures, and Intelligent Systems Conference	SEP 28-OCT 01, 2010	ASME, Nanotechnol Inst; AIAA	Philadelphia, PA	1			1	0964-1726		WOS:000294773100017
J	Serra-Pereira, Barbara; Afonso, Fernando; Farias, Ines; Joyce, Pedro; Ellis (nee Storrie), Megan; Figueiredo, Ivone; Gordo, Leonel Serrano						The development of the oviducal gland in the Rajid thornback ray, Raja clavata						HELGOLAND MARINE RESEARCH			65	3			399	411		10.1007/s10152-010-0232-1			2011-09-01	2011	The reproductive processes of chondrichthyans are complex. Knowledge of the development and maturation of the oviducal gland is vital for understanding the reproductive biology of a species. This study represents the first contribution of this subject for skates. In the oviparous thornback ray, Raja clavata, oviducal gland development begins early in the developing stage with the formation of gla…						1			1	1438-387X		WOS:000293980700012
J	Fitzpatrick, Richard; Abrantes, Katya G.; Seymour, Jamie; Barnett, Adam						Variation in depth of whitetip reef sharks: does provisioning ecotourism change their behaviour?						CORAL REEFS			30	3			569	577		10.1007/s00338-011-0769-8			2011-09-01	2011	In the dive tourism industry, shark provisioning has become increasingly popular in many places around the world. It is therefore important to determine the impacts that provisioning may have on shark behaviour. In this study, eight adult whitetip reef sharks Triaenodon obesus were tagged with time-depth recorders at Osprey Reef in the Coral Sea, Australia. Tags collected time and depth data ever…						2			2	0722-4028		WOS:000293536600002
J	Berelson, W. M.; Corsetti, F. A.; Pepe-Ranney, C.; Hammond, D. E.; Beaumont, W.; Spear, J. R.						Hot spring siliceous stromatolites from Yellowstone National Park: assessing growth rate and laminae formation						GEOBIOLOGY			9	5			411	424		10.1111/j.1472-4669.2011.00288.x			2011-09-01	2011	Stromatolites are commonly interpreted as evidence of ancient microbial life, yet stromatolite morphogenesis is poorly understood. We apply radiometric tracer and dating techniques, molecular analyses and growth experiments to investigate siliceous stromatolite morphogenesis in Obsidian Pool Prime (OPP), a hot spring in Yellow-stone National Park. We examine rates of stromatolite growth and the e…						1			1	1472-4677		WOS:000294172100003
J	Little, L. Richard; Wayte, Sally E.; Tuck, Geoffrey N.; Smith, Anthony D. M.; Klaer, Neil; Haddon, Malcolm; Punt, Andre E.; Thomson, Robin; Day, Jemery; Fuller, Mike						Development and evaluation of a cpue-based harvest control rule for the southern and eastern scalefish and shark fishery of Australia						ICES JOURNAL OF MARINE SCIENCE			68	8			1699	1705		10.1093/icesjms/fsr019			2011-09-01	2011	Many fishery management agencies are adopting harvest control rules (HCRs) to achieve harvest policies and management objectives. HCRs, however, often require data-intensive stock assessments to facilitate the harvest prescription. An HCR based on catch and catch per unit effort (cpue) was developed for the southern and eastern scalefish and shark fishery of Australia, for stocks that lack the da…						2			2	1054-3139		WOS:000294075400015
J	Ellis, J. R.; Morrissey, J. F.						A tribute to Kazunari Yano (1956-2006)						JOURNAL OF THE MARINE BIOLOGICAL ASSOCIATION OF THE UNITED KINGDOM			91	6	SI		1145	1148		10.1017/S0025315411000531			2011-09-01	2011							0			0	0025-3154		WOS:000294079400001
J	Perez, Colleena R.; Cailliet, Gregor M.; Ebert, David A.						Age and growth of the sandpaper skate, Bathyraja kincaidii, using vertebral centra, with an investigation of caudal thorns						JOURNAL OF THE MARINE BIOLOGICAL ASSOCIATION OF THE UNITED KINGDOM			91	6	SI		1149	1156		10.1017/S0025315410002031			2011-09-01	2011	The sandpaper skate, Bathyraja Kincaidii, is one of four skate species commonly taken in trawl fisheries off central California although very little is known about its life history. In this study, age and growth were evaluated from 187 vertebrae using a common growth band counting method. An attempt to use marginal increment analysis and centrum edge analysis failed to validate the annual periodi…						0			0	0025-3154		WOS:000294079400002
J	Kyne, Peter M.; Courtney, Anthony J.; Bennett, Michael B.						Observations on the reproductive biology of three catsharks (Carcharhiniformes: Scyliorhinidae: Asymbolus and Figaro) from the continental shelf of southern Queensland, Australia						JOURNAL OF THE MARINE BIOLOGICAL ASSOCIATION OF THE UNITED KINGDOM			91	6	SI		1157	1164		10.1017/S0025315410001670			2011-09-01	2011	Three species of Australian endemic catsharks (grey spotted catshark Asymbolus analis, orange spotted catshark A. rubiginosus and Australian sawtail shark Figaro boardmani) were collected from the trawl grounds of a highly seasonal commercial fishery off southern Queensland, Australia. Specimens were collected on the mid to outer continental shelf at depths between 78 and 168 m. This study provid…						0			0	0025-3154		WOS:000294079400003
J	Perier, Raquel; Estalles, Marilu; Coller, Marina; Di Giacomo, Edgardo E.						Reproductive biology of the endemic skate Psammobatis lentiginosa in the San Matias Gulf (south-western Atlantic)						JOURNAL OF THE MARINE BIOLOGICAL ASSOCIATION OF THE UNITED KINGDOM			91	6	SI		1165	1173		10.1017/S0025315410001347			2011-09-01	2011	The reproductive biology of Psammobatis lentiginosa was studied in San Matias Gulf (Patagonia, south-west Atlantic). A total of 1 033 skates was analysed, total length ranged from 17 to 52 cm for females and from 13 to 55 cm for males. Total length - total weights relationships differed between sexes, with TW = 0.005 x TL3.02 for females and TW = 0.005 x TL2.97 for males. The overall sex-ratio wa…						0			0	0025-3154		WOS:000294079400004
J	Barbini, Santiago A.; Lucifora, Luis O.						Feeding habits of the Rio skate, Rioraja agassizi (Chondrichthyes: Rajidae), from off Uruguay and north Argentina						JOURNAL OF THE MARINE BIOLOGICAL ASSOCIATION OF THE UNITED KINGDOM			91	6	SI		1175	1184		10.1017/S0025315410001529			2011-09-01	2011	The feeding habits of the Rio skate, Rioraja agassizi, from off Uruguay and north Argentina were evaluated using a multiple-hypothesis modelling approach. Relationships between number of preys and sex, maturity stage, body size, season and region were assessed by building generalized linear models. Rioraja agassizi fed mainly upon crustaceans (shrimps, crabs and amphipods) and teleosts, but also …						2			2	0025-3154		WOS:000294079400005
J	Santander-Neto, Jones; Shinozaki-Mendes, Renata A.; Silveira, Leonardo M.; Juca-Queiroz, Bruno; Furtado-Neto, Manuel A. A.; Faria, Vicente V.						Population structure of nurse sharks, Ginglymostoma cirratum (Orectolobiformes), caught off Ceara State, Brazil, south-western Equatorial Atlantic						JOURNAL OF THE MARINE BIOLOGICAL ASSOCIATION OF THE UNITED KINGDOM			91	6	SI		1193	1196		10.1017/S0025315410001293			2011-09-01	2011	The nurse shark, Ginglymostoma cirratum, is considered an endangered species in Brazil and its capture by fisheries forbidden. Despite such legislation, nurse sharks continue to be caught as these laws are unenforced and fisheries are not monitored. The goal of the present study was to describe the population structure of nurse sharks caught off Ceara State, north-eastern Brazil, based on the fol…						0			0	0025-3154		WOS:000294079400007
J	Carruthers, Erin H.; Neis, Barbara						Bycatch mitigation in context: Using qualitative interview data to improve assessment and mitigation in a data-rich fishery						BIOLOGICAL CONSERVATION			144	9			2289	2299		10.1016/j.biocon.2011.06.007			2011-09-01	2011	Bycatch from pelagic longline fisheries has contributed to widespread population declines of turtles, sharks and other pelagic fishes. While large-scale estimates are needed to understand cumulative impacts on these highly migratory species, detailed information on targeting, setting, and discarding practices is needed to develop bycatch mitigation approaches. Data from qualitative fishers' knowl…						0			0	3207-06-01		WOS:000294030900020
J	Alarcon, Carolina; Cubillos, Luis A.; Acuna, Enzo						Length-based growth, maturity and natural mortality of the cockfish Callorhinchus callorhynchus (Linnaeus, 1758) off Coquimbo, Chile						ENVIRONMENTAL BIOLOGY OF FISHES			92	1			65	78		10.1007/s10641-011-9816-0			2011-09-01	2011	The growth rate, reproductive aspects, and natural mortality of chimaeras and ratfish are poorly known. In this study, life-history parameters for cockfish Callorhinchus callorhynchus (Holocephali-Callorhinchidae) are estimated, which is an important fish resource exploited in Chile. Specimens were sampled from the artisanal fishery captures, from November 2006 to November 2007. The standard leng…						0			0	0378-1909		WOS:000293958000006
J	Zhu, Catherine; Feng, Wendy; Weedon, Jeremy; Hua, Pauline; Stefanov, Dimitre; Ohta, Yuko; Flajnik, Martin F.; Hsu, Ellen						The Multiple Shark Ig H Chain Genes Rearrange and Hypermutate Autonomously						JOURNAL OF IMMUNOLOGY			187	5			2492	2501		10.4049/jimmunol.1101671			SEP 1 2011	2011	Sharks and skates are representatives of the earliest vertebrates with an immune system based on V(D) J rearrangement. They possess a unique Ig gene organization consisting of 15 to >50 individual IgM loci, each with one VH, two DH, one JH, and one set of constant region exons. The present study attempts to understand how multiple Ig genes are regulated with respect to rearrangement initiation an…						0			0	0022-1767		WOS:000294059500053
J	Huang, Rongrong; Pomin, Vitor H.; Sharp, Joshua S.						LC-MS (n) Analysis of Isomeric Chondroitin Sulfate Oligosaccharides Using a Chemical Derivatization Strategy						JOURNAL OF THE AMERICAN SOCIETY FOR MASS SPECTROMETRY			22	9			1577	1587		10.1007/s13361-011-0174-0			2011-09-01	2011	Improved methods for structural analyses of glycosaminoglycans (GAGs) are required to understand their functional roles in various biological processes. Major challenges in structural characterization of complex GAG oligosaccharides using liquid chromatography-mass spectrometry (LC-MS) include the accurate determination of the patterns of sulfation due to gas-phase losses of the sulfate groups up…						1			1	1044-0305		WOS:000294064500011
J	Morgan, Jess A. T.; Welch, David J.; Harry, Alistair V.; Street, Raewyn; Broderick, Damien; Ovenden, Jennifer R.						A mitochondrial species identification assay for Australian blacktip sharks (Carcharhinus tilstoni, C. limbatus and C. amblyrhynchoides) using real-time PCR and high-resolution melt analysis						MOLECULAR ECOLOGY RESOURCES			11	5			813	819		10.1111/j.1755-0998.2011.03023.x			2011-09-01	2011	Tropical Australian shark fisheries target two morphologically indistinguishable blacktip sharks, the Australian blacktip (Carcharhinus tilstoni) and the common blacktip (C. limbatus). Their relative contributions to northern and eastern Australian coastal fisheries are unclear because of species identification difficulties. The two species differ in their number of precaudal vertebrae, which is …						2			2	1755-098X		WOS:000293915800009
J	Vaughan, David B.; Chisholm, Leslie A.						Amendment of Pseudoleptobothrium Young, 1967 (Monogenea, Microbothriidae) with the description of Pseudoleptobothrium christisoni sp nov from the dermal denticles of Rhinobatos annulatus (Rhinobatidae) off the southern tip of Africa						ACTA PARASITOLOGICA			56	3			280	289		10.2478/s11686-011-0057-3			2011-09-01	2011	Pseudoleptobothrium christisoni sp. nov. is described from the dermal denticles of the dorsal skin surface of a single female Rhinobatos annulatus collected off Cape Agulhas, South Africa and destined for public exhibition at the Two Oceans Aquarium in Cape Town. This new species differs from the only other species in the genus, P. aptychotremae Young, 1967, primarily by the morphology of the mal…						1			1	1230-2821		WOS:000293558200007
J	Punzon, Antonio; Serrano, Alberto; Castro, Jose; Abad, Esther; Gil, Juan; Pereda, Pilar						Deep-water fishing tactics of the Spanish fleet in the Northeast Atlantic. Seasonal and spatial distribution						SCIENTIA MARINA			75	3			465	476		10.3989/scimar.2011.75n3465			2011-09-01	2011	The classification and identification of all the Spanish fishing activity targeting deep-sea species was conducted using a non-hierarchical classification technique designed for large matrices (CLARA). Otter trawl and set longlines were the main gears used in deep-sea ecosystems. The otter trawl fleet conducted 3 deep-sea fishing tactics. The only otter trawl fishing tactic targeting deep-sea spe…						0			0	0214-8358		WOS:000293661300006
J	Chapman, Clint A.; Harahush, Blake K.; Renshaw, Gillian M. C.						The physiological tolerance of the grey carpet shark (Chiloscyllium punctatum) and the epaulette shark (Hemiscyllium ocellatum) to anoxic exposure at three seasonal temperatures						FISH PHYSIOLOGY AND BIOCHEMISTRY			37	3			387	399		10.1007/s10695-010-9439-y			2011-09-01	2011	The epaulette shark (Hemiscyllium ocellatum) and the grey carpet shark (Chiloscyllium punctatum) are commonly found in periodically hypoxic environments. The ecophysiological time available for these animals to safely exploit these niches during different seasonal temperatures was examined. The time to loss of righting reflex (T (LRR)) was examined in response to an open ended anoxic challenge at…						2			2	0920-1742		WOS:000293295800005
J	Davidson, Bruce; Cliff, Geremy						Liver lipids of female Carcharias taurus (spotted raggedtooth) sharks: a comparison between seasons						FISH PHYSIOLOGY AND BIOCHEMISTRY			37	3			613	618		10.1007/s10695-010-9463-y			2011-09-01	2011	Female raggedtooth sharks (Carcharias taurus) migrate from the waters off the eastern Cape past KwaZulu-Natal and up to southern Mozambique and then back on an annual basis. They mate off the KwaZulu-Natal coast, gestate the pups off Mozambique, then deliver same off the eastern Cape. Prior to mating, they hypertrophise their livers and store large amounts of lipid, then towards the end of gestat…						0			0	0920-1742		WOS:000293295800027
J	Bargahi, Afshar; Hassan, Zuhair M.; Rabbani, A.; Langroudi, Ladan; Noori, S. H.; Safari, Elahe						Effect of shark cartilage derived protein on the NK cells activity						IMMUNOPHARMACOLOGY AND IMMUNOTOXICOLOGY			33	3			403	409		10.3109/08923973.2010.500294			2011-09-01	2011	Context: Shark cartilage has been used for its beneficial effects on various diseases. There are evidences, that shark cartilage stimulates cellular and humoral immune responses, which makes it an anti-tumor and immunomodulator candidate. Objective: The immunostimulatory effect of shark cartilage derived proteins on the cytotoxic activity of natural killer (NK) cells from healthy human peripheral…						1			1	0892-3973		WOS:000293528300001
J	Infante, Carlos; Ponce, Marian; Asensio, Esther; Zerolo, Ricardo; Manchado, Manuel						Molecular characterization of a novel type II keratin gene (sseKer3) in the Senegalese sole (Solea senegalensis): Differential expression of keratin genes by salinity						COMPARATIVE BIOCHEMISTRY AND PHYSIOLOGY B-BIOCHEMISTRY & MOLECULAR BIOLOGY			160	1			15	23		10.1016/j.cbpb.2011.04.004			2011-09-01	2011	Keratins make up the largest subgroup of intermediate filaments and, in chordates, represent the most abundant proteins in epithelial cells. Senegalese sole (Solea senegalensis) is a commercially important flatfish in which only two type I keratin genes, sseKer1 and sseKer2, have been described. We obtained the entire cDNAs encoding for a novel type II keratin, referred to as sseKer3. Main featur…						1			1	1096-4959		WOS:000293317800003
J	Schaeffner, Bjoern C.; Gasser, Robin B.; Beveridge, Ian						Ancipirhynchus afossalis n. g., n. sp (Trypanorhyncha: Otobothriidae), from two species of sharks off Indonesian and Malaysian Borneo						SYSTEMATIC PARASITOLOGY			80	1			1	15		10.1007/s11230-011-9309-8			2011-09-01	2011	A new genus of trypanorhynch cestode is described from two species of sharks, the sliteye shark Loxodon macrorhinus Muller & Henle and the straight-tooth weasel shark Paragaleus tengi (Chen) collected in the Makassar Strait (off Indonesian Borneo) and Sulu Sea (off Malaysian Borneo). Ancipirhynchus afossalis n. g., n. sp. possesses two bothria and a heteroacanthous, heteromorphous tentacular arma…						0			0	0165-5752		WOS:000293288000001
J	Gilman, Eric L.						Bycatch governance and best practice mitigation technology in global tuna fisheries						MARINE POLICY			35	5			590	609		10.1016/j.marpol.2011.01.021			2011-09-01	2011	Overexploitation of bycatch and target species in marine capture fisheries is the most widespread and direct driver of change and loss of global marine biodiversity. Bycatch in purse seine and pelagic longline tuna fisheries, the two primary gear types for catching tunas, is a primary mortality source of some populations of seabirds, sea turtles, marine mammals and sharks. Bycatch of juvenile tun…						2			2	0308-597X		WOS:000290749500005
J	Huang, Hsiang-Wen						Bycatch of high sea longline fisheries and measures taken by Taiwan: Actions and challenges						MARINE POLICY			35	5			712	720		10.1016/j.marpol.2011.02.0012			2011-09-01	2011	Taiwan is a major longline fishing nation with an interest in proactive conservation measures. Facing global concerns about the incidental catch in longline fisheries, Taiwan has focused on bycatch issues since the 2000s. This paper reviews the existing information on bycatch and the actions taken by Taiwan in the past ten years, including the establishment of observer programs, education and out…						1			2	0308-597X		WOS:000290749500017
J	Doughty, Paul; Oliver, Paul M.						A new species of Underwoodisaurus (Squamata: Gekkota: Carphodactylidae) from the Pilbara region of Western Australia						ZOOTAXA				3010			20	30					AUG 31 2011	2011	Ongoing surveys and systematic work focused on the Pilbara region in Western Australia have revealed the existence of numerous unrecognized species of reptiles. Here we describe Underwoodisaurus seorsus sp. nov., a new species similar to U. milii, but differing in its relatively plain dorsal and head patterns with only sparsely scattered pale tubercles, a much more gracile build, including longer…						0			0	1175-5326		WOS:000294720400002
J	Cornelius, Flemming; Mahmmoud, Yasser A.; Toyoshima, Chikashi						Metal Fluoride Complexes of Na,K-ATPase CHARACTERIZATION OF FLUORIDE-STABILIZED PHOSPHOENZYME ANALOGUES AND THEIR INTERACTION WITH CARDIOTONIC STEROIDS						JOURNAL OF BIOLOGICAL CHEMISTRY			286	34			29882	29892		10.1074/jbc.M111.259663			AUG 26 2011	2011	The Na,K-ATPase belongs to the P-type ATPase family of primary active cation pumps. Metal fluorides like magnesium-, beryllium-, and aluminum fluoride act as phosphate analogues and inhibit P-type ATPases by interacting with the phosphorylation site, stabilizing conformations that are analogous to specific phosphoenzyme intermediates. Cardiotonic steroids like ouabain used in the treatment of con…						4			4	0021-9258		WOS:000294046600047
J	Last, Peter R.; Gaudiano, Joe P.						Gollum suluensis sp nov (Carcharhiniformes: Pseudotriakidae), a new gollumshark from the southern Philippines						ZOOTAXA				3002			17	30					AUG 24 2011	2011	A second nominal species of the pseudotriakid genus Gollum, otherwise known as false catsharks or gollumsharks, is described on the basis of seven specimens collected from the Sulu Sea. Gollum suluensis sp. nov., was discovered at the Puerto Princesa fish market in Palawan during a project initiated by the World Wildlife Fund during the 1990s to investigate elasmobranch biodiversity in the Philip…						0			0	1175-5326		WOS:000294255800002
J	Chapple, Taylor K.; Jorgensen, Salvador J.; Anderson, Scot D.; Kanive, Paul E.; Klimley, A. Peter; Botsford, Louis W.; Block, Barbara A.						A first estimate of white shark, Carcharodon carcharias, abundance off Central California						BIOLOGY LETTERS			7	4			581	583		10.1098/rsbl.2011.0124			AUG 23 2011	2011	The decline of sharks in the global oceans underscores the need for careful assessment and monitoring of remaining populations. The northeastern Pacific is the home range for a genetically distinct clade of white sharks (Carcharodon carcharias). Little is known about the conservation status of this demographically isolated population, concentrated seasonally at two discrete aggregation sites: Cen…						4			4	1744-9561		WOS:000292639100030
J	Connor, Richard C.; Watson-Capps, Jana J.; Sherwin, William B.; Kruetzen, Michael						A new level of complexity in the male alliance networks of Indian Ocean bottlenose dolphins (Tursiops sp.)						BIOLOGY LETTERS			7	4			623	626		10.1098/rsbl.2010.0852			AUG 23 2011	2011	Male bottlenose dolphins in Shark Bay, Western Australia form two levels of alliances; two to three males cooperate to herd individual females and teams of greater than three males compete with other groups for females. Previous observation suggested two alliance tactics: small four to six member teams of relatives that formed stable pairs or trios and unrelated males in a large 14-member second-…						5			5	1744-9561		WOS:000292639100041
J	Marques, Antonio Carlos						Invasives: Sea of Data Still to Come						SCIENCE			333	6045			936	936					AUG 19 2011	2011							0			0	0036-8075		WOS:000294000400021
J	Erisman, Brad E.; Galland, Grantly R.; Mascarenas, Ismael; Moxley, Jerry; Walker, H. J.; Aburto-Oropeza, Octavio; Hastings, Philip A.; Ezcurra, Exequiel						List of coastal fishes of Islas Marias archipelago, Mexico, with comments on taxonomic composition, biogeography, and abundance						ZOOTAXA				2985			26	40					AUG 4 2011	2011	The first comprehensive list of 318 coastal fish species recorded from the Islas Marias Archipelago, Mexico, was compiled from recent fieldwork, archival museum collections, and literature references. The jacks (Carangidae, 18 species) and the labrisomid blennies (Labrisomidae, 16) were the most speciose families. Most recorded species occur throughout the tropical eastern Pacific (160 species), …						0			0	1175-5326		WOS:000293520900002
J	Hayley, Michael; Chevaldina, Tatiana; Heeley, David H.						Cold Adaptation of Tropomyosin						BIOCHEMISTRY			50	30			6559	6566		10.1021/bi200327g			AUG 2 2011	2011	The conformational stability of unphosphorylated and phosphorylated alpha,alpha-striated tropomyosins from rabbit and shark (95% identical sequences) has been investigated. Three additional core positions are occupied by atypical amino acids in the protein from shark: Thr179(d), Ser190(a), and Ser211(a). These changes are thought to have further destabilized most, if not all, of the carboxyl-term…						0			0	2960-06-01		WOS:000293035500005
J	Kobeasy, Mohamed I.; El-Beltagi, Hossam S.; El-Shazly, Manal A.; Khattab, Eman A. H.						Induction of resistance in Arachis hypogaea L. against Peanut mottle virus by nitric oxide and salicylic acid						PHYSIOLOGICAL AND MOLECULAR PLANT PATHOLOGY			76	2			112	118		10.1016/j.pmpp.2011.07.005			2011-08-01	2011	Peanut mottle virus (PeMV) causing mottling, yellowing, necrosis, malformation and stunting was isolated from naturally infected peanut plants grown in El-Sharkiya Governorate. The virus was isolated mechanically and identified by indirect ELISA using both specific and induced polyclonal antiserum. Effect of virus infection on cell organelles, detected by electron microscopy, showed different deg…						0			0	0885-5765		WOS:000296566700007
J	Donaldson, Michael R.; O'Connor, Connie M.; Thompson, Lisa A.; Gingerich, Andrew J.; Danylchuk, Sascha E.; Duplain, Rene R.; Cooke, Steven J.						Contrasting Global Game Fish and Non-Game Fish Species						FISHERIES			36	8			385	397		10.1080/03632415.2011.597672			2011-08-01	2011	We compared biological and ecological traits between global game fish and non-game fish species using an analysis with randomly chosen fish species from each group and an analysis where species were matched by body length. We used data from the International Game Fish Association (IGFA), FishBase, and the International Union for Conservation of Nature (IUCN) Red List of Threatened Species. Game f…						0			0	0363-2415		WOS:000296137600003
J	Ruiz, Diego J.; Wolff, Matthias						The Bolivar Channel Ecosystem of the Galapagos Marine Reserve: Energy flow structure and role of keystone groups						JOURNAL OF SEA RESEARCH			66	2			123	134		10.1016/j.seares.2011.05.006			2011-08-01	2011	The Bolivar Channel Ecosystem (BCE) is among the most productive zones in the Galapagos Marine Reserve (GMR). It is exposed to relatively cool, nutrient-rich waters of the Cromwell current, which are brought to the photic zone through topographic upwelling. The BCE is characterized by a heterogeneous rocky reef habitat covered by dense algae beds and inhabited by numerous invertebrate and fish sp…						1			1	1385-1101		WOS:000295149700009
J	Jahnert, Ricardo J.; Collins, Lindsay B.						Significance of subtidal microbial deposits in Shark Bay, Australia						MARINE GEOLOGY			286	2012-01-04			106	111		10.1016/j.margeo.2011.05.006			AUG 1 2011	2011	Microbial deposits at Shark Bay, Australia constitute one of the largest and most diverse modern occurrences around the world. The microbial carbonate system has developed in response to environmental change from near open marine into restricted embayment with hypersalinity and high evaporation. Bacterial sediments started depositing at about 2000 years BP, after the Holocene maximum flooding of …						0			0	0025-3227		WOS:000295104800008
J	Kotas, J. E.; Mastrochirico, V; Petrere Junior, M.						Age and growth of the Scalloped Hammerhead shark, Sphyrna lewini (Griffith and Smith, 1834), from the southern Brazilian coast						BRAZILIAN JOURNAL OF BIOLOGY			71	3			755	761					2011-08-01	2011	Age and growth studies for the scalloped hammerhead shark, Sphyrna lewini (Griffith and Smith, 1834) caught along the southern Brazilian coast, were based on ring measurements of vertebrae sections of 115 males, 116 females and 14 unknown sexed sharks between 48 and 344 cm total length (TL). The von Bertalanffy growth models were best fit using back-calculated data. The growth parameters obtained…						0			0	1519-6984		WOS:000294437100022
J	Flajnik, Martin F.; Deschacht, Nick; Muyldermans, Serge						A Case Of Convergence: Why Did a Simple Alternative to Canonical Antibodies Arise in Sharks and Camels?						PLOS BIOLOGY			9	8					e1001120	10.1371/journal.pbio.1001120			2011-08-01	2011							3			3	1544-9173		WOS:000294483000003
J	Dong, Bing; Ren, De-Qing; Zhang, Xi						Stochastic parallel gradient descent based adaptive optics used for a high contrast imaging coronagraph						RESEARCH IN ASTRONOMY AND ASTROPHYSICS			11	8			997	1002					2011-08-01	2011	An adaptive optics (AO) system based on a stochastic parallel gradient descent (SPGD) algorithm is proposed to reduce the speckle noises in the optical system of a stellar coronagraph in order to further improve the contrast. The principle of the SPGD algorithm is described briefly and a metric suitable for point source imaging optimization is given. The feasibility and good performance of the SP…						2			2	1674-4527		WOS:000294232800011
J	Noriega, Rocio; Werry, Jonathan Mark; Sumpton, Wayne; Mayer, David; Lee, Shing Yip						Trends in annual CPUE and evidence of sex and size segregation of Sphyrna lewini: Management implications in coastal waters of northeastern Australia						FISHERIES RESEARCH			110	3			472	477		10.1016/j.fishres.2011.06.005			2011-08-01	2011	Hammerhead sharks have experienced a drastic global reduction in abundance, yet limited data exist on their general biology and population structure. We use generalised linear models (GLMs) to analyse historical mesh net and drumline catches (1996-2006) of Sphyrna lewini from the Queensland Shark Control Program (QSCP), which covers 10 locations on the north-east coast of Australia. Results show …						0			0	0165-7836		WOS:000293870400011
J	Claeson, Kerin M.; Hilger, Andre						Morphology of the anterior vertebral region in elasmobranchs: special focus, Squatiniformes						FOSSIL RECORD			14	2			129	140		10.1002/mmng.201100003			2011-08-01	2011	The morphology of extant and extinct Squatiniformes is well conserved within this lineage, but differences are of consequence to character interpretations for phylogenetic analyses. Investigation of the extinct taxon dagger Pseudorhina alifera (Munster, 1842) from the Late Jurassic of Solnhofen with extant species of Squatina provide new evidence that members of Squatiniformes possess a basioccip…						0			0	1435-1943		WOS:000293773100003
J	Juarez, Karla; Dubberke, Gudrun; Lugo, Pavel; Koch-Nolte, Friedrich; Buck, Friedrich; Haag, Friedrich; Licea, Alexei						Monoclonal Antibodies for the Identification and Purification of vNAR Domains and IgNAR Immunoglobulins from the Horn Shark Heterodontus francisci						HYBRIDOMA			30	4			323	329		10.1089/hyb.2011.0010			2011-08-01	2011	In addition to conventional antibodies, cartilaginous fish have evolved a distinctive type of immunoglobulin, designated as IgNAR, which lacks the light polypeptide chains and is composed entirely by heavy chains. IgNAR molecules can be manipulated by molecular engineering to produce the variable domain of a single heavy chain polypeptide (vNARs). These, together with the VHH camel domains, const…						0			0	1554-0014		WOS:000294041200001
J	Brummer, Gage; Littlechild, Stacy; McCall, Scott; Zhang, Yuntao; Conrad, Gary W.						The Role of Nonenzymatic Glycation and Carbonyls in Collagen Cross-Linking for the Treatment of Keratoconus						INVESTIGATIVE OPHTHALMOLOGY & VISUAL SCIENCE			52	9			6363	6369		10.1167/iovs.11-7585			2011-08-01	2011	PURPOSE. Corneal cross-linking (CXL) is a treatment for keratoconus that eliminates the need for keratoplasty in most patients. However, its molecular mechanisms remain under study. Advanced glycation end products (AGEs) have been suggested by many studies as the causative strengthening agent during CXL, though no studies to date have directly tested this hypothesis.METHODS. Corneas of young rabb…						1			1	0146-0404		WOS:000293849400042
J	Adnet, S.; Cappetta, H.; Elnahas, S.; Strougo, A.						A new Priabonian Chondrichthyans assemblage from the Western desert, Egypt: Correlation with the Fayum oasis						JOURNAL OF AFRICAN EARTH SCIENCES			61	1			27	37		10.1016/j.jafrearsci.2011.04.005			2011-08-01	2011	While the Middle/Late Eocene marine vertebrates in Egypt have been largely reported around the Fayum oasis, few reports were made elsewhere. Here we report a new fossil site (Km55) located near the Bahariya Oasis in the Western desert of Egypt. This fossiliferous outcrop has yielded abundant fossil material of invertebrates dated to the Middle/Late Eocene and some chondrichthyan remains that test…						0			0	1464-343X		WOS:000293426800003
J	Storelli, Maria Maddalena; Perrone, Veronica Giuliana; Barone, Grazia						Organochlorine residues (PCBs and DDTs) in two Torpedinid species liver from the Southeastern Mediterranean Sea						ENVIRONMENTAL SCIENCE AND POLLUTION RESEARCH			18	7			1160	1165		10.1007/s11356-011-0463-y			2011-08-01	2011	Polychlorinated biphenyls (PCBs), dichlorodiphenyltrichloroethane (DDT) and PCB congeners accumulation profile were measured in the liver of two torpedinid species (Torpedo nobiliana and Torpedo marmorata) from the Mediterranean Sea (Adriatic Sea) in order to investigate the relative toxicological impact of these highly toxic PCBs in the organisms in question.A Thermo Trace GC connected to a Ther…						0			0	0944-1344		WOS:000293637800012
J	Gomes, Antony; Alam, Md. Aftab; Bhattacharya, Sourav; Dasgupta, Subir Chandra; Mukherjee, Sanghamitra; Bhattacharya, Shamik; Gomes, Aparna						Ethno biological usage of zoo products in rheumatoid arthritis						INDIAN JOURNAL OF EXPERIMENTAL BIOLOGY			49	8			565	573					2011-08-01	2011	Rheumatoid arthritis (RA) is one of the most common autoimmune disorder which causes swelling, redness, pain, stiffness, restriction of limb movements, decreases life expectancy and early death of the patients. Available drugs include non steroidal anti-inflammatory and analgesics, disease modifying anti-rheumatic drugs and steroids (glucocorticoids etc). All these drugs have their own limitation…						0			0	0019-5189		WOS:000293674700001
J	Dubrocq-Baritaud, C.; Darque-Ceretti, E.; Vergnes, B.						Influence of die surface on the efficiency of fluoropolymer processing aids during the extrusion of linear-low density polyethylene						JOURNAL OF NON-NEWTONIAN FLUID MECHANICS			166	14-15			847	858		10.1016/j.jnnfm.2011.05.002			2011-08-01	2011	Nowadays, fluoropolymer based Polymer Processing Aids (PPA) are currently used to eliminate surface defects and to reduce die pressure in linear polyolefins extrusion. For 10 years, the main origins of the PPA actions are known: PPA discontinuously coat the die surface and create wall slip that delays the sharkskin defect. However, the microscopic parameters that govern PPA efficiency are not rea…						0			0	0377-0257		WOS:000293603700008
J	Wirsing, Aaron J.; Ripple, William J.						A comparison of shark and wolf research reveals similar behavioral responses by prey						FRONTIERS IN ECOLOGY AND THE ENVIRONMENT			9	6			335	341		10.1890/090226			2011-08-01	2011	Marine and terrestrial ecologists rarely exchange information, yet comparing research from both sides of the land-sea boundary holds great potential for improving our understanding of ecological processes. For example, by comparing the interaction between tiger sharks (Galeocerdo cuvier) and dugongs (Dugong dugon) to that between gray wolves (Canis lupus) and elk (Cervus elaphus), we show that to…						2			2	1540-9295		WOS:000293532500020
J	Flajnik, Martin F; Deschacht, Nick; Muyldermans, Serge						A case of convergence: why did a simple alternative to canonical antibodies arise in sharks and camels?						PLoS biology			9	8			e1001120						2011-Aug	2011							0			0	1545-7885		MEDLINE:21829328
J	Williams, Gregory D.; Andrews, Kelly S.; Farrer, Deborah A.; Bargmann, Gregory G.; Levin, Phillip S.						Occurrence and biological characteristics of broadnose sevengill sharks (Notorynchus cepedianus) in Pacific Northwest coastal estuaries						ENVIRONMENTAL BIOLOGY OF FISHES			91	4			379	388		10.1007/s10641-011-9797-z			2011-08-01	2011	The broadnose sevengill shark (Notorynchus cepedianus) is a high-order marine predator distributed worldwide in shallow coastal waters of temperate seas. Recent reports have suggested it may be a prevalent component of Pacific Northwest coastal estuarine communities, although biological characteristics of the shark population remain undocumented despite growing interest in recreational harvest of…						0			0	0378-1909		WOS:000293297300002
J	Bornatowski, H.; Simoes Vitule, J. R.; Abilhoa, V.; Maia Correa, M. F.						Unconventional fishing for large sharks in the State of Parana, southern Brazil: a note of concern						JOURNAL OF APPLIED ICHTHYOLOGY			27	4			1108	1111		10.1111/j.1439-0426.2010.01600.x			2011-08-01	2011							0			0	0175-8659		WOS:000292935100025
J	Javadzadeh, N.; Vosoughi, G.; Fatemi, M. R.; Abdoli, A.; Valinassab, T.						The first record of mesopelagic shark, Echinorhinus brucus (Bonnaterre, 1788; Squaliformes; Echinorhinidae), from the Oman Sea, Iran						JOURNAL OF APPLIED ICHTHYOLOGY			27	4			1119	1119		10.1111/j.1439-0426.2010.01615.x			2011-08-01	2011							0			0	0175-8659		WOS:000292935100028
J	Stanton, Margaret A.; Gibson, Quincy A.; Mann, Janet						When mum's away: a study of mother and calf ego networks during separations in wild bottlenose dolphins (Tursiops sp.)						ANIMAL BEHAVIOUR			82	2			405	412		10.1016/j.anbehav.2011.05.026			2011-08-01	2011	Early social development in long-lived social mammals has important implications for adult behaviour, particularly in taxa that exhibit stable long-term bonds. In one such species, bottlenose dolphins, calves have precocious locomotion, enabling them to separate from their mothers soon after birth and associate with other dolphins in the absence of direct maternal influence. To investigate mother…						0			0	3472-03-01		WOS:000292960400031
J	Herrero, Beatriz; Lago, Fatima C.; Vieites, Juan M.; Espineira, Montserrat						Authentication of swordfish (Xiphias gladius) by RT-PCR and FINS methodologies						EUROPEAN FOOD RESEARCH AND TECHNOLOGY			233	2			195	202		10.1007/s00217-011-1502-0			2011-08-01	2011	In the present study, two methods for the authentication of swordfish (Xiphias gladius) were developed. The first one is based on a TaqMan probe real-time PCR technology using the cytochrome oxidase subunit I (COI), while the second one is based on the phylogenetic analysis of DNA sequences (forensically informative nucleotide sequencing, FINS) using the cytochrome b (cyt b) gene fragment. Both t…						1			1	1438-2377		WOS:000292978400002
J	Glasa, Miroslav; Malinowski, Tadeusz; Predajna, Lukas; Pupola, Neda; Dekena, Dzintra; Michalczuk, Lech; Candresse, Thierry						Sequence Variability, Recombination Analysis, and Specific Detection of the W Strain of Plum pox virus						PHYTOPATHOLOGY			101	8			980	985		10.1094/PHYTO-12-10-0334			2011-08-01	2011	Plum pox virus (PPV), a member of the genus Potyvirus, is the causal agent of Sharka, the most detrimental disease of stone-fruit trees worldwide. PPV isolates are grouped into seven distinct strains. The minor PPV-W strain was established recently for the divergent W3174 isolate found in Canada. Here, the partial or complete genomic sequences of four PPV-W isolates from Latvia have been determin…						0			0	0031-949X		WOS:000292989900010
J	McClusky, Leon M.						Testicular Degeneration during Spermatogenesis in the Blue Shark, Prionace glauca: Nonconformity with Expression as Seen in the Diametric Testes of Other Carcharhinids						JOURNAL OF MORPHOLOGY			272	8			938	948		10.1002/jmor.10958			2011-08-01	2011	The elasmobranch testis consists of spherical spermatocysts, each housing a single germ cell stage and its own clone of Sertoli cells. Because of the simple diametrical arrangement of cysts in maturational order, the testes of Squalus acanthias, Scyliorhinus canicula, and Prionace glauca are classified as the diametric shark testis type. The aim of this study was to document histologically the sp…						0			0	0362-2525		WOS:000292603300003
J	Zeiss, Caroline J.; Schwab, Ivan R.; Murphy, Christopher J.; Dubielzig, Richard W.						Comparative Retinal Morphology of the Platypus						JOURNAL OF MORPHOLOGY			272	8			949	957		10.1002/jmor.10959			2011-08-01	2011	The purpose of this study is to identify evolutionary origin and fate of anatomic features of the duck-billed platypus eye. Eyes from the duck-billed platypus and four key evolutionary basal vertebrates (Pacific hagfish, north hemisphere sea lamprey, and Australian and South American lungfishes) were prepared for light microscopy. In addition to a standard panel of stains, tissues were immunostai…						0			0	0362-2525		WOS:000292603300004
J	Cousteau, Voltaire						How to swim with sharks: a primer.						Thoracic surgery clinics			21	3			441	2					2011-Aug	2011	Swimming with the sharks is neither enjoyable nor exhilarating, and it is not an acknowledged sport. Some individuals, however, must swim by virtue of their occupation. If such an individual finds himself or herself in shark-infested waters, this article provides useful guidelines for survival.						0			0	1547-4127		MEDLINE:21762867
J	Vera Ruiz, Elsa Maria; Soriano, Jose Miguel; Romero, Carlos; Zhebentyayeva, Tetyana; Terol, Javier; Zuriaga, Elena; Llacer, Gerardo; Abbott, Albert Glenn; Badenes, Maria Luisa						Narrowing down the apricot Plum pox virus resistance locus and comparative analysis with the peach genome syntenic region.						Molecular plant pathology			12	6			535	47		10.1111/j.1364-3703.2010.00691.x			2011-Aug	2011	Sharka disease, caused by the Plum pox virus (PPV), is one of the main limiting factors for stone fruit crops worldwide. Only a few resistance sources have been found in apricot (Prunus armeniaca L.), and most studies have located a major PPV resistance locus (PPVres) on linkage group 1 (LG1). However, the mapping accuracy was not sufficiently reliable and PPVres was predicted within a low confid…						0			0	1364-3703		MEDLINE:21722293
J	Vera Ruiz, Elsa Maria; Miguel Soriano, Jose; Romero, Carlos; Zhebentyayeva, Tetyana; Terol, Javier; Zuriaga, Elena; Llacer, Gerardo; Abbott, Albert Glenn; Luisa Badenes, Maria						Narrowing down the apricot Plum pox virus resistance locus and comparative analysis with the peach genome syntenic region						MOLECULAR PLANT PATHOLOGY			12	6			535	547		10.1111/J.1364-3703.2010.00691.X			2011-08-01	2011	Sharka disease, caused by the Plum pox virus (PPV), is one of the main limiting factors for stone fruit crops worldwide. Only a few resistance sources have been found in apricot (Prunus armeniaca L.), and most studies have located a major PPV resistance locus (PPVres) on linkage group 1 (LG1). However, the mapping accuracy was not sufficiently reliable and PPVres was predicted within a low confid…						1			1	1464-6722		WOS:000292309700002
J	Zaiden, Sergio Fonseca; Brinn, Richard Phillip; Marcon, Jaydione Luiz; Urbinati, Elisabeth Criscuolo						Testicular structure and spermatogenesis of Amazonian freshwater cururu stingray Potamotrygon cf. histrix						ZYGOTE			19	3			245	253		10.1017/S0967199410000298			2011-08-01	2011	The cururu stingray Potamotrygon cf. histrix, a new and endemic Amazonian freshwater species, presents appropriate characteristics for fish keeping and is exploited from its natural environment. The present study identified the testicular structure and spermatogenesis of this species. Gonads from adult male specimens were dissected, fixed and processed for histological analysis. The testes were o…						0			0	0967-1994		WOS:000292281400007
J	Campana, Steven						Demon Fish: Travels Through the Hidden World of Sharks						NATURE			475	7357			451	452					JUL 28 2011	2011							0			0	0028-0836		WOS:000293167900017
J	Patterson, Eric M.; Mann, Janet						The Ecological Conditions That Favor Tool Use and Innovation in Wild Bottlenose Dolphins (Tursiops sp.)						PLOS ONE			6	7					e22243	10.1371/journal.pone.0022243			JUL 20 2011	2011	Dolphins are well known for their exquisite echolocation abilities, which enable them to detect and discriminate prey species and even locate buried prey. While these skills are widely used during foraging, some dolphins use tools to locate and extract prey. In the only known case of tool use in free-ranging cetaceans, a subset of bottlenose dolphins (Tursiops sp.) in Shark Bay, Western Australia…						2			2	1932-6203		WOS:000292931200037
J	Maynou, Francesc; Sbrana, Mario; Sartor, Paolo; Maravelias, Christos; Kavadas, Stefanos; Damalas, Dimitros; Cartes, Joan E.; Osio, Giacomo						Estimating Trends of Population Decline in Long-Lived Marine Species in the Mediterranean Sea Based on Fishers' Perceptions						PLOS ONE			6	7					e21818	10.1371/journal.pone.0021818			JUL 19 2011	2011	We conducted interviews of a representative sample of 106 retired fishers in Italy, Spain and Greece, asking specific questions about the trends they perceived in dolphin and shark abundances between 1940 and 1999 (in three 20 year periods) compared to the present abundance. The large marine fauna studied were not target species of the commercial fleet segment interviewed (trawl fishery). The fis…						0			0	1932-6203		WOS:000292929500011
J	Brown, James Hemphill						Changes in ranges of large ocean fish						PROCEEDINGS OF THE NATIONAL ACADEMY OF SCIENCES OF THE UNITED STATES OF AMERICA			108	29			11735	11736		10.1073/pnas.1109139108			JUL 19 2011	2011							0			0	0027-8424		WOS:000292876900014
J	Nance, Holly A.; Klimley, Peter; Galvan-Magana, Felipe; Martinez-Ortiz, Jimmy; Marko, Peter B.						Demographic Processes Underlying Subtle Patterns of Population Structure in the Scalloped Hammerhead Shark, Sphyrna lewini						PLOS ONE			6	7					e21459	10.1371/journal.pone.0021459			JUL 14 2011	2011	Genetic diversity (theta), effective population size (N(e)), and contemporary levels of gene flow are important parameters to estimate for species of conservation concern, such as the globally endangered scalloped hammerhead shark, Sphyrna lewini. Therefore, we have reconstructed the demographic history of S. lewini across its Eastern Pacific (EP) range by applying classical and coalescent popula…						1			1	1932-6203		WOS:000292811300009
J	Turrisi, Giuseppe Fabrizio; Smith, David R.						Systematic revision and phylogeny of the endemic southeastern Asian Pristaulacus comptipennis species group (Hymenoptera: Aulacidae)						ZOOTAXA				2959			1	72					JUL 8 2011	2011	The endemic southeastern Asiatic Pristaulacus comptipennis species group is revised and illustrated. Twenty species are recognized: P. asiaticus Turrisi & Smith, sp. nov. (China), P. boninensis Konishi (Japan), P. comptipennis Enderlein (Japan, China, Taiwan, Laos), P. corellianus Turrisi & Smith, sp. nov. (Laos), P. dilleri Turrisi & Smith, sp. nov. (Laos), P. emarginaticeps Turner (Vietnam), P.…						0			0	1175-5326		WOS:000292507200001
J	Springauf, Andreas; Bresenitz, Pia; Gruender, Stefan						The Interaction between Two Extracellular Linker Regions Controls Sustained Opening of Acid-sensing Ion Channel 1						JOURNAL OF BIOLOGICAL CHEMISTRY			286	27			24374	24384		10.1074/jbc.M111.230797			JUL 8 2011	2011	Activation of acid-sensing ion channels (ASICs) contributes to neuronal death during stroke, to axonal degeneration during neuroinflammation, and to pain during inflammation. Although understanding ASIC gating may help to modulate ASIC activity during these pathologic situations, at present it is poorly understood. The ligand, H(+), probably binds to several sites, among them amino acids within t…						1			1	0021-9258		WOS:000292294900077
J	Block, B. A.; Jonsen, I. D.; Jorgensen, S. J.; Winship, A. J.; Shaffer, S. A.; Bograd, S. J.; Hazen, E. L.; Foley, D. G.; Breed, G. A.; Harrison, A. -L.; Ganong, J. E.; Swithenbank, A.; Castleton, M.; Dewar, H.; Mate, B. R.; Shillinger, G. L.; Schaefer, K. M.; Benson, S. R.; Weise, M. J.; Henry, R. W.; Costa, D. P.						Tracking apex marine predator movements in a dynamic ocean						NATURE			475	7354			86	90		10.1038/nature10082			JUL 7 2011	2011	Pelagic marine predators face unprecedented challenges and uncertain futures. Overexploitation and climate variability impact the abundance and distribution of top predators in ocean ecosystems(1-4). Improved understanding of ecological patterns, evolutionary constraints and ecosystem function is critical for preventing extinctions, loss of biodiversity and disruption of ecosystem services. Recen…						16			16	0028-0836		WOS:000292461300050
J	Flammang, Brooke E.; Ebert, David A.; Cailliet, Gregor M.						INTRASPECIFIC AND INTERSPECIFIC SPATIAL DISTRIBUTION OF THREE EASTERN NORTH PACIFIC CATSHARK SPECIES AND THEIR EGG CASES (CHONDRICHTHYES: SCYLIORHINIDAE)						Breviora				525			1	18					JUL 6 2011	2011	Information on the distribution of three species of eastern North Pacific (ENP) catsharks (Apristurus brunneus, Apristurus kampae, and Parmaturus xaniurus) and their egg cases was previously unavailable despite being a species of interest for fisheries management evaluation and policy regulation. Data were generated from specimens collected by survey cruises from June 2001 through October 2004 be…						0			0	9698-06-01		BCI:BCI201100552115
J	Ardura, A.; Jardon, A.; Hernandez, E.; Martinez, J. L.; Garcia-Vazquez, E.						DNA analysis reveals potential risks for fish species conservation derived from mislabeling of dietetic complements			Part 1			JOURNAL OF FOOD AGRICULTURE & ENVIRONMENT			9	2012-03-04			53	56					JUL-OCT 2011	2011	Accurate and complete labeling of food is a consumer's right necessary for conscious and informed nutrition. In this study, mislabeling due to species substitution has been detected in fish-based dietetic complements using DNA-based molecular methods. These methods can be considered to design traceability and labeling systems indispensable for food safety, in order to avoid health risks, like all…						0			0	1459-0255		WOS:000297447200012
J	Andre, Marisa C.; Fraga, Ana; Garcia, Carlos Ruiz; Pignatelli, Joao Goes; Soares, Rui Oliveira						Shark island pedicle flap for repairing of basal cell carcinoma localized in nasal ala-perialar region. A simple procedure						ANAIS BRASILEIROS DE DERMATOLOGIA			86	4			160	163				1	JUL-AUG 2011	2011	Basal Cell Carcinoma is the most common skin cancer. We describe a single-staged technique for correction of nasal ala defect after the excision of a basal cell carcinoma. This technique allows correction of surgical defects of the ala rebuilding the original anatomy, maintaining cosmetic units, without need for a graft.						0			0	0365-0596		WOS:000297759000042
J	Andre, Marisa C; Fraga, Ana; Garcia, Carlos Ruiz; Pignatelli, Joao Goes; Soares, Rui Oliveira						Shark island pedicle flap for repairing of basal cell carcinoma localized in nasal ala-perialar region: a simple procedure.						Anais brasileiros de dermatologia			86	4 Suppl 1			S160	3					2011 Jul-Aug	2011	Basal Cell Carcinoma is the most common skin cancer. We describe a single-staged technique for correction of nasal ala defect after the excision of a basal cell carcinoma. This technique allows correction of surgical defects of the ala rebuilding the original anatomy, maintaining cosmetic units, without need for a graft.						0			0	1806-4841		MEDLINE:22068800
J	Carvalho, Rodrigo; Maio, Paula; Lamarao, Paulo; Cardoso, Jorge						Modified shark island flap for combined nasal ala-perialar defects						EUROPEAN JOURNAL OF DERMATOLOGY			21	4			612	613		10.1684/ejd.2011.1320			JUL-AUG 2011	2011							0			0	1167-1122		WOS:000296095100041
J	Long, John H., Jr.; Koob, Tom; Schaefer, Justin; Summers, Adam; Bantilan, Kurt; Grotmol, Sindre; Porter, Marianne						Inspired by Sharks: A Biomimetic Skeleton for the Flapping, Propulsive Tail of an Aquatic Robot						MARINE TECHNOLOGY SOCIETY JOURNAL			45	4			119	129					JUL-AUG 2011	2011	The vertebral column is the primary stiffening element of the body of fish. This serially jointed axial support system offers mechanical control of body bending through kinematic constraint and viscoelastic behavior. Because of the functional importance of the vertebral column in the body undulations that power swimming, we targeted the vertebral column of cartilaginous fishes-sharks, skates, and…						0			0	0025-3324		WOS:000294738700014
J	Lang, Amy; Motta, Philip; Habegger, Maria Laura; Hueter, Robert; Afroz, Farhana						Shark Skin Separation Control Mechanisms						MARINE TECHNOLOGY SOCIETY JOURNAL			45	4			208	215					JUL-AUG 2011	2011	Drag reduction by marine organisms has undergone millions of years of natural selection, and from these organisms biomimetic studies can derive new technologies. The shortfin mako (Isurus oxyrinchus), considered to be one of the fastest and most agile marine predators, is known to have highly flexible scales on certain locations of its body. This scale flexibility is theorized to provide a passiv…						0			0	0025-3324		WOS:000294738700021
J	Martin, Jennifer Adams						when sharks (don't) attack: wild animal agency in historical narratives						ENVIRONMENTAL HISTORY			16	3			451	455		10.1093/envhis/emr051			2011-07-01	2011	Compared to the endangered animals described in Peter Matthiessen's Wildlife in America, the shark that attacked and consumed Robert Pamperin in June 1959 off La Jolla, California, suggests that a creature's silence did not always mean vulnerability or passivity within human histories. To help understand why this shark targeted Pamperin and the more general question of why these animals sometimes…						0			0	1084-5453		WOS:000293601700012
J	Miller, L. J.; Kuczaj, S.; Herzing, D.						Stereotypic Behavior in Wild Marine Carnivores?						ZOO BIOLOGY			30	4			365	370		10.1002/zoo.20347			JUL-AUG 2011	2011	Stereotypic behavior is observed in many species within zoological institutions. Attempts to reduce such behavior typically involve some form of environmental enrichment that provides opportunities for species appropriate behavior or some degree of control within the environment. However, environmental enrichment has never been completely successful in eliminating stereotypic behavior for an enti…						0			0	0733-3188		WOS:000294163600003
[truncated: 1,429 more rows]

## Sheet: Red Sea
PT	AU	BA	CA	GP	BE	Z2	TI	Z1	FT	PN	AE	Z3	SO	SE	BS	VL	IS	SI	MA	BP	EP	AR	DI	D2	SU	PD	PY	AB	Z4	CT	CY	SP	CL	TC	Z8	ZB	Z9	SN	BN	UT
[truncated: 40 more rows]

## Sheet: removed from Red Sea
REASON FOR EXCLUSION	AU	BA	CA	GP	BE	Z2	TI	Z1	FT	PN	AE	Z3	SO	SE	BS	VL	IS	SI	MA	BP	EP	AR	DI	D2	SU	PD	PY	AB	Z4	CT	CY	SP	CL	TC	Z8	ZB	Z9	SN	BN	UT		Removal Reason
[truncated: 39 more rows]

[truncated: 4 more sheets: without Aqaba, removed Aqaba, GBR, Caribbean]
