# Supplementary material for: The status of coral reef ecology research in the Red Sea
Source: Springer Nature journal article supplement (doi:10.1007/s00338-013-1055-8), 2013-06-20
Supplement: MOESM6 [file 338_2013_1055_MOESM6_ESM.xlsx]

## Sheet: Summary
	Red Sea		Great Barrier Reef	Caribbean	All		Search Terms:	("marine reserve*" or "marine protected area*" or "no take zone*" or "no entry zone*") and ("fisheries*" or "spillover*" or "catch*" or "fishing*")
	all	excluding Eilat/Aqaba
	17	10	220	152	2247

## Sheet: All
PT	AU	BA	CA	GP	RI	BE	Z2	TI	Z1	FT	PN	AE	Z3	SO	SE	BS	VL	IS	SI	MA	BP	EP	AR	DI	D2	SU	PD	PY	AB	Z4	CT	CY	SP	CL	TC	Z8	ZB	Z9	SN	BN	UT
J	Chakraborty, Kunal; Kar, T K							Economic perspective of marine reserves in fisheries: A bioeconomic model.						Mathematical biosciences			240	2			212	22		10.1016/j.mbs.2012.07.008			2012-Dec	2012	The present paper describes a prey-predator type fishery model with prey dispersal in a two-patch environment, one of which is a free fishing zone and other is protected zone. The objective of the paper is to maximize the net economic revenue earn from the fishery through implementing the sustainable properties of the fishery to keep the ecological balance. Biological measures are introduced to i…						0	0	0	0	1879-3134		MEDLINE:22921342
J	Kompas, Tom; Chu, Long							Comparing approximation techniques to continuous-time stochastic dynamic programming problems: Applications to natural resource modelling						ENVIRONMENTAL MODELLING & SOFTWARE			38				1	12					2012-12-12	2012	Dynamic programming problems are common in economics, finance and natural resource management. However, exact solutions to these problems are exceptional. Instead, solutions typically rely on numerical approximation techniques which vary in use, complexity and computational requirements. Perturbation, projection and linear programming approaches are among the most useful of these numerical techni…						0	0	0	0	1364-8152		CCC:000308971400001
J	Langlois, T. J.; Harvey, E. S.; Meeuwig, J. J.				Harvey, Euan/B-2896-2011			Strong direct and inconsistent indirect effects of fishing found using stereo-video: Testing indicators from fisheries closures						ECOLOGICAL INDICATORS			23				524	534		10.1016/j.ecolind.2012.04.030			2012-12-12	2012	Candidate indicators of the direct and indirect effects of fishing can be developed by investigating fisheries closures. We tested a suite of such indicators in areas open to fishing but with suspected differences in effort, using baited remote underwater stereo-video methods. In particular, we predicted that greater fishing would result in decreased biomass of high risk target species and indire…						0	0	0	0	1470-160X		WOS:000307130300055
J	Stoner, Allan W.; Mueller, Karl W.; Brown-Peterson, Nancy J.; Davis, Martha H.; Booker, Catherine J.							Maturation and age in queen conch (Strombus gigas): Urgent need for changes in harvest criteria						FISHERIES RESEARCH			131				76	84		10.1016/j.fishres.2012.07.017			2012-11-12	2012	The queen conch (Strombus gigas) is a large economically important gastropod that has been severely depleted throughout much of the Caribbean region. The species has determinate growth and reaches maximum shell length before sexual maturation; thereafter the shell grows only in thickness. In this study, queen conch were collected in the Exuma Cays, Bahamas, to evaluate maturity with respect to sh…						0	0	0	0	0165-7836		WOS:000308903500011
J	Ainsworth, C. H.; Morzaria-Luna, H.; Kaplan, I. C.; Levin, P. S.; Fulton, E. A.; Cudney-Bueno, R.; Turk-Boyer, P.; Torre, J.; Danemann, G. D.; Pfister, T.				Fulton, Elizabeth/A-2871-2008			Effective ecosystem-based management must encourage regulatory compliance: A Gulf of California case study						MARINE POLICY			36	6			1275	1283					2012-11-12	2012	The Northern Gulf of California is an area important for small-scale fisheries in terms of economic activity and food security, but widespread non-compliance with fisheries regulations impedes effective management of resources and conservation efforts. Where a previous study evaluated quantitatively a theoretical situation in which all regulations are perfectly followed, this article compares a s…						0	0	0	0	0308-597X		CCC:000305724000009
J	Teh, Lydia C. L.; Teh, Louise S. L.; Pitcher, Tony J.							A tool for site prioritisation of marine protected areas under data poor conditions						MARINE POLICY			36	6			1290	1300					2012-11-12	2012	A challenge of managing data poor fisheries lies in overcoming uncertainties associated with a lack of information on biological and socio-economic conditions. This paper focuses on site prioritisation for marine protected areas, a process that usually imposes moderate to heavy demands on data, time, local expertise, and funds. A fuzzy logic decision support tool for zoning marine areas that is s…						0	0	0	0	0308-597X		CCC:000305724000011
J	Lozano-Montes, Hector M.; Babcock, Russ; Loneragan, Neil R.							Exploring the effects of spatial closures in a temperate marine ecosystem in Western Australia: A case study of the western rock lobster (Panulirus cygnus) fishery						ECOLOGICAL MODELLING			245		SI		31	40					OCT 24 2012	2012	An Ecospace model, was developed to investigate the potential impacts of spatial closures on key species and the food webs in the Jurien Bay Marine Park (JBMP), central Western Australia (823 km(2)). The model comprised 80 functional groups (more than 200 species). The JBMP is a multiple use-marine park with several types of zoning and the effects of these on rock lobster biomass, mortalities and…						0	0	0	0	0304-3800		CCC:000309374600005
J	Bertrand, Sophie; Joo, Rocio; Arbulu Smet, Claude; Tremblay, Yann; Barbraud, Christophe; Weimerskirch, Henri							Local depletion by a fishery can affect seabird foraging						JOURNAL OF APPLIED ECOLOGY			49	5			1168	1177		10.1111/j.1365-2664.2012.02190.x			2012-10-12	2012	Long-term demographic studies show that seabird populations may suffer from competition with fisheries. Understanding this process is critical for the implementation of an ecosystem approach to fisheries management (EAF). Existing studies rely mostly on indirect clues: overlaps between seabird foraging and fishing areas, comparing fish catches by seabirds and vessels. The study is based on a GPS …						0	0	0	0	0021-8901		WOS:000308932600022
J	Villamor, Adriana; Becerro, Mikel A.							Species, trophic, and functional diversity in marine protected and non-protected areas						JOURNAL OF SEA RESEARCH			73				109	116		10.1016/j.seares.2012.07.002			2012-10-12	2012	The number of Marine Protected Areas (MPAs) has grown exponentially in the last decades as marine environments steadily deteriorate. The success of MPAs stems from the overall positive benefits attributed to the "reserve effect," the totality of the consequences of protecting marine systems. The reserve effect includes but is beyond the goal of protecting particular species or areas with economic…						0	0	0	0	1385-1101		WOS:000309032600012
J	Auge, A. A.; Moore, A. B.; Chilvers, B. L.							Predicting interactions between recolonising marine mammals and fisheries: defining precautionary management						FISHERIES MANAGEMENT AND ECOLOGY			19	5			426	433		10.1111/j.1365-2400.2012.00861.x			2012-10-12	2012	Interactions between fisheries and marine mammals have created costly and unresolved issues throughout the world. This study examines the spatial and resource overlaps between recolonising New Zealand sea lions, Phocarctos hookeri (Grey) (using satellite tracking) and local fisheries (using spatio-temporal catch database) on the Otago coast, New Zealand. Around Otago, spatial and resource overlap…						0	0	0	0	0969-997X		WOS:000308641000006
J	Stobart, Ben; Alvarez-Barastegui, Diego; Goni, Raquel							Effect of habitat patchiness on the catch rates of a Mediterranean coastal bottom long-line fishery						FISHERIES RESEARCH			129				110	118		10.1016/j.fishres.2012.06.014			2012-10-12	2012	Use of catch per unit effort (CPUE) as an index of abundance relies on a range of assumptions that are often not met. Variation in habitat is likely to affect catch rates of species and consequently should be taken into account when estimating abundance from CPUE data, yet this is not generally possible due to a lack of spatially detailed habitat information. Mediterranean artisanal fisheries oft…						0	0	0	0	0165-7836		WOS:000308057800014
J	Fouzai, Nadia; Coll, Marta; Palomera, Isabel; Santojanni, Alberto; Arneri, Enrico; Christensen, Villy							Fishing management scenarios to rebuild exploited resources and ecosystems of the Northern-Central Adriatic (Mediterranean Sea)						JOURNAL OF MARINE SYSTEMS			102				39	51		10.1016/j.jmarsys.2012.05.003			2012-10-12	2012	We examined various fishing management options to recover exploited marine resources and ecosystems of the Northern-Central Adriatic Sea. Dynamic simulations were based on a spatial ecological model previously calibrated with time series of data. Scenarios regarding spatial management were evaluated with the establishment of two marine protected areas, respectively, in the Pomo pit and the northe…						0	0	0	0	0924-7963		WOS:000305866200004
J	Bernardi, Giacomo; Beldade, Ricardo; Holbrook, Sally J.; Schmitt, Russell J.							Full-Sibs in Cohorts of Newly Settled Coral Reef Fishes						PLOS ONE			7	9					e44953	10.1371/journal.pone.0044953			SEP 13 2012	2012	Reef fishes exhibit a bipartite life cycle where a benthic adult stage is preceded by a pelagic dispersal phase during which larvae are presumed to be mixed and transported by oceanic currents. Genetic analyses based on twelve microsatellite loci of 181 three-spot dascyllus (Dascyllus trimaculatus) that settled concurrently on a small reef in French Polynesia revealed 11 groups of siblings (1 ful…						0	0	0	0	1932-6203		WOS:000308788700063
J	Gamez, M.; Lopez, I.; Varga, Z.; Garay, J.							Stock estimation, environmental monitoring and equilibrium control of a fish population with reserve area						REVIEWS IN FISH BIOLOGY AND FISHERIES			22	3			751	766		10.1007/s11160-012-9253-y			2012-09-12	2012	For sustainable exploitation of renewable resources, the separation of a reserve area is a natural idea. In particular, in fishery management of such systems, dynamic modelling, monitoring and control has gained major attention in recent years. In this paper, based on the known dynamic model of a fish population with reserve area, the methodology of mathematical systems theory and optimal control…						0	0	0	0	0960-3166		WOS:000307505000013
J	Young, Jock W.; McKinnon, A. David; Ceccarelli, Daniela; Brinkman, Richard; Bustamante, Rodrigo H.; Cappo, Mike; Dichmont, Cathy; Doherty, Peter; Furnas, Miles; Gledhill, Daniel; Griffiths, Shane; Hutton, Trevor; Ridgway, Ken; Smith, David; Skewes, Tim; Williams, Alan; Richardson, Anthony J.							Workshop on the ecosystem and fisheries of the Coral Sea: an Australian perspective on research and management						REVIEWS IN FISH BIOLOGY AND FISHERIES			22	3			827	834		10.1007/s11160-011-9251-5			2012-09-12	2012	This report summarizes a workshop on the Coral Sea to determine key research findings and identify the research gaps needed to support sustainable management of a proposed Coral Sea Marine Reserve. Key research questions included determining the connectivity of apex predators with the broader southwest Pacific Ocean, and assessing the regions' biodiversity in relation to seabed topography and oce…						0	0	0	0	0960-3166		WOS:000307505000019
J	Caveen, A. J.; Sweeting, C. J.; Willis, T. J.; Polunin, N. V. C.							Are the scientific foundations of temperate marine reserves too warm and hard?						ENVIRONMENTAL CONSERVATION			39	3			199	203		10.1017/S0376892912000033			2012-09-12	2012	The scientific literature (including some of the most high-profile papers) on the ecological and fisheries effects of permanent no-take marine reserves is dominated by examples from hard tropical and warm temperate ecosystems. It appears to have been tacitly assumed that inference from these studies can directly inform expectations of marine reserve effects in cooler temperate and cold temperate …						2	0	2	2	0376-8929		WOS:000308573400002
J	Kay, Matthew C.; Wilson, Jono R.							Spatially explicit mortality of California spiny lobster (Panulirus interruptus) across a marine reserve network						ENVIRONMENTAL CONSERVATION			39	3			215	224		10.1017/S0376892911000695			2012-09-12	2012	Studies of marine reserves typically focus upon differences in the size and abundance of target organisms inside versus outside reserve borders, but they seldom provide spatially explicit measurements of how reserves influence mortality rates. This study investigated mortality rates for female California spiny lobster (Panulirus interruptus) at multiple sites inside and outside of three marine re…						0	0	0	0	0376-8929		WOS:000308573400004
J	Bloomfield, H. J.; Sweeting, C. J.; Mill, A. C.; Stead, S. M.; Polunin, N. V. C.							No-trawl area impacts: perceptions, compliance and fish abundances						ENVIRONMENTAL CONSERVATION			39	3			237	247		10.1017/S0376892912000112			2012-09-12	2012	MPAs are being established worldwide at an increasing rate, however empirical evidence for benefits to mobile species of small areas closed to fishing in temperate regions are little known. Using two North Sea prohibited trawling areas (PTAs) established > 80 years ago, social (fishers' perceptions), management (fishing effort and compliance) and ecological (fish abundance and size) data were com…						0	0	0	0	0376-8929		WOS:000308573400006
J	Jones, Peter J. S.				Jones, Peter/C-3322-2008			Marine protected areas in the UK: challenges in combining top-down and bottom-up approaches to governance						ENVIRONMENTAL CONSERVATION			39	3			248	258		10.1017/S0376892912000136			2012-09-12	2012	This review outlines the policy frameworks for marine conservation zones (MCZs) and marine special areas of conservation (SACs), which are the main components of the emerging UK marine protected area (MPA) network. If current recommendations are implemented, the coverage of MPAs in English seas could rise to 27%. The governance challenges that this will raise are explored through case studies of …						0	0	0	0	0376-8929		WOS:000308573400007
J	Solano-Fernandez, Sofia; Attwood, Colin G.; Chalmers, Russell; Clark, Barry M.; Cowley, Paul D.; Fairweather, Tracey; Fennessy, Sean T.; Goetz, Albercht; Harrison, Trevor D.; Kerwath, Sven E.; Lamberth, Stephen J.; Mann, Bruce Q.; Smale, Malcolm J.; Swart, Lieze							Assessment of the effectiveness of South Africa's marine protected areas at representing ichthyofaunal communities						ENVIRONMENTAL CONSERVATION			39	3			259	270		10.1017/S0376892912000070			2012-09-12	2012	National and international policies have encouraged the establishment of a representative network of marine protected areas (MPAs) in South Africa, with the aim of protecting marine biodiversity. The extent to which these marine and estuarine protected areas (EPAs) represent marine fish species and communities was assessed by comparing their species compositions with those: of exploited areas, as…						0	0	0	0	0376-8929		WOS:000308573400008
J	Edgar, Graham J.; Barrett, Neville S.							An assessment of population responses of common inshore fishes and invertebrates following declaration of five Australian marine protected areas						ENVIRONMENTAL CONSERVATION			39	3			271	281		10.1017/S0376892912000185			2012-09-12	2012	In order to better understand community-level effects of fishing on temperate reefs at continental scales, changes in densities of common species in five Australian marine protected areas (MPAs) were estimated from prior to establishment to three years after enforcement of fishing prohibitions. A before-after-control-impact survey design was used, with 5 14 replicated sites distributed within bot…						0	0	0	0	0376-8929		WOS:000308573400009
J	Freeman, Debbie T.; Macdiarmid, Alison B.; Taylor, Richard B.; Davidson, Robert J.; Grace, Roger V.; Haggitt, Tim R.; Kelly, Shane; Shears, Nick T.							Trajectories of spiny lobster Jasus edwardsii recovery in New Zealand marine reserves: is settlement a driver?						ENVIRONMENTAL CONSERVATION			39	3			295	304		10.1017/S037689291200015X			2012-09-12	2012	Monitoring species' response in marine protected areas is important for informing both the management of those areas and the establishment of additional protected areas. Populations of spiny lobsters Jasus edwardsii were monitored in eight New Zealand marine reserves for up to 34 years. The populations displayed highly variable responses to protection. While a few showed rapid (within 1-2 years o…						0	0	0	0	0376-8929		WOS:000308573400011
J	Pulina, Manuela; Meleddu, Marta							Defining a marine protected area strategy: A stakeholder perspective						OCEAN & COASTAL MANAGEMENT			66				46	55		10.1016/j.ocecoaman.2012.05.003			2012-09-12	2012	When designing a new management strategy, it is widely acknowledged that different stakeholders' objectives are important, though their identification and satisfaction is often difficult to achieve. In this paper, a win win fishery management strategy is outlined for the Marine Protected Area of the Asinara Island, in Sardinia, one of the oldest MPA in Italy. To this aim, a discrete choice experi…						0	0	0	0	0964-5691		WOS:000308778600006
J	Wever, L.; Glaser, M.; Gorris, P.; Ferrol-Schulte, D.							Decentralization and participation in integrated coastal management: Policy lessons from Brazil and Indonesia						OCEAN & COASTAL MANAGEMENT			66				63	72		10.1016/j.ocecoaman.2012.05.001			2012-09-12	2012	Indonesia and Brazil, two large countries with long coastlines, have seen dramatic political changes over past decades. The New Constitution of 1988 in Brazil and the reform movement of 1998 in Indonesia both marked the beginning of a new political era in the respective countries. An important pillar of this was the decentralization of authority. At the same time, the notion of integrated coastal…						0	0	0	0	0964-5691		WOS:000308778600008
J	Martin, Paloma; Maynou, Francesc; Stelzenmueller, Vanessa; Sacanell, Miquel							A small-scale fishery near a rocky littoral marine reserve in the northwestern Mediterranean (Medes Islands) after two decades of fishing prohibition						SCIENTIA MARINA			76	3			607	618		10.3989/scimar.03471.07F			2012-09-12	2012	Fishing in the Medes Islands Marine Reserve (511 ha, including a no-take zone and a buffer area) was prohibited in 1983. This study is the result of a 2.5-year monitoring program (sampling on board fishing boats from June 2003 to December 2005) aimed at characterizing the small-scale fishing carried out near the reserve. A total of 109 species were identified. The various metiers in use with the …						0	0	0	0	0214-8358		WOS:000309112200019
J	Mair, James M; Cipriani, Roberto; Guzman, Hector M; Usan, David							Fishery of the Green Jack Caranx caballus (Osteichytes: Carangidae) in Las Perlas Archipelago, Pacific Panama.						Revista de biologia tropical			60	3			1271	88					2012-Sep	2012	Green Jacks, Caranx caballus, are distributed along the Eastern Pacific coast. In Panama, C. caballus was heavily fished around Las Perlas Archipelago to sustain local markets until 2007, when the archipelago was declared a marine protected area. This first study in Panama, analyzed a sample of 4 990 individuals from Las Perlas, obtained monthly from June 2005 to June 2006, from landings at the c…						0	0	0	0	0034-7744		MEDLINE:23025097
J	Jennings, Simon; Le Quesne, Will J. F.							Integration of environmental and fishery management in Europe						ICES JOURNAL OF MARINE SCIENCE			69	8			1329	1332		10.1093/icesjms/fss104			2012-09-12	2012	Policy drivers for integrating environmental and fishery management in Europe have never been so strong. Scientists calling for better integration now have the opportunity to help deliver it. The main challenge is providing relevant evidence on short time- scales using existing knowledge. Policies, scientists, and society largely agree that management targets should be linked to achieving sustain…						0	0	0	0	1054-3139		WOS:000308012200001
J	de Juan, Silvia; Moranta, Joan; Hinz, Hilmar; Barbera, Carmen; Ojeda-Martinez, Celia; Oro, Daniel; Ordines, Francisco; Olafsson, Emil; Demestre, Montserrat; Massuti, Enric; Lleonart, Jordi				Moranta, Joan/B-5522-2008			A regional network of sustainable managed areas as the way forward for the implementation of an Ecosystem-Based Fisheries Management in the Mediterranean						OCEAN & COASTAL MANAGEMENT			65				51	58		10.1016/j.ocecoaman.2012.04.024			2012-09-12	2012	In the Mediterranean there are a number of key issues that demand attention in relation to the application of Ecosystem-Based Fisheries Management. First, this region is considered a biodiversity hotspot where the pressures of human activities on ecosystems are predicted to increase. Second, fisheries in the Mediterranean, despite its significant impact, have not adopted the widely advocated ecos…						0	0	0	0	0964-5691		WOS:000306619000005
J	Gruess, Arnaud; Kaplan, David M.; Lett, Christophe				Lett, Christophe/A-2144-2010			Estimating local settler-recruit relationship parameters for complex spatially explicit models						FISHERIES RESEARCH			127				34	39		10.1016/j.fishres.2012.04.016			2012-09-12	2012	Spatially explicit models are needed to thoroughly evaluate the potential effectiveness of marine protected areas in particular locations. These models have traditionally parameterized a spatially non-varying settler-recruit relationship (SRR), which is often the large-scale, non-spatial stock-recruitment or egg-recruit relationship used for stock assessments. A recent study demonstrated that the…						0	0	0	0	0165-7836		WOS:000306626700005
J	Sand, Peter H.							'Marine protected areas' off UK overseas territories: comparing the South Orkneys Shelf and the Chagos Archipelago			3			GEOGRAPHICAL JOURNAL			178				201	207					2012-09-12	2012	In the wake of the designation of two new marine protected areas adjacent to the coastal waters of the South Orkney Islands (British Antarctic Territory) and the Chagos Archipelago (British Indian Ocean Territory), this commentary considers some of the geographical, legal and political implications of these unilateral declarations taking into account competing claims of jurisdiction by Mauritius …						0	0	0	0	0016-7398		CCC:000307013100002
J	Marzoug, Douniazed; Boutiba, Zitouni; Kostadinova, Aneta; Perez-del-Olmo, Ana							Effects of fishing on parasitism in a sparid fish: Contrasts between two areas of the Western Mediterranean						PARASITOLOGY INTERNATIONAL			61	3			414	420		10.1016/j.parint.2012.02.002			2012-09-12	2012	This study addressed the impacts of fishing on the rates of parasitism using the sparid Boops boops as a model fish species. Using a large suite of parasite species in B. boops, with different life histories, transmission pathways and host specificity, we compared parasite diversity, prevalence, abundance and community structure at two Mediterranean localities in the Balearic Sea, Santa Pola Bay …						0	0	0	0	1383-5769		WOS:000305501900005
J	Fenberg, Phillip B.; Caselle, Jennifer E.; Claudet, Joachim; Clemence, Michaela; Gaines, Steven D.; Antonio Garcia-Charton, Jose; Goncalves, Emanuel J.; Grorud-Colvert, Kirsten; Guidetti, Paolo; Jenkins, Stuart R.; Jones, Peter J. S.; Lester, Sarah E.; McAllen, Rob; Moland, Even; Planes, Serge; Sorensen, Thomas K.				Claudet, Joachim/C-6335-2008; Jones, Peter/C-3322-2008			The science of European marine reserves: Status, efficacy, and future needs						MARINE POLICY			36	5			1012	1021					2012-09-12	2012	The ecologically and socio-economically important marine ecosystems of Europe are facing severe threats from a variety of human impacts. To mitigate and potentially reverse some of these impacts, the European Union (EU) has mandated the implementation of the Marine Strategy Framework Directive (MSFD) in order to achieve Good Environmental Status (GES) in EU waters by 2020. The primary initiative …						1	0	1	1	0308-597X		CCC:000305105800009
J	Mason, Janet; Kosaka, Rosemary; Mamula, Aaron; Speir, Cameron							Effort changes around a marine reserve: The case of the California Rockfish Conservation Area						MARINE POLICY			36	5			1054	1063					2012-09-12	2012	This article is an analysis of observed changes in the level of fishing effort and the spatial distribution of fishing effort following implementation of a marine reserve off the California coast. The Rockfish Conservation Area (RCA) closes the area between depth contour based boundaries to commercial trawl fishing. In this analysis, commercial fishing vessels are grouped based on their level of …						0	0	0	0	0308-597X		CCC:000305105800014
J	Kearney, R.; Buxton, C. D.; Farebrother, G.							Australia's no-take marine protected areas: Appropriate conservation or inappropriate management of fishing?						MARINE POLICY			36	5			1064	1071					2012-09-12	2012	The absence of properly identified mechanisms to adequately protect the marine environment remains a major shortcoming in Australia's commitment to biodiversity conservation. The current commitment to a National Representative System of Marine Protected Areas (NRSMPA) falls far short of providing adequate protection against the suite of existing and potential threats even though areas are designa…						0	0	0	0	0308-597X		CCC:000305105800015
J	Fox, Helen E.; Soltanoff, Carrie S.; Mascia, Michael B.; Haisfield, Kelly M.; Lombana, Alfonso V.; Pyke, Christopher R.; Wood, Louisa							Explaining global patterns and trends in marine protected area (MPA) development						MARINE POLICY			36	5			1131	1138					2012-09-12	2012	The relative paucity and heterogeneous distribution of marine protected areas (MPAs) indicates the need for better understanding of factors that foster MPA establishment at local, sub-national, and national levels. The relationship between national-level MPA establishment and geographic, ecological, social, and political factors that may drive patterns and trends in MPA establishment were assesse…						0	0	0	0	0308-597X		CCC:000305105800022
J	Seiler, Jan; Friedman, Ariell; Steinberg, Daniel; Barrett, Neville; Williams, Alan; Holbrook, Neil J.							Image-based continental shelf habitat mapping using novel automated data extraction techniques						CONTINENTAL SHELF RESEARCH			45				87	97		10.1016/j.csr.2012.06.003			AUG 15 2012	2012	We automatically mapped the distribution of temperate continental shelf rocky reef habitats with a high degree of confidence using colour, texture, rugosity and patchiness features extracted from images in conjunction with machine-learning algorithms. This demonstrated the potential of novel automation routines to expedite the complex and time-consuming process of seabed mapping. The random fores…						0	0	0	0	0278-4343		WOS:000308899500009
J	Miller, Ian; Cheal, Alistair J.; Emslie, Michael J.; Logan, Murray; Sweatman, Hugh							Ongoing effects of no-take marine reserves on commercially exploited coral trout populations on the Great Barrier Reef						MARINE ENVIRONMENTAL RESEARCH			79				167	170		10.1016/j.marenvres.2012.05.008			2012-08-12	2012	Networks of no-take marine reserves (NTMRs) are widely used for managing marine resources. Because they restrict fishing, managers need to monitor reserves to reassure stakeholders that they are achieving the intended results. In 2004, the Great Barrier Reef (GBR) Marine Park was rezoned and the area of NTMRs was greatly increased. Using manta tow we assessed the effectiveness of the new NTMRs in…						0	0	0	0	0141-1136		WOS:000307094000019
J	Alos, J.; Cabanellas-Reboredo, M.							Experimental acoustic telemetry experiment reveals strong site fidelity during the sexual resting period of wild brown meagre, Sciaena umbra						JOURNAL OF APPLIED ICHTHYOLOGY			28	4			606	611		10.1111/j.1439-0426.2012.01955.x			2012-08-12	2012	The spatial and temporal patterns exhibited by wild brown meagre, Sciaena umbra, during the sexual resting period were determined using an array of omnidirectional acoustic receivers. In mid-October 2010, four individuals were tagged using internal acoustic tags and released into their natural habitat. Fish were monitored for up to 70 days within the array of the acoustic receivers. The results p…						0	0	0	0	0175-8659		WOS:000306142900017
J	Horigue, Vera; Alino, Porfirio M.; White, Alan T.; Pressey, Robert L.							Marine protected area networks in the Philippines: Trends and challenges for establishment and governance						OCEAN & COASTAL MANAGEMENT			64				15	26		10.1016/j.ocecoaman.2012.04.012			2012-08-12	2012	Marine protected areas (MPAs) are the most extensively implemented fisheries management and conservation tool in the Philippines. Most MPAs have been established and managed by communities together with local governments in a variety of community-based and co-management schemes. This approach has proven successful in gaining community acceptance and achieving local-scale fisheries and conservatio…						0	0	0	0	0964-5691		WOS:000305723800002
J	Smallwood, Claire B.; Beckley, Lynnath E.							Spatial distribution and zoning compliance of recreational fishing in Ningaloo Marine Park, north-western Australia						FISHERIES RESEARCH			125				40	50		10.1016/j.fishres.2012.01.019			2012-08-12	2012	Recreational fishing is often permitted in multiple-use marine parks and, to ensure a balance with biodiversity conservation, sanctuary (no-take) zones are frequently demarcated. However, compliance with such measures is rarely quantified. Aerial and land-based coastal observation surveys were conducted within Ningaloo Marine Park, north-western Australia, with the aim of identifying the spatio-t…						1	0	0	1	0165-7836		WOS:000304849100005
J	Knip, Danielle M.; Heupel, Michelle R.; Simpfendorfer, Colin A.				Simpfendorfer, Colin/G-9681-2011			Mortality rates for two shark species occupying a shared coastal environment						FISHERIES RESEARCH			125				184	189		10.1016/j.fishres.2012.02.023			2012-08-12	2012	Mortality plays a crucial role in the dynamics of all shark populations. However, our understanding of mortality and the factors that affect survival in wild populations remains limited, particularly for adult sharks. Long-term acoustic monitoring data were used to estimate mortality rates for juvenile pigeye (Carcharhinus amboinensis) and adult spottail (Carcharhinus sorrah) sharks within the sa…						0	0	0	0	0165-7836		WOS:000304849100019
J	Chae, Dong-Ryul; Wattage, Premachandra; Pascoe, Sean				Pascoe, Sean/D-9710-2011			Recreational benefits from a marine protected area: A travel cost analysis of Lundy						TOURISM MANAGEMENT			33	4			971	977					2012-08-12	2012	Marine Protected Areas (MPAs) have been proposed in many countries as a means of conserving parts of the marine environment. In some cases, MPAs may also confer recreational benefits. In this paper, a travel cost model is used to estimate the non-market recreational benefits arising from the Lundy Island Marine Nature Reserve (MNR). The estimated mean consumer surplus for visiting Lundy was found…						0	0	0	0	0261-5177		CCC:000301309500022
J	Dorman, Stacey R.; Harvey, Euan S.; Newman, Stephen J.							Bait Effects in Sampling Coral Reef Fish Assemblages with Stereo-BRUVs						PLOS ONE			7	7					e41538	10.1371/journal.pone.0041538			JUL 27 2012	2012	Baited underwater video techniques are increasingly being utilised for assessing and monitoring demersal fishes because they are: 1) non extractive, 2) can be used to sample across multiple habitats and depths, 3) are cost effective, 4) sample a broader range of species than many other techniques, 5) and with greater statistical power. However, an examination of the literature demonstrates that a…						0	0	0	0	1932-6203		WOS:000306950200069
J	Nogueira Junior, Miodeli							Gelatinous zooplankton fauna (Cnidaria, Ctenophora and Thaliacea) from Baia da Babitonga (southern Brazil)						ZOOTAXA				3398			1	21					JUL 24 2012	2012	The present study reports on a survey of the gelatinous zooplankton fauna (Cnidaria, Ctenophora and Thaliacea) from the proposed Baia da Babitonga marine protected area (southern Brazil; similar to 26 degrees S), based on collections from multiple sites over different seasons and from published literature. In order to sample both small and large gelatinous animals, plankton hauls (n = 255) and fi…						0	0	0	0	1175-5326		WOS:000306661600001
J	Micheli, Fiorenza; Saenz-Arroyo, Andrea; Greenley, Ashley; Vazquez, Leonardo; Espinoza Montes, Jose Antonio; Rossetto, Marisa; De Leo, Giulio A.							Evidence That Marine Reserves Enhance Resilience to Climatic Impacts						PLOS ONE			7	7					e40832	10.1371/journal.pone.0040832			JUL 18 2012	2012	Establishment of marine protected areas, including fully protected marine reserves, is one of the few management tools available for local communities to combat the deleterious effect of large scale environmental impacts, including global climate change, on ocean ecosystems. Despite the common hope that reserves play this role, empirical evidence of the effectiveness of local protection against g…						0	0	0	0	1932-6203		WOS:000306548900054
J	Rassweiler, Andrew; Costello, Christopher; Siegel, David A.							Marine protected areas and the value of spatially optimized fishery management						PROCEEDINGS OF THE NATIONAL ACADEMY OF SCIENCES OF THE UNITED STATES OF AMERICA			109	29			11884	11889		10.1073/pnas.1116193109			JUL 17 2012	2012	There is a growing focus around the world on marine spatial planning, including spatial fisheries management. Some spatial management approaches are quite blunt, as when marine protected areas (MPAs) are established to restrict fishing in specific locations. Other management tools, such as zoning or spatial user rights, will affect the distribution of fishing effort in a more nuanced manner. Cons…						0	0	0	0	0027-8424		WOS:000306837100078
J	Comeros-Raynal, Mia T.; Choat, John Howard; Polidoro, Beth A.; Clements, Kendall D.; Abesamis, Rene; Craig, Matthew T.; Lazuardi, Muhammad Erdi; McIlwain, Jennifer; Muljadi, Andreas; Myers, Robert F.; Nanola, Cleto L., Jr.; Pardede, Shinta; Rocha, Luiz A.; Russell, Barry; Sanciangco, Jonnell C.; Stockwell, Brian; Harwell, Heather; Carpenter, Kent E.				Rocha, Luiz/C-5107-2011			The Likelihood of Extinction of Iconic and Dominant Herbivores and Detritivores of Coral Reefs: The Parrotfishes and Surgeonfishes						PLOS ONE			7	7					e39825	10.1371/journal.pone.0039825			JUL 11 2012	2012	Parrotfishes and surgeonfishes perform important functional roles in the dynamics of coral reef systems. This is a consequence of their varied feeding behaviors ranging from targeted consumption of living plant material (primarily surgeonfishes) to feeding on detrital aggregates that are either scraped from the reef surface or excavated from the deeper reef substratum (primarily parrotfishes). In…						0	0	0	0	1932-6203		WOS:000306362400022
J	Berkstrom, Charlotte; Gullstrom, Martin; Lindborg, Regina; Mwandya, Augustine W.; Yahya, Saleh A. S.; Kautsky, Nils; Nystrom, Magnus							Exploring 'knowns' and 'unknowns' in tropical seascape connectivity with insights from East African coral reefs						ESTUARINE COASTAL AND SHELF SCIENCE			107				1	21		10.1016/j.ecss.2012.03.020			JUL 10 2012	2012	Applying a broader landscape perspective to understand spatio-temporal changes in local populations and communities has been increasingly used in terrestrial systems to study effects of human impact and land use change. With today's major declines in fishery stocks and rapid degradation of natural coastal habitats, the understanding of habitat configuration and connectivity over relevant temporal…						1	0	1	1	0272-7714		WOS:000306633900001
J	Guizien, K.; Belharet, M.; Marsaleix, P.; Guarinia, J. M.							Using larval dispersal simulations for marine protected area design: Application to the Gulf of Lions (northwest Mediterranean)						LIMNOLOGY AND OCEANOGRAPHY			57	4			1099	1112		10.4319/lo.2012.57.4.1099			2012-07-12	2012	The design (location and size) of sustaining, no-take reserves was investigated by combining realistic numerical simulations of larval dispersal from a sedentary marine species with a population dynamics model. The method explored, a priori: (1) the planktonic larval duration (PLD) of self-persistent populations within no-take reserves with radii from 1 to 20 km, (2) the size of a no-take reserve…						0	0	0	0	0024-3590		WOS:000307269300016
J	[Anonymous]							More evidence that marine reserves enhance nearby fisheries						MARINE POLLUTION BULLETIN			64	7			1275	1276					2012-07-12	2012							0	0	0	0	0025-326X		WOS:000307143000014
J	Olsen, Esben Moland; Heupel, Michelle R; Simpfendorfer, Colin A; Moland, Even							Harvest selection on Atlantic cod behavioral traits: implications for spatial management.						Ecology and evolution			2	7			1549	62					2012-Jul	2012	Harvesting wild populations may contrast or reinforce natural agents of selection and potentially cause evolutionary changes in life-history traits such as growth and maturation. Harvest selection may also act on behavioral traits, although this field of research has so far received less attention. We used acoustic tags and a network of receivers to monitor the behavior and fate of individual Atl…						0	0	0	0	2045-7758		MEDLINE:22957161
J	Ruiz-Lopez, Dulce M.; Aragon-Noriega, Alberto E.; Luna-Gonzalez, Antonio; Gonzalez-Ocampo, Hector A.							Applying Fuzzy Logic to Assess Human Perception in Relation to Conservation Plan Efficiency Measures Within a Biosphere Reserve						AMBIO			41	5			467	478		10.1007/s13280-012-0252-y			2012-07-12	2012	The objective of this study is to present an efficiency-perception impact assessment based upon the integration of fuzzy logic (FL) of the "Productive Reconversion" conservation program (PRP) instituted by the Mexican government, in the upper Gulf of California and the Colorado Delta Biosphere Reserve. This approach enables environmental analysts to deal with the intrinsic imprecision and ambigui…						0	0	0	0	0044-7447		WOS:000306121200005
J	Hintz, William D.; Garvey, James E.							Considering a species-loss domino-effect before endangered species legislation and protected area implementation						BIODIVERSITY AND CONSERVATION			21	8			2017	2027		10.1007/s10531-012-0293-3			2012-07-12	2012	Regulatory legislation by governments is essential for facilitating the recovery of endangered or threatened species. Protecting commercially exploited species, in particular, requires painstaking cooperation among vested parties. However, rules protecting one species may be detrimental to others. If an exploited species is only protected in a portion of its range, exploitative efforts may divert…						0	0	0	0	0960-3115		WOS:000305228400008
J	Houk, Peter; Benavente, David; Fread, Vanessa							Characterization and evaluation of coral reefs around Yap Proper, Federated States of Micronesia						BIODIVERSITY AND CONSERVATION			21	8			2045	2059		10.1007/s10531-012-0296-0			2012-07-12	2012	This study addresses the coupled themes of science and conservation by characterizing and evaluating the coral reefs around Yap, Federated States of Micronesia. Reef types, and the inherent environmental regimes they constitute, were found to be good predictors of distinct modern assemblages, with minimally overlapping species occurrences. Corals from inner and channel reefs were twice as large a…						0	0	0	0	0960-3115		WOS:000305228400010
J	Takashina, Nao; Mougi, Akihiko; Iwasa, Yoh							Paradox of marine protected areas: suppression of fishing may cause species loss						POPULATION ECOLOGY			54	3			475	485		10.1007/s10144-012-0323-8			2012-07-12	2012	A number of fish and invertebrate stocks have been depleted by overexploitation in recent years. To address this, marine protected areas (MPAs) are often established to protect biodiversity and recover stocks. We analyzed the potential impact of establishing MPAs on marine ecosystems using mathematical models. We demonstrate that establishment of an MPA can sometimes result in a considerable decl…						0	0	0	0	1438-3896		WOS:000305688400012
J	Jennings, S.; Lee, J.; Hiddink, J. G.				Jennings, Simon/F-5085-2012; Hiddink, Jan Geert/C-1238-2009			Assessing fishery footprints and the trade-offs between landings value, habitat sensitivity, and fishing impacts to inform marine spatial planning and an ecosystem approach						ICES JOURNAL OF MARINE SCIENCE			69	6			1053	1063		10.1093/icesjms/fss050			2012-07-12	2012	European and national policy commitments require further integration of fisheries and environmental management. We measured fishery footprints and assessed trade-offs between landings value, habitat sensitivity, and beam trawling impacts in UK territorial waters in the southern and central North Sea where marine spatial planning is underway and a network of Marine Protected Areas has been propose…						0	0	0	0	1054-3139		WOS:000305461200014
J	de Juan, S.; Demestre, M.							A Trawl Disturbance Indicator to quantify large scale fishing impact on benthic ecosystems						ECOLOGICAL INDICATORS			18				183	190		10.1016/j.ecolind.2011.11.020			2012-07-12	2012	We evaluated the adequacy of an indicator of benthic community health to assess trawling disturbance by sampling epifauna at 6 sites subjected to variable fishing intensity in the Mediterranean: from no fishing, in an area associated to a marine reserve, to high fishing intensity, in trawling grounds. The proposed indicator is based on the biological traits composition of epifaunal species that d…						0	0	0	0	1470-160X		WOS:000303284500022
J	Cabrera, R.; Valero-Franco, C.; Piniella, F.; Diaz, C.; Gomez-Cama, M. C.; Soriguer, M. C.; Hernando, J. A.							A software tool for monitoring legal minimum length of landings: Case study of a fishery in southern Spain						MARINE POLICY			36	4			895	902					2012-07-12	2012	The regulation of minimum legal size (MLS) of catches is a tool widely applied in the management of fisheries resources, although the MLS does not always coincide with the length at first maturity (LFM). The optimization of this management tool requires a series of quality control in fish markets and transportation. A software application has been developed to make the control of the landings of …						0	0	0	0	0308-597X		CCC:000302042700005
J	Warner, Tammy E.; Pomeroy, Robert S.							Creating compliance: A cross-sectional study of the factors associated with marine protected area outcomes						MARINE POLICY			36	4			922	932					2012-07-12	2012	A model for the economics of marine conservation is developed and tested using data from a global sample of Marine Protected Areas (MPAs). Results from logistic regressions indicate that significant determinants of positive MPA effects vary among MPA subgroups. These significant regressors include enforcement in later time periods and certain "goodwill building activities" carried out by MPA mana…						1	0	0	1	0308-597X		CCC:000302042700009
J	Taylor, Brett M.; McIlwain, Jennifer L.; Kerr, Alexander M.							Marine Reserves and Reproductive Biomass: A Case Study of a Heavily Targeted Reef Fish						PLOS ONE			7	6					e39599	10.1371/journal.pone.0039599			JUN 26 2012	2012	Recruitment overfishing (the reduction of a spawning stock past a point at which the stock can no longer replenish itself) is a common problem which can lead to a rapid and irreversible fishery collapse. Averting this disaster requires maintaining a sufficient spawning population to buffer stochastic fluctuations in recruitment of heavily harvested stocks. Optimal strategies for managing spawner …						0	0	0	0	1932-6203		WOS:000305808700037
J	Fitzpatrick, Ben M.; Harvey, Euan S.; Heyward, Andrew J.; Twiggs, Emily J.; Colquhoun, Jamie				Harvey, Euan/B-2896-2011			Habitat Specialization in Tropical Continental Shelf Demersal Fish Assemblages						PLOS ONE			7	6					e39634	10.1371/journal.pone.0039634			JUN 25 2012	2012	The implications of shallow water impacts such as fishing and climate change on fish assemblages are generally considered in isolation from the distribution and abundance of these fish assemblages in adjacent deeper waters. We investigate the abundance and length of demersal fish assemblages across a section of tropical continental shelf at Ningaloo Reef, Western Australia, to identify fish and f…						0	0	0	0	1932-6203		WOS:000305781700054
J	Bruce, Thiago; Meirelles, Pedro M.; Garcia, Gizele; Paranhos, Rodolfo; Rezende, Carlos E.; de Moura, Rodrigo L.; Filho, Ronaldo-Francini; Coni, Ericka O. C.; Vasconcelos, Ana Tereza; Amado Filho, Gilberto; Hatay, Mark; Schmieder, Robert; Edwards, Robert; Dinsdale, Elizabeth; Thompson, Fabiano L.				Vasconcelos, Ana Tereza/I-1011-2012; AMADO FILHO, GILBERTO/I-1324-2012			Abrolhos Bank Reef Health Evaluated by Means of Water Quality, Microbial Diversity, Benthic Cover, and Fish Biomass Data						PLOS ONE			7	6					e36687	10.1371/journal.pone.0036687			JUN 5 2012	2012	The health of the coral reefs of the Abrolhos Bank (southwestern Atlantic) was characterized with a holistic approach using measurements of four ecosystem components: (i) inorganic and organic nutrient concentrations, [1] fish biomass, [1] macroalgal and coral cover and (iv) microbial community composition and abundance. The possible benefits of protection from fishing were particularly evaluated…						0	0	0	0	1932-6203		WOS:000305343900001
J	Harrison, Hugo B.; Williamson, David H.; Evans, Richard D.; Almany, Glenn R.; Thorrold, Simon R.; Russ, Garry R.; Feldheim, Kevin A.; van Herwerden, Lynne; Planes, Serge; Srinivasan, Maya; Berumen, Michael L.; Jones, Geoffrey P.				jones, geoffrey/E-9306-2010; Thorrold, Simon/B-7565-2012; Harrison, Hugo/F-6830-2012; van Herwerden, Lynne/I-1087-2012			Larval Export from Marine Reserves and the Recruitment Benefit for Fish and Fisheries						CURRENT BIOLOGY			22	11			1023	1028		10.1016/j.cub.2012.04.008			JUN 5 2012	2012	Marine reserves, areas closed to all forms of fishing, continue to be advocated and implemented to supplement fisheries and conserve populations [1-4]. However, although the reproductive potential of important fishery species can dramatically increase inside reserves [5-8], the extent to which larval offspring are exported and the relative contribution of reserves to recruitment in fished and pro…						1	0	0	1	0960-9822		WOS:000305034900026
J	Roberts, Callum							Marine Ecology: Reserves Do Have a Key Role in Fisheries						CURRENT BIOLOGY			22	11			R444	R446		10.1016/j.cub.2012.04.030			JUN 5 2012	2012							0	0	0	0	0960-9822		WOS:000305034900009
J	Nagelkerken, Ivan; Grol, Monique G. G.; Mumby, Peter J.				Mumby, Peter/F-9914-2010			Effects of Marine Reserves versus Nursery Habitat Availability on Structure of Reef Fish Communities						PLOS ONE			7	6					e36906	10.1371/journal.pone.0036906			JUN 4 2012	2012	No-take marine fishery reserves sustain commercial stocks by acting as buffers against overexploitation and enhancing fishery catches in adjacent areas through spillover. Likewise, nursery habitats such as mangroves enhance populations of some species in adjacent habitats. However, there is lack of understanding of the magnitude of stock enhancement and the effects on community structure when bot…						0	0	0	0	1932-6203		WOS:000305341700008
J	Ling, S. D.; Johnson, C. R.							Marine reserves reduce risk of climate-driven phase shift by reinstating size- and habitat-specific trophic interactions						ECOLOGICAL APPLICATIONS			22	4			1232	1245					2012-06-12	2012	Spatial closures in the marine environment are widely accepted as effective conservation and fisheries management tools. Given increasing human-derived stressors acting on marine ecosystems, the need for such effective action is urgently clear. Here we explore mechanisms underlying the utility of marine reserves to reinstate trophic dynamics and to increase resilience of kelp beds against climate…						2	0	0	2	1051-0761		WOS:000305836600014
J	Klein, Carissa J.; Jupiter, Stacy D.; Selig, Elizabeth R.; Watts, Matthew E.; Halpern, Benjamin S.; Kamal, Muhammad; Roelfsema, Chris; Possingham, Hugh P.							Forest conservation delivers highly variable coral reef conservation outcomes						ECOLOGICAL APPLICATIONS			22	4			1246	1256					2012-06-12	2012	Coral reefs are threatened by human activities on both the land (e. g., deforestation) and the sea (e. g., overfishing). Most conservation planning for coral reefs focuses on removing threats in the sea, neglecting management actions on the land. A more integrated approach to coral reef conservation, inclusive of land-sea connections, requires an understanding of how and where terrestrial conserv…						0	0	0	0	1051-0761		WOS:000305836600015
J	Wilkinson, Clive; Salvat, Bernard							Coastal resource degradation in the tropics: Does the tragedy of the commons apply for coral reefs, mangrove forests and seagrass beds						MARINE POLLUTION BULLETIN			64	6			1096	1105		10.1016/j.marpolbul.2012.01.041			2012-06-12	2012	The keynote paper by Garrett Hardin 44 years ago introduced the term 'tragedy of the commons' into our language (Hardin, 1968); this term is now used widely, but it is neither universally accepted nor fully understood. Irrespective, the 'tragedy of the commons' is an increasing reality for more than 500 million people that rely on the biodiversity resources and services of tropical coral reefs, m…						0	0	0	0	0025-326X		WOS:000306032700016
J	Brodie, Jon; Waterhouse, Jane							A critical review of environmental management of the 'not so Great' Barrier Reef						ESTUARINE COASTAL AND SHELF SCIENCE			104				1	22		10.1016/j.ecss.2012.03.012			JUN 1 2012	2012	Recent estimates put average coral cover across the Great Barrier Reef (GBR) at about 20-30%. This is estimated to be a large reduction since the 1960s. The Great Barrier Reef Marine Park Act was enacted in 1975 and the Great Barrier Reef Marine Park Authority (GBRMPA) set up shortly afterwards. So the question is: why has coral cover continued to decline when the GBR is being managed with a mana…						1	0	1	1	0272-7714		WOS:000305381200001
J	Dalton, Tracey; Forrester, Graham; Pollnac, Richard							Participation, Process Quality, and Performance of Marine Protected Areas in the Wider Caribbean						ENVIRONMENTAL MANAGEMENT			49	6			1224	1237		10.1007/s00267-012-9855-0			2012-06-12	2012	Throughout the wider Caribbean, marine protected areas (MPAs) are rapidly gaining momentum as a conservation tool, but management performance of existing MPAs is considered low. To enhance MPA management performance, stakeholders are increasingly being invited to discuss, debate, and develop rules about how people should interact with marine ecosystems. Using social and ecological data from a rap…						0	0	0	0	0364-152X		WOS:000304623200010
J	Di Ciommo, Regina C.; Schiavetti, Alexandre							Women participation in the management of a Marine Protected Area in Brazil						OCEAN & COASTAL MANAGEMENT			62				15	23		10.1016/j.ocecoaman.2012.02.010			2012-06-12	2012	The Marine Extractive Reserve Corumbau, a MPA unit, was created for the sustainable use of fishing resources. The exclusive right over resources requires that its population of fishermen and fisherwomen have consistent and equitable participation in the decision-making for an effective co-management. This research considers the importance of incorporating women's experiences and knowledge in the …						0	0	0	0	0964-5691		WOS:000304894500003
J	Ling, Scott D.; Johnson, Craig R.; Mundy, Craig N.; Morris, Alice; Ross, D. Jeff				Ross, Donald/F-7607-2012			Hotspots of exotic free-spawning sex: man-made environment facilitates success of an invasive seastar						JOURNAL OF APPLIED ECOLOGY			49	3			733	741		10.1111/j.1365-2664.2012.02133.x			2012-06-12	2012	1. The introduction of exotic species to new areas poses a major threat to the environment. For those introduced species that establish and survive beyond the short term, the opportunities to manage the risk of continuing spread often rest with limiting reproductive output. The introduced northern Pacific seastar Asterias amurensis is an ecologically important pest that has established in the Der…						0	0	0	0	0021-8901		WOS:000304660500024
J	Ayers, Cheri A.; Dearden, Phil; Rollins, Rick							An exploration of Hul'qumi'num Coast Salish peoples' attitudes towards the establishment of no-take zones within marine protected areas in the Salish Sea, Canada						CANADIAN GEOGRAPHER-GEOGRAPHE CANADIEN			56	2			260	274					SUM 2012	2012	The Canadian Government has committed to establishing a national network of Marine Protected Areas. Progress in the Salish Sea (Strait of Georgia) of British Columbia has been slow. Opposition by First Nations is a factor as these protected areas have the potential to impact on Aboriginal rights. This case study with the Hulquminum First Nations examines their approaches to marine conservation an…						0	0	0	0	1958-08-01		CCC:000304599700008
J	Hui, Min; Kochzius, Marc; Leese, Florian							Isolation and characterisation of nine microsatellite markers in the boring giant clam (Tridacna crocea) and cross-amplification in five other tridacnid species						MARINE BIODIVERSITY			42	2			285	287		10.1007/s12526-011-0101-4			2012-06-12	2012	Nine novel polymorphic microsatellite markers were isolated in the boring giant clam (Tridacna crocea). The number of alleles ranged from 7 to 21. The observed and expected heterozygosity varied from 0.400 to 1.000 and 0.727 to 0.932, respectively. No significant linkage disequilibrium between pairs of loci was found and eight of nine loci were in Hardy-Weinberg proportions. Cross-amplification i…						0	0	0	0	1867-1616		WOS:000304098000015
J	Jupiter, S. D.; Weeks, R.; Jenkins, A. P.; Egli, D. P.; Cakacaka, A.							Effects of a single intensive harvest event on fish populations inside a customary marine closure						CORAL REEFS			31	2			321	334		10.1007/s00338-012-0888-x			2012-06-12	2012	In September 2008, the villagers of Kia Island, Fiji, opened their customary managed closure (Cakaulevu tabu) to fishing for a fundraiser that lasted for 5 weeks. We report on opportunistic before-after-control-impact surveys describing changes to coral reef communities both 4 weeks into the harvest and 1 year later compared with pre-harvest conditions. Prior to the harvest, there was a gradient …						0	0	0	0	0722-4028		WOS:000303450100002
J	Rhodes, K. L.; McIlwain, J.; Joseph, E.; Nemeth, R. S.							Reproductive movement, residency and fisheries vulnerability of brown-marbled grouper, Epinephelus fuscoguttatus (ForsskAyenl, 1775)						CORAL REEFS			31	2			443	453		10.1007/s00338-012-0875-2			2012-06-12	2012	The brown-marbled grouper, Epinephelus fuscoguttatus, is a long-lived, late-maturing protogynous species listed as Near Threatened by the IUCN. In Pohnpei, Micronesia, reproductively active brown-marbled grouper were tagged with acoustic and spaghetti-type tags at a multi-species fish spawning aggregation (FSA) site to establish patterns of movement, residency and seasonality. Telemetry confirmed…						0	0	0	0	0722-4028		WOS:000303450100015
J	Yasue, M.; Nellas, A.; Vincent, A. C. J.							Seahorses helped drive creation of marine protected areas, so what did these protected areas do for the seahorses?						ENVIRONMENTAL CONSERVATION			39	2			183	193		10.1017/S0376892911000622			2012-06-12	2012	In marine environments, charismatic or economically valued taxa have been used as flagships to garner local support or international funds for the establishment and management of marine protected areas (MPAs). Seahorses (Hippocampus spp.) are frequently used as flagship species to help engender support for the creation of small community-managed no-take MPAs in the central Philippines. It is thus…						0	0	0	0	0376-8929		WOS:000303605800009
J	Bottema, Mariska J. M.; Bush, Simon R.							The durability of private sector-led marine conservation: A case study of two entrepreneurial marine protected areas in Indonesia						OCEAN & COASTAL MANAGEMENT			61				38	48		10.1016/j.ocecoaman.2012.01.004			2012-06-12	2012	This paper investigates the durability of entrepreneurial marine protected areas (EMPAs) by exploring the role of the private sector in marine conservation. Set within a wider set of social science questions around the marine protected areas as negotiated interventions, we focus on whether and how tourism entrepreneurs can instill a long-term vision for marine conservation, funding and management…						0	0	0	0	0964-5691		WOS:000303429300006
J	Dowling, Natalie A.; Wilcox, Chris; Mangel, Marc; Pascoe, Sean				Pascoe, Sean/D-9710-2011			Assessing opportunity and relocation costs of marine protected areas using a behavioural model of longline fleet dynamics						FISH AND FISHERIES			13	2			139	157		10.1111/j.1467-2979.2011.00422.x			2012-06-12	2012	Increasing use of spatial management tools in fisheries requires an understanding of fleet response, and in particular to where displaced fishing effort is likely to move. We develop a state-dependent decision-making model to address the spatial allocation of effort in an Australian tuna longline fishery. We assume that fishers have an economic objective in deciding where to fish, but that decisi…						0	0	0	0	1467-2960		WOS:000302610400002
J	Barnett, Adam; Abrantes, Katya G.; Seymour, Jamie; Fitzpatrick, Richard							Residency and Spatial Use by Reef Sharks of an Isolated Seamount and Its Implications for Conservation						PLOS ONE			7	5	1				e36574	10.1371/journal.pone.0036574			MAY 16 2012	2012	Although marine protected areas (MPAs) are a common conservation strategy, these areas are often designed with little prior knowledge of the spatial behaviour of the species they are designed to protect. Currently, the Coral Sea area and its seamounts (north-east Australia) are under review to determine if MPAs are warranted. The protection of sharks at these seamounts should be an integral compo…						0	0	0	0	1932-6203		WOS:000305341300019
J	Christou, Cameron N.; Idels, Lev V.							BIOECONOMICAL RICKER'S MODEL OF MARINE PROTECTED AREAS						ELECTRONIC JOURNAL OF DIFFERENTIAL EQUATIONS									76				MAY 14 2012	2012	Marine protected areas (MPA) become part of modern fishery management to safeguard marine life and sustain ecosystem processes. Based on a classical Ricker's model, the deterministic nonlinear sink-source model of MPA is presented. Sufficient conditions for the existence of positive bounded steady-states are obtained. The present value of net revenue is maximized subject to population dynamics in…						0	0	0	0	1072-6691		WOS:000305139800003
J	Louzao, Maite; Delord, Karine; Garcia, David; Boue, Amelie; Weimerskirch, Henri							Protecting Persistent Dynamic Oceanographic Features: Transboundary Conservation Efforts Are Needed for the Critically Endangered Balearic Shearwater						PLOS ONE			7	5					e35728	10.1371/journal.pone.0035728			MAY 10 2012	2012	The protection of key areas for biodiversity at sea is not as widespread as on land and research investment is necessary to identify biodiversity hotspots in the open ocean. Spatially explicit conservation measures such as the creation of representative networks of marine protected areas (MPAs) is a critical step towards the conservation and management of marine ecosystems, as well as to improve …						0	0	0	0	1932-6203		WOS:000305336400006
J	Colleter, Mathieu; Gascuel, Didier; Ecoutin, Jean-Marc; de Morais, Luis Tito				Gascuel, Didier/C-1439-2011			Modelling trophic flows in ecosystems to assess the efficiency of marine protected area (MPA), a case study on the coast of Senegal						ECOLOGICAL MODELLING			232				1	13		10.1016/j.ecolmodel.2012.01.019			MAY 10 2012	2012	Marine protected areas (MPAs) are now viewed as an efficient tool to fight against the global deterioration of habitats and fish populations. However their efficiency and effects on the whole trophic network are little known. Based on the Bolong de Bamboung (Senegal) case study, the objective of this study is to assess the impact of a MPA on the entire trophic network using trophodynamic models. …						0	0	0	0	0304-3800		WOS:000303424900002
J	Hicks, Christina C.; McClanahan, Timothy R.							Assessing Gear Modifications Needed to Optimize Yields in a Heavily Exploited, Multi-Species, Seagrass and Coral Reef Fishery						PLOS ONE			7	5					e36022	10.1371/journal.pone.0036022			MAY 4 2012	2012	Effective management is necessary if small-scale fisheries, such as those found in mixed habitats including seagrass and coral reefs, are to continue providing food for many of the poorest communities of the world. Gear-based management, although under represented and under studied, has the potential to be adaptive, address multiple objectives, and be crafted to the socio-economic setting. Manage…						0	0	0	0	1932-6203		WOS:000305349800029
J	Pais, Antonio; Serra, Simone; Meloni, Gianni; Saba, Sara; Ceccherelli, Giulia				Pais, Antonio/D-2209-2012			Harvesting Effects on Paracentrotus lividus Population Structure: A Case Study from Northwestern Sardinia, Italy, before and after the Fishing Season						JOURNAL OF COASTAL RESEARCH			28	3			570	575		10.2112/JCOASTRES-D-10-00119.1			2012-05-12	2012	PAIS, A.; SERRA, S.; MELONI, G.; SABA, S., and CECCHERELLI, G., 2012. Harvesting effects on Paracentrotus lividus population structure: A case study from northwestern Sardinia, Italy, before and after the fishing season. Journal of Coastal Research, 28(3), 570-575. West Palm Beach (Florida), ISSN 0749-0208.The edible sea urchin Paracentrotus lividus is commercially exploited in many European coun…						0	0	0	0	0749-0208		WOS:000304283200005
J	Curtice, Corrie; Dunn, Daniel C.; Roberts, Jason J.; Carr, Sarah D.; Halpin, Patrick N.							Why Ecosystem-Based Management May Fail without Changes to Tool Development and Financing						BIOSCIENCE			62	5			508	515		10.1525/bio.2012.62.5.13			2012-05-12	2012	Resource managers rely on tools to enact ecosystem-based management (EBM) principles and frequently express frustration at the difficulty of use and unreliability of available tools. EBM tool developers lack the consistent, long-term funding needed to develop high-quality tools. Through interviews, we determined several reasons for this funding problem including: (a) most EBM tools are developed …						0	0	0	0	1968-06-01		WOS:000304025000011
J	Freeman, Debbie J.; Breen, Paul A.; MacDiarmid, Alison B.							Use of a marine reserve to determine the direct and indirect effects of fishing on growth in a New Zealand fishery for the spiny lobster Jasus edwardsii						CANADIAN JOURNAL OF FISHERIES AND AQUATIC SCIENCES			69	5			894	905		10.1139/F2012-032			2012-05-12	2012	The effects of fishing on growth in a spiny lobster, Jasus edwardsii, were explored by using a no-take marine reserve as a control for these effects. We analysed data from lobster tag-recapture studies outside the reserve from 1975 until the present and tag-recapture from inside the reserve during a recent 8-year study. We explored whether recent and historical data showed similar growth and, usi…						0	0	0	0	0706-652X		WOS:000303447800009
J	Mullowney, Darrell R. J.; Morris, Corey J.; Dawe, Earl G.; Skanes, Katherine R.							Impacts of a bottom trawling exclusion zone on Snow Crab abundance and fish harvester behavior in the Labrador Sea, Canada						MARINE POLICY			36	3			567	575					2012-05-12	2012	The Hawke Box trawling exclusion zone off southern Labrador is a 8610 km(2) closed area implemented in 2003 to protect soft-shelled pre-recruit Snow Crab and juvenile cod from mortality imposed by shrimp trawling and other bottom-impact fisheries. This study utilizes survey, logbook, and observer data from the Snow Crab and Northern Shrimp fisheries to assess the effectiveness of the Hawke Box in…						0	0	0	0	0308-597X		CCC:000300201100001
J	Kearney, R.; Buxton, C. D.; Goodsell, P.; Farebrother, G.							Questionable interpretation of the Precautionary Principle in Australia's implementation of 'no-take' marine protected areas						MARINE POLICY			36	3			592	597					2012-05-12	2012	The introduction of marine protected areas (MPAs) in Australia has resulted in an increase in the number and total area of 'no-take' zones. The resulting closures impact all forms of commercial and recreational fishing in and around them despite international recognition indicating that Australian fisheries were already well managed according to ecological sustainable development guidelines. Furt…						1	0	0	1	0308-597X		CCC:000300201100004
J	O'Leary, B. C.; Brown, R. L.; Johnson, D. E.; von Nordheim, H.; Ardron, J.; Packeiser, T.; Roberts, C. M.							The first network of marine protected areas (MPAs) in the high seas: The process, the challenges and where next						MARINE POLICY			36	3			598	605					2012-05-12	2012	Marine protected areas (MPAs) are increasingly being established to protect and rebuild coastal and marine ecosystems. However, while the high seas are increasingly subject to exploitation, globally few MPAs exist in areas beyond national jurisdiction. In 2010 a substantial step forward was made in the protection of high seas ecosystems with 286,200 km(2) of the North-East Atlantic established as…						1	0	0	1	0308-597X		CCC:000300201100005
J	Chen, Chih-Shin							Management of the precious coral fishery in Taiwan: Progress and perspectives						MARINE POLICY			36	3			623	629					2012-05-12	2012	Precious corals have been commercially exploited because of their legendary and cultural importance for many centuries in the Mediterranean and for almost one century in the Northwest Pacific. Although the precious coral fishery in Taiwan dates back to the 1920s, relevant studies on biology and ecology of resources are relatively scarce. The management of the precious coral fishery in Taiwan was …						0	0	0	0	0308-597X		CCC:000300201100008
J	Marinesque, Sophie; Kaplan, David M.; Rodwell, Lynda D.							Global implementation of marine protected areas: Is the developing world being left behind?						MARINE POLICY			36	3			727	737					2012-05-12	2012	While the global network of marine protected areas (MPAs) has recently been evaluated in the light of bio-geographic targets, there has been no attempt to evaluate the relative conservation efforts made by the different nations with regards to their level of socio-economic development. Using information mostly gathered from the world database on protected areas (WDPA), this paper gives a comparat…						0	0	0	0	0308-597X		CCC:000300201100021
J	Clifton, Julian; Etienne, Michelle; Barnes, David K. A.; Barnes, Richard S. K.; Suggett, David J.; Smith, David J.							Marine conservation policy in Seychelles: Current constraints and prospects for improvement						MARINE POLICY			36	3			823	831					2012-05-12	2012	The marine assets of Seychelles are fundamental to the national economy through generating income derived from tourism and fisheries. Marine management institutions and policies have undergone radical changes since 2008, reflecting a number of drivers and initiatives at international and national levels. Through using the example of Curieuse Marine National Park in the inner Seychelles, we demons…						1	0	1	1	0308-597X		CCC:000300201100031
J	Cinner, Joshua E.; McClanahan, Tim R.; MacNeil, M. Aaron; Graham, Nicholas A. J.; Daw, Tim M.; Mukminin, Ahmad; Feary, David A.; Rabearisoa, Ando L.; Wamukota, Andrew; Jiddawi, Narriman; Campbell, Stuart J.; Baird, Andrew H.; Januchowski-Hartley, Fraser A.; Hamed, Salum; Lahari, Rachael; Morove, Tau; Kuange, John				Baird, Andrew/C-8449-2009			Comanagement of coral reef social-ecological systems						PROCEEDINGS OF THE NATIONAL ACADEMY OF SCIENCES OF THE UNITED STATES OF AMERICA			109	14			5219	5222		10.1073/pnas.1121215109			APR 3 2012	2012	In an effort to deliver better outcomes for people and the ecosystems they depend on, many governments and civil society groups are engaging natural resource users in collaborative management arrangements (frequently called comanagement). However, there are few empirical studies demonstrating the social and institutional conditions conducive to successful comanagement outcomes, especially in smal…						2	0	0	2	0027-8424		WOS:000302294700029
J	Cambie, Giulia; Ourens, Rosana; Vidal, Duarte F.; Carabel, Sirka; Freire, Juan							Economic performance of coastal fisheries in Galicia (NW Spain): case study of the Cies Islands						AQUATIC LIVING RESOURCES			25	2			195	204		10.1051/alr/2012010			2012-04-12	2012	Biological, social and economic information is necessary in order to assess the effectiveness of fisheries management measures. Indicators of the economic performance of fishing vessels are a useful tool for improving management strategies and are necessary for the implementation of the ecosystem approach to fisheries management in European waters. However, they are usually difficult to obtain fr…						0	0	0	0	0990-7440		WOS:000306431800010
J	Abbott, Joshua K.; Haynie, Alan C.							What are we protecting? Fisher behavior and the unintended consequences of spatial closures as a fishery management tool						ECOLOGICAL APPLICATIONS			22	3			762	777					2012-04-12	2012	Spatial closures like marine protected areas (MPAs) are prominent tools for ecosystem-based management in fisheries. However, the adaptive behavior of fishermen, the apex predator in the ecosystem, to MPAs may upset the balance of fishing impacts across species. While ecosystem-based management (EBM) emphasizes the protection of all species in the environment, the weakest stock often dominates ma…						0	0	0	0	1051-0761		WOS:000303312000003
J	Chan, Neil C. S.; Connolly, Sean R.; Mapstone, Bruce D.							Effects of sex change on the implications of marine reserves for fisheries						ECOLOGICAL APPLICATIONS			22	3			778	791					2012-04-12	2012	Marine reserves have become widely used in biodiversity conservation and are increasingly proposed as fisheries management tools. Previous modeling studies have found that reserves may increase or decrease yields, depending on local environmental conditions and on the specific life-history traits of the fishery species. Sex-changing (female-to-male) fish are targets of some of the most important …						0	0	0	0	1051-0761		WOS:000303312000004
J	Adams, Vanessa M.; Pressey, Robert L.; Stoeckl, Natalie				Adams, Vanessa/A-3834-2012			Estimating land and conservation management costs: The first step in designing a stewardship program for the Northern Territory						BIOLOGICAL CONSERVATION			148	1			44	53		10.1016/j.biocon.2012.01.064			2012-04-12	2012	Stewardship programs providing financial incentives for conservation on private lands are increasingly common. We estimate the potential costs of a stewardship program in the Daly River catchment, Northern Territory, which would underwrite the cost difference between routine land management and the additional requirements of conservation management on grazing properties. Based on survey responses…						1	0	1	1	2012-06-07		WOS:000302840100005
J	Ward-Paige, C. A.; Keith, D. M.; Worm, B.; Lotze, H. K.							Recovery potential and conservation options for elasmobranchs						JOURNAL OF FISH BIOLOGY			80	5	SI		1844	1869		10.1111/j.1095-8649.2012.03246.x			2012-04-12	2012	Many elasmobranchs have experienced strong population declines, which have been largely attributed to the direct and indirect effects of exploitation. Recently, however, live elasmobranchs are being increasingly valued for their role in marine ecosystems, dive tourism and intrinsic worth. Thus, management plans have been implemented to slow and ultimately reverse negative trends, including shark-…						0	0	0	0	0022-1112		WOS:000302722800044
J	Munroe, Daphne; Powell, Eric; Klinck, John; Hofmann, Eileen							HOW DO MARINE PROTECTED AREA STRATEGIES INFLUENCE METAPOPULATION GENETIC CONNECTIVITY? A MODELING STUDY WITH OYSTERS						JOURNAL OF SHELLFISH RESEARCH			31	1			325	325					2012-04-12	2012							0	0	0	0	0730-8000		WOS:000302846800263
J	Embling, Clare B.; Illian, Janine; Armstrong, Eric; van der Kooij, Jeroen; Sharples, Jonathan; Camphuysen, Kees C. J.; Scott, Beth E.				Sharples, Jonathan/F-1913-2011			Investigating fine-scale spatio-temporal predator-prey patterns in dynamic marine ecosystems: a functional data analysis approach						JOURNAL OF APPLIED ECOLOGY			49	2			481	492		10.1111/j.1365-2664.2012.02114.x			2012-04-12	2012	1. Spatial management of marine ecosystems requires detailed knowledge of spatio-temporal mechanisms linking physical and biological processes. Tidal currents, the main driver of ecosystem dynamics in temperate coastal ecosystems, influence predator foraging ecology by affecting prey distribution and ecology. The mechanistic links between tidal currents and how they influence predatorprey behavio…						0	0	0	0	0021-8901		WOS:000302070900021
J	Jentoft, Svein; Pascual-Fernandez, Jose J.; De la Cruz Modino, Raquel; Gonzalez-Ramallal, Manuel; Chuenpagdee, Ratana							What Stakeholders Think About Marine Protected Areas: Case Studies from Spain						HUMAN ECOLOGY			40	2			185	197					2012-04-12	2012	Marine protected areas (MPAs) are often met with reluctance by affected stakeholders, and in some instances outright objection. Some argue that this is due to insufficient understanding of the functions of MPAs. Others suggest that it could be because of a perception that they are losing more than they are gaining. It is also possible that stakeholders are generally supportive of the idea but thi…						0	0	0	0	0300-7839		CCC:000302749800003
J	Hilborn, Ray; Stewart, Ian J.; Branch, Trevor A.; Jensen, Olaf P.				Branch, Trevor/A-5691-2009			Defining Trade-Offs among Conservation, Profitability, and Food Security in the California Current Bottom-Trawl Fishery						CONSERVATION BIOLOGY			26	2						10.1111/j.1523-1739.2011.01800.x			2012-04-12	2012	Although it is recognized that marine wild-capture fisheries are an important source of food for much of the world, the cost of sustainable capture fisheries to species diversity is uncertain, and it is often questioned whether industrial fisheries can be managed sustainably. We evaluated the trade-off among sustainable food production, profitability, and conservation objectives in the groundfish…						1	0	1	1	0888-8892		WOS:000301981100009
J	Andrews, Kelly S.; Quinn, Thomas P.							Combining fishing and acoustic monitoring data to evaluate the distribution and movements of spotted ratfish Hydrolagus colliei						MARINE BIOLOGY			159	4			769	782		10.1007/s00227-011-1853-x			2012-04-12	2012	Direct and indirect methods have been used to describe patterns of movement of fishes, but few studies have compared these methods simultaneously. We used 20 years of trawl survey data and 1 year of acoustic telemetry data to evaluate the vertical and horizontal movement patterns of spotted ratfish Hydrolagus colliei in Puget Sound, WA, USA. Densities of large ratfish (a parts per thousand yen30 …						0	0	0	0	0025-3162		WOS:000301845900006
J	Akpalu, Wisdom; Vondolia, Godwin K.							Bioeconomic model of spatial fishery management in developing countries			2			ENVIRONMENT AND DEVELOPMENT ECONOMICS			17				145	161					2012-04-12	2012	Fishers in developing countries do not have the resources to acquire advanced technologies to exploit offshore fish stocks. As a result, the United Nations Convention on the Law of the Sea requires countries to sign partnership agreements with distant water fishing nations to exploit offshore stocks. However, for migratory stocks, the offshore may serve as a natural marine reserve (i.e., a source…						0	0	0	0	1355-770X		CCC:000302029900002
J	Sala-Bozano, Maria; Van Oosterhout, Cock; Mariani, Stefano				Mariani, Stefano/A-2964-2012			Impact of a mouth parasite in a marine fish differs between geographical areas						BIOLOGICAL JOURNAL OF THE LINNEAN SOCIETY			105	4			842	852		10.1111/j.1095-8312.2011.01838.x			2012-04-12	2012	Considerable variation exists in parasite virulence and host tolerance which may have a genetic and/or environmental basis. In this article, we study the effects of a striking, mouth-dwelling, blood-feeding isopod parasite (Ceratothoa italica) on the life history and physiological condition of two Mediterranean populations of the coastal fish, Lithognathus mormyrus. The growth and hepatosomatic i…						1	0	1	1	0024-4066		WOS:000301114900010
J	Coll, Marta; Piroddi, Chiara; Albouy, Camille; Lasram, Frida Ben Rais; Cheung, William W. L.; Christensen, Villy; Karpouzi, Vasiliki S.; Guilhaumon, Francois; Mouillot, David; Paleczny, Michelle; Palomares, Maria Lourdes; Steenbeek, Jeroen; Trujillo, Pablo; Watson, Reg; Pauly, Daniel				Watson, Reg/F-4850-2012; albouy, camille/H-9317-2012			The Mediterranean Sea under siege: spatial overlap between marine biodiversity, cumulative threats and marine reserves						GLOBAL ECOLOGY AND BIOGEOGRAPHY			21	4			465	480		10.1111/j.1466-8238.2011.00697.x			2012-04-12	2012	Aim A large body of knowledge exists on individual anthropogenic threats that have an impact on marine biodiversity in the Mediterranean Sea, although we know little about how these threats accumulate and interact to affect marine species and ecosystems. In this context, we aimed to identify the main areas where the interaction between marine biodiversity and threats is more pronounced and to ass…						3	0	3	3	1466-822X		WOS:000301227200007
J	de Figueiredo Silva, Sirley L.; Camargo, Mauricio; Estupinan, Ruth A.							Fishery management in a conservation area. The case of the Oiapoque River in northern Brazil						CYBIUM			36	1			17	30					MAR 31 2012	2012	This study recorded the diversity of fish caught in and around the Cabo Orange National Park in northern Brazil in 2008, and estimated the fishing effort and CPUE of the local artisanal fleet. Two fishery zones - the Oiapoque River and a coastal zone were identified. Monitoring of catches recorded 34 fish species. A PCA of the catches of the Seven principal species revealed marked loadings. The f…						1	0	1	1	0399-0974		WOS:000303949900003
J	Bond, Mark E.; Babcock, Elizabeth A.; Pikitch, Ellen K.; Abercrombie, Debra L.; Lamb, Norlan F.; Chapman, Demian D.							Reef Sharks Exhibit Site-Fidelity and Higher Relative Abundance in Marine Reserves on the Mesoamerican Barrier Reef						PLOS ONE			7	3					e32983	10.1371/journal.pone.0032983			MAR 8 2012	2012	Carcharhinid sharks can make up a large fraction of the top predators inhabiting tropical marine ecosystems and have declined in many regions due to intense fishing pressure. There is some support for the hypothesis that carcharhinid species that complete their life-cycle within coral reef ecosystems, hereafter referred to as "reef sharks'', are more abundant inside no-take marine reserves due to…						1	0	1	1	1932-6203		WOS:000303062000024
J	Madin, Elizabeth M. P.; Gaines, Steven D.; Madin, Joshua S.; Link, Anne-Katrin; Lubchenco, Peggy J.; Selden, Rebecca L.; Warner, Robert R.							Do Behavioral Foraging Responses of Prey to Predators Function Similarly in Restored and Pristine Foodwebs?						PLOS ONE			7	3					e32390	10.1371/journal.pone.0032390			MAR 5 2012	2012	Efforts to restore top predators in human-altered systems raise the question of whether rebounds in predator populations are sufficient to restore pristine foodweb dynamics. Ocean ecosystems provide an ideal system to test this question. Removal of fishing in marine reserves often reverses declines in predator densities and size. However, whether this leads to restoration of key functional charac…						0	0	0	0	1932-6203		WOS:000303017700047
J	Pande, A.; Gardner, J. P. A.							The Kapiti Marine Reserve (New Zealand): spatial and temporal comparisons of multi-species responses after 8 years of protection						NEW ZEALAND JOURNAL OF MARINE AND FRESHWATER RESEARCH			46	1			71	89		10.1080/00288330.2011.602088			2012-03-12	2012	Kapiti Marine Reserve (KMR) was established in May 1992 following a single baseline biological survey. We surveyed macroalgal, macroinvertebrate and fish species for abundance and/or size at two sites inside and two outside KMR and then conducted reservation status (inside vs outside KMR) and temporal (1992 baseline vs 1999-2000) tests to quantify biological responses after 8 years of protection.…						0	0	0	0	0028-8330		WOS:000304675700007
J	Macdonald, David W.; Johnson, Paul J.; Albrechtsen, Lise; Seymour, Sarah; Dupain, Jef; Hall, Amy; Fa, John E.							Bushmeat trade in the Cross-Sanaga rivers region: Evidence for the importance of protected areas						BIOLOGICAL CONSERVATION			147	1			107	114		10.1016/j.biocon.2011.12.018			2012-03-12	2012	Exploitation of wildlife for meat in the tropics ('bushmeat') is a critical threat for biodiversity, particularly in Africa. Here, we investigate the importance of protected areas (National Parks and other forest parks) as sources for the trade by exploring patterns in pricing and condition of bushmeat carcasses. We surveyed carcass prices in a large sample of trading points (87 markets surveyed,…						0	0	0	0	2012-06-07		WOS:000302972700014
J	Deepananda, K. H. M. Ashoka; Macusi, Edison D.							Human Disturbance on Tropical Rockyshore Assemblages and the Role of Marine Protected Areas in Reducing its Impact						PHILIPPINE AGRICULTURAL SCIENTIST			95	1			87	98					2012-03-12	2012	Marine protected areas (MPAs) are areas in the coastal zone of land or seas especially dedicated to protection and maintenance of biological diversity, and are currently receiving increasing attention as management tools for protecting marine populations from destructive human activities. The present study explores the impact of a marine protected area (MPA) in Sri Lanka on a gradient of anthropo…						0	0	0	0	0031-7454		WOS:000302851600009
J	Sheppard, C. R. C.; Ateweberhan, M.; Bowen, B. W.; Carr, P.; Chen, C. A.; Clubbe, C.; Craig, M. T.; Ebinghaus, R.; Eble, J.; Fitzsimmons, N.; Gaither, M. R.; Gan, C-H.; Gollock, M.; Guzman, N.; Graham, N. A. J.; Harris, A.; Jones, R.; Keshavmurthy, S.; Koldewey, H.; Lundin, C. G.; Mortimer, J. A.; Obura, D.; Pfeiffer, M.; Price, A. R. G.; Purkis, S.; Raines, P.; Readman, J. W.; Riegl, B.; Rogers,…							Reefs and islands of the Chagos Archipelago, Indian Ocean: why it is the world's largest no-take marine protected area						AQUATIC CONSERVATION-MARINE AND FRESHWATER ECOSYSTEMS			22	2			232	261		10.1002/aqc.1248			2012-03-12	2012	The Chagos Archipelago was designated a no-take marine protected area (MPA) in 2010; it covers 550 000?km2, with more than 60 000?km2 shallow limestone platform and reefs. This has doubled the global cover of such MPAs. It contains 2550% of the Indian Ocean reef area remaining in excellent condition, as well as the world's largest contiguous undamaged reef area. It has suffered from warming episo…						2	0	1	2	1052-7613		WOS:000302351400010
J	Ban, Natalie C.; Cinner, Joshua E.; Adams, Vanessa M.; Mills, Morena; Almany, Glenn R.; Ban, Stephen S.; Mccook, Laurence J.; White, Alan				Ban, Natalie/C-6938-2009; Adams, Vanessa/A-3834-2012; Ban, Stephen/C-6903-2009			Recasting shortfalls of marine protected areas as opportunities through adaptive management						AQUATIC CONSERVATION-MARINE AND FRESHWATER ECOSYSTEMS			22	2			262	271		10.1002/aqc.2224			2012-03-12	2012	Many marine ecosystems are in critical decline. Iterative assessments of the costs, benefits, and problems associated with conservation initiatives such as marine protected areas (MPAs) can help to improve their effectiveness. The increasingly popular framework of marine spatial planning (MSP) provides opportunities for improving marine management but also needs to avoid similar shortfalls to tho…						0	0	0	0	1052-7613		WOS:000302351400011
J	Fujitani, Marie L.; Fenichel, Eli P.; Torre, Jorge; Gerber, Leah R.							Implementation of a marine reserve has a rapid but short-lived effect on recreational angler use						ECOLOGICAL APPLICATIONS			22	2			597	605					2012-03-12	2012	Changes in human behavior are a precursor to measurable impacts of no-take marine reserves. We investigated changes in recreational fishing site selection in response to the 2005 announcement of enforcement in a marine reserve in the Gulf of California, Mexico. We used a novel data set of daily self-reported boating destinations from emergency rescue logbooks for a recreational angling community …						0	0	0	0	1051-0761		WOS:000302516900017
J	Tolon, Vincent; Martin, Jodie; Dray, Stephane; Loison, Anne; Fischer, Claude; Baubet, Eric							Predator-prey spatial game as a tool to understand the effects of protected areas on harvester-wildlife interactions						ECOLOGICAL APPLICATIONS			22	2			648	657					2012-03-12	2012	No-take reserves are sometimes implemented for sustainable population harvesting because they offer opportunities for animals to spatially avoid harvesters, whereas harvesters can benefit in return from the reserve spillover. Here, we used the framework of predator-prey spatial games to understand how protected areas shape spatial interactions between harvesters and target species and determine a…						0	0	0	0	1051-0761		WOS:000302516900021
J	Sarda, Rafael; Rossi, Sergi; Marti, Xavier; Gili, Josep Maria							Marine benthic cartography of the Cap de Creus (NE Catalan Coast, Mediterranean Sea)						SCIENTIA MARINA			76	1			159	171		10.3989/scimar.03101.18D			2012-03-12	2012	The marine benthic cartography of the Cap de Creus and surrounding areas (NW Mediterranean Sea) was obtained by combining classical grabbing methods with more recent imaging methods based on a remotely operated vehicle. The goals of this particular survey can be summarized as follows: 1) to chart the benthic communities (and the area of each one); 2) to evaluate the benthic diversity of the areas…						0	0	0	0	0214-8358		WOS:000301806800017
J	Croxall, John P.; Butchart, Stuart H. M.; Lascelles, Ben; Stattersfield, Alison J.; Sullivan, Ben; Symes, Andy; Taylor, Phil							Seabird conservation status, threats and priority actions: a global assessment						BIRD CONSERVATION INTERNATIONAL			22	1			1	34		10.1017/S0959270912000020			2012-03-12	2012	We review the conservation status of, and threats to, all 346 species of seabirds, based on BirdLife International's data and assessments for the 2010 IUCN Red List. We show that overall, seabirds are more threatened than other comparable groups of birds and that their status has deteriorated faster over recent decades. The principal current threats at sea are posed by commercial fisheries (throu…						7	0	4	7	0959-2709		WOS:000301298900001
J	Alos, Josep; Cabanellas-Reboredo, Miguel; March, David							Spatial and temporal patterns in the movement of adult two-banded sea bream Diplodus vulgaris (Saint-Hilaire, 1817)						FISHERIES RESEARCH			115				82	88		10.1016/j.fishres.2011.11.025			2012-03-12	2012	The patterns of spatial and temporal activity during the spawning season for an important recreational and commercial target species from the Mediterranean Sea and mid-east Atlantic, Diplodus vulgaris, were investigated using acoustic telemetry. No diel behavior was found in the detection pattern and the probability of detecting any tagged fish was independent of time. Individual fish spent 95% o…						0	0	0	0	0165-7836		WOS:000301203900008
J	Ellis, Robert D.; Powers, Joseph E.							Gag grouper, marine reserves, and density-dependent sex change in the Gulf of Mexico						FISHERIES RESEARCH			115				89	98		10.1016/j.fishres.2011.11.024			2012-03-12	2012	The use of marine reserves for fishery management remains a controversial tool despite evidence of their success. In the Gulf of Mexico (GOM), two marine reserves were put in place in order to protect spawning aggregations of gag grouper, which has experienced a steep decline in the male to female sex ratio since the 1970s. Reserve success is ultimately a function of the total amount of spawning …						0	0	0	0	0165-7836		WOS:000301203900009
J	Heck, Nadine; Dearden, Philip; McDonald, Adrian							Insights into marine conservation efforts in temperate regions: Marine protected areas on Canada's West Coast						OCEAN & COASTAL MANAGEMENT			57				10	20		10.1016/j.ocecoaman.2011.11.008			2012-03-12	2012	In order to ensure effectiveness of marine protected area (MPA) management, the development of relevant indicators and evaluation of marine protected areas' performance is increasingly advocated. While most studies so far have focused on MPAs in tropical areas, this study investigates performance of temperate MPAs in British Columbia on the West coast of Canada. Contextual factors including manag…						0	0	0	0	0964-5691		WOS:000300123800002
J	Pinho, Patricia Fernanda; Orlove, Ben; Lubell, Mark				Lubell, Mark/H-5018-2012			Overcoming Barriers to Collective Action in Community-Based Fisheries Management in the Amazon						HUMAN ORGANIZATION			71	1			99	109					SPR 2012	2012	A set of freshwater fisheries management institutions in the central Brazilian Amazon leads us to propose an expansion of the common pool resource (CPR) management models developed by Ostrom. We analyze the origins and effectiveness of a community-based CPR system that has emerged despite several features that are, in Ostrom's view, barriers to local institutional development: the fish population…						0	0	0	0	0018-7259		CCC:000300774500010
J	Elizabeth Barroeta-Hlusicka, Maria; Buitrago, Joaquin; Rada, Martin; Perez, Ricardo							Contrasting approved uses against actual uses at La Restinga Lagoon National Park, Margarita Island, Venezuela. A GPS and GIS method to improve management plans and rangers coverage						JOURNAL OF COASTAL CONSERVATION			16	1			65	76		10.1007/s11852-011-0170-3			2012-03-12	2012	Protected areas are the core of efforts to conserve biological diversity and zoning uses, and they are used as a tool for their management. Global Positioning Systems (GPS) and Geographic Information System (GIS) have been used to evaluate conflicts between approved uses and actual uses in La Restinga Lagoon National Park in Venezuela (LRLNP). The park (188.6 km(2)), covers various ecosystems suc…						0	0	0	0	1400-0350		WOS:000300888500007
J	Barbera, C.; Moranta, J.; Ordines, F.; Ramon, M.; de Mesa, A.; Diaz-Valdes, M.; Grau, A. M.; Massuti, E.				Moranta, Joan/B-5522-2008			Biodiversity and habitat mapping of Menorca Channel (western Mediterranean): implications for conservation						BIODIVERSITY AND CONSERVATION			21	3			701	728		10.1007/s10531-011-0210-1			2012-03-12	2012	Menorca Channel (Balearic Islands, western Mediterranean) comprises 98,700 Ha of continental shelf. It has been proposed to include this area in the Natura 2000 network due to the wide range of species and habitats of high conservation value found here, such as Posidonia oceanica meadows and maA << rl and coralligenous beds. This study aimed to establish a scientific basis for managing and protec…						1	0	0	1	0960-3115		WOS:000300248500007
J	Langebrake, Jessica; Riotte-Lambert, Louise; Osenberg, Craig W.; De Leenheer, Patrick				Langebrake, Jessica/D-9582-2012			Differential movement and movement bias models for marine protected areas						JOURNAL OF MATHEMATICAL BIOLOGY			64	4	SI		667	696		10.1007/s00285-011-0407-7			2012-03-12	2012	Marine protected areas (MPAs) are promoted as a tool to protect overfished stocks and increase fishery yields. Previous models suggested that adult mobility modified effects of MPAs by reducing densities of fish inside reserves, but increasing yields (i.e., increasing densities outside of MPAs). Empirical studies contradicted this prediction: as mobility increased, the relative density of fishes …						0	0	0	0	0303-6812		WOS:000300294200005
J	Caballero, S.; Cardenosa, D.; Soler, G.; Hyde, J.							Application of multiplex PCR approaches for shark molecular identification: feasibility and applications for fisheries management and conservation in the Eastern Tropical Pacific						MOLECULAR ECOLOGY RESOURCES			12	2			233	237		10.1111/j.1755-0998.2011.03089.x			2012-03-12	2012	Here we describe the application of new and existing multiplex PCR methodologies for shark species molecular identification. Four multiplex systems (group ID, thresher sharks, hammerhead sharks and miscellaneous shark) were employed with primers previously described and some designed in this study, which allow for species identification after running PCR products through an agarose gel. This syst…						0	0	0	0	1755-098X		WOS:000299930300005
J	Fleming, D. M.; Jones, P. J. S.				Jones, Peter/C-3322-2008			Challenges to achieving greater and fairer stakeholder involvement in marine spatial planning as illustrated by the Lyme Bay scallop dredging closure						MARINE POLICY			36	2			370	377					2012-03-12	2012	The statutory closure of 60 square miles of Lyme Bay to towed fishing gear in 2008 marked the culmination of nearly 20 years of discussions between conservationists and fishermen. Prior to the 2008 decision, voluntary, bottom-up led agreements resulted in inadequate protection of the bay's biological resources and significant erosion of social capital. Lyme Bay provides an excellent case study of…						2	0	1	2	0308-597X		CCC:000298219300009
J	Leleu, Kevin; Alban, Frederique; Pelletier, Dominique; Charbonnel, Eric; Letourneur, Yves; Boudouresque, Charles F.				LETOURNEUR, Yves/B-4387-2012			Fishers' perceptions as indicators of the performance of Marine Protected Areas (MPAs)						MARINE POLICY			36	2			414	422					2012-03-12	2012	How users perceive the performance of Marine Protected Areas (MPAs) is fundamental for the social acceptance of these zones. Moreover, their perceptions may be relevant for monitoring the effects of MPAs on extractive activities. This study analyzes artisanal fishers' perceptions of the performance of a north-western Mediterranean coastal MPA, which encompasses two no-take zones (NTZs). Three vie…						0	0	0	0	0308-597X		CCC:000298219300015
J	Voyer, Michelle; Gladstone, William; Goodall, Heather							Methods of social assessment in Marine Protected Area planning: Is public participation enough?						MARINE POLICY			36	2			432	439					2012-03-12	2012	Addressing social and economic considerations is crucial to the success of Marine Protected Area (MPA) planning and management. Ineffective social assessment can alienate local communities and undermine the success of existing and future MPAs. It is rare to critique the success of methods used currently to incorporate social and economic considerations into MPA planning. Three Australian MPA plan…						0	0	0	0	0308-597X		CCC:000298219300017
J	Wamukota, A. W.; Cinner, J. E.; McClanahan, T. R.							Co-management of coral reef fisheries: A critical evaluation of the literature						MARINE POLICY			36	2			481	488					2012-03-12	2012	In many parts of the world, inshore marine resources are being increasingly managed through collaborative arrangements between communities, governments, civil society and other groups. However, co-management of fisheries has had a mixture of successes and failures. Theorists and applied researchers have suggested a series of preconditions or factors thought to improve the chances of successful co…						0	0	0	0	0308-597X		CCC:000298219300024
J	Sumaila, Ussif Rashid; Huang, Ling							Managing Bluefin Tuna in the Mediterranean Sea						MARINE POLICY			36	2			502	511					2012-03-12	2012	Atlantic Bluefin Tuna is an important but not well managed fishery in the Mediterranean Sea. In this paper, management system is evaluated with information on stock status, resource rent, and total employment. The non-restrictive implementation of International Commission for the Conservation of Atlantic Tunas (ICCAT) policies is found to be the institutional reason for its management failure, wh…						0	0	0	0	0308-597X		CCC:000298219300027
J	Huang, Ming-Ho; Ou, Ching-Hsiewn							A discussion of management disputes arising from the multiple utilization of flying fish resources in Taiwan and suggested countermeasures						MARINE POLICY			36	2			512	519					2012-03-12	2012	Flying fish play a vital role in maintaining the balance of marine ecosystems. In Taiwan, flying fish resources are mainly utilized in three ways. The Tao aboriginal people regard them as an important, and spiritual, source of food and utilize the resource sparingly and cautiously. Conversely, in northern Taiwan, fisheries harvest flying fish roe, which may in the future lead to ecosystem damage.…						0	0	0	0	0308-597X		CCC:000298219300028
J	Stevenson, Charlotte; Sikich, Sarah Abramson; Gold, Mark							Engaging Los Angeles County subsistence anglers in the California marine protected area planning process						MARINE POLICY			36	2			559	563					2012-03-12	2012	Ecosystem-based management is more successful when a great diversity of stakeholders is engaged early in a decision-making process. Implementation of the California Marine Life Protection Act (MLPA) has been stakeholder-based, coordinating the participation of a wide range of people including divers, fishermen, conservationists, local officials, business owners and coastal residents. Although com…						0	0	0	0	0308-597X		CCC:000298219300034
J	Sala, Enric; Ballesteros, Enric; Dendrinos, Panagiotis; Di Franco, Antonio; Ferretti, Francesco; Foley, David; Fraschetti, Simonetta; Friedlander, Alan; Garrabou, Joaquim; Guclusoy, Harun; Guidetti, Paolo; Halpern, Benjamin S.; Hereu, Bernat; Karamanlidis, Alexandros A.; Kizilkaya, Zafer; Macpherson, Enrique; Mangialajo, Luisa; Mariani, Simone; Micheli, Fiorenza; Pais, Antonio; Riser, Kristin; Ro…							The Structure of Mediterranean Rocky Reef Ecosystems across Environmental and Human Gradients, and Conservation Implications						PLOS ONE			7	2					e32742	10.1371/journal.pone.0032742			FEB 29 2012	2012	Historical exploitation of the Mediterranean Sea and the absence of rigorous baselines makes it difficult to evaluate the current health of the marine ecosystems and the efficacy of conservation actions at the ecosystem level. Here we establish the first current baseline and gradient of ecosystem structure of nearshore rocky reefs at the Mediterranean scale. We conducted underwater surveys in 14 …						3	0	2	3	1932-6203		WOS:000303003500099
J	Davidson, Ana D.; Boyer, Alison G.; Kim, Hwahwan; Pompa-Mansilla, Sandra; Hamilton, Marcus J.; Costa, Daniel P.; Ceballos, Gerardo; Brown, James H.							Drivers and hotspots of extinction risk in marine mammals						PROCEEDINGS OF THE NATIONAL ACADEMY OF SCIENCES OF THE UNITED STATES OF AMERICA			109	9			3395	3400		10.1073/pnas.1121469109			FEB 28 2012	2012	The world's oceans are undergoing profound changes as a result of human activities. However, the consequences of escalating human impacts on marine mammal biodiversity remain poorly understood. The International Union for the Conservation of Nature (IUCN) identifies 25% of marine mammals as at risk of extinction, but the conservation status of nearly 40% of marine mammals remains unknown due to i…						2	0	2	2	0027-8424		WOS:000300828200044
J	Erisman, Brad; Aburto-Oropeza, Octavio; Gonzalez-Abraham, Charlotte; Mascarenas-Osorio, Ismael; Moreno-Baez, Marcia; Hastings, Philip A.							Spatio-temporal dynamics of a fish spawning aggregation and its fishery in the Gulf of California						SCIENTIFIC REPORTS			2						284	10.1038/srep00284			FEB 22 2012	2012	We engaged in cooperative research with fishers and stakeholders to characterize the fine-scale, spatio-temporal characteristics of spawning behavior in an aggregating marine fish (Cynoscion othonopterus: Sciaenidae) and coincident activities of its commercial fishery in the Upper Gulf of California. Approximately 1.5-1.8 million fish are harvested annually from spawning aggregations of C. othono…						0	0	0	0	2045-2322		WOS:000300587500002
J	Allnutt, Thomas F.; McClanahan, Timothy R.; Andrefouet, Serge; Baker, Merrill; Lagabrielle, Erwann; McClennen, Caleb; Rakotomanjaka, Andry J. M.; Tianarisoa, Tantely F.; Watson, Reg; Kremen, Claire							Comparison of Marine Spatial Planning Methods in Madagascar Demonstrates Value of Alternative Approaches						PLOS ONE			7	2					e28969	10.1371/journal.pone.0028969			FEB 16 2012	2012	The Government of Madagascar plans to increase marine protected area coverage by over one million hectares. To assist this process, we compare four methods for marine spatial planning of Madagascar's west coast. Input data for each method was drawn from the same variables: fishing pressure, exposure to climate change, and biodiversity (habitats, species distributions, biological richness, and bio…						0	0	0	0	1932-6203		WOS:000302796200003
J	Kearney, Robert; Farebrother, Graham							Expand Australia's sustainable fisheries						NATURE			482	7384			162	162					FEB 9 2012	2012							0	0	0	0	0028-0836		WOS:000299994100020
J	Abrams, Peter A.; Ruokolainen, Lasse; Shuter, Brian J.; McCann, Kevin S.				Shuter, Brian/A-3991-2008; Abrams, Peter/A-5240-2008			Harvesting creates ecological traps: consequences of invisible mortality risks in predator-prey metacommunities						ECOLOGY			93	2			281	293					2012-02-12	2012	Models of two-patch predator-prey metacommunities are used to explore how the global predator population changes in response to additional mortality in one of the patches. This could describe the dynamics of a predator in an environment that includes a refuge area where that predator is protected and a spatially distinct ("risky") area where it is harvested. The predator's movement is based on it…						0	0	0	0	1958-12-01		WOS:000302794100009
J	Gonzalez-Wangueemert, Mercedes; Fernandez, Tomas Vega; Perez-Ruzafa, Angel; Giacalone, Maximilian; D'Anna, Giovanni; Badalamenti, Fabio				Perez-Ruzafa, Angel/A-3406-2009			Genetic considerations on the introduction of farmed fish in marine protected areas: The case of study of white seabream restocking in the Gulf of Castellammare (Southern Tyrrhenian Sea)						JOURNAL OF SEA RESEARCH			68				41	48		10.1016/j.seares.2011.12.005			2012-02-12	2012	Human exploitation has drastically reduced the abundance and distribution of several marine fish and invertebrate populations through overfishing and habitat destruction. Restocking can potentially mitigate these impacts and help to reconstitute depleted stocks but genetic repercussions must be considered. In the present study, the degree of genetic similarity between white seabream (Diplodus sar…						0	0	0	0	1385-1101		WOS:000301688400005
J	Cinner, J. E.; McClanahan, T. R.; Graham, N. A. J.; Daw, T. M.; Maina, J.; Stead, S. M.; Wamukota, A.; Brown, K.; Bodin, O.							Vulnerability of coastal communities to key impacts of climate change on coral reef fisheries						GLOBAL ENVIRONMENTAL CHANGE-HUMAN AND POLICY DIMENSIONS			22	1			12	20		10.1016/j.gloenvcha.2011.09.018			2012-02-12	2012	Coral reefs support the livelihood of millions of people especially those engaged in marine fisheries activities. Coral reefs are highly vulnerable to climate change induced stresses that have led to substantial coral mortality over large spatial scales. Such climate change impacts have the potential to lead to declines in marine fish production and compromise the livelihoods of fisheries depende…						0	0	0	0	0959-3780		WOS:000300817500003
J	Berumen, Michael L; Almany, Glenn R; Planes, Serge; Jones, Geoffrey P; Saenz-Agudelo, Pablo; Thorrold, Simon R							Persistence of self-recruitment and patterns of larval connectivity in a marine protected area network.						Ecology and evolution			2	2			444	52					2012-Feb	2012	The use of marine protected area (MPA) networks to sustain fisheries and conserve biodiversity is predicated on two critical yet rarely tested assumptions. Individual MPAs must produce sufficient larvae that settle within that reserve's boundaries to maintain local populations while simultaneously supplying larvae to other MPA nodes in the network that might otherwise suffer local extinction. Her…						1	0	0	1	2045-7758		MEDLINE:22423335
J	Lucifora, Luis O.; Garcia, Veronica B.; Menni, Roberto C.; Worm, Boris							Spatial patterns in the diversity of sharks, rays, and chimaeras (Chondrichthyes) in the Southwest Atlantic						BIODIVERSITY AND CONSERVATION			21	2			407	419		10.1007/s10531-011-0189-7			2012-02-12	2012	Knowing how the diversity of sharks, rays and chimaeras (Chondrichthyes) is distributed helps us to design strategies to conserve these highly-vulnerable predators and their habitats. Here, we analyzed the spatial distribution of chondrichthyan species richness in the Southwest Atlantic (34-56A(0)S), and its relationship with environmental variables and marine fronts, by using a dataset obtained …						0	0	0	0	0960-3115		WOS:000299703400006
J	Linares, Cristina; Garrabou, Joaquim; Hereu, Bernat; Diaz, David; Marschal, Christian; Sala, Enric; Zabala, Mikel							Assessing the Effectiveness of Marine Reserves on Unsustainably Harvested Long-Lived Sessile Invertebrates						CONSERVATION BIOLOGY			26	1			88	96		10.1111/j.1523-1739.2011.01795.x			2012-02-12	2012	Although the rapid recovery of fishes after establishment of a marine reserve is well known, much less is known about the response of long-lived, sessile, benthic organisms to establishment of such reserves. Since antiquity, Mediterranean red coral (Corallium rubrum) has been harvested intensively for use in jewelry, and its distribution is currently smaller than its historical size throughout th…						0	0	0	0	0888-8892		WOS:000299468600012
J	Ainsworth, Cameron H.; Morzaria-Luna, Hem Nalini; Kaplan, Isaac C.; Levin, Phillip S.; Fulton, Elizabeth A.				Fulton, Elizabeth/A-2871-2008			Full compliance with harvest regulations yields ecological benefits: Northern Gulf of California case study						JOURNAL OF APPLIED ECOLOGY			49	1			63	72		10.1111/j.1365-2664.2011.02064.x			2012-02-12	2012	1. The Northern Gulf of California is an ecologically important marine area with a high degree of biodiversity, endemism and productivity. Mounting conservation concerns have prompted researchers to propose new management regulations, restricting fishing and protecting sensitive species. Compliance with existing regulations is poor. Rules that are currently in place, if followed, may go a long wa…						1	0	0	1	0021-8901		WOS:000299153800009
J	Morton, Brian; Lee, Christine N. W.							The composition and spatial distribution of scavenging hyperbenthos in the Cape d'Aguilar Marine Reserve, Hong Kong						JOURNAL OF THE MARINE BIOLOGICAL ASSOCIATION OF THE UNITED KINGDOM			92	1			39	47		10.1017/S0025315411000543			2012-02-12	2012	Baited traps with a 5 mm diameter opening were deployed 9 cm off the seabed in the Cape d'Aguilar Marine Reserve, Hong Kong. In contrast to analogous studies from boreal waters, lysianassoids accounted for 0.5% of the total number of trapped hyperbenthos. Species of Tisbe (Copepoda: Tisbidae), Ceradocus (Gammaridea: Melitidae), Nebalia (Leptostraca: Nebaliacea), unidentified benthic ostracods, Ne…						0	0	0	0	0025-3154		WOS:000299655400004
J	Conrad, Jon M.; Smith, Martin D.							NONSPATIAL AND SPATIAL MODELS IN BIOECONOMICS						NATURAL RESOURCE MODELING			25	1	SI		52	92		10.1111/j.1939-7445.2011.00102.x			2012-02-12	2012	Beginning in the 1960s, ecologists, mathematicians, and economists started developing a class of models, which today are referred to as bioeconomic models. These early models started with a difference or differential equation describing the dynamics of a biological resource. To this equation one might add a second difference or differential equation describing the dynamics of harvesting effort. A…						0	0	0	0	0890-8575		WOS:000298636200003
J	Sumaila, U. Rashid							Call to split fisheries at home and abroad						NATURE			481	7381			265	265					JAN 19 2012	2012							1	0	0	1	0028-0836		WOS:000299210600019
J	Claisse, Jeremy T.; Pondella, Daniel J., II; Williams, Jonathan P.; Sadd, James							Using GIS Mapping of the Extent of Nearshore Rocky Reefs to Estimate the Abundance and Reproductive Output of Important Fishery Species						PLOS ONE			7	1					e30290	10.1371/journal.pone.0030290			JAN 17 2012	2012	Kelp Bass (Paralabrax clathratus) and California Sheephead (Semicossyphus pulcher) are economically and ecologically valuable rocky reef fishes in southern California, making them likely indicator species for evaluating resource management actions. Multiple spatial datasets, aerial and satellite photography, underwater observations and expert judgment were used to produce a comprehensive map of n…						0	0	0	0	1932-6203		WOS:000301454400104
J	Richardson, T. J.; Potts, W. M.; Sauer, W. H. H.							The biology of Barnard's dentex, Dentex barnardi (Teleostei: Sparidae), in southern Angola						AFRICAN JOURNAL OF MARINE SCIENCE			34	2			223	231		10.2989/1814232X.2012.675124			2012	2012	Barnard's dentex Dentex barnardi is a relatively slow-growing, late-maturing species with an intermediate longevity (maximum recorded age = 13 years). The length and age structures of the population were similar for males and females; however, the sex ratio was female biased at 1:1.6. Growth was described by the three-parameter von Bertalanffy model as L-t = 332.14(1 - e(-0.14(t+3.97))). The spec…						0	0	0	0	1814-232X		WOS:000308102200007
J	Currie, J. C.; Sink, K. J.; Le Noury, P.; Branch, G. M.							Comparing fish communities in sanctuaries, partly protected areas and open-access reefs in South-East Africa						AFRICAN JOURNAL OF MARINE SCIENCE			34	2			269	281		10.2989/1814232X.2012.709963			2012	2012	Fish were surveyed by visual census on offshore reefs in Mozambique and eastern South Africa to compare (a) fully-protected 'sanctuary' areas, (b) 'partly protected' areas where recreational diving and limited fishing are permitted, and (c) 'open' unprotected areas. Community composition differed between coral-dominated reefs and those covered mainly by algae and sponges, but not among treatments…						0	0	0	0	1814-232X		WOS:000308102200012
J	Smallwood, Claire B.; Beckley, Lynnath E.; Moore, Susan A.							Influence of Zoning and Habitats on the Spatial Distribution of Recreational Activities in a Multiple-Use Marine Park						COASTAL MANAGEMENT			40	4			381	400		10.1080/08920753.2012.692312			2012	2012	The spatial distribution of recreation is influenced by many factors, and also differs between activity types. Understanding these relationships is essential for planning and sustainable management of resource use, especially in coastal marine parks, which are often exposed to considerable anthropogenic pressure. However, such information is rarely available, especially at fine spatial scales. Ni…						0	0	0	0	0892-0753		WOS:000309124300003
J	Bernardi, Giacomo; Beldade, Ricardo; Holbrook, Sally J; Schmitt, Russell J							Full-sibs in cohorts of newly settled coral reef fishes.						PloS one			7	9			e44953	e44953		10.1371/journal.pone.0044953			2012	2012	Reef fishes exhibit a bipartite life cycle where a benthic adult stage is preceded by a pelagic dispersal phase during which larvae are presumed to be mixed and transported by oceanic currents. Genetic analyses based on twelve microsatellite loci of 181 three-spot dascyllus (Dascyllus trimaculatus) that settled concurrently on a small reef in French Polynesia revealed 11 groups of siblings (1 ful…						0	0	0	0	1932-6203		MEDLINE:23028700
J	Grilo, Catarina; Chircop, Aldo; Guerreiro, Jose							Prospects for Transboundary Marine Protected Areas in East Africa						OCEAN DEVELOPMENT AND INTERNATIONAL LAW			43	3			243	266					2012	2012	Transboundary marine protected areas have been proposed in East Africa to tackle threats to marine biodiversity, meet international MPA targets, promote tourism, and contribute to poverty reduction. This article examines what may drive, facilitate, or constrain states in creating a regime for transboundary MPAs. In East Africa, a regime between Mozambique and Tanzania is not yet formed and may be…						0	0	0	0	0090-8320		CCC:000308127400002
J	Cintra da Costa Nunes, Jose de Anchieta; Medeiros, Diego Valverde; Reis-Filho, Jose Amorim; Santos Sampaio, Claudio Luis; Barros, Francisco				Barros, Francisco/A-3545-2008			Reef fishes captured by recreational spearfishing on reefs of Bahia State, northeast Brazil						BIOTA NEOTROPICA			12	1			179	185					JAN-MAR 2012	2012	Although recreational spearfishing is a growing activity, its impacts are poorly understood. This paper aims to present data on reef fishes captured by recreational spearfishing in the Bahia State, Northeastern Brazil. We analyzed 168 photos of spearfishing conducted in the reefs of this region between 2006 and 2008. A total of 1.121 fish belonging to 48 species were captured in three sub-regions…						0	0	0	0	1676-0611		WOS:000307196200014
J	Soria, G.; Munguia-Vega, A.; Marinone, S. G.; Moreno-Baez, M.; Martinez-Tovar, I.; Cudney-Bueno, R.							Linking bio-oceanography and population genetics to assess larval connectivity						MARINE ECOLOGY-PROGRESS SERIES			463				159	175		10.3354/meps09866			2012	2012	Marine reserves (areas closed to fishing) have been advocated for the management of many species, including the rock scallop Spondylus calcifer in the northern Gulf of California (NGC), Mexico. We developed an explicit coupled biological-oceanographic model (CBOM) to assess connectivity among fished subpopulations of S. calcifer. We focused on the Puerto Penasco corridor, located in the northeast…						0	0	0	0	0171-8630		WOS:000308357300010
J	Rowell, Timothy J.; Schaerer, Michelle T.; Appeldoorn, Richard S.; Nemeth, Michael I.; Mann, David A.; Rivera, Jose A.							Sound production as an indicator of red hind density at a spawning aggregation						MARINE ECOLOGY-PROGRESS SERIES			462				241	250		10.3354/meps09839			2012	2012	Annual spawning aggregations of red hind Epinephelus guttatus form at predictable times and locations and have historically succumbed to overfishing. Monitoring the status and restoration of aggregations is essential for evaluating the effectiveness of fishery management measures. Passive acoustic and diver-based underwater visual census (UVC) techniques were used to develop an efficient method f…						0	0	0	0	0171-8630		WOS:000307723300019
J	Stoner, Allan W.; Davis, Martha H.; Booker, Catherine J.							Abundance and population structure of queen conch inside and outside a marine protected area: repeat surveys show significant declines						MARINE ECOLOGY-PROGRESS SERIES			460				101	114		10.3354/meps09799			2012	2012	Effectiveness of a marine protected area (MPA) in supporting fisheries productivity depends upon replenishment patterns, both in supplying recruits to surrounding fished areas and having a sustainable spawning stock in the MPA. Surveys for queen conch Strombus gigas were made in 2011 at 2 locations in the Exuma Cays, The Bahamas, for direct comparison with surveys conducted during the early 1990s…						1	0	0	1	0171-8630		WOS:000306689800008
J	Alos, J.; Cabanellas-Reboredo, M.; Lowerre-Barbieri, S.							Diel behaviour and habitat utilisation by the pearly razorfish during the spawning season						MARINE ECOLOGY-PROGRESS SERIES			460				207	220		10.3354/meps09755			2012	2012	Despite its small size, the pearly razorfish Xyrichtys novacula (Linnaeus, 1758) supports important targeted recreational and commercial fisheries. Here, we present the first data on the movements of this species obtained using acoustic telemetry in a temperate marine protected area (MPA). The results demonstrate that acoustic telemetry is well suited for behavioural studies, even in species of s…						0	0	0	0	0171-8630		WOS:000306689800016
J	Micheli, Fiorenza; Saenz-Arroyo, Andrea; Greenley, Ashley; Vazquez, Leonardo; Espinoza Montes, Jose Antonio; Rossetto, Marisa; De Leo, Giulio A							Evidence that marine reserves enhance resilience to climatic impacts.						PloS one			7	7			e40832	e40832					2012	2012	Establishment of marine protected areas, including fully protected marine reserves, is one of the few management tools available for local communities to combat the deleterious effect of large scale environmental impacts, including global climate change, on ocean ecosystems. Despite the common hope that reserves play this role, empirical evidence of the effectiveness of local protection against g…						0	0	0	0	1932-6203		MEDLINE:22855690
J	de Souza, Cynthia Diniz; Batista, Vandick da Silva; Fabre, Nidia Noemi							CHARACTERIZATION OF THE FISHERY IN THE SOUTH OF ENVIRONMENTAL PROTECTION AREA OF COSTA DOS CORAIS, ALAGOAS STATE, BRAZIL						BOLETIM DO INSTITUTO DE PESCA			38	2			155	169					2012	2012	Northeast region marine coast have stocks of low abundance but high species richness and commercial value, however there is few published information about its characteristics in reef protected areas. The objective was to characterize the fishery in the south region of the Costa dos Corais marine protected area (MPA), and evaluate the effect of the MPA existence in the fishery yield of the artisa…						0	0	0	0	0046-9939		WOS:000305983700006
J	Comeros-Raynal, Mia T; Choat, John Howard; Polidoro, Beth A; Clements, Kendall D; Abesamis, Rene; Craig, Matthew T; Lazuardi, Muhammad Erdi; McIlwain, Jennifer; Muljadi, Andreas; Myers, Robert F; Nanola, Cleto L Jr; Pardede, Shinta; Rocha, Luiz A; Russell, Barry; Sanciangco, Jonnell C; Stockwell, Brian; Harwell, Heather; Carpenter, Kent E							The likelihood of extinction of iconic and dominant herbivores and detritivores of coral reefs: the parrotfishes and surgeonfishes.						PloS one			7	7			e39825	e39825					2012	2012	Parrotfishes and surgeonfishes perform important functional roles in the dynamics of coral reef systems. This is a consequence of their varied feeding behaviors ranging from targeted consumption of living plant material (primarily surgeonfishes) to feeding on detrital aggregates that are either scraped from the reef surface or excavated from the deeper reef substratum (primarily parrotfishes). In…						0	0	0	0	1932-6203		MEDLINE:22808066
J	Carreiro-Silva, M.; McClanahan, T. R.							Macrobioerosion of dead branching Porites, 4 and 6 years after coral mass mortality						MARINE ECOLOGY-PROGRESS SERIES			458				103	122		10.3354/meps09726			2012	2012	Internal bioerosion by macroborers (polychaetes, sipunculans, bivalves, and sponges) was investigated in dead Porites branches collected from 8 coral reefs along the Kenyan coast, 4 and 6 yr after the 1998 mass mortality of corals. Levels of nutrients, benthic cover, and numbers of grazing and invertebrate-eating fish and sea urchins were measured and evaluated for their influence on macrobioeros…						0	0	0	0	0171-8630		WOS:000305966400007
J	van Deurs, M.; Grome, T. M.; Kaspersen, M.; Jensen, H.; Stenberg, C.; Sorensen, T. K.; Stottrup, J.; Warnar, T.; Mosegaard, H.							Short- and long-term effects of an offshore wind farm on three species of sandeel and their sand habitat						MARINE ECOLOGY-PROGRESS SERIES			458				169	180		10.3354/meps09736			2012	2012	Offshore wind farms (OWFs) are being constructed at a high rate due to a high demand, both economically and politically, for sources of renewable energy. We investigated the short-term and long-term effects of an OWF situated in the North Sea off western Denmark (Horn Rev I; global position: 7.84 degrees E, 55.48 degrees N) on 3 ecologically important species of sandeel. Since sandeels display a …						0	0	0	0	0171-8630		WOS:000305966400012
J	Fitzpatrick, Ben M; Harvey, Euan S; Heyward, Andrew J; Twiggs, Emily J; Colquhoun, Jamie							Habitat specialization in tropical continental shelf demersal fish assemblages.						PloS one			7	6			e39634	e39634					2012	2012	The implications of shallow water impacts such as fishing and climate change on fish assemblages are generally considered in isolation from the distribution and abundance of these fish assemblages in adjacent deeper waters. We investigate the abundance and length of demersal fish assemblages across a section of tropical continental shelf at Ningaloo Reef, Western Australia, to identify fish and f…						0	0	0	0	1932-6203		MEDLINE:22761852
J	Taylor, Brett M; McIlwain, Jennifer L; Kerr, Alexander M							Marine reserves and reproductive biomass: a case study of a heavily targeted reef fish.						PloS one			7	6			e39599	e39599					2012	2012	Recruitment overfishing (the reduction of a spawning stock past a point at which the stock can no longer replenish itself) is a common problem which can lead to a rapid and irreversible fishery collapse. Averting this disaster requires maintaining a sufficient spawning population to buffer stochastic fluctuations in recruitment of heavily harvested stocks. Optimal strategies for managing spawner …						0	0	0	0	1932-6203		MEDLINE:22761836
J	Valls, Audrey; Gascuel, Didier; Guenette, Sylvie; Francour, Patrice				Gascuel, Didier/C-1439-2011			Modeling trophic interactions to assess the effects of a marine protected area: case study in the NW Mediterranean Sea						MARINE ECOLOGY-PROGRESS SERIES			456				201	+		10.3354/meps09701			2012	2012	The present study describes the food web and evaluates the effects of a marine protected area (MPA), the Port-Cros National Park (NW Mediterranean Sea), on the marine ecosystem inside the reserve and its potential to sustain resources outside the reserve. We built an Ecopath model of the Port-Cros MPA which comprised 41 functional groups and represented an average situation for the period 1998 to…						1	0	1	1	0171-8630		WOS:000304914500018
J	Hard, Clara H.; Hoelting, Kristin R.; Christie, Patrick; Pollnac, Richard B.							Collaboration, Legitimacy, and Awareness in Puget Sound MPAs						COASTAL MANAGEMENT			40	3	SI		312	326		10.1080/08920753.2012.677640			2012	2012	Previous studies suggest that collaboration between management agencies and the public has the potential to increase public approval of marine protected areas (MPAs). A social survey was conducted in seven communities near Puget Sound MPAs to (1) measure the degree of perceived collaboration between government agencies and the public at each site, (2) identify factors related to agency-public col…						0	0	0	0	0892-0753		WOS:000304486100008
J	Smith, Sarah Lindley							Toward Inclusive Co-Management: Factors Influencing Stakeholder Participation						COASTAL MANAGEMENT			40	3	SI		327	337		10.1080/08920753.2012.677642			2012	2012	This study investigates stakeholder participation in selected examples of existing co-management arrangements developed to manage marine protected areas (MPAs) within the wider Caribbean. An understanding of the factors contributing to and dynamics of stakeholder participation is essential for promoting effective resource co-management. Data were collected from individuals living within the commu…						0	0	0	0	0892-0753		WOS:000304486100009
J	Nagelkerken, Ivan; Grol, Monique G G; Mumby, Peter J							Effects of marine reserves versus nursery habitat availability on structure of reef fish communities.						PloS one			7	6			e36906	e36906		10.1371/journal.pone.0036906			2012	2012	No-take marine fishery reserves sustain commercial stocks by acting as buffers against overexploitation and enhancing fishery catches in adjacent areas through spillover. Likewise, nursery habitats such as mangroves enhance populations of some species in adjacent habitats. However, there is lack of understanding of the magnitude of stock enhancement and the effects on community structure when bot…						0	0	0	0	1932-6203		MEDLINE:22675474
J	James, N. C.; Goetz, A.; Potts, W. M.; Cowley, P. D.							Temporal variability of a temperate fish assemblage in Africa's oldest marine protected area						AFRICAN JOURNAL OF MARINE SCIENCE			34	1			15	26		10.2989/1814232X.2012.673268			2012	2012	A standardised research-based, shore-angling survey was conducted in the 47-year-old Tsitsikamma National Park Marine Protected Area (MPA) between 1998 and 2005. The aim of this study was to examine variability in community structure, relative abundance (catch per unit effort, CPUE) and size frequency of the shore-angling fish assemblage in this no-take MPA. A total effort of 8 141 angler hours y…						0	0	0	0	1814-232X		WOS:000304353900002
J	Kay, Matthew C.; Lenihan, Hunter S.; Kotchen, Matthew J.; Miller, Christopher J.							Effects of marine reserves on California spiny lobster are robust and modified by fine-scale habitat features and distance from reserve borders						MARINE ECOLOGY-PROGRESS SERIES			451				137	150		10.3354/meps09592			2012	2012	Studies of marine reserves often describe mean differences in organism size or abundance inside versus outside reserves, but recent work indicates that these differences are influenced by habitat and proximity of sites to reserve borders. In this study, we measured mean effects of reserves and the influence of distance from reserve borders on the number and size of legal (>= 82.5 mm carapace leng…						0	0	0	0	0171-8630		WOS:000303908000010
J	Barnett, Adam; Abrantes, Katya G; Seymour, Jamie; Fitzpatrick, Richard							Residency and spatial use by reef sharks of an isolated seamount and its implications for conservation.						PloS one			7	5			e36574	e36574					2012	2012	Although marine protected areas (MPAs) are a common conservation strategy, these areas are often designed with little prior knowledge of the spatial behaviour of the species they are designed to protect. Currently, the Coral Sea area and its seamounts (north-east Australia) are under review to determine if MPAs are warranted. The protection of sharks at these seamounts should be an integral compo…						0	0	0	0	1932-6203		MEDLINE:22615782
J	Nenadovic, Mateja; Johnson, Teresa; Wilson, James							Implementing the Western Gulf of Maine Area Closure: The Role and Perception of Fishers' Ecological Knowledge						ECOLOGY AND SOCIETY			17	1					20	10.5751/ES-04431-170120			2012	2012	The debate about the quality of fishers' ecological knowledge (FEK) and its value to fisheries management has long been present in the literature. This study sought to understand the role of FEK in a particular fisheries management decision in the U. S. and to evaluate the extent that different stakeholder groups recognized and used FEK in fisheries policy creation. The 1998 implementation of the…						0	0	0	0	1708-3087		WOS:000302713700001
J	Silvano, Renato A. M.; Begossi, Alpina				Silvano, Renato/G-1282-2012			Fishermen's local ecological knowledge on Southeastern Brazilian coastal fishes: contributions to research, conservation, and management						NEOTROPICAL ICHTHYOLOGY			10	1			133	147					JAN-MAR 2012	2012	We analyzed fishermen's local ecological knowledge (LEK) about the feeding habits, trophic interactions, habitats, fishing grounds, migration, and reproduction of nine coastal fishes in Buzios Island, southeastern Brazilian coast. We interviewed 39 fishermen using standardized questionnaires. Fishermen's LEK on habitat use and trophic interactions for the studied fishes agreed with the scientific…						0	0	0	0	1679-6225		WOS:000302926400013
J	Verges, Adriana; Tomas, Fiona; Ballesteros, Enric							Interactive effects of depth and marine protection on predation and herbivory patterns						MARINE ECOLOGY-PROGRESS SERIES			450				55	65		10.3354/meps09599			2012	2012	The establishment of marine protected areas (MPAs) worldwide has shown that closure of areas to fishing results in major changes in the structure of marine ecosystems. The removal of high-order consumers by fishing has both direct and indirect effects that can lead to important changes in the strength of trophic interactions. Although the effects of marine protection on biological interactions ar…						0	0	0	0	0171-8630		WOS:000302066000004
J	Hamilton, R. J.; Giningele, M.; Aswani, S.; Ecochard, J. L.							Fishing in the dark-local knowledge, night spearfishing and spawning aggregations in the Western Solomon Islands						BIOLOGICAL CONSERVATION			145	1			246	257		10.1016/j.biocon.2011.11.020			2012-01-12	2012	Within the marine conservation community there is considerable interest in combining local knowledge and science to achieve management objectives. Yet there remain few studies which have examined the merits and caveats of local knowledge, or shown how combining both knowledge systems has resulted in better management outcomes. This study outlines collaborative efforts to conserve fish spawning ag…						1	0	1	1	2012-06-07		WOS:000301092400032
J	Vianna, G. M. S.; Meekan, M. G.; Pannell, D. J.; Marsh, S. P.; Meeuwig, J. J.				Pannell, David/B-4476-2008			Socio-economic value and community benefits from shark-diving tourism in Palau: A sustainable use of reef shark populations						BIOLOGICAL CONSERVATION			145	1			267	277		10.1016/j.biocon.2011.11.022			2012-01-12	2012	Arguments for conservation of sharks based on their role in the maintenance of healthy marine ecosystems have failed to halt the worldwide decline in populations. Instead, the value of sharks as a fishery commodity has severely reduced the abundance of these animals. Conservation may be assisted by the development of an alternative approach that emphasizes the economic value of sharks as a non-ha…						0	0	0	0	2012-06-07		WOS:000301092400034
J	Allegretti, Arren Mendezona; Vaske, Jerry J.; Cottrell, Stuart							Predicting Stakeholder Support for Fishery Policies						COASTAL MANAGEMENT			40	1			20	32		10.1080/08920753.2011.637484			2012	2012	Fisheries management has been used to address declining fisheries and threats to livelihood and food security. Past research suggests that public support for fishery policies is a necessary component for sustaining the long-term success of fisheries management. This study predicted public support by examining fishers' perspectives on co-management and fish catch since the establishment of marine …						0	0	0	0	0892-0753		WOS:000301717400002
J	Heck, Nadine; Dearden, Philip; McDonald, Adrian							Stakeholder Evaluation Priorities for Demonstrating Marine Protected Area Effectiveness at the Pacific Rim National Park Reserve, Canada						COASTAL MANAGEMENT			40	1			55	72		10.1080/08920753.2011.639866			2012	2012	This study addresses the often advocated involvement of stakeholder groups in all aspects of marine protected area management including the development of an evaluation program. In the absence of clear management objectives, the study investigates the opinions of five non-aboriginal stakeholder groups on the importance, purpose and content of an evaluation at Pacific Rim National Park on the West…						0	0	0	0	0892-0753		WOS:000301717400004
J	Kay, Matthew C.; Lenihan, Hunter S.; Guenther, Carla M.; Wilson, Jono R.; Miller, Christopher J.; Shrout, Samuel W.							Collaborative assessment of California spiny lobster population and fishery responses to a marine reserve network						ECOLOGICAL APPLICATIONS			22	1			322	335					2012-01-12	2012	Assessments of the conservation and fisheries effects of marine reserves typically focus on single reserves where sampling occurs over narrow spatiotemporal scales. A strategy for broadening the collection and interpretation of data is collaborative fisheries research (CFR). Here we report results of a CFR program formed in part to test whether reserves at the Santa Barbara Channel Islands, USA, …						2	0	2	2	1051-0761		WOS:000301095600024
J	Tsounis, Georgios; Martinez, Lucia; Bramanti, Lorenzo; Viladrich, Nuria; Gili, Josep-Maria; Martinez, Angela; Rossi, Sergio							Anthropogenic effects on reproductive effort and allocation of energy reserves in the Mediterranean octocoral Paramuricea clavata						MARINE ECOLOGY-PROGRESS SERIES			449				161	U193		10.3354/meps09521			2012	2012	In order to better understand the sources, patterns and consequences of anthropogenic effects on populations of the Mediterranean gorgonian Paramuricea clavata, we examined the proportion of injured colonies among populations exposed to a combination of anthropogenic disturbances (recreational cast fishing, commercial lobster pots, gill nets and SCUBA diving), as well as the physiological respons…						0	0	0	0	0171-8630		WOS:000301231500013
J	Clements, Cody; Bonito, Victor; Grober-Dunsmore, Rikki; Sobey, Milika							Effects of small, Fijian community-based marine protected areas on exploited reef fishes						MARINE ECOLOGY-PROGRESS SERIES			449				233	243		10.3354/meps09554			2012	2012	No-take marine protected areas (MPAs) are commonly applied in community-based management schemes to sustain and enhance coral-reef fisheries. However, many MPAs in Fiji and the South Pacific are relatively small (<= 1 km(2)), and few data exist regarding the effects of these MPAs on populations of exploited species. We used hook-and-line fishing surveys to assess whether 4 relatively small (<1 km…						0	0	0	0	0171-8630		WOS:000301231500019
J	Bond, Mark E; Babcock, Elizabeth A; Pikitch, Ellen K; Abercrombie, Debra L; Lamb, Norlan F; Chapman, Demian D							Reef sharks exhibit site-fidelity and higher relative abundance in marine reserves on the Mesoamerican Barrier Reef.						PloS one			7	3			e32983	e32983					2012	2012	Carcharhinid sharks can make up a large fraction of the top predators inhabiting tropical marine ecosystems and have declined in many regions due to intense fishing pressure. There is some support for the hypothesis that carcharhinid species that complete their life-cycle within coral reef ecosystems, hereafter referred to as "reef sharks", are more abundant inside no-take marine reserves due to …						0	0	0	0	1932-6203		MEDLINE:22412965
J	Rojas-Nazara, Ursula; Gaymer, Carlos F.; Squeo, Francisco A.; Garay-Fluehmann, Rosa; Lopez, David							Combining information from benthic community analysis and social studies to establish no-take zones within a multiple uses marine protected area						AQUATIC CONSERVATION-MARINE AND FRESHWATER ECOSYSTEMS			22	1			74	86		10.1002/aqc.1239			2012-01-12	2012	A decision support tool was used to determine priority sites for marine conservation within the Isla Grande de Atacama multiple uses marine protected area (MUMPA) in northern Chile, based on both biological and social information. Scuba diving, and an unweighted paired-group method using arithmetic average (UPGMA) analyses were used to determine the main benthic communities found in the shallow r…						0	0	0	0	1052-7613		WOS:000300428000010
J	Strain, E. M. A.; Allcock, A. L.; Goodwin, C. E.; Maggs, C. A.; Picton, B. E.; Roberts, D.				Allcock, Louise/A-7359-2012			The long-term impacts of fisheries on epifaunal assemblage function and structure, in a Special Area of Conservation						JOURNAL OF SEA RESEARCH			67	1			58	68		10.1016/j.seares.2011.10.001			2012-01-12	2012	Fisheries can have profound effects on epifaunal community function and structure. We analysed the results from five dive surveys (1975-1976, 1980, 1983, 2003 and 2007), taken in a Special Area of Conservation, Strangford Lough, Northern Ireland before and after a ten year period of increased trawling activity between 1985 and 1995. There were no detectable differences in the species richness or …						0	0	0	0	1385-1101		WOS:000300652300007
J	Madin, Elizabeth M P; Gaines, Steven D; Madin, Joshua S; Link, Anne-Katrin; Lubchenco, Peggy J; Selden, Rebecca L; Warner, Robert R							Do behavioral foraging responses of prey to predators function similarly in restored and pristine foodwebs?						PloS one			7	3			e32390	e32390					2012	2012	Efforts to restore top predators in human-altered systems raise the question of whether rebounds in predator populations are sufficient to restore pristine foodweb dynamics. Ocean ecosystems provide an ideal system to test this question. Removal of fishing in marine reserves often reverses declines in predator densities and size. However, whether this leads to restoration of key functional charac…						0	0	0	0	1932-6203		MEDLINE:22403650
J	Sala, Enric; Ballesteros, Enric; Dendrinos, Panagiotis; Di Franco, Antonio; Ferretti, Francesco; Foley, David; Fraschetti, Simonetta; Friedlander, Alan; Garrabou, Joaquim; Guclusoy, Harun; Guidetti, Paolo; Halpern, Benjamin S; Hereu, Bernat; Karamanlidis, Alexandros A; Kizilkaya, Zafer; Macpherson, Enrique; Mangialajo, Luisa; Mariani, Simone; Micheli, Fiorenza; Pais, Antonio; Riser, Kristin; Rose…							The structure of Mediterranean rocky reef ecosystems across environmental and human gradients, and conservation implications.						PloS one			7	2			e32742	e32742					2012	2012	Historical exploitation of the Mediterranean Sea and the absence of rigorous baselines makes it difficult to evaluate the current health of the marine ecosystems and the efficacy of conservation actions at the ecosystem level. Here we establish the first current baseline and gradient of ecosystem structure of nearshore rocky reefs at the Mediterranean scale. We conducted underwater surveys in 14 …						0	0	0	0	1932-6203		MEDLINE:22393445
J	Eide, Arne							A bioeconomic MPA study based on cellular automata population growth and distribution						FISHERIES RESEARCH			113	1			118	132		10.1016/j.fishres.2011.10.004			2012-01-12	2012	This paper investigates possible biological and economic effects of using marine sanctuaries as a management tool, employing cellular automata techniques to model biological growth and area distribution, assuming open access to the fish stock resources outside the protected area. The cellular automata model incorporates a fish harvest model based on standard assumptions. In agreement with previou…						0	0	0	0	0165-7836		WOS:000299911000012
J	Mireles, Carlos; Nakamura, Royden; Wendt, Dean E.							A collaborative approach to investigate site fidelity, home range, and homing behavior of cabezon (Scorpaenichthys marmoratus)						FISHERIES RESEARCH			113	1			133	142		10.1016/j.fishres.2011.10.008			2012-01-12	2012	Understanding the area use requirements of species targeted for protection by marine protected areas (MPAs) is critical to the future conservation efforts of economically important fish species. Knowledge of home range size and site fidelity is essential in determining whether species will benefit from the protection offered by a MPA, the size of the area needed to protect individuals, and the ex…						0	0	0	0	0165-7836		WOS:000299911000013
J	Allnutt, Thomas F; McClanahan, Timothy R; Andrefouet, Serge; Baker, Merrill; Lagabrielle, Erwann; McClennen, Caleb; Rakotomanjaka, Andry J M; Tianarisoa, Tantely F; Watson, Reg; Kremen, Claire							Comparison of marine spatial planning methods in Madagascar demonstrates value of alternative approaches.						PloS one			7	2			e28969	e28969					2012	2012	The Government of Madagascar plans to increase marine protected area coverage by over one million hectares. To assist this process, we compare four methods for marine spatial planning of Madagascar's west coast. Input data for each method was drawn from the same variables: fishing pressure, exposure to climate change, and biodiversity (habitats, species distributions, biological richness, and bio…						0	0	0	0	1932-6203		MEDLINE:22359534
J	Di Franco, Antonio; Gillanders, Bronwyn M; De Benedetto, Giuseppe; Pennetta, Antonio; De Leo, Giulio A; Guidetti, Paolo							Dispersal patterns of coastal fish: implications for designing networks of marine protected areas.						PloS one			7	2			e31681	e31681					2012	2012	Information about dispersal scales of fish at various life history stages is critical for successful design of networks of marine protected areas, but is lacking for most species and regions. Otolith chemistry provides an opportunity to investigate dispersal patterns at a number of life history stages. Our aim was to assess patterns of larval and post-settlement (i.e. between settlement and recru…						0	0	0	0	1932-6203		MEDLINE:22355388
J	Mumby, Peter J.; Steneck, Robert S.; Edwards, Alasdair J.; Ferrari, Renata; Coleman, Robin; Harborne, Alastair R.; Gibson, Janet P.				Edwards, Alasdair/C-9558-2009; Mumby, Peter/F-9914-2010			Fishing down a Caribbean food web relaxes trophic cascades						MARINE ECOLOGY-PROGRESS SERIES			445				13	24		10.3354/meps09450			2012	2012	The fishing down of marine food webs has been described in pelagic and demersal systems but rarely documented in coral reef environments. We recorded a rapid shift in fish community structure in Belize that accompanied a marked decline in grouper and snapper abundance and a switch towards smaller, less desirable, herbivorous parrotfishes. In a 6 to 7 yr period (2002-2008/09), observations of larg…						1	0	1	1	0171-8630		WOS:000299384100002
J	Lelievre, Stephanie; Jerome, Marc; Maes, Gregory E.; Vaz, Sandrine; Calaivany, Sachidhanandam; Verrez-Bagnis, Veronique							Integrating molecular identification of pelagic eggs with geostatistical mapping to improve the delineation of North Sea fish spawning grounds						MARINE ECOLOGY-PROGRESS SERIES			445				161	172		10.3354/meps09443			2012	2012	Maps of the spawning grounds of commercially important fishes are necessary when assessing the level of connectivity between life stages of fishes and for identifying ecologically valuable marine areas. A first step toward mapping the spawning grounds is a reliable and rapid species identification of pelagic fish eggs to assess the spatio-temporal distribution of spawning aggregations. As many sp…						0	0	0	0	0171-8630		WOS:000299384100013
J	Chang, Kuei-Chao; Hwung, Hwung-Hweng; Chuang, Ching-Ta							An exploration of stakeholder conflict over the Taiwanese marine protected area						OCEAN & COASTAL MANAGEMENT			55				36	41		10.1016/j.ocecoaman.2011.10.008			2012-01-12	2012	Stakeholder conflict is continually increasing as the preservation of marine resources is emphasized comprehensively. Reducing such conflict of stakeholders has become an important issue during the initial stage of planning Marine Protected Areas (MPAs). When it comes to promoting MPAs, cognitive differences and stakeholder conflict are the two main challenges Taiwan faces. This study collects da…						0	0	0	0	0964-5691		WOS:000299761500005
J	Moreno-Baez, Marcia; Cudney-Bueno, Richard; Orr, Barron J.; Shaw, William W.; Pfister, Tad; Torre-Cosio, Jorge; Loaiza, Rene; Rojo, Mario							Integrating the spatial and temporal dimensions of fishing activities for management in the Northern Gulf of California, Mexico						OCEAN & COASTAL MANAGEMENT			55				111	127		10.1016/j.ocecoaman.2011.10.001			2012-01-12	2012	Fishers' knowledge collected through a rapid appraisal process that involved semi-structured interviews in 17 fishing communities in the Northern Gulf of California, Mexico, was used to understand the spatial and temporal scales at which small-scale fisheries operate. This study identifies 43 main target species and group of species and the fishing gear preference(s) for the harvest of each. The …						1	0	1	1	0964-5691		WOS:000299761500013
J	Fox, Helen E.; Mascia, Michael B.; Basurto, Xavier; Costa, Alice; Glew, Louise; Heinemann, Dennis; Karrer, Leah B.; Lester, Sarah E.; Lombana, Alfonso V.; Pomeroy, Robert S.; Recchia, Cheri A.; Roberts, Callum M.; Sanchirico, James N.; Pet-Soede, Lida; White, Alan T.							Reexamining the science of marine protected areas: linking knowledge to action						CONSERVATION LETTERS			5	1			1	10		10.1111/j.1755-263X.2011.00207.x			2012-01-12	2012	Marine protected areas (MPAs) are often implemented to conserve or restore species, fisheries, habitats, ecosystems, and ecological functions and services; buffer against the ecological effects of climate change; and alleviate poverty in coastal communities. Scientific research provides valuable insights into the social and ecological impacts of MPAs, as well as the factors that shape these impac…						1	0	0	1	1755-263X		WOS:000299468900001
J	Ward, Eric J.; Levin, Phillip S.; Lance, Monique M.; Jeffries, Steven J.; Acevedo-Gutierrez, Alejandro							Integrating diet and movement data to identify hot spots of predation risk and areas of conservation concern for endangered species						CONSERVATION LETTERS			5	1			37	47		10.1111/j.1755-263X.2011.00210.x			2012-01-12	2012	Effective management of threatened and endangered species requires an understanding of how species of conservation concern are distributed spatially, as well as the spatial distribution of risks to the population, such as predation or human impacts (fishing, pollution, and loss of habitat). Identifying high-risk areas is particularly important when designing reserves or protected areas. Our novel…						2	0	1	2	1755-263X		WOS:000299468900005
J	Stoner, Allan W.; Davis, Martha H.; Booker, Catherine J.							NEGATIVE CONSEQUENCES OF ALLEE EFFECT ARE COMPOUNDED BY FISHING PRESSURE: COMPARISON OF QUEEN CONCH REPRODUCTION IN FISHING GROUNDS AND A MARINE PROTECTED AREA						BULLETIN OF MARINE SCIENCE			88	1			89	104		10.5343/bms.2011.1044			2012-01-12	2012	Relationships between density of mature adults and mating frequency in queen conch (Strombus gigas Linnaeus, 1758) were observed at three sites in the central Bahamas including one no-take marine reserve (Exuma Gays Land and Sea Park) and two historically important fishing grounds (Berry Islands and Andros Island). No mating was observed in arty one count with density < 47 adults ha(-1), consiste…						2	0	1	2	1977-07-01		WOS:000299355600009
J	Hogan, J. Derek; Thiessen, Roger J.; Sale, Peter F.; Heath, Daniel D.							Local retention, dispersal and fluctuating connectivity among populations of a coral reef fish						OECOLOGIA			168	1			61	71		10.1007/s00442-011-2058-1			2012-01-12	2012	The persistence and resilience of marine populations in the face of disturbances is directly affected by connectivity among populations. Thus, understanding the magnitude and pattern of connections among populations and the temporal variation in these patterns is critical for the effective management and conservation of marine species. Despite recent advances in our understanding of marine connec…						2	0	1	2	0029-8549		WOS:000299058100007
J	Jennings, Simon; Lee, Janette							Defining fishing grounds with vessel monitoring system data						ICES JOURNAL OF MARINE SCIENCE			69	1			51	63		10.1093/icesjms/fsr173			2012-01-12	2012	Methods for defining fishing grounds to support marine spatial planning and management are developed, applied, and compared. The methods are broadly applicable and repeatable because they use vessel monitoring system (VMS) data that are archived and increasingly accessible. For several fleets at regional and national scales, an attempt is made to assess how the choice of criteria for defining gro…						1	0	1	1	1054-3139		WOS:000297867300008
J	Delavenne, Juliette; Metcalfe, Kristian; Smith, Robert J.; Vaz, Sandrine; Martin, Corinne S.; Dupuis, Ludovic; Coppin, Franck; Carpentier, Andre				Martin, Corinne/G-9041-2011; Smith, Robert/D-9660-2011			Systematic conservation planning in the eastern English Channel: comparing the Marxan and Zonation decision-support tools						ICES JOURNAL OF MARINE SCIENCE			69	1			75	83		10.1093/icesjms/fsr180			2012-01-12	2012	The systematic conservation approach is now commonly used for the design of efficient marine protected area (MPA) networks, and identifying these priority areas often involves using specific conservation-planning software. Several such software programmes have been developed in recent years, each differing in the underlying algorithms used. Here, an investigation is made into whether the choice o…						1	0	1	1	1054-3139		WOS:000297867300010
J	Aswani, Shankar; Christie, Patrick; Muthiga, Nyawira A.; Mahon, Robin; Primavera, Jurgenne H.; Cramer, Lori A.; Barbier, Edward B.; Granek, Elise F.; Kennedy, Chris J.; Wolanski, Eric; Hacker, Sally							The way forward with ecosystem-based management in tropical contexts: Reconciling with existing management systems						MARINE POLICY			36	1			1	10					2012-01-12	2012	This paper discusses some of the challenges and opportunities that can arise when implementing ecosystem-based management (EBM) in tropical nations. EBM creates a new series of challenges, problems, and opportunities that must be considered in light of existing governance and management frameworks in a local context. The paper presents five case studies from different parts of the tropical world,…						6	0	2	6	0308-597X		CCC:000296003300001
J	Appleby, Tom; Jones, Peter J. S.				Jones, Peter/C-3322-2008			The marine and coastal access act A-hornets' nest?						MARINE POLICY			36	1			73	77					2012-01-12	2012	The Marine and Coastal Access Act 2009 is now enacted into law. This paper looks at predictions made about new law by one of the authors, Peter Jones, in his paper The Marine Bill: Cornucopia or Pandora's Box [1] and assesses how successful the Act has been in turning aspirations into law. The paper focuses on the following areas: ecosystem protection, stakeholder engagement, marine spatial plann…						1	0	1	1	0308-597X		CCC:000296003300008
J	Emery, Timothy J.; Green, Bridget S.; Gardner, Caleb; Tisdell, John							Are input controls required in individual transferable quota fisheries to address ecosystem based fisheries management objectives?						MARINE POLICY			36	1			122	131					2012-01-12	2012	This study examined the use of Individual Transferable Quotas (ITQs) to effectively manage fishing impacts on all ecosystem components, as required under Ecosystem Based Fisheries Management (EBFM) principles. A consequence of changing from input controls to output-based (catch) management is that the control of the regulating authority tends to be reduced, which may affect the outcomes for ecosy…						0	0	0	0	0308-597X		CCC:000296003300015
J	Ledee, Elodie J. I.; Sutton, Stephen G.; Tobin, Renae C.; De Freitas, Debora M.				Tobin, Renae/B-4677-2012; De Freitas, Debora/E-7561-2011			Responses and adaptation strategies of commercial and charter fishers to zoning changes in the Great Barrier Reef Marine Park						MARINE POLICY			36	1			226	234					2012-01-12	2012	Fishers' responses to changes in resource access through the imposition of marine protected areas can be a critical factor influencing the likelihood of achieving management objectives.Face-to-face interviews with 114 commercial and charter fishers were conducted to investigate their responses and adaptation strategies to the increase in the size and number of no-take zones imposed by the 2004 Gr…						0	0	0	0	0308-597X		CCC:000296003300027
J	Cinner, J. E.; Basurto, Xavier; Fidelman, Pedro; Kuange, John; Lahari, Rachael; Mukminin, Ahmad							Institutional designs of customary fisheries management arrangements in Indonesia, Papua New Guinea, and Mexico						MARINE POLICY			36	1			278	285					2012-01-12	2012	There are considerable efforts by governments, non-governmental organizations (NGOs), and academia to integrate marine conservation initiatives and customary practices, such as taboos that limit resource use. However, these efforts are often pursued without a fundamental understanding of customary institutions. This paper examines the operational rules in use and the presence of institutional des…						1	0	0	1	0308-597X		CCC:000296003300034
J	Seyboth, Elisa; Condini, Mario V.; Albuquerque, Cristiano Q.; Varela, Antonio S., Jr.; Velasco, Gonzalo; Vieira, Joao P.; Garcia, Alexandre M.				Garcia, Alexandre/H-2549-2012			Age, growth, and reproductive aspects of the dusky grouper Mycteroperca marginata (Actinopterygii: Epinephelidae) in a man-made rocky habitat in southern Brazil						NEOTROPICAL ICHTHYOLOGY			9	4			849	856					DEC 26 2011	2011	The dusky grouper, Mycteroperca marginata, is an important commercial marine fish that is currently considered an endangered species worldwide and listed as overexploited in Brazil. Although its reproductive biology has been studied elsewhere, no information is available for populations in its southernmost distribution limit on the Brazilian coast. The present work investigates age structure, gro…						0	0	0	0	1679-6225		WOS:000299068900016
J	Rutkowski, Thais; Schwingel, Paulo Ricardo; Brilha, Renan Todesco; Rodrigues-Ribeiro, Marcelo							Ichthyoplankton of Arvoredo Biological Marine Reserve, Santa Catarina, Brazil						NEOTROPICAL ICHTHYOLOGY			9	4			905	+					DEC 26 2011	2011	Arvoredo Island, located in Santa Catarina state - south Brazil, and its surrounding area were defined as a Conservation Unit (CU) in the category of Biological Reserve since 1990. This research aimed to analyze the inter-annual and seasonal (winter and summer) variations of ichthyoplankton densities at Arvoredo Biology Marine Reserve (ABMR), and their relationship with environmental variables in…						0	0	0	0	1679-6225		WOS:000299068900017
J	Willis, Jay							Modelling swimming aquatic animals in hydrodynamic models						ECOLOGICAL MODELLING			222	23-24			3869	3887		10.1016/j.ecolmodel.2011.10.004			DEC 10 2011	2011	Aquatic life exists between very small passive floating objects such as spores, eggs or seeds which are at the mercy of currents through to animals which swim powerfully enough to overcome most natural currents. There is a corresponding scale of cognitive and sensory capability. Coupling hydrodynamic with Lagrangian particle modelling is well established, as is individual based modelling of anima…						1	0	1	1	0304-3800		WOS:000298455100007
J	Miller, Eric F.; Vilas, David G.; Rankin, Jennifer L.; Pryor, David							Commercial fishery effort for California spiny lobster (Panulirus interruptus) off Orange County, California before State Marine Reserve implementation						Bulletin Southern California Academy of Sciences			110	3			165	176					2012-12-11	2011	The California spiny lobster (Panulirus interruptus) commercial fishing effort along the southern Orange County, California coastline was examined using fishery-independent counts of trap marker buoys and fishery-dependent information submitted to the California Department of Fish and Game in the required commercial logbooks. Buoy counts were conducted in spatially-discrete subsections of the coa…						0	0	0	0	0038-3872; 2162-4534		BIOSIS:PREV201200314207
J	Yochum, Noelle; Starr, Richard M.; Wendt, Dean E.							Utilizing Fishermen Knowledge and Expertise: Keys to Success for Collaborative Fisheries Research						FISHERIES			36	12			593	605					2012-12-11	2011	Collaborative fisheries research provides a mechanism for integrating the unique knowledge, experience, and skills of fishermen and scientists. It is a joint intellectual endeavor that begins with the inception of a project and continues until its final stages, with each group having mutual investment in-and ownership of-the project. Collaborative fisheries research promotes communication and tru…						0	0	0	0	0363-2415		WOS:000299507000003
J	Sonnenholzner, Jorge I.; Lafferty, Kevin D.; Ladah, Lydia B.							Food webs and fishing affect parasitism of the sea urchin Eucidaris galapagensis in the Galapagos						ECOLOGY			92	12			2276	2284					2012-12-11	2011	In the Galapagos Islands, two eulimid snails parasitize the common pencil sea urchin, Eucidaris galapagensis. Past work in the Galapagos suggests that fishing reduces lobster and fish densities and, due to this relaxation of predation pressure, indirectly increases urchin densities, creating the potential for complex indirect interactions between fishing and parasitic snails. To measure indirect …						0	0	0	0	1958-12-01		WOS:000298981300015
J	Bradecina, Raul G.; Soliman, Victor S.; Dioneda, Ronnel R., Sr.; Pelea, Ninfa R.							Profitability and Resource Rent of Multi-Gear Fisheries in Lagonoy Gulf, Philippines						PHILIPPINE AGRICULTURAL SCIENTIST			94	4			401	414					2012-12-11	2011	We evaluated the profitability and resource rent of multi-gear fishery in Lagonoy Gulf, Philippines. Fishing costs obtained from socioeconomic survey and estimates of revenue from gear inventory and catch surveys were used in the benefit-cost analysis. An estimated annual revenue of PhP 1,035 million was obtained from the 26,000 mt production of multi-gear fishery in 2004. The quality of catch an…						0	0	0	0	0031-7454		WOS:000299148800010
J	Bobadilla, Mariana; Alvarez-Borrego, Saul; Avila-Foucat, Sophie; Lara-Valencia, Francisco; Espejel, Ileana							Evolution of environmental policy instruments implemented for the protection of totoaba and the vaquita porpoise in the Upper Gulf of California						ENVIRONMENTAL SCIENCE & POLICY			14	8			998	1007		10.1016/j.envsci.2011.06.003			2012-12-11	2011	We retrospectively analyzed environmental policy instruments decreed by the Mexican federal government for the protection of marine species and ecosystems in the Upper Gulf of California. Totoaba (Totoaba macdonaldii) and the vaquita porpoise (Phocoena sinus) are two priority species in the national and international agendas for marine protection. We observe that while the measures taken by the S…						1	0	1	1	1462-9011		WOS:000298219700007
J	Stein, Janet; Nevill, Jon							Counting Australia's protected rivers						Ecological Management & Restoration			12	3			200	206		10.1111/j.1442-8903.2011.00602.x			2012-12-11	2011	Australia is committed to protecting its important and representative ecosystems. Foremost among protection measures is the network of terrestrial and marine protected areas that comprise the National Reserve System (NRS). However, these reserves were often established with little regard for the conservation needs of riverine ecosystems. There has been no conservation status assessment to determi…						0	0	0	0	1442-7001; 1442-8903		BIOSIS:PREV201200059511
J	Gerber, Leah R.; Estes, James; Crawford, Tara Gancos; Peavey, Lindsey E.; Read, Andrew J.							Managing for extinction? Conflicting conservation objectives in a large marine reserve						CONSERVATION LETTERS			4	6			417	422		10.1111/j.1755-263X.2011.00197.x			2012-12-11	2011	Establishment of the Papahanaumokuakea Marine National Monument (PMNM) in 2006 was heralded as a major advance for marine conservation. The PMNM is one of the largest no-take marine reserves in the world (36,207,439 hectares) and includes all of the Northwestern Hawaiian Islands (NWHI). Despite the protection, within its boundaries one of Hawaii's most charismatic marine species, the endemic Hawa…						0	0	0	0	1755-263X		WOS:000297633100002
J	McCay, Bonnie J.; Jones, Peter J. S.				Jones, Peter/C-3322-2008			Marine Protected Areas and the Governance of Marine Ecosystems and Fisheries						CONSERVATION BIOLOGY			25	6			1130	1133		10.1111/j.1523-1739.2011.01771.x			2012-12-11	2011							0	0	0	0	0888-8892		WOS:000296962700019
J	Mills, Morena; Jupiter, Stacy D.; Pressey, Robert L.; Ban, Natalie C.; Comley, James				Ban, Natalie/C-6938-2009			Incorporating Effectiveness of Community-Based Management in a National Marine Gap Analysis for Fiji						CONSERVATION BIOLOGY			25	6			1155	1164		10.1111/j.1523-1739.2011.01749.x			2012-12-11	2011	Every action in a conservation plan has a different level of effect and consequently contributes differentially to conservation. We examined how several community-based, marine, management actions differed in their contribution to national-level conservation goals in Fiji. We held a workshop with experts on local fauna and flora and local marine management actions to translate conservation goals …						3	0	3	3	0888-8892		WOS:000296962700024
J	Vandeperre, Frederic; Higgins, Ruth M.; Sanchez-Meca, Julio; Maynou, Francesc; Goni, Raquel; Martin-Sosa, Pablo; Perez-Ruzafa, Angel; Afonso, Pedro; Bertocci, Iacopo; Crec'hriou, Romain; D'Anna, Giovanni; Dimech, Mark; Dorta, Carmelo; Esparza, Oscar; Falcon, Jesus M.; Forcada, Aitor; Guala, Ivan; Le Direach, Laurence; Marcos, Concepcion; Ojeda-Martinez, Celia; Pipitone, Carlo; Schembri, Patrick J…				Santos, Ricardo/B-3960-2008; Perez-Ruzafa, Angel/A-3406-2009			Effects of no-take area size and age of marine protected areas on fisheries yields: a meta-analytical approach						FISH AND FISHERIES			12	4			412	426		10.1111/j.1467-2979.2010.00401.x			2012-12-11	2011	Marine protected areas (MPAs) are often promoted as tools for biodiversity conservation as well as for fisheries management. Despite increasing evidence of their usefulness, questions remain regarding the optimal design of MPAs, in particular concerning their function as fisheries management tools, for which empirical studies are still lacking. Using 28 data sets from seven MPAs in Southern Europ…						3	0	2	3	1467-2960		WOS:000297154400004
J	Alvarez-Filip, Lorenzo; Gill, J. A.; Dulvy, N. K.; Perry, A. L.; Watkinson, A. R.; Cote, I. M.				Alvarez-Filip, Lorenzo/C-9552-2011; Dulvy, Nicholas/I-2895-2012			Drivers of region-wide declines in architectural complexity on Caribbean reefs						CORAL REEFS			30	4			1051	1060		10.1007/s00338-011-0795-6			2012-12-11	2011	Severe declines in the cover of live hard coral on reefs have been reported worldwide, and in the Caribbean region, the architectural complexity of coral reefs has also declined markedly. While the drivers of coral cover loss are relatively well understood, little is known about the drivers of regional-scale declines in architectural complexity. We have used a dataset of 49 time series reporting …						1	0	0	1	0722-4028		WOS:000296085300020
J	McClanahan, T. R.							Human and coral reef use interactions: From impacts to solutions?						JOURNAL OF EXPERIMENTAL MARINE BIOLOGY AND ECOLOGY			408	2012-01-02	SI		3	10		10.1016/j.jembe.2011.07.021			NOV 15 2011	2011	The literature on coral reefs and human resource use or fishing is reviewed less from the perspective of summarizing findings but more from the sociological perspective of what scientists chose to study, publish, and cite in journal articles. The motivation was to determine if coral reef science is generating information needed to solve the coral reef climate and fisheries crisis that has been pu…						1	0	1	1	0022-0981		WOS:000298218400002
J	Ban, Natalie C.; Adams, Vanessa M.; Almany, Glenn R.; Ban, Stephen; Cinner, Josh E.; McCook, Laurence J.; Mills, Morena; Pressey, Robert L.; White, Alan				Adams, Vanessa/A-3834-2012; Ban, Natalie/C-6938-2009; Ban, Stephen/C-6903-2009			Designing, implementing and managing marine protected areas: Emerging trends and opportunities for coral reef nations						JOURNAL OF EXPERIMENTAL MARINE BIOLOGY AND ECOLOGY			408	2012-01-02	SI		21	31		10.1016/j.jembe.2011.07.023			NOV 15 2011	2011	Coral reefs are in dire need of effective governance, yet the science and planning of coral reef protected areas largely stem from wealthy, developed nations, with very different social, economic, and cultural characteristics than the nations in which most coral reefs occur. Much has been written about coral reefs and the use of marine protected areas (MPAs) as a management tool, but emerging tre…						3	0	2	3	0022-0981		WOS:000298218400004
J	Armsworth, Paul R.; Block, Barbara A.; Eagle, Josh; Roughgarden, Joan E.							The role of discounting and dynamics in determining the economic efficiency of time-area closures for managing fishery bycatch						THEORETICAL ECOLOGY			4	4			513	526		10.1007/s12080-010-0093-x			2012-11-11	2011	Time-area closures are commonly used to manage fisheries bycatch and involve temporarily closing an area of the ocean to particular fishing gears. We examine conditions in which implementing a time-area closure would increase the economic value of fisheries, focusing on a case study application in the Gulf of Mexico. Pelagic longline fishermen catch the highly valued Atlantic bluefin tuna (Thunnu…						0	0	0	0	1874-1738		WOS:000300160600008
J	McKinley, Andrew C.; Ryan, Laura; Coleman, Melinda A.; Knott, Nathan A.; Clark, Graeme; Taylor, Matthew D.; Johnston, Emma L.				Taylor, Matthew/C-4833-2008			Putting marine sanctuaries into context: a comparison of estuary fish assemblages over multiple levels of protection and modification						AQUATIC CONSERVATION-MARINE AND FRESHWATER ECOSYSTEMS			21	7			636	648		10.1002/aqc.1223			NOV-DEC 2011	2011	1. In recent decades there has been a significant effort to establish marine sanctuaries for the purpose of protecting marine biodiversity and ecological processes. While many studies have demonstrated that marine sanctuaries increase the abundance, diversity, and trophic level of marine fish communities, few have compared these parameters across multiple levels of protection and human modificati…						0	0	0	0	1052-7613		WOS:000297282000005
J	Rice, Jake; Houston, Kim							Representativity and networks of Marine Protected Areas						AQUATIC CONSERVATION-MARINE AND FRESHWATER ECOSYSTEMS			21	7			649	657		10.1002/aqc.1232			NOV-DEC 2011	2011	1. Through recent Decisions of the Convention on Biological Diversity (CBD), States have agreed to establish networks of Marine Protected Areas (MPAs), and that representativity is a necessary feature of the networks.2. There is extensive literature on the intent of these commitments and scientific guidance on network design. The guidance specifies that to have representativity captured in a netw…						0	0	0	0	1052-7613		WOS:000297282000006
J	McClanahan, T. R.; Muthiga, N. A.; Coleman, R. A.							Testing for top-down control: can post-disturbance fisheries closures reverse algal dominance?						AQUATIC CONSERVATION-MARINE AND FRESHWATER ECOSYSTEMS			21	7			658	675		10.1002/aqc.1225			NOV-DEC 2011	2011	1. The response of fish, sea urchins, benthic cover, herbivory, and predation on sea urchins were studied over a 14-year period in and out of a recently established fully closed and fished atoll reef lagoon of the remote Glover's Reef, Belize.2. Closure from fishing was predicted to result in the recovery of predatory fish and herbivores, herbivory rates, and subsequently reduce erect algae and l…						1	0	1	1	1052-7613		WOS:000297282000007
J	Katsanevakis, Stelios; Stelzenmueller, Vanessa; South, Andy; Sorensen, Thomas Kirk; Jones, Peter J. S.; Kerr, Sandy; Badalamenti, Fabio; Anagnostou, Christos; Breen, Patricia; Chust, Guillem; D'Anna, Giovanni; Duijn, Mike; Filatova, Tatiana; Fiorentino, Fabio; Hulsman, Helena; Johnson, Kate; Karageorgis, Aristomenis R.; Kroencke, Ingrid; Mirto, Simone; Pipitone, Carlo; Portelli, Susan; Qiu, Wanfe…				Jones, Peter/C-3322-2008; Chust, Guillem/C-1112-2008			Ecosystem-based marine spatial management: Review of concepts, policies, tools, and critical issues						OCEAN & COASTAL MANAGEMENT			54	11			807	820		10.1016/j.ocecoaman.2011.09.002			2012-11-11	2011	Conventional sectoral management and piecemeal governance are considered less and less appropriate in pursuit of sustainable development. Ecosystem based marine spatial management (EB-MSM) is an approach that recognizes the full array of interactions within an ecosystem, including human uses, rather than considering single issues, species, or ecosystem services in isolation. Marine spatial planni…						5	0	3	5	0964-5691		WOS:000297402400003
J	Shephard, Samuel; Gerritsen, Hans D.; Kaiser, Michel J.; Truszkowska, Holly S.; Reid, David G.							Fishing and environment drive spatial heterogeneity in Celtic Sea fish community size structure						ICES JOURNAL OF MARINE SCIENCE			68	10			2106	2113		10.1093/icesjms/fsr137			2012-11-11	2011	The Large Fish Indicator (LFI) is a univariate size-based indicator of fish community state that has been selected to support the OSPAR fish community Ecological Quality Objective (EcoQO). To operate this EcoQO, a survey-based LFI for each OSPAR region needs to be developed. However, fish communities in these regions are spatially heterogeneous, and there is evidence of within-region spatial vari…						2	0	2	2	1054-3139		WOS:000295985500014
J	Levesque, Juan C.							Commercial fisheries in the northwestern Gulf of Mexico: possible implications for conservation management at the Flower Garden Banks National Marine Sanctuary						ICES JOURNAL OF MARINE SCIENCE			68	10			2175	2190		10.1093/icesjms/fsr155			2012-11-11	2011	Marine resource managers designate marine protected areas (MPAs) to conserve, protect, and enhance fragile marine resources. A form of MPAs sometimes used by resource managers in the United States is a national marine sanctuary (NMS), and for all MPAs, managers need to use updated information during sanctuary management plan reviews (MPRs). In 2006, the Flower Garden Banks NMS (FGBNMS) began its …						0	0	0	0	1054-3139		WOS:000295985500021
J	Mahevas, Stephanie; Vermard, Youen; Hutton, Trevor; Iriondo, Ane; Jadaud, Angelique; Maravelias, Christos D.; Punzon, Antonio; Sacchi, Jacques; Tidd, Alex; Tsitsika, Efthymia; Marchal, Paul; Goascoz, Nicolas; Mortreux, Serge; Roos, David							An investigation of human vs. technology-induced variation in catchability for a selection of European fishing fleets						ICES JOURNAL OF MARINE SCIENCE			68	10			2252	2263		10.1093/icesjms/fsr150			2012-11-11	2011	The impact of the fishing effort exerted by a vessel on a population depends on catchability, which depends on population accessibility and fishing power. The work investigated whether the variation in fishing power could be the result of the technical characteristics of a vessel and/or its gear or whether it is a reflection of inter-vessel differences not accounted for by the technical attribute…						0	0	0	0	1054-3139		WOS:000295985500028
J	Lau, Dickey C. C.; Dumont, Clement P.; Lui, Gilbert C. S.; Qiu, Jian-Wen							Effectiveness of a small marine reserve in southern China in protecting the harvested sea urchin Anthocidaris crassispina: A mark-and-recapture study						BIOLOGICAL CONSERVATION			144	11			2674	2683		10.1016/j.biocon.2011.07.027			2012-11-11	2011	Assessment of the effectiveness of protected areas requires information on population characteristics of the target species. This study used a mark-and-recapture approach to examine the population structure, individual growth, and mortality of the commercially harvested short-spined sea urchin Anthocidaris crassispina in a small (18 ha) no-take marine reserve and two nearby non-protected sites. S…						3	0	3	3	2012-06-07		WOS:000295442900016
J	Afonso, Pedro; Fontes, Jorge; Santos, Ricardo S.				Santos, Ricardo/B-3960-2008			Small marine reserves can offer long term protection to an endangered fish						BIOLOGICAL CONSERVATION			144	11			2739	2744		10.1016/j.biocon.2011.07.028			2012-11-11	2011	The protection of exploited species offered by marine reserves is maximised if individual fish live within the boundaries of the reserve for most of their lives. The direct benefit of this protection, the so called 'reserve effect', is the build-up of biomass through an increase in individual numbers and size. This effect can take several years depending on the life history traits of the target s…						1	0	1	1	2012-06-07		WOS:000295442900024
J	Young, Mary A.; Kvitek, Rikk G.; Iampietro, Pat J.; Garza, Corey D.; Maillet, Richard; Hanlon, Roger T.							Seafloor mapping and landscape ecology analyses used to monitor variations in spawning site preference and benthic egg mop abundance for the California market squid (Doryteuthis opalescens)						JOURNAL OF EXPERIMENTAL MARINE BIOLOGY AND ECOLOGY			407	2			226	233		10.1016/j.jembe.2011.06.017			OCT 31 2011	2011	The California squid fishery is concentrated largely on nearshore squid spawning aggregations. Because of this practice a central concern for sustainable squid fisheries in California is to determine whether reproductive activities and subsequent egg laying occur at rates that are sufficient to support harvestable populations of this sub-annual species. Using high-resolution data collected via ac…						1	0	1	1	0022-0981		WOS:000295707900012
J	McClanahan, Tim R.; Graham, Nicholas A. J.; MacNeil, M. Aaron; Muthiga, Nyawira A.; Cinner, Joshua E.; Bruggemann, J. Henrich; Wilson, Shaun K.							Critical thresholds and tangible targets for ecosystem-based management of coral reef fisheries						PROCEEDINGS OF THE NATIONAL ACADEMY OF SCIENCES OF THE UNITED STATES OF AMERICA			108	41			17230	17233		10.1073/pnas.1106861108			OCT 11 2011	2011	Sustainably managing ecosystems is challenging, especially for complex systems such as coral reefs. This study develops critical reference points for sustainable management by using a large empirical dataset on the coral reefs of the western Indian Ocean to investigate associations between levels of target fish biomass (as an indicator of fishing intensity) and eight metrics of ecosystem state. T…						6	0	5	6	0027-8424		WOS:000295973800069
J	Torres-Irineo, Edgar; Gaertner, Daniel; de Molina, Alicia Delgado; Ariz, Javier							Effects of time-area closure on tropical tuna purse-seine fleet dynamics through some fishery indicators						AQUATIC LIVING RESOURCES			24	4			337	350		10.1051/alr/2011143			2012-10-11	2011	Time-area closures have become a frequently used tool to control fishing effort and protect feeding and spawning areas. However, because time-area closure strata are mainly based on biological and ecological considerations, and do not accounts for fishermen's behavior-at-sea, this type of regulation tool may not entirely achieve its objectives. With the aim of comparing the impact of two differen…						0	0	0	0	0990-7440		WOS:000298634700001
J	Garrison, Thomas M.; Hamel, Owen S.; Punt, Andre E.							Can data collected from marine protected areas improve estimates of life-history parameters?						CANADIAN JOURNAL OF FISHERIES AND AQUATIC SCIENCES			68	10			1761	1777		10.1139/F2011-073			2012-10-11	2011	One of the argued research-related benefits of marine protected areas (MPAs) to fisheries management is that because there is no fishing inside of an MPA, it may be possible to precisely estimate the rate of natural mortality and better determine growth and maturity rates, parameters that are often prespecified in stock assessments. This study assesses the degree to which having an MPA increases …						0	0	0	0	0706-652X		WOS:000298208400006
J	Fitzsimons, James A.							Mislabeling marine protected areas and why it matters-a case study of Australia						CONSERVATION LETTERS			4	5			340	345		10.1111/j.1755-263X.2011.00186.x			OCT-NOV 2011	2011	As part of international obligations and national policies, most nations are working toward establishing comprehensive, adequate, and representative systems of terrestrial and marine protected areas (MPAs). Assigning internationally recognized International Union for Conservation of Nature (IUCN) protected area categories to these MPAs is an important part of this process. The most recent guidanc…						0	0	0	0	1755-263X		WOS:000297632600002
J	Hixon, Mark A.							60 YEARS OF CORAL REEF FISH ECOLOGY: PAST, PRESENT, FUTURE						BULLETIN OF MARINE SCIENCE			87	4			727	765		10.5343/bms.2010.1055			2012-10-11	2011	Revisiting the past 60 yrs of studies of the ecology of fishes on coral reefs reveals successive decadal trends that highlight many lasting contributions relevant to fisheries biology, conservation biology, and ecology in general. The Bulletin of Marine Science was founded in 1951, about the same time SCUBA was first used to study reef fishes, so the 1950s was a decade of initial subtidal explora…						2	0	2	2	1977-07-01		WOS:000296074600003
J	Bohnsack, James A.							IMPACTS OF FLORIDA COASTAL PROTECTED AREAS ON RECREATIONAL WORLD RECORDS FOR SPOTTED SEATROUT, RED DRUM, BLACK DRUM, AND COMMON SNOOK						BULLETIN OF MARINE SCIENCE			87	4			939	970		10.5343/bms.2010.1072			2012-10-11	2011	The present study examines the influence of coastal marine protected areas (MPAs) and statewide fishing regulations on recreational trophy fisheries for four important estuarine game fishes in Florida, where similar to 59% of the mainland coast consists of MPAs. The distribution of International Game Fish Association (IGFA) recreational world records achieved over 70 years (1939-2009) were correl…						2	0	1	2	1977-07-01		WOS:000296074600012
J	Andalecio, Merlina N.							Including coastal resource users in fisheries management evaluation of San Miguel Bay, Philippines						OCEAN & COASTAL MANAGEMENT			54	10			760	770		10.1016/j.ocecoaman.2011.08.004			2012-10-11	2011	This paper examines an approach that integrates the judgment and perceptions of coastal resource users in prioritizing the criteria and indicators for fisheries management impact evaluation. Five criteria with corresponding indicators were identified and selected namely, acceptability, biotic diversity, economic performance, enforceability, and equity. The weights of importance of criteria and in…						0	0	0	0	0964-5691		WOS:000295662000005
J	Yang, Ching-Min; Li, Jan-Jung; Chiang, Hsin-Chieh							Stakeholders' perspective on the sustainable utilization of marine protected areas in Green Island, Taiwan						OCEAN & COASTAL MANAGEMENT			54	10			771	780		10.1016/j.ocecoaman.2011.08.006			2012-10-11	2011	The management implications of Marine Protected Areas (MPAs) cover the interactions and two-way effects between the ecosystem and local residents. Hence, support or resistance from stakeholders is critical to management effectiveness. The inclusion of the perspectives of stakeholders into the MPAs of sustainable utilization can reduce opposition and conflict, improving the effectiveness of MPA ma…						1	0	0	1	0964-5691		WOS:000295662000006
J	Fox, Rebecca J.; Bellwood, David R.							Unconstrained by the clock? Plasticity of diel activity rhythm in a tropical reef fish, Siganus lineatus						FUNCTIONAL ECOLOGY			25	5			1096	1105		10.1111/j.1365-2435.2011.01874.x			2012-10-11	2011	1. In studies of an organism's functional ecology, key behavioural traits such as foraging periodicity are assumed to be uniform across the species. In particular, the fundamental division between diurnal and nocturnal activity patterns is usually assumed to be a fixed one, with organisms demonstrating physiological traits optimised for a particular diel rhythm.2. In this study, we explore the ac…						4	0	4	4	0269-8463		WOS:000295132100018
J	Sieli, G.; Badalucco, C.; Di Stefano, G.; Rizzo, P.; D'Anna, G.; Fiorentino, F.							Biology of red mullet, Mullus barbatus (L. 1758), in the Gulf of Castellammare (NW Sicily, Mediterranean Sea) subject to a trawling ban						JOURNAL OF APPLIED ICHTHYOLOGY			27	5			1218	1225		10.1111/j.1439-0426.2011.01784.x			2012-10-11	2011	Under-or non-exploited areas are useful to aid in evaluating the potential productivity of fish stocks for sustainable fisheries. The Gulf of Castellammare (NW Sicily), where trawling has been banned since 1990, is a good site to study the biology and dynamics of low impacted fish populations. A total of 661 (595 female and 66 male) specimens of red mullet Mullus barbatus (95-245 mm total length,…						0	0	0	0	0175-8659		WOS:000295013300014
J	McClanahan, Timothy R.; Omukoto, Johnstone O.							Comparison of Modern and Historical Fish Catches (AD 750-1400) to Inform Goals for Marine Protected Areas and Sustainable Fisheries						CONSERVATION BIOLOGY			25	5			945	955		10.1111/j.1523-1739.2011.01694.x			2012-10-11	2011	We tested the unsustainable fishing hypothesis that species in assemblages of fish differ in relative abundance as a function of their size, growth rates, vagility, trophic level, and diet by comparing species composition in historical bone middens, modern fisheries, and areas closed to fishing. Historical data came from one of the earliest and most enduring Swahili coastal settlements (approxima…						0	0	0	0	0888-8892		WOS:000294908000012
J	Read, Andrew D.; West, Ronald J.; Haste, Max; Jordan, Alan				West, Ronald/F-6296-2011			Optimizing voluntary compliance in marine protected areas: A comparison of recreational fisher and enforcement officer perspectives using multi-criteria analysis						JOURNAL OF ENVIRONMENTAL MANAGEMENT			92	10			2558	2567		10.1016/j.jenvman.2011.05.022			2012-10-11	2011	A comprehensive list of planning criteria for optimizing compliance in Marine Protected Areas (MPAs) was compiled and used to compare the views of recreational fishers and compliance officers for facilitating voluntary compliance in the Port Stephens - Great Lakes Marine Park (PSGLMP). Expert working groups were tasked separately with: 1) criteria identification and weighting; 2) scoring of no-ta…						1	0	0	1	0301-4797		WOS:000294585900026
J	Hannak, Judith S.; Kompatscher, Sarah; Stachowitsch, Michael; Herler, Juergen							Snorkelling and trampling in shallow-water fringing reefs: Risk assessment and proposed management strategy						JOURNAL OF ENVIRONMENTAL MANAGEMENT			92	10			2723	2733		10.1016/j.jenvman.2011.06.012			2012-10-11	2011	Shallow reefs (reef flats < 1.5 m) in the northern Red Sea are impacted by growing tourism that includes swimmers, snorkellers and reef walkers but have largely been neglected in past studies. We selected a fringing reef along the lagoon of Dahab (Sinai, Egypt) as a model for a management strategy. Point-intercept line transects were used to determine substrate composition, coral community and co…						1	0	0	1	0301-4797		WOS:000294585900045
J	Gonzalez-Olivares, Eduardo; Huincahue-Arcos, Jaime							A two-patch model for the optimal management of a fishing resource considering a marine protected area						NONLINEAR ANALYSIS-REAL WORLD APPLICATIONS			12	5			2489	2499		10.1016/j.nonrwa.2011.02.012			2012-10-11	2011	In this work, we propose and analyze a model related with the management optimization of a renewable resource in aquatic environment composed of two different patches. Spatial distribution of each subpopulation is assumed: one is developed in a marine protected area (MPA) or a marine reserve and the other is located in a zone where fishing with open access may be effected.It is generally assumed …						0	0	0	0	1468-1218		WOS:000292404900002
J	Mclean, Dianne L.; Harvey, Euan S.; Meeuwig, Jessica J.				Harvey, Euan/B-2896-2011; McLean, Dianne/H-2449-2012			Declines in the abundance of coral trout (Plectropomus leopardus) in areas closed to fishing at the Houtman Abrolhos Islands, Western Australia						JOURNAL OF EXPERIMENTAL MARINE BIOLOGY AND ECOLOGY			406	2012-01-02			71	78		10.1016/j.jembe.2011.06.009			SEP 30 2011	2011	This study aimed to assess temporal trends in the abundance and size of the tropical coral trout, Plectropomus leopard us (Lacepede, 1802), in areas open and closed to fishing at the Houtman Abrolhos Islands. Baited remote underwater stereo-video systems (stereo BRUVs) were used to conduct surveys from 2005 to 2009 from shallow and deep sites across four geographically-separated groups of islands…						2	0	2	2	0022-0981		WOS:000294105200010
J	Rocklin, Delphine; Tomasini, Jean-Antoine; Culioli, Jean-Michel; Pelletier, Dominique; Mouillot, David							Spearfishing Regulation Benefits Artisanal Fisheries: The ReGS Indicator and Its Application to a Multiple-Use Mediterranean Marine Protected Area						PLOS ONE			6	9					e23820	10.1371/journal.pone.0023820			SEP 23 2011	2011	The development of fishing efficiency coupled with an increase of fishing effort led to the overexploitation of numerous natural marine resources. In addition to this commercial pressure, the impact of recreational activities on fish assemblages remains barely known. Here we examined the impact of spearfishing limitation on resources in a marine protected area (MPA) and the benefit it provides fo…						0	0	0	0	1932-6203		WOS:000295267100003
J	Staglicic, N.; Matic-Skoko, S.; Pallaoro, A.; Grgicevic, R.; Kraljevic, M.; Tutman, P.; Dragicevic, B.; Dulcic, J.							Long-term trends in the structure of eastern Adriatic littoral fish assemblages: Consequences for fisheries management						ESTUARINE COASTAL AND SHELF SCIENCE			94	3			263	271		10.1016/j.ecss.2011.07.005			SEP 10 2011	2011	Long-term interannual changes in abundance, biomass, diversity and structure of littoral fish assemblages were examined between 1993 and 2009 by experimental trammel net fishing up to six times per year, within the warm period - May to September, at multiple areas along the eastern Adriatic coast with the aim of testing for the consistency of patterns of change across a large spatial scale (simil…						1	0	0	1	0272-7714		WOS:000295543200007
J	Zhou, Shijie; Punt, Andre E.; Deng, Roy; Kienzle, Marco; Rochester, Wayne							Bayesian fishable biomass dynamics models incorporating fished area and relative fish density						CANADIAN JOURNAL OF FISHERIES AND AQUATIC SCIENCES			68	9			1603	1614		10.1139/F2011-083			2012-09-11	2011	Fisheries typically experience large changes over time in fishing effort. The size of the area fished may also change substantially over time, mimicking the trend in fishing effort, and may have major effects on the population dynamics and fishing process. We extend a biomass dynamics model to incorporate fished area and relative fish density in fished and unfished areas. The fishable population …						0	0	0	0	0706-652X		WOS:000296169300007
J	Heck, Nadine; Dearden, Philip; McDonald, Adrian							Stakeholders' expectations towards a proposed marine protected area: A multi-criteria analysis of MPA performance criteria						OCEAN & COASTAL MANAGEMENT			54	9			687	695		10.1016/j.ocecoaman.2011.07.003			2012-09-11	2011	In order to enable effective management of marine protected areas (MPAs), desired MPA achievements need to be identified as early as possible for the development of relevant and clear management goals, objectives and conservation targets. As the definition of MPA success is a social construct, the involvement of multiple groups in this process including government agencies, stakeholders, and othe…						0	0	0	0	0964-5691		WOS:000295314700006
J	Follesa, Maria Cristina; Cannas, Rita; Cau, Alessandro; Cuccu, Danila; Gastoni, Alice; Ortu, Andrea; Pedoni, Claudia; Porcu, Cristina; Cau, Angelo							Spillover effects of a Mediterranean marine protected area on the European spiny lobster Palinurus elephas (Fabricius, 1787) resource						AQUATIC CONSERVATION-MARINE AND FRESHWATER ECOSYSTEMS			21	6			564	572		10.1002/aqc.1213			SEP-OCT 2011	2011	1. An assessment is made of the reserve's benefits within the no-take area of Su Pallosu (Western Mediterranean) and in its neighbouring fishing ground in the 12 years since its establishment.2. Using tag recapture data, Palinurus elephas were found up to 50 km from the centre of the reserve.3. Experimental CPUE inside the no-take area indicated significant increases over time in both abundance a…						0	0	0	0	1052-7613		WOS:000295294600007
J	La Mesa, Gabriele; Molinari, Andrea; Bava, Simone; Finoia, Maria Grazia; Cattaneo-Vietti, Riccardo; Tunesi, Leonardo							Gradients of abundance of sea breams across the boundaries of a Mediterranean marine protected area						FISHERIES RESEARCH			111	2012-01-02			24	30		10.1016/j.fishres.2011.06.008			2012-09-11	2011	In this study we assess the existence of gradients of abundance (density and biomass) of the sea breams Diplodus puntazzo, Diplodus sargus and Diplodus vulgaris across the boundaries of the Portofino MPA (NW Mediterranean) in order to evaluate reserve effect and to provide evidence of spillover. Fish were visually censused in shallow rocky habitat (4-7 m depth) at replicate sites within the diffe…						1	0	1	1	0165-7836		WOS:000295350700003
J	Miethe, Tanja; Pitchford, Jonathan W.; Dytham, Calvin							Modelling the evolutionary effects of a coastal marine reserve on different ecological guilds of fish						JOURNAL OF THE MARINE BIOLOGICAL ASSOCIATION OF THE UNITED KINGDOM			91	6	SI		1369	1380		10.1017/S0025315410001268			2012-09-11	2011	Marine reserves are used as a management tool to ensure sustainability of fish stocks. Using an individual-based model, we compare the evolutionary effect of a reserve located on a nursery ground, spawning ground, feeding ground, or in a year-round habitat for sedentary species. We model the evolution of life-history traits, specifically size at maturation and site fidelity. Within species, indiv…						0	0	0	0	0025-3154		WOS:000294079400026
J	Marshell, A.; Mills, J. S.; Rhodes, K. L.; McIlwain, J.							Passive acoustic telemetry reveals highly variable home range and movement patterns among unicornfish within a marine reserve						CORAL REEFS			30	3			631	642		10.1007/s00338-011-0770-2			2012-09-11	2011	Marine reserves are the primary management tool for Guam's reef fish fishery. While a build-up of fish biomass has occurred inside reserve boundaries, it is unknown whether reserve size matches the scale of movement of target species. Using passive acoustic telemetry, we quantified movement patterns and home range size of two heavily exploited unicornfish Naso unicornis and Naso lituratus. Fiftee…						2	0	2	2	0722-4028		WOS:000293536600009
J	Peterson, Angelie M.; Stead, Selina M.							Rule breaking and livelihood options in marine protected areas						ENVIRONMENTAL CONSERVATION			38	3			342	352		10.1017/S0376892911000178			2012-09-11	2011	Two main drivers of global trends in noncompliance of marine protected areas regulations are food and income security. Declines in fish stocks have resulted in greater concerns for food security, especially in developing and coastal areas, and calls for environmental conservation are growing. Planning of marine protected areas has traditionally been based on biological and ecological data, only r…						0	0	0	0	0376-8929		WOS:000296086500008
J	White, J. Wilson; Botsford, Louis W.; Baskett, Marissa L.; Barnett, Lewis A. K.; Barr, R. Jeffrey; Hastings, Alan							Linking models with monitoring data for assessing performance of no-take marine reserves						FRONTIERS IN ECOLOGY AND THE ENVIRONMENT			9	7			390	399		10.1890/100138			2012-09-11	2011	No-take marine reserves are an increasingly popular conservation and management tool. Assessing reserve performance in an adaptive management framework ideally involves predicting the response of populations and communities to reserves (typically in the design process) and testing predicted outcomes against observations. Here we compare existing modeling and empirical studies on no-take marine re…						2	0	2	2	1540-9295		WOS:000294978500016
J	Edgar, Graham J.; Banks, Stuart A.; Bessudo, Sandra; Cortes, Jorge; Guzman, Hector M.; Henderson, Scott; Martinez, Camilo; Rivera, Fernando; Soler, German; Ruiz, Diego; Zapata, Fernando A.							Variation in reef fish and invertebrate communities with level of protection from fishing across the Eastern Tropical Pacific seascape						GLOBAL ECOLOGY AND BIOGEOGRAPHY			20	5			730	743		10.1111/j.1466-8238.2010.00642.x			2012-09-11	2011	Aim To quantify general differences in reef community structure between well-enforced and poorly enforced marine protected areas (MPAs) and fished sites across the Eastern Tropical Pacific (ETP) regional seascapeLocation The Pacific continental margin and oceanic islands of Costa Rica, Panama, Colombia and Ecuador, including World Heritage sites at Galapagos, Coiba, Cocos and MalpeloMethods Densi…						4	0	3	4	1466-822X		WOS:000293701300008
J	Rouphael, Anthony B.; Abdulla, Ameer; Said, Yasser							A framework for practical and rigorous impact monitoring by field managers of marine protected areas						ENVIRONMENTAL MONITORING AND ASSESSMENT			180	2012-01-04			557	572		10.1007/s10661-010-1805-9			2012-09-11	2011	Monitoring is a crucial component of conservation in marine protected areas (MPAs) as it allows managers to detect changes to biodiversity and to infer cause of change. However, the complexities of sampling designs and associated statistical analyses can impede implementation of monitoring by managers. Two monitoring frameworks commonly used in marine environments are statistical testing and para…						0	0	0	0	0167-6369		WOS:000293410200038
J	Hobday, Alistair J.				Hobday, Alistair/A-1460-2012			Sliding baselines and shuffling species: implications of climate change for marine conservation						MARINE ECOLOGY-AN EVOLUTIONARY PERSPECTIVE			32	3			392	403		10.1111/j.1439-0485.2011.00459.x			2012-09-11	2011	The concept of shifting or sliding baselines refers to the way that significant changes to an ecological system are mistakenly measured against a previous baseline, which may be significantly different from the original state of the system. The concept assumes an 'original state' exists and that a return to that state might be possible, if it could be determined and there was sufficient control o…						0	0	0	0	0173-9565		WOS:000293560400013
J	Jacinto, David; Cruz, Teresa; Silva, Teresa; Castro, Joao J.				Jacinto, David/B-2225-2012			Management of the stalked barnacle (Pollicipes pollicipes) fishery in the Berlengas Nature Reserve (Portugal): evaluation of bag and size limit regulation measures						SCIENTIA MARINA			75	3			439	445		10.3989/scimar.2011.75n3439			2012-09-11	2011	The stalked barnacle Pollicipes pollicipes (Gmelin, 1790) is an important shellfish resource in Portugal. Due to the social-economic importance of barnacle harvesting, a management plan aimed at achieving a controlled and sustainable activity (including temporal and spatial closures, rotational harvesting, a limited number of harvesting licenses, bag and size limits for catches and catch reportin…						0	0	0	0	0214-8358		WOS:000293661300003
J	De Juan, Silvia; Demestre, Montserrat; Sanchez, Pilar							Exploring the degree of trawling disturbance by the analysis of benthic communities ranging from a heavily exploited fishing ground to an undisturbed area in the NW Mediterranean						SCIENTIA MARINA			75	3			507	516		10.3989/scimar.2011.75n3507			2012-09-11	2011	This study focuses on 4 sites in the northwestern Mediterranean to investigate the response of benthic fauna across a gradient of trawling impact. One site was located in a heavily exploited fishing ground. The second site was enclosed in the fishing ground but had not been trawled in twenty years. The third site was located adjacent to a marine protected area and was subjected to occasional traw…						0	0	0	0	0214-8358		WOS:000293661300009
J	Ceccarelli, Daniela M.; Beger, Maria; Kospartov, Marie C.; Richards, Zoe T.; Birrell, Chico L.							Population trends of remote invertebrate resources in a marine reserve: trochus and holothurians at Ashmore Reef						Pacific Conservation Biology			17	2012-01-02			132	140					FAL 2011	2011	Marine protected areas (MPAs) have a high capacity to protect fish and invertebrate resources, given adequate surveillance and enforcement. Ashmore Reef National Nature Reserve (Ashmore Reef) was closed to commercial fishing and harvesting of invertebrates such as trochus (Trochus niloticus) and holothurians in 1983. We evaluate population trends in trochus and holothurians during eight years of …						0	0	0	0	1038-2097		BIOSIS:PREV201100531000
J	Pompa, Sandra; Ehrlich, Paul R.; Ceballos, Gerardo							Global distribution and conservation of marine mammals						PROCEEDINGS OF THE NATIONAL ACADEMY OF SCIENCES OF THE UNITED STATES OF AMERICA			108	33			13600	13605		10.1073/pnas.1101525108			AUG 16 2011	2011	We identified 20 global key conservation sites for all marine (123) and freshwater (6) mammal species based on their geographic ranges. We created geographic range maps for all 129 species and a Geographic Information System database for a 46,184 1 x 1 grid-cells, similar to 10,000-km(2). Patterns of species richness, endemism, and risk were variable among all species and species groups. Interest…						5	0	5	5	0027-8424		WOS:000293895100051
J	Gao, Lei; Hailu, Atakelty				Hailu, Atakelty/G-1687-2010; Gao, Lei/F-9698-2010			Evaluating the effects of area closure for recreational fishing in a coral reef ecosystem: The benefits of an integrated economic and biophysical modeling						ECOLOGICAL ECONOMICS			70	10			1735	1745		10.1016/j.ecolecon.2011.04.014			AUG 15 2011	2011	This paper presents an integrated agent-based model of recreational fishing behavior within a reef ecosystem as a platform for the evaluation of recreational fishing management strategies. Angler behavior is described using econometrically estimated site choice models, with site choice among anglers driven by site attributes and angler characteristics. The biophysical model represents the marine …						3	0	0	3	0921-8009		WOS:000293262000005
J	Aburto-Oropeza, Octavio; Erisman, Brad; Galland, Grantly R.; Mascarenas-Osorio, Ismael; Sala, Enric; Ezcurra, Exequiel							Large Recovery of Fish Biomass in a No-Take Marine Reserve						PLOS ONE			6	8					e23601	10.1371/journal.pone.0023601			AUG 12 2011	2011	No-take marine reserves are effective management tools used to restore fish biomass and community structure in areas depleted by overfishing. Cabo Pulmo National Park (CPNP) was created in 1995 and is the only well enforced no-take area in the Gulf of California, Mexico, mostly because of widespread support from the local community. In 1999, four years after the establishment of the reserve, ther…						3	0	2	3	1932-6203		WOS:000293953500058
J	Januchowski-Hartley, Fraser A.; Graham, Nicholas A. J.; Feary, David A.; Morove, Tau; Cinner, Joshua E.							Fear of Fishers: Human Predation Explains Behavioral Changes in Coral Reef Fishes						PLOS ONE			6	8					e22761	10.1371/journal.pone.0022761			AUG 10 2011	2011	Prey flight decisions in response to predation risk are increasingly being considered in conservation and management decisions in the terrestrial realm, but are rarely considered in marine systems. This field-based study investigated how the behavioral response of coral reef fish families varied along a gradient of subsistence fishing pressure in Papua New Guinea. Specifically, we examined how fi…						3	0	2	3	1932-6203		WOS:000295454200019
J	Ruiz, Diego J.; Wolff, Matthias							The Bolivar Channel Ecosystem of the Galapagos Marine Reserve: Energy flow structure and role of keystone groups						JOURNAL OF SEA RESEARCH			66	2			123	134		10.1016/j.seares.2011.05.006			2012-08-11	2011	The Bolivar Channel Ecosystem (BCE) is among the most productive zones in the Galapagos Marine Reserve (GMR). It is exposed to relatively cool, nutrient-rich waters of the Cromwell current, which are brought to the photic zone through topographic upwelling. The BCE is characterized by a heterogeneous rocky reef habitat covered by dense algae beds and inhabited by numerous invertebrate and fish sp…						1	0	1	1	1385-1101		WOS:000295149700009
J	Boulcott, Philip; Howell, Trevor R. W.							The impact of scallop dredging on rocky-reef substrata						FISHERIES RESEARCH			110	3			415	420		10.1016/j.fishres.2011.05.006			2012-08-11	2011	Impact studies examining scallop dredging have been limited to loose-sediment habitats typical of most scallop grounds. However, it is likely that rocky-reef habitats also suffer damage from dredging activity since commercially viable grounds are often found in close proximity. This study presents a photographic survey of four experimental tows performed in two rocky-reef biotopes. Survey images …						0	0	0	0	0165-7836		WOS:000293870400004
J	Kvamsdal, Sturla F.							EXOGENOUS SHOCKS AND MARINE RESERVES						NATURAL RESOURCE MODELING			24	3			316	334		10.1111/j.1939-7445.2011.00093.x			2012-08-11	2011	The impact on the value of a fishery from exogenous shocks is investigated. Part of the habitat is protected by a marine reserve, while the remaining fishery is managed by optimal, total allowable catch quotas. Shocks of different, spatial nature and with different probability distributions are investigated. The results suggest that reserves are of minor interest as a management tool when shocks …						2	0	1	2	0890-8575		WOS:000293704400002
J	Carr, Mark H.; Woodson, Clifton B.; Cheriton, Olivia M.; Malone, Daniel; McManus, Margaret A.; Raimondi, Peter T.							Knowledge through partnerships: integrating marine protected area monitoring and ocean observing systems						FRONTIERS IN ECOLOGY AND THE ENVIRONMENT			9	6			342	350		10.1890/090096			2012-08-11	2011	Escalating concern over the state of coastal marine ecosystems highlights the need for a better understanding of how such systems are structured by physical, biological, and chemical processes, and how human activities interact with these processes. Marine protected area (MPA) networks are being established around the world, in an effort to protect marine populations, communities, and ecosystems.…						0	0	0	0	1540-9295		WOS:000293532500021
J	Mockrin, Miranda H.; Redford, Kent H.							Potential for spatial management of hunted mammal populations in tropical forests						CONSERVATION LETTERS			4	4			255	263		10.1111/j.1755-263X.2011.00173.x			AUG-SEP 2011	2011	Unsustainable hunting in tropical forests threatens biodiversity and rural livelihoods, yet managing these harvests in remote forests with low scientific capacity and funding is challenging. In response, some conservationists propose managing harvests through spatial management, a system of establishing no-take zones where hunting is not allowed. Spatial management was commonly used in customary …						0	0	0	0	1755-263X		WOS:000293233200002
J	Cinner, J. E.							Social-ecological traps in reef fisheries						GLOBAL ENVIRONMENTAL CHANGE-HUMAN AND POLICY DIMENSIONS			21	3	SI		835	839		10.1016/j.gloenvcha.2011.04.012			2012-08-11	2011							6	0	2	6	0959-3780		WOS:000293549000008
J	Evans, Louisa; Cherrett, Nia; Pemsl, Diemuth							Assessing the impact of fisheries co-management interventions in developing countries: A meta-analysis						JOURNAL OF ENVIRONMENTAL MANAGEMENT			92	8			1938	1949		10.1016/j.jenvman.2011.03.010			2012-08-11	2011	Co-management is now established as a mainstream approach to small-scale fisheries management across the developing world. A comprehensive review of 204 potential cases reveals a lack of impact assessments of fisheries co-management. This study reports on a meta-analysis of the impact of fisheries co-management in developing countries in 90 sites across 29 case-studies. The top five most frequent…						3	0	2	3	0301-4797		WOS:000291774600006
J	Bassett, D.; Montgomery, J.				Montgomery, John/D-4310-2009			Home range use and movement patterns of the yellow moray eel Gymnothorax prasinus						JOURNAL OF FISH BIOLOGY			79	2			520	525		10.1111/j.1095-8649.2011.03018.x			2012-08-11	2011	This study investigated the movement patterns of yellow moray eels Gymnothorax prasinus using acoustic telemetry. Gymnothorax prasinus were found to use multiple sites within a localized area or home range. (C) 2011 The Authors Journal of Fish Biology (C) 2011 The Fisheries Society of the British Isles						0	0	0	0	0022-1112		WOS:000293076100012
J	Howarth, Leigh M.; Wood, Howard L.; Turner, Alexander P.; Beukers-Stewart, Bryce D.							Complex habitat boosts scallop recruitment in a fully protected marine reserve						MARINE BIOLOGY			158	8			1767	1780		10.1007/s00227-011-1690-y			2012-08-11	2011	This study investigated the effects of a fully protected marine reserve on commercially valuable scallops and benthic habitats in Lamlash Bay, Isle of Arran, United Kingdom. Dive surveys found the abundance of juvenile scallops to be greater within the marine reserve than outside. A novel multivariate approach, based upon neural networks and generalised linear models, revealed the greater abundan…						2	0	1	2	0025-3162		WOS:000293001400009
J	Edwards, Charles T. T.; Plaganyi, Eva E.				Plaganyi, Eva/C-5130-2011			Protecting old fish through spatial management: is there a benefit for sustainable exploitation?						JOURNAL OF APPLIED ECOLOGY			48	4			853	863		10.1111/j.1365-2664.2011.01961.x			2012-08-11	2011	1. Spatially defined restrictions on fishing activity are considered to be important for biodiversity conservation in marine ecosystems. However, it is uncertain whether such restrictions also benefit wider populations of exploited fish species, in terms of a reduced risk of overexploitation. Since fishing leads to contraction of the age structure, one potential benefit of protection is recovery …						2	0	2	2	0021-8901		WOS:000292331100005
J	Mangi, Stephen C.; Rodwell, Lynda D.; Hattam, Caroline							Assessing the Impacts of Establishing MPAs on Fishermen and Fish Merchants: The Case of Lyme Bay, UK						AMBIO			40	5			457	468		10.1007/s13280-011-0154-4			2012-07-11	2011	Shortly after the implementation of a marine protected area (MPA) in Lyme Bay in 2008, inside which scallop dredging and bottom trawling is prohibited, a socio-economic impact assessment was initiated. This article presents the initial findings from this study. The aim was to understand the costs and benefits to fishermen and fish merchants of establishing the MPA. These were assessed using a com…						0	0	0	0	0044-7447		WOS:000291651100003
J	Guo, Xianhua; Cui, Shenghui; Lin, Tao; Song, Yu				Lin, Tao/B-7256-2009			The ecological risk assessment of the Chinese White Dolphins in Xiamen coastal waters						AQUATIC ECOSYSTEM HEALTH & MANAGEMENT			14	3			298	304		10.1080/14634988.2011.598111			JUL-SEP 2011	2011	To protect the endangered Chinese White Dolphins in Xiamen coastal waters, an ecological risk assessment was made. This assessment was based on an evaluation framework using the Driver-Pressure-State-Impact-Response method, integrated with the guidelines given by the United States Environmental Protection Agency. Aside from chemical stressors, other factors (including environmental investment, se…						0	0	0	0	1463-4988		WOS:000295419900011
J	Dance, Michael A.; Patterson, William F., III; Addis, Dustin T.							FISH COMMUNITY AND TROPHIC STRUCTURE AT ARTIFICIAL REEF SITES IN THE NORTHEASTERN GULF OF MEXICO						BULLETIN OF MARINE SCIENCE			87	3			301	324		10.5343/bms.2010.1040			2012-07-11	2011	Fish community and trophic structure were examined quarterly from fall 2004 through spring 2007 at 27 artificial reef sites located 15-20 mi south of Pensacola, Florida. Location of study sites was not reported to the public when reef modules were deployed in 2003, thus sites were presumed to be unfished. Community structure estimates were derived from video sampling that was performed with a mic…						1	0	1	1	1977-07-01		WOS:000292994500002
J	Moland, Even; Olsen, Esben Moland; Andvord, Kristian; Knutsen, Jan Atle; Stenseth, Nils Chr.				Olsen, Esben/B-1894-2012			Home range of European lobster (Homarus gammarus) in a marine reserve: implications for future reserve design						CANADIAN JOURNAL OF FISHERIES AND AQUATIC SCIENCES			68	7			1197	1210		10.1139/F2011-053			2012-07-11	2011	Marine reserves are perceived as a critical component in successful rebuilding of overharvested marine populations. Such efforts can be particularly successful in species with limited movement rates. However, long-term data on movement is sparse for most marine species. Here, we investigated space use in European lobster (Homarus gammarus) by ultrasonic tracking in a reserve on the Norwegian Skag…						3	0	2	3	0706-652X		WOS:000295185400005
J	Pita, Cristina; Pierce, Graham J.; Theodossiou, Ioannis; Macpherson, Karen							An overview of commercial fishers' attitudes towards marine protected areas						HYDROBIOLOGIA			670	1			289	306		10.1007/s10750-011-0665-9			2012-07-11	2011	Marine protected areas (MPAs) are attracting widespread attention worldwide as a tool for fishery management and marine ecosystem conservation. The establishment of MPAs has increased greatly in recent years mostly due to international commitments to the establishment of a global network of MPAs by 2012. MPAs have the potential to strongly affect the fishing industry, and their success depends, a…						1	0	1	1	0018-8158		WOS:000291222700018
J	Garofalo, G.; Fortibuoni, T.; Gristina, M.; Sinopoli, M.; Fiorentino, F.							Persistence and co-occurrence of demersal nurseries in the Strait of Sicily (central Mediterranean): Implications for fishery management						JOURNAL OF SEA RESEARCH			66	1			29	38		10.1016/j.seares.2011.04.008			2012-07-11	2011	This study investigated the nurseries of seven commercially important demersal species of the northern sector of the Strait of Sicily (central Mediterranean): red mullet. European hake, horned octopus, deep-water rose shrimp, greater forkbeard. Norway lobster and giant red shrimp. An eleven-year series of data collected through experimental trawling in the Strait of Sicily during spring and autum…						2	0	2	2	1385-1101		WOS:000292794000004
J	Dick, Dorothy M.; Hines, Ellen M.							Using distance sampling techniques to estimate bottlenose dolphin (Tursiops truncatus) abundance at Turneffe Atoll, Belize						MARINE MAMMAL SCIENCE			27	3			606	621		10.1111/j.1748-7692.2010.00435.x			2012-07-11	2011	Reliable abundance estimates are critical for management and conservation of coastal small cetaceans. This is particularly important in developing countries where coastal human populations are increasing, the impacts of anthropogenic activities are often unknown, and the resources necessary to assess coastal cetaceans are limited. We adapted ship-based line transect methods to small-boat surveys …						0	0	0	0	0824-0469		WOS:000292825200016
J	Samhouri, Jameal F.; Levin, Phillip S.; James, C. Andrew; Kershner, Jessi; Williams, Greg							Using existing scientific capacity to set targets for ecosystem-based management: A Puget Sound case study						MARINE POLICY			35	4			508	518		10.1016/j.marpol.2010.12.002			2012-07-11	2011	Human actions have altered the structure and function of coastal ecosystems worldwide. In many locations, the overall portfolio of goods, cultural amenities, and supporting services provided by the marine environment has deteriorated. Ecosystem-based management (EBM) offers significant promise for addressing these issues because it is a comprehensive and integrated approach designed to reconcile …						1	0	1	1	0308-597X		CCC:000289604000011
J	Vila-Nova, Daniele Alves; Bender, Mariana Gomes; Carvalho-Filho, Alfredo; Leite Ferreira, Carlos Eduardo; Floeter, Sergio Ricardo				Floeter, Sergio/B-1438-2012			The Use of Non-reef Habitats by Brazilian Reef Fish Species: Considerations for the Design of Marine Protected Areas						NATUREZA & CONSERVACAO			9	1			79	86		10.4322/natcon.2011.010			2012-07-11	2011	Many reef fish use non-reef habitats (e.g. mangroves, estuaries, and seagrass/algae beds) during their life cycle. In this study we determined how many, and which percentage of Brazilian reef fish species that make use of non-reef habitats are considered threatened (i.e. red-listed) and/or targeted by fisheries. We compiled data for 559 reef fish species, which were sorted by habitat use, threat …						0	0	0	0	1679-0073		WOS:000293259300010
J	Sparks, Tim H.; Butchart, Stuart H. M.; Balmford, Andrew; Bennun, Leon; Stanwell-Smith, Damon; Walpole, Matt; Bates, Nicholas R.; Bomhard, Bastian; Buchanan, Graeme M.; Chenery, Anna M.; Collen, Ben; Csirke, Jorge; Diaz, Robert J.; Dulvy, Nicholas K.; Fitzgerald, Claire; Kapos, Valerie; Mayaux, Philippe; Tierney, Megan; Waycott, Michelle; Wood, Louisa; Green, Rhys E.				Kapos, Valerie/G-3136-2010; Dulvy, Nicholas/I-2895-2012; Collen, Ben/D-5055-2011			Linked indicator sets for addressing biodiversity loss						ORYX			45	3			411	419		10.1017/S003060531100024X			2012-07-11	2011	The target adopted by world leaders of significantly reducing the rate of biodiversity loss by 2010 was not met but this stimulated a new suite of biodiversity targets for 2020 adopted by the Parties to the Convention on Biological Diversity (CBD) in October 2010. Indicators will be essential for monitoring progress towards these targets and the CBD will be defining a suite of relevant indicators…						1	0	1	1	0030-6053		WOS:000294249900018
J	Zhang, Junjie; Smith, Martin D.							Heterogeneous Response to Marine Reserve Formation: A Sorting Model approach						ENVIRONMENTAL & RESOURCE ECONOMICS			49	3			311	325		10.1007/s10640-010-9434-x			2012-07-11	2011	The bioeconomic impacts of spatial fisheries management hinge on how fishing vessels reallocate their effort over space. However, empirical studies face two challenges: heterogeneous behavioral responses and unobservable resource abundance. This paper addresses these two problems simultaneously by using an unusual data set and an estimation technique developed in the industrial organization liter…						2	0	1	2	0924-6460		CCC:000291393700001
J	Mouillot, David; Albouy, Camille; Guilhaumon, Francois; Lasram, Frida Ben Rais; Coll, Marta; Devictor, Vincent; Meynard, Christine N.; Pauly, Daniel; Tomasini, Jean Antoine; Troussellier, Marc; Velez, Laure; Watson, Reg; Douzery, Emmanuel J. P.; Mouquet, Nicolas				Guilhaumon, Francois/C-3240-2009; Meynard, Christine/B-2082-2010; Watson, Reg/F-4850-2012; albouy, camille/H-9317-2012			Protected and Threatened Components of Fish Biodiversity in the Mediterranean Sea						CURRENT BIOLOGY			21	12			1044	1050		10.1016/j.cub.2011.05.005			JUN 21 2011	2011	The Mediterranean Sea (0.82% of the global oceanic surface) holds 4%-18% of all known marine species (similar to 17,000), with a high proportion of endemism [1, 2]. This exceptional biodiversity is under severe threats [1] but benefits from a system of 100 marine protected areas (MPAs). Surprisingly, the spatial congruence of fish biodiversity hot spots with this MPA system and the areas of high …						5	0	3	5	0960-9822		WOS:000292221900022
J	Poos, J. J.; Braennstroem, A.; Dieckmann, U.				Dieckmann, Ulf/E-1424-2011; Brannstrom, Ake /E-7850-2011; Poos, Jan Jaap/B-9940-2009			Harvest-induced maturation evolution under different life-history trade-offs and harvesting regimes						JOURNAL OF THEORETICAL BIOLOGY			279	1			102	112		10.1016/j.jtbi.2011.03.001			JUN 21 2011	2011	The potential of harvesting to induce adaptive changes in exploited populations is now increasingly recognized. While early studies predicted that elevated mortalities among larger individuals select for reduced maturation size, recent theoretical studies have shown conditions under which other, more complex evolutionary responses to size-selective mortality are expected. These new predictions ar…						3	0	3	3	0022-5193		WOS:000290602300011
J	Grech, Alana; Coles, Rob				Grech, Alana/E-9464-2011			Interactions between a Trawl Fishery and Spatial Closures for Biodiversity Conservation in the Great Barrier Reef World Heritage Area, Australia						PLOS ONE			6	6					e21094	10.1371/journal.pone.0021094			JUN 13 2011	2011	Background: The Queensland East Coast Otter Trawl Fishery (ECOTF) for penaeid shrimp fishes within Australia's Great Barrier Reef World Heritage Area (GBRWHA). The past decade has seen the implementation of conservation and fisheries management strategies to reduce the impact of the ECOTF on the seabed and improve biodiversity conservation. New information from electronic vessel location monitori…						1	0	1	1	1932-6203		WOS:000291663300039
J	Matic-Skoko, Sanja; Staglicic, Nika; Kraljevic, Miro; Pallaoro, Armin; Tutman, Pero; Dragicevic, Branko; Grgicevic, Robert; Dulcic, Jakov							Croatian artisanal fisheries and the state of it's littoral resources on the doorstep of entering the EU: effectiveness of conventional management and perspectives for the future						ACTA ADRIATICA			52	1			87	100					2012-06-11	2011	Artisanal fisheries in Croatia and throughout the Mediterranean coastal region have a long tradition. In recent times the booming growth of human populations along Mediterranean coasts has led to harvesting of its marine resources in almost insupportable quantities, thus placing the research of this topic in a complex context. At the same time, fisheries management throughout the Mediterranean re…						1	0	1	1	2012-01-13		WOS:000295961000008
J	Hamilton, R. J.; Potuku, T.; Montambault, J. R.							Community-based conservation results in the recovery of reef fish spawning aggregations in the Coral Triangle						BIOLOGICAL CONSERVATION			144	6			1850	1858		10.1016/j.biocon.2011.03.024			2012-06-11	2011	In the Coral Triangle community-based marine protected areas (MPAs) are being established at a prolific rate. Their establishment can benefit both fisheries and biodiversity, and they provide both a socially and economically acceptable means of managing coral reefs in developing nations. However, because such MPAs are typically small (usually <0.5 km(2)), they will rarely provide protection to la…						3	0	3	3	2012-06-07		WOS:000292661100009
J	Hansen, Gretchen J. A.; Ban, Natalie C.; Jones, Michael L.; Kaufman, Les; Panes, Hazel M.; Yasue, Mai; Vincent, Amanda C. J.				Ban, Natalie/C-6938-2009			Hindsight in marine protected area selection: A comparison of ecological representation arising from opportunistic and systematic approaches						BIOLOGICAL CONSERVATION			144	6			1866	1875		10.1016/j.biocon.2011.04.002			2012-06-11	2011	Systematic approaches to site selection for marine protected areas (MPAs) are often favored over opportunistic approaches as a means to meet conservation objectives efficiently. In this study, we compared analytically the conservation value of these two approaches. We locate this study in Danajon Bank, central Philippines, where many MPAs were established opportunistically based on community pref…						5	0	3	5	2012-06-07		WOS:000292661100011
J	Danylchuk, Andy J.; Cooke, Steven J.				Cooke, Steven/F-4193-2010			Engaging the Recreational Angling Community to Implement and Manage Aquatic Protected Areas						CONSERVATION BIOLOGY			25	3			458	464		10.1111/j.1523-1739.2010.01631.x			2012-06-11	2011	Recreational angling is a popular leisure activity, the quality of which is greatly dependent on fish abundance and well-functioning aquatic ecosystems. Aquatic protected areas (APAs) are used to help maintain and even restore aquatic systems and their associated biota, including fish species that are popular with recreational anglers. Paradoxically, the use of APAs has been a source of much cont…						0	0	0	0	0888-8892		WOS:000290491700008
J	Scholz, Astrid J.; Steinback, Charles; Kruse, Sarah A.; Mertens, Mike; Silverman, Howard							Incorporation of Spatial and Economic Analyses of Human-Use Data in the Design of Marine Protected Areas						CONSERVATION BIOLOGY			25	3			485	492		10.1111/j.1523-1739.2010.01626.x			2012-06-11	2011	Social, economic, and ecological criteria contribute to the successful design, implementation, and management of marine protected areas (MPAs). In the context of California's Marine Life Protection Act Initiative, we developed a set of methods for collecting, compiling, and analyzing data about the spatial extent and relative economic importance of commercial and recreational fishing. We intervie…						0	0	0	0	0888-8892		WOS:000290491700011
J	Mockrin, Miranda H.; Rockwell, Robert F.; Redford, Kent H.; Keuler, Nicholas S.							Effects of Landscape Features on the Distribution and Sustainability of Ungulate Hunting in Northern Congo						CONSERVATION BIOLOGY			25	3			514	525		10.1111/j.1523-1739.2011.01660.x			2012-06-11	2011	Understanding the spatial dimensions of hunting and prey population dynamics is important in order to estimate the sustainability of hunting in tropical forests. We investigated how hunting offtake of vertebrates differed in mixed forest and monodominant forest (composed of Gilbertiodendron dewevrei) and over different spatial extents within the hunting catchment around the logging town of Kabo, …						1	0	0	1	0888-8892		WOS:000290491700014
J	Goetze, J. S.; Langlois, T. J.; Egli, D. P.; Harvey, E. S.				Harvey, Euan/B-2896-2011; Langlois, Timothy/D-9777-2011			Evidence of artisanal fishing impacts and depth refuge in assemblages of Fijian reef fish						CORAL REEFS			30	2			507	517		10.1007/s00338-011-0732-8			2012-06-11	2011	Protection from fishing generally results in an increase in the abundance and biomass of species targeted by fisheries within marine reserve boundaries. Natural refuges such as depth may also protect such species, yet few studies in the Indo Pacific have investigated the effects of depth concomitant with marine reserves. We studied the effects of artisanal fishing and depth on reef fish assemblag…						4	0	4	4	0722-4028		WOS:000290327000028
J	McGilliard, Carey R.; Punt, Andre E.; Hilborn, Ray							Spatial structure induced by marine reserves shapes population responses to catastrophes in mathematical models						ECOLOGICAL APPLICATIONS			21	4			1399	1409		10.1890/10-0001.1			2012-06-11	2011	Catastrophic events such as oil spills, hypoxia, disease, and major predation events occur in marine ecosystems and affect fish populations. Previous evaluations of the performance of spatial management alternatives have not considered catastrophic events. We investigate the effects of local and global catastrophic events on populations managed with and without no-take marine reserves and with fi…						0	0	0	0	1051-0761		WOS:000291535500032
J	Christie, Patrick							Creating space for interdisciplinary marine and coastal research: five dilemmas and suggested resolutions						ENVIRONMENTAL CONSERVATION			38	2	SI		172	186		10.1017/S0376892911000129			2012-06-11	2011	Important changes are needed to disciplinary theories and methods to support interdisciplinary and integrated ocean and coastal management policies and implementation. This review argues that theories and methods should conform to a perspective that ocean management is a societal activity with diverse goals ideally informed by interdisciplinary information. The review focuses on the integrated co…						4	0	1	4	0376-8929		WOS:000291114200006
J	George, Grinson; Vethamony, Ponnumony; Sudheesh, Kotteppad; Babu, Madavana Thomas							Fish larval transport in a macro-tidal regime: Gulf of Kachchh, west coast of India						FISHERIES RESEARCH			110	1			160	169		10.1016/j.fishres.2011.04.002			2012-06-11	2011	This study combines observational data with a two-dimensional numerical model results to determine the fate of fish eggs released in the Gulf of Kachchh (GoK), a semi enclosed basin on the west coast of India. Fish eggs were treated as passive particles in the model, and were released from probable spawning sites identified from the field surveys. Areas with retention of larvae above 30% have bee…						1	0	0	1	0165-7836		WOS:000291838800018
J	McClanahan, Tim R.; Maina, Joseph M.; Muthiga, Nyawira A.							Associations between climate stress and coral reef diversity in the western Indian Ocean						GLOBAL CHANGE BIOLOGY			17	6			2023	2032		10.1111/j.1365-2486.2011.02395.x			2012-06-11	2011	Climatic-oceanographic stress and coral reef diversity were mapped in the western Indian Ocean (WIO) in order to determine if there were associations between high diversity coral reefs and regions with low-to-moderate climate stress. A multivariate stress model developed to estimate environmental exposure to stress, an empirical index of the coral community's susceptibility to stress, and field d…						4	0	3	4	1354-1013		WOS:000289641400002
J	Edwards, Helen J.; Elliott, Ian A.; Eakin, C. Mark; Irikawa, Akiyuki; Madin, Joshua S.; McField, Melanie; Morgan, Jessica A.; van Woesik, Robert; Mumby, Peter J.				Elliott, Ian/C-5300-2009; Edwards, Helen/D-1633-2009; Eakin, C. Mark/F-5585-2010; Mumby, Peter/F-9914-2010			How much time can herbivore protection buy for coral reefs under realistic regimes of hurricanes and coral bleaching?						GLOBAL CHANGE BIOLOGY			17	6			2033	2048		10.1111/j.1365-2486.2010.02366.x			2012-06-11	2011	Coral reefs have been more severely impacted by recent climate instability than any other ecosystem on Earth. Corals tolerate a narrow range of physical environmental stress, and increases in sea temperature of just 1 degrees C over several weeks can result in mass coral mortality, often exceeding 95% of individuals over hundreds of square kilometres. Even conservative climate models predict that…						1	0	1	1	1354-1013		WOS:000289641400003
J	Vincent, A. C. J.; Foster, S. J.; Koldewey, H. J.							Conservation and management of seahorses and other Syngnathidae						JOURNAL OF FISH BIOLOGY			78	6	SI		1681	1724		10.1111/j.1095-8649.2011.03003.x			2012-06-11	2011	This article analyses the pressures on seahorses and explores conservation responses. It focuses on seahorses (Hippocampus spp.) but also considers pipefishes and seadragons, especially where they can fill gaps in seahorse knowledge. The charisma of many syngnathids can make them good flagship species for threats and solutions in marine conservation. The article combines a synthesis of published …						5	0	6	6	0022-1112		WOS:000292333700006
J	Woodall, L. C.; Koldewey, H. J.; Shaw, P. W.							Historical and contemporary population genetic connectivity of the European short-snouted seahorse Hippocampus hippocampus and implications for management						JOURNAL OF FISH BIOLOGY			78	6	SI		1738	1756		10.1111/j.1095-8649.2011.02974.x			2012-06-11	2011	This first genetic study of Hippocampus hippocampus covers the species' entire geographic range and employs two mtDNA markers (control region and cytochrome b) to establish patterns of population structuring. A total of 255 specimens from 21 locations were used to obtain 89 concatenated haplotypes. The common haplotype was present in all but one population, however, most haplotypes were unique. T…						1	0	1	1	0022-1112		WOS:000292333700008
J	Martins, Gustavo M.; Jenkins, Stuart R.; Hawkins, Stephen J.; Neto, Ana I.; Medeiros, Andre R.; Thompson, Richard C.				Martins, Gustavo/A-8857-2008; Jenkins, Stuart/D-2032-2010; Neto, Ana/C-1505-2010			Illegal harvesting affects the success of fishing closure areas						JOURNAL OF THE MARINE BIOLOGICAL ASSOCIATION OF THE UNITED KINGDOM			91	4			929	937		10.1017/S0025315410001189			2012-06-11	2011	There is clear evidence that marine reserves can be used as effective tools to foster the recovery of disturbed ecosystems. In the Azores, intense exploitation of the patellid limpets Patella candei and P. aspera has led to a rapid decline in their populations and subsequent collapse of the fishery in 1985. In 1993, legislation was passed to protect limpets, including the establishment of limpet …						1	0	0	1	0025-3154		WOS:000290213000021
J	Copello, Sofia; Dogliotti, Ana I.; Gagliardini, Domingo A.; Quintana, Flavio							Oceanographic and biological landscapes used by the Southern Giant Petrel during the breeding season at the Patagonian Shelf						MARINE BIOLOGY			158	6			1247	1257		10.1007/s00227-011-1645-3			2012-06-11	2011	The study of how and why marine animals distribute themselves at sea has important conservation and management implications of the species and their habitats. We characterize the oceanographic and biological landscapes of the marine areas used by breeding Southern Giant Petrels (Macronectes giganteus) at Patagonian colonies and explore inter-sexual and inter-colony differences. The at-sea movemen…						1	0	1	1	0025-3162		WOS:000290806500007
J	Pittman, Simon J.; Brown, Kerry A.							Multi-Scale Approach for Predicting Fish Species Distributions across Coral Reef Seascapes						PLOS ONE			6	5					e20583	10.1371/journal.pone.0020583			MAY 26 2011	2011	Two of the major limitations to effective management of coral reef ecosystems are a lack of information on the spatial distribution of marine species and a paucity of data on the interacting environmental variables that drive distributional patterns. Advances in marine remote sensing, together with the novel integration of landscape ecology and advanced niche modelling techniques provide an unpre…						7	0	6	7	1932-6203		WOS:000291052200079
J	Lopez-Sanz, Angel; Stelzenmueller, Vanessa; Maynou, Francesc; Sabates, Ana				Maynou, Francesc/A-6433-2011			The influence of environmental characteristics on fish larvae spatial patterns related to a marine protected area: The Medes islands (NW Mediterranean)						ESTUARINE COASTAL AND SHELF SCIENCE			92	4			521	533		10.1016/j.ecss.2011.02.006			MAY 20 2011	2011	We assessed the linkages between environmental variables and the spatio-temporal distribution patterns of larval abundance of coastal fish assemblages within and outside the Medes Islands marine protected area (MPA; NW Mediterranean) to explore possible fisheries effects such as larvae export of the latter. We analyzed small-scale fish larvae distribution of 28 representative taxa from the rocky …						2	0	1	2	0272-7714		WOS:000291184300001
J	Faye, Djibril; de Morais, Luis Tito; Raffray, Jean; Sadio, Oumar; Thiaw, Omar Thiom; Le Loc'h, Francois				Le Loc'h, Francois/A-5038-2008; Tito de Morais, Luis/B-1721-2012; Bosley, Sharron/E-4641-2012			Structure and seasonal variability of fish food webs in an estuarine tropical marine protected area (Senegal): Evidence from stable isotope analysis						ESTUARINE COASTAL AND SHELF SCIENCE			92	4			607	617		10.1016/j.ecss.2011.02.017			MAY 20 2011	2011	West African tropical estuaries play an important role in the growth and survival of many commercially exploited fish species and enable the sustainability of considerable artisanal fishery yields. However, their trophic functioning remains poorly understood. In the Sine Saloum estuary (Senegal), a marine protected area (MPAs) was designated in 2003 to manage fisheries resources. The present stud…						2	0	2	2	0272-7714		WOS:000291184300010
J	Gruess, Arnaud; Kaplan, David M.; Hart, Deborah R.				Kaplan, David/G-5230-2010			Relative Impacts of Adult Movement, Larval Dispersal and Harvester Movement on the Effectiveness of Reserve Networks						PLOS ONE			6	5					e19960	10.1371/journal.pone.0019960			MAY 17 2011	2011	Movement of individuals is a critical factor determining the effectiveness of reserve networks. Marine reserves have historically been used for the management of species that are sedentary as adults, and, therefore, larval dispersal has been a major focus of marine-reserve research. The push to use marine reserves for managing pelagic and demersal species poses significant questions regarding the…						0	0	0	0	1932-6203		WOS:000290657500037
J	Tyler, Elizabeth H. M.; Manica, Andrea; Jiddawi, Narriman; Speight, Martin R.				Manica, Andrea/B-5497-2008			A role for partially protected areas on coral reefs: maintaining fish diversity?						AQUATIC CONSERVATION-MARINE AND FRESHWATER ECOSYSTEMS			21	3			231	238		10.1002/aqc.1182			2012-05-11	2011	1. Completely banning fishing from coral reefs is now accepted to have significant benefits for marine biodiversity and in many cases, fisheries. However, the benefits of regulating fishing on coral reefs, by restricting the methods used, or the total amount of fishing, are less well understood, even though such regulations are much more likely to be supported by fishermen.2. This study assesses …						1	0	0	1	1052-7613		WOS:000290858200003
J	Bearzi, G.; Bonizzoni, S.; Gonzalvo, J.							Dolphins and coastal fisheries within a marine protected area: mismatch between dolphin occurrence and reported depredation						AQUATIC CONSERVATION-MARINE AND FRESHWATER ECOSYSTEMS			21	3			261	267		10.1002/aqc.1179			2012-05-11	2011	1. Dolphins are often blamed for reducing fisheries catches and may be killed in retaliation. Depredation of fishing gear in coastal Mediterranean waters is normally caused by bottlenose dolphins. Economic impact, however, may be modest even within areas of reportedly acute conflict.2. Boat surveys and interviews were conducted to investigate dolphin occurrence and interactions with fisheries wit…						0	0	0	0	1052-7613		WOS:000290858200006
J	Halpern, Benjamin S.; White, Crow; Lester, Sarah E.; Costello, Christopher; Gaines, Steven D.							Using portfolio theory to assess tradeoffs between return from natural capital and social equity across space						BIOLOGICAL CONSERVATION			144	5			1499	1507		10.1016/j.biocon.2011.01.019			2012-05-11	2011	Spatial variance in returns from natural resources, driven by resource dynamics and regulations, can have strong consequences for equitable delivery of value to individuals and communities. Yet resource management models implicitly weight returns equally across space, even when space is explicitly included in model dynamics and policy. Here we translate financial portfolio theory from the tempora…						0	0	0	0	2012-06-07		WOS:000292668200031
J	Trebilco, Rowan; Halpern, Benjamin S.; Flemming, Joanna Mills; Field, Chris; Blanchard, Wade; Worm, Boris							Mapping species richness and human impact drivers to inform global pelagic conservation prioritisation						BIOLOGICAL CONSERVATION			144	5			1758	1766		10.1016/j.biocon.2011.02.024			2012-05-11	2011	Given the widely recognized need to better protect the oceans but limited resources to do so, methods for prioritizing potential protected area sites are important. This is particularly true for the open oceans, where few protected areas currently exist and data availability is limited. Here, we examine the relationship between the distributions of tuna and billfish species richness (an indicator…						2	0	2	2	2012-06-07		WOS:000292668200061
J	Parsons, D. M.							A fisheries perspective of behavioural variability: differences in movement behaviour and extraction rate of an exploited sparid, snapper (Pagrus auratus) (vol 68, pg 632, 2011)						CANADIAN JOURNAL OF FISHERIES AND AQUATIC SCIENCES			68	5			953	953		10.1139/F2011-005			2012-05-11	2011							3	0	3	3	0706-652X		WOS:000291445900023
J	Dikou, Angela; Dionysopoulou, Niki							Communicating a Marine Protected Area Through the Local Press: The Case of the National Marine Park of Alonissos, Northern Sporades, Greece						ENVIRONMENTAL MANAGEMENT			47	5			777	788		10.1007/s00267-011-9649-9			2012-05-11	2011	Local distrust for Marine Protected Area (MPA) managers is emerging as an important factor obstructing the fulfillment of MPA objectives, and, thus, there is a need to develop a means of enhancing relationship building between MPA managers and local people. We used the National Marine Park of Alonissos, Northern Sporades (NMPANS), Greece, as a relevant case-study to investigate whether the local …						0	0	0	0	0364-152X		WOS:000290277200007
J	Olsen, Esben Moland; Moland, Even				Olsen, Esben/B-1894-2012			Fitness landscape of Atlantic cod shaped by harvest selection and natural selection						EVOLUTIONARY ECOLOGY			25	3	SI		695	710		10.1007/s10682-010-9427-9			2012-05-11	2011	Harvesting may lead to evolutionary changes in life histories on a contemporary time scale, changes that could be maladaptive in natural contexts. However, our understanding of the strength and direction of harvest-induced selection versus natural selection is still limited, partly due to the difficulty of tracking the fate of individuals in the wild. Here, we present direct estimates of harvest …						3	0	3	3	0269-7653		WOS:000289257900010
J	Coulthard, Sarah; Johnson, Derek; McGregor, J. Allister							Poverty, sustainability and human wellbeing: A social wellbeing approach to the global fisheries crisis						GLOBAL ENVIRONMENTAL CHANGE-HUMAN AND POLICY DIMENSIONS			21	2	SI		453	463		10.1016/j.gloenvcha.2011.01.003			2012-05-11	2011	The purpose of this paper is to explore the extent to which a social wellbeing approach can offer a useful way of addressing the policy challenge of reconciling poverty and environmental objectives for development policy makers. In order to provide detail from engagement with a specific policy challenge it takes as its illustrative example the global fisheries crisis. This crisis portends not onl…						7	1	2	8	0959-3780		WOS:000292177500018
J	Stevenson, Todd C.; Tissot, Brian N.; Dierking, Jan							Fisher behaviour influences catch productivity and selectivity in West Hawaii's aquarium fishery						ICES JOURNAL OF MARINE SCIENCE			68	5			813	822		10.1093/icesjms/fsr020			2012-05-11	2011	In 1999, marine protected areas (MPAs) were implemented along the west coast of the Big Island of Hawaii, closing similar to 35% of the coastline to aquarium fishing. Catch per unit effort and total catch of the most commonly targeted fish, yellow tang (Zebrasoma flavescens), have increased since the implementation of the MPAs, yet its abundance has declined by 45% in areas open to aquarium fishi…						2	0	2	2	1054-3139		WOS:000289582900002
J	Robb, Carolyn K.; Bodtker, Karin M.; Wright, Kim; Lash, Jennifer							Commercial fisheries closures in marine protected areas on Canada's Pacific coast: The exception, not the rule						MARINE POLICY			35	3			309	316		10.1016/j.marpol.2010.10.010			2012-05-11	2011	No-take marine protected areas (MPAs), where all fishing is prohibited, have been shown to provide benefits that include greater productivity of fish stocks due to increased densities, average sizes, and reproductive output. A critical component of this success is the effective management of MPAs to ensure that only those activities deemed permissible, are allowed to occur. As of 2008, 161 MPAs h…						3	0	1	3	0308-597X		CCC:000287276400004
J	Davies, Andrew J.; Guinotte, John M.				Davies, Andrew/A-4222-2008			Global Habitat Suitability for Framework-Forming Cold-Water Corals						PLOS ONE			6	4					e18483	10.1371/journal.pone.0018483			APR 15 2011	2011	Predictive habitat models are increasingly being used by conservationists, researchers and governmental bodies to identify vulnerable ecosystems and species' distributions in areas that have not been sampled. However, in the deep sea, several limitations have restricted the widespread utilisation of this approach. These range from issues with the accuracy of species presences, the lack of reliabl…						12	0	10	12	1932-6203		WOS:000289578600010
J	Golbuu, Yimnang; Friedlander, Alan M.							Spatial and temporal characteristics of grouper spawning aggregations in marine protected areas in Palau, western Micronesia						ESTUARINE COASTAL AND SHELF SCIENCE			92	2			223	231		10.1016/j.ecss.2010.12.034			APR 10 2011	2011	In Palau, Ngerumekaol and Ebiil Channels are spawning aggregation sites that have been protected from fishing since 1976 and 2000, respectively. Groupers and other targeted fisheries species were monitored monthly over a 1.5 year period at these two spawning aggregations and two nearby exploited reference sites where grouper formerly aggregated to spawn. At the protected aggregation sites, three …						0	0	0	0	0272-7714		WOS:000289324500003
J	Heck, Nadine; Dearden, Philip; McDonald, Adrian; Carver, Steve							Developing MPA performance indicators with local stakeholders' input in the Pacific Rim National Park Reserve, Canada						BIODIVERSITY AND CONSERVATION			20	4			895	911		10.1007/s10531-011-0002-7			2012-04-11	2011	Along with an increase in the establishment of marine protected areas (MPAs), the need arises to assess if designated MPAs are achieving their goals and objectives. A first step in this process is the identification of MPA performance indicators against which to evaluate MPA management. This study investigates the development of MPA performance indicators using an in situ approach by including di…						1	0	0	1	0960-3115		WOS:000288556000013
J	Salomon, Anne K.; Gaichas, Sarah K.; Jensen, Olaf P.; Agostini, Vera N.; Sloan, N. A.; Rice, Jake; McClanahan, Tim R.; Ruckelshaus, Mary H.; Levin, Phil S.; Dulvy, Nicholas K.; Babcock, Elizabeth A.				Jensen, Olaf/E-4947-2011; Dulvy, Nicholas/I-2895-2012			BRIDGING THE DIVIDE BETWEEN FISHERIES AND MARINE CONSERVATION SCIENCE						BULLETIN OF MARINE SCIENCE			87	2			251	274		10.5343/bms.2010.1089			2012-04-11	2011	Researchers from traditionally disparate disciplines and practitioners with typically incongruent mandates have begun working together to better understand and solve marine conservation and sustainable yield problems. Conservation practitioners are recognizing the need to achieve conservation goals in seascapes that are a source of livelihood and food security, while fisheries management is reali…						4	0	2	4	1977-07-01		WOS:000290055400008
J	Little, L. R.; Grafton, R. Q.; Kompas, T.; Smith, A. D. M.; Punt, A. E.; Mapstone, B. D.				Little, Rich/E-7578-2011; Smith, Tony/A-4017-2012			Complementarity of No-Take Marine Reserves and Individual Transferable Catch Quotas for Managing the Line Fishery of the Great Barrier Reef						CONSERVATION BIOLOGY			25	2			333	340		10.1111/j.1523-1739.2010.01590.x			2012-04-11	2011	Changes in the management of the fin fish fishery of the Great Barrier Reef motivated us to investigate the combined effects on economic returns and fish biomass of no-take areas and regulated total allowable catch allocated in the form of individual transferable quotas (such quotas apportion the total allowable catch as fishing rights and permits the buying and selling of these rights among fish…						2	0	2	2	0888-8892		WOS:000288460000017
J	Feary, David A.; Cinner, Joshua E.; Graham, Nicholas A. J.; Januchowski-Hartley, Fraser A.				Cinner, Joshua/E-8966-2011			Effects of Customary Marine Closures on Fish Behavior, Spear-Fishing Success, and Underwater Visual Surveys						CONSERVATION BIOLOGY			25	2			341	349		10.1111/j.1523-1739.2010.01613.x			2012-04-11	2011	Customary management systems (i.e., management systems that limit the use of marine resources), such as rotational fisheries closures, can limit harvest of resources. Nevertheless, the explicit goals of customary management are often to influence fish behavior (in particular flight distance, i.e., distance at which an organism begins to flee an approaching threat), rather than fish abundance. We …						6	0	4	6	0888-8892		WOS:000288460000018
J	Yesson, Chris; Clark, Malcolm R.; Taylor, Michelle L.; Rogers, Alex D.							The global distribution of seamounts based on 30 arc seconds bathymetry data						DEEP-SEA RESEARCH PART I-OCEANOGRAPHIC RESEARCH PAPERS			58	4			442	453		10.1016/j.dsr.2011.02.004			2012-04-11	2011	Seamounts and knolls are 'undersea mountains', the former rising more than 1000 m from the seafloor. These features provide important habitats for aquatic predators, demersal deep-sea fish and benthic invertebrates. However most seamounts have not been surveyed and their numbers and locations are not well known. Previous efforts to locate and quantify seamounts have used relatively coarse bathyme…						8	0	8	8	0967-0637		WOS:000289391000010
J	Graham, Nicholas A. J.; Chabanet, Pascale; Evans, Richard D.; Jennings, Simon; Letourneur, Yves; MacNeil, M. Aaron; McClanahan, Tim R.; Ohman, Marcus C.; Polunin, Nicholas V. C.; Wilson, Shaun K.				MacNeil, M Aaron/F-4680-2010; LETOURNEUR, Yves/B-4387-2012; Jennings, Simon/F-5085-2012			Extinction vulnerability of coral reef fishes						ECOLOGY LETTERS			14	4			341	348		10.1111/j.1461-0248.2011.01592.x			2012-04-11	2011	P>With rapidly increasing rates of contemporary extinction, predicting extinction vulnerability and identifying how multiple stressors drive non-random species loss have become key challenges in ecology. These assessments are crucial for avoiding the loss of key functional groups that sustain ecosystem processes and services. We developed a novel predictive framework of species extinction vulnera…						13	0	13	13	1461-023X		WOS:000288211000003
J	Nanola, Cleto L., Jr.; Alino, Porfirio M.; Carpenter, Kent E.							Exploitation-related reef fish species richness depletion in the epicenter of marine biodiversity						ENVIRONMENTAL BIOLOGY OF FISHES			90	4			405	420		10.1007/s10641-010-9750-6			2012-04-11	2011	The central Visayan region of the Philippines historically has the highest concentration of coral reef fishes than any other large marine area in the world. This well-supported biogeographic phenomenon is contradicted by recent transect observations on coral reefs that indicates that the Visayan region and the southern Philippine Sea region have the lowest species richness in the Philippines. The…						1	0	1	1	0378-1909		WOS:000288512600007
J	Thorpe, Andy; Bavinck, Maarten; Coulthard, Sarah							Tracking the Debate Around Marine Protected Areas: Key Issues and the BEG Framework						ENVIRONMENTAL MANAGEMENT			47	4			546	563		10.1007/s00267-011-9632-5			2012-04-11	2011	Marine conservation is often criticized for a mono-disciplinary approach, which delivers fragmented solutions to complex problems with differing interpretations of success. As a means of reflecting on the breadth and range of scientific research on the management of the marine environment, this paper develops an analytical framework to gauge the foci of policy documents and published scientific w…						4	0	2	4	0364-152X		WOS:000289366400004
J	Ferraro, Gianluca; Brans, Marleen; Deme, Moustapha; Failler, Pierre							The Establishment of Marine Protected Areas in Senegal: Untangling the Interactions Between International Institutions and National Actors						ENVIRONMENTAL MANAGEMENT			47	4			564	572		10.1007/s00267-010-9612-1			2012-04-11	2011	International institutions, understood as sets of rules contained in international agreements, are aimed at orienting national governments towards specific policy options. Nevertheless, they can determine a change in national policies and practices only if states are willing and capable of incorporating international obligations into their national legislations and ensuring their application and …						0	0	0	0	0364-152X		WOS:000289366400005
J	Sowman, Merle; Hauck, Maria; van Sittert, Lance; Sunde, Jackie							Marine Protected Area Management in South Africa: New Policies, Old Paradigms						ENVIRONMENTAL MANAGEMENT			47	4			573	583		10.1007/s00267-010-9499-x			2012-04-11	2011	A historical perspective on MPA identification and governance in South Africa reflects the continued influence of a top-down and natural science-based paradigm, that has hardly changed over the past half century, despite the wealth of literature, and a growing consensus, that advocates the need to adopt a more integrated and human-centered approach. Based on extensive research in two coastal fish…						3	0	3	3	0364-152X		WOS:000289366400006
J	Pollnac, Richard; Seara, Tarsila							Factors Influencing Success of Marine Protected Areas in the Visayas, Philippines as Related to Increasing Protected Area Coverage						ENVIRONMENTAL MANAGEMENT			47	4			584	592		10.1007/s00267-010-9540-0			2012-04-11	2011	Throughout the world there is a general consensus among environmentalists that there should be an increase in the amount of marine area that should be reserved in marine protected areas (MPAs). In fact, the 1998 Philippines Fishery Code indicates a need for designation of at least 15% of municipal waters for fish refuges or sanctuaries. Such an increase in area would take productive fishing areas…						3	0	1	3	0364-152X		WOS:000289366400007
J	Heck, Nadine; Dearden, Philip; McDonald, Adrian; Carver, Steve							Stakeholder Opinions on the Assessment of MPA Effectiveness and Their Interests to Participate at Pacific Rim National Park Reserve, Canada						ENVIRONMENTAL MANAGEMENT			47	4			603	616		10.1007/s00267-010-9609-9			2012-04-11	2011	As the number of marine protected areas (MPAs) is globally increasing, information is needed on the effectiveness of existing sites. Many protected area agencies however have limited resources and are unable to evaluate MPA effectiveness. An evaluation conducted entirely by the managing agency may also lack credibility. Long-term monitoring and evaluation programs should ideally offer opportuniti…						1	0	1	1	0364-152X		WOS:000289366400009
J	Gonzalez, Clarence; Jentoft, Svein							MPA in Labor: Securing the Pearl Cays of Nicaragua						ENVIRONMENTAL MANAGEMENT			47	4			617	629		10.1007/s00267-010-9587-y			2012-04-11	2011	Implementation of Marine Protected Areas (MPAs) has always a step-zero, i.e., an initial phase when the idea is incepted, communicated and negotiated among stakeholders. What happens during this phase is likely to have an impact later on. If not done right, the management of the MPA may encounter problems at later stage that will be difficult to correct. Inspired by this working theory, this arti…						2	0	2	2	0364-152X		WOS:000289366400010
J	Gerhardinger, Leopoldo C.; Godoy, Eduardo A. S.; Jones, Peter J. S.; Sales, Gilberto; Ferreira, Beatrice P.				Jones, Peter/C-3322-2008			Marine Protected Dramas: The Flaws of the Brazilian National System of Marine Protected Areas						ENVIRONMENTAL MANAGEMENT			47	4			630	643		10.1007/s00267-010-9554-7			2012-04-11	2011	This article discusses the current problems and issues associated with the implementation of a National System of Marine Protected Areas in Brazil. MPA managers and higher governmental level authorities were interviewed about their perceptions of the implementation of a national MPA strategy and the recent changes in the institutional arrangement of government marine conservation agencies. Interv…						1	0	0	1	0364-152X		WOS:000289366400011
J	Mackelworth, Peter; Holcer, Drasko; Jovanovic, Jelena; Fortuna, Caterina							Marine Conservation and Accession: The Future for the Croatian Adriatic						ENVIRONMENTAL MANAGEMENT			47	4			644	655		10.1007/s00267-010-9460-z			2012-04-11	2011	The European Union (EU) is the world's largest trading bloc and the most influential supra-national organisation in the region. The EU has been the goal for many eastern European States, for Croatia accession remains a priority and underpins many of its national policies. However, entry into the EU requires certain commitments and concessions. In October 2003 the Croatian parliament declared an e…						2	0	2	2	0364-152X		WOS:000289366400012
J	van Haastrecht, Eline K.; Toonen, Hilde M.							Science-Policy Interactions in MPA Site Selection in the Dutch Part of the North Sea						ENVIRONMENTAL MANAGEMENT			47	4			656	670		10.1007/s00267-010-9546-7			2012-04-11	2011	At the 7th conference of the parties to the Convention on Biological Diversity (CBD-COP7, Kuala Lumpur, 2004) it was agreed to establish a global network of marine and coastal protected areas by 2012. The defined objectives of this MPA-network are based on the ecosystem approach: to protect biodiversity and other ecological values, and to ensure sustainable use. The (inter)national policy guideli…						0	0	0	0	0364-152X		WOS:000289366400013
J	Nursey-Bray, Melissa							Social Contexts and Customary Fisheries: Marine Protected Areas and Indigenous Use, Australia						ENVIRONMENTAL MANAGEMENT			47	4			671	683		10.1007/s00267-010-9545-8			2012-04-11	2011	Worldwide, the implementation of marine protected areas (MPAs) offers opportunities for delivering fisheries and biodiversity management objectives. In Australia however, the primary function of an MPA is that of biodiversity conservation. Nonetheless, the management of Indigenous customary fisheries is one area where fisheries and biodiversity issues converge. This article examines the relations…						0	0	0	0	0364-152X		WOS:000289366400014
J	Hargreaves-Allen, Venetia; Mourato, Susana; Milner-Gulland, Eleanor Jane							A Global Evaluation of Coral Reef Management Performance: Are MPAs Producing Conservation and Socio-Economic Improvements?						ENVIRONMENTAL MANAGEMENT			47	4			684	700		10.1007/s00267-011-9616-5			2012-04-11	2011	There is a consensus that Marine Protected Area (MPA) performance needs regular evaluation against clear criteria, incorporating counterfactual comparisons of ecological and socio-economic performance. However, these evaluations are scarce at the global level. We compiled self-reports from managers and researchers of 78 coral reef-based MPAs world-wide, on the conservation and welfare improvement…						3	0	2	3	0364-152X		WOS:000289366400015
J	Smith, Steven G.; Ault, Jerald S.; Bohnsack, James A.; Harper, Douglas E.; Luo, Jiangang; McClellan, David B.							Multispecies survey design for assessing reef-fish stocks, spatially explicit management performance, and ecosystem condition						FISHERIES RESEARCH			109	1			25	41		10.1016/j.fishres.2011.01.012			2012-04-11	2011	Principles of statistical sampling design were used to guide refinement of a 30-year multispecies fishery-independent diver visual survey of population abundance and size structure of more than 250 exploited and non-target fishes in the Florida coral reef ecosystem. Reef habitat features and no-take marine reserves (NTMRs) were used to partition the 885 km(2) sampling domain into sub-areas (or st…						3	0	3	3	0165-7836		WOS:000289400300004
J	Berezansky, L.; Idels, L.; Kipnis, M.							Mathematical model of marine protected areas						IMA JOURNAL OF APPLIED MATHEMATICS			76	2			312	325		10.1093/imamat/hxq043			2012-04-11	2011	We consider two regions with a fish population that is dispersing between the two areas, and fishing takes place only in region 2, with region 1 established as no-fishing zone. Marine protected areas (MPAs) have been promoted as conservation and fishery management tools, and at present, there are over 1300 MPAs in the world. A new mathematical model of an MPA that reflects the complexity of the n…						1	0	0	1	0272-4960		WOS:000288802800006
J	Gerrodette, Tim; Rojas-Bracho, Lorenzo							Estimating the success of protected areas for the vaquita, Phocoena sinus						MARINE MAMMAL SCIENCE			27	2			E101	E125		10.1111/j.1748-7692.2010.00449.x			2012-04-11	2011	P>Bycatch in artisanal gill nets threatens the vaquita, Phocoena sinus, with extinction. In 2008 the Mexican government announced a conservation action plan for this porpoise, with three options for a protected area closed to gill net fishing. The probability of success of each of the three options was estimated with a Bayesian population model, where success was defined as an increase in vaquita…						5	0	2	5	0824-0469		WOS:000289465900007
J	Silvert, William; Moustakas, Aristides							The impacts over time of marine protected areas: A null model						OCEAN & COASTAL MANAGEMENT			54	4			312	317		10.1016/j.ocecoaman.2010.12.011			2012-04-11	2011	A dynamic one-dimensional model of Marine Protected Areas (MPAs) along a coastline has been developed to investigate their impact on fish stocks and landings over time. The model is basically a cellular automaton implemented with a spreadsheet and is used to trace stocks and landings from the initiation of the MPA for several years under a set of three different scenarios for the allocation of fi…						1	0	1	1	0964-5691		WOS:000288578400004
J	Mora, Camilo; Aburto-Oropeza, Octavio; Ayala Bocos, Arturo; Ayotte, Paula M.; Banks, Stuart; Bauman, Andrew G.; Beger, Maria; Bessudo, Sandra; Booth, David J.; Brokovich, Eran; Brooks, Andrew; Chabanet, Pascale; Cinner, Joshua E.; Cortes, Jorge; Cruz-Motta, Juan J.; Cupul Magana, Amilcar; DeMartini, Edward E.; Edgar, Graham J.; Feary, David A.; Ferse, Sebastian C. A.; Friedlander, Alan M.; Gaston…				Cinner, Joshua/E-8966-2011; LETOURNEUR, Yves/B-4387-2012			Global Human Footprint on the Linkage between Biodiversity and Ecosystem Functioning in Reef Fishes						PLOS BIOLOGY			9	4					e1000606	10.1371/journal.pbio.1000606			2012-04-11	2011	Difficulties in scaling up theoretical and experimental results have raised controversy over the consequences of biodiversity loss for the functioning of natural ecosystems. Using a global survey of reef fish assemblages, we show that in contrast to previous theoretical and experimental studies, ecosystem functioning (as measured by standing biomass) scales in a non-saturating manner with biodive…						14	0	11	14	1544-9173		WOS:000289938900001
J	Grech, Alana; Sheppard, James; Marsh, Helene				Grech, Alana/E-9464-2011			Informing Species Conservation at Multiple Scales Using Data Collected for Marine Mammal Stock Assessments						PLOS ONE			6	3					e17993	10.1371/journal.pone.0017993			MAR 28 2011	2011	Background: Conservation planning and the design of marine protected areas (MPAs) requires spatially explicit information on the distribution of ecological features. Most species of marine mammals range over large areas and across multiple planning regions. The spatial distributions of marine mammals are difficult to predict using habitat modelling at ecological scales because of insufficient und…						1	0	1	1	1932-6203		WOS:000289053800010
J	Loury, Erin							Fishing with a Mission: Collaborating to Monitor California's Marine Protected Areas						FISHERIES			36	3			141	142	PII 935792208				2012-03-11	2011							0	0	0	0	0363-2415		WOS:000288953100008
J	Fock, Heino O.							Natura 2000 and the European Common Fisheries Policy						MARINE POLICY			35	2			181	188		10.1016/j.marpol.2010.09.003			2012-03-11	2011	The implementation of the Natura 2000 network of marine protected areas under the European Habitats Directive (92/43/EEC) has far-reaching implications for fisheries To date no consistent approaches have been established to develop fisheries management measures in Natura 2000 areas and no European member state has proposed any fisheries measures to the European Commission for consideration under …						1	0	1	1	0308-597X		CCC:000285440200010
J	McClanahan, T. R.							Coral reef fish communities in management systems with unregulated fishing and small fisheries closures compared with lightly fished reefs - Maldives vs. Kenya						AQUATIC CONSERVATION-MARINE AND FRESHWATER ECOSYSTEMS			21	2			186	198		10.1002/aqc.1172			MAR-APR 2011	2011	1. This study presents a comparison of the benthic cover and fish communities in three widely different management systems: (1) a heavily utilized subsistence fishery (yields > 5Mg km(-2) yr(-1)); (2) moderately sized and well enforced fisheries closures (similar to 9% of the nearshore area) surrounded by heavy fishing; and (3) a more lightly used management system (yields < 5Mg km(-2) yr(-1)).2.…						1	0	2	2	1052-7613		WOS:000288543900009
J	Olavo, George; Costa, Paulo A. S.; Martins, Agnaldo S.; Ferreira, Beatrice P.				Martins, Agnaldo/F-1615-2011			Shelf-edge reefs as priority areas for conservation of reef fish diversity in the tropical Atlantic						AQUATIC CONSERVATION-MARINE AND FRESHWATER ECOSYSTEMS			21	2			199	209		10.1002/aqc.1174			MAR-APR 2011	2011	1. Data from fishing surveys employing bottom long-lines were analysed to characterize the diversity, assemblages and distribution patterns of demersal fish along the Brazilian outer shelf and upper slope, between latitudes 13 degrees S and 22 degrees S.2. Non-metric multi-dimensional scaling (MDS) and cluster analysis indicate three distinct species assemblages separated primarily by depth (the …						0	0	1	1	1052-7613		WOS:000288543900010
J	Font, Toni; Lloret, Josep							Biological implications of recreational shore angling and harvest in a marine reserve: the case of Cape Creus						AQUATIC CONSERVATION-MARINE AND FRESHWATER ECOSYSTEMS			21	2			210	217		10.1002/aqc.1167			MAR-APR 2011	2011	1. Recreational shore fishing along the coast of the marine reserve of Cap de Creus (NW Mediterranean) was studied in 2007 and 2009 based on roving creel surveys (on-site angler surveys during which anglers' harvests are examined by the survey clerk). The study aimed to assess the biological impacts of this leisure activity on coastal fish stocks and the potential risks arising from the use of ex…						0	0	0	0	1052-7613		WOS:000288543900011
J	Ennis, G. P.							Closed areas as a conservation strategy in the Newfoundland lobster fishery						Biodiversity (Ottawa)			12	1			11	20		10.1080/14888386.2011.574427			2012-03-11	2011	The Fisheries Resource Conservation Council (FRCC) reviewed lobster resource conservation in Atlantic Canada and concluded in its 1995 report that under current management regimes the risk of recruitment failure was unacceptably high because of the low level of egg production. It recommended implementation of measures to reduce the overall level of exploitation on the resource. Closed areas were …						0	0	1	1	1488-8386		BIOSIS:PREV201100515424
J	McClanahan, T.; Karnauskas, M.							Relationships between benthic cover, current strength, herbivory, and a fisheries closure in Glovers Reef Atoll, Belize						CORAL REEFS			30	1			9	19		10.1007/s00338-010-0690-6			2012-03-11	2011	Benthic cover, current strengths, and fish abundance and diversity were examined on 150 lagoonal patch reefs and mapped to determine their distribution, inter-relationships, and relationship to the fisheries closure in Glovers Reef Atoll. Current strength was highest at both the northern and southern ends of the atoll and largely controlled by local wind and weakly by tidal forcing. Benthic funct…						4	0	3	4	0722-4028		WOS:000286940800002
J	White, Crow; Costello, Christopher							Matching spatial property rights fisheries with scales of fish dispersal						ECOLOGICAL APPLICATIONS			21	2			350	362		10.1890/09-1188.1			2012-03-11	2011	Regulation of fisheries using spatial property rights can alleviate competition for high-value patches that hinders economic efficiency in quota-based, rights-based, and open-access management programs. However, efficiency gains erode when delineation of spatial rights constitutes incomplete ownership of the resource, thereby degrading its local value and promoting overexploitation. Incomplete ow…						3	0	1	3	1051-0761		WOS:000289893500006
J	Doma, Dok; Yakupitiyage, Amararatne							A policy alternative for lagoon management: case study of Sre Ambel coastal marine fisheries, Cambodia						JOURNAL OF COASTAL CONSERVATION			15	1			23	35		10.1007/s11852-010-0117-0			2012-03-11	2011	Sre Ambel is the most productive coastal area for marine fisheries in Cambodia. This paper explores the management concept of extractive reserve instruments to find the most effective application in the coastal areas of Cambodia. Since there are various extractive models in the world, the most important objective is to determine which extractive reserve model is best suited to real practices wher…						0	0	0	0	1400-0350		WOS:000289363900003
J	Briggs, John C.							Marine extinctions and conservation						MARINE BIOLOGY			158	3			485	488		10.1007/s00227-010-1596-0			2012-03-11	2011	In contrast to the large number of terrestrial extinctions that have taken place over the past 12,000 years, there have apparently been very few marine extinctions. But these small losses should not be reason for complacency. During the past 50 years, government supported, commercial fishing has resulted in the collapse of about a thousand populations that once supplied most of the world's seafoo…						1	0	1	1	0025-3162		WOS:000287525100001
J	Meyer, John J.; Byers, James E.							Human-driven spatial and temporal shift in trophodynamics in the Gulf of Maine, USA						MARINE BIOLOGY			158	3			631	638		10.1007/s00227-010-1587-1			2012-03-11	2011	Utilizing marine protected areas (MPAs) to isolate the ecological effects of human influence can help us understand our effect on systems and foster ecosystem-based approaches to management. Specifically, examining invertebrate prey community dynamics inside and outside an MPA may provide a measure of how altering human influence (i.e., certain fishing pressures) affects ecosystem interactions. W…						0	0	0	0	0025-3162		WOS:000287525100014
J	Knudby, Anders; Roelfsema, Chris; Lyons, Mitchell; Phinn, Stuart; Jupiter, Stacy							Mapping Fish Community Variables by Integrating Field and Satellite Data, Object-Based Image Analysis and Modeling in a Traditional Fijian Fisheries Management Area						REMOTE SENSING			3	3			460	483		10.3390/rs3030460			2012-03-11	2011	The use of marine spatial planning for zoning multi-use areas is growing in both developed and developing countries. Comprehensive maps of marine resources, including those important for local fisheries management and biodiversity conservation, provide a crucial foundation of information for the planning process. Using a combination of field and high spatial resolution satellite data, we use an e…						0	0	0	0	2072-4292		WOS:000306745800003
J	Freitas, Matheus Oliveira; de Moura, Rodrigo Leao; Francini-Filho, Ronaldo Bastos; Minte-Vera, Carolina Viviana							Spawning patterns of commercially important reef fish (Lutjanidae and Serranidae) in the tropical western South Atlantic						SCIENTIA MARINA			75	1			135	146		10.3989/scimar.2011.75n1135			2012-03-11	2011	Although information on the spawning seasons of commercially important snappers (Lutjanidae) and groupers (Serranidae, subfamily Epinephelinae) is available for the north and central west Atlantic, there is little information for the tropical western South Atlantic (Brazil). As a consequence, there are few fishery regulations in this entire region that take into consideration such information. In…						3	0	3	3	0214-8358		WOS:000289754600014
J	Moustakas, Aristides; Silvert, William							Spatial and temporal effects on the efficacy of marine protected areas: implications from an individual based model						STOCHASTIC ENVIRONMENTAL RESEARCH AND RISK ASSESSMENT			25	3	SI		403	413		10.1007/s00477-010-0411-2			2012-03-11	2011	We have developed a spatially explicit model that simulates the interaction between fish and fishers based on past fish location, abundance and fish dispersal. We have examined four scenarios for the design and management of Marine Protected Areas (MPA) and for each we simulated fish biomass and fish catches: (1) No MPA. (2) A single MPA located at a feeding area. (3) A single MPA designed to max…						3	0	2	3	1436-3240		WOS:000287592200010
J	Gutierrez, Nicolas L.; Hilborn, Ray; Defeo, Omar				Gutierrez, Nicolas/D-4026-2009			Leadership, social capital and incentives promote successful fisheries						NATURE			470	7334			386	389		10.1038/nature09689			FEB 17 2011	2011	One billion people depend on seafood as their primary source of protein and 25% of the world's total animal protein comes from fisheries(1). Yet a third of fish stocks worldwide are overexploited or depleted(1,2). Using individual case studies, many have argued that community-based co-management(3) should prevent the tragedy of the commons(4) because cooperative management by fishers, managers an…						36	0	21	36	0028-0836		WOS:000287409100040
J	Peterson, Nicole D.							Excluding to include: (Non)participation in Mexican natural resource management						AGRICULTURE AND HUMAN VALUES			28	1			99	107		10.1007/s10460-010-9258-x			2012-02-11	2011	Participatory processes are often intended to encourage inclusion of multiple perspectives in defining management means and goals. However, ideas about the legitimacy of certain uses and users of the resources can often lead to exclusion from participation. In this way, participation can be transformed from a process of inclusion of various resource users to one of exclusion. Using a case study f…						0	0	0	0	0889-048X		WOS:000286665900008
J	Gruess, Arnaud; Kaplan, David M.; Guenette, Sylvie; Roberts, Callum M.; Botsford, Louis W.				Kaplan, David/G-5230-2010			Consequences of adult and juvenile movement for marine protected areas						BIOLOGICAL CONSERVATION			144	2			692	702		10.1016/j.biocon.2010.12.015			2012-02-11	2011	Adult and juvenile mobility has a considerable influence on the functioning of marine protected areas. It is recognized that adult and juvenile movement reduces the core benefits of protected areas, namely protecting the full age-structure of marine populations, while at the same time perhaps improving fisheries yield over the no-reserve situation through export of individuals from protected area…						9	0	7	9	2012-06-07		WOS:000287897100008
J	Giakoumi, Sylvaine; Grantham, Hedley S.; Kokkoris, Giorgos D.; Possingham, Hugh P.				Possingham, Hugh/B-1337-2008			Designing a network of marine reserves in the Mediterranean Sea with limited socio-economic data						BIOLOGICAL CONSERVATION			144	2			753	763		10.1016/j.biocon.2010.11.006			2012-02-11	2011	The present study is the first to determine priorities for the location of marine reserves using spatial prioritization software in the eastern Mediterranean Sea. We used biophysical data from visual census surveys on: fish species abundance, presence of various habitat types, and percent coverage of seagrasses and canopy algae. Efficient conservation planning requires spatially explicit informat…						2	0	1	2	2012-06-07		WOS:000287897100015
J	Hoskin, M. G.; Coleman, R. A.; von Carlshausen, E.; Davis, C. M.							Variable population responses by large decapod crustaceans to the establishment of a temperate marine no-take zone						CANADIAN JOURNAL OF FISHERIES AND AQUATIC SCIENCES			68	2			185	200		10.1139/F10-143			2012-02-11	2011	In 2003, an area adjacent to Lundy Island was designated as the United Kingdom's first no-take zone (NTZ) for nature conservation. The only significant fishery at Lundy was for lobster ( Homarus gammarus L.) and various crabs. The Lundy NTZ provided an opportunity to test hypotheses about the recovery of crustacean populations from fishing. Using an experimental potting program, we simultaneously…						2	0	1	2	0706-652X		WOS:000288098700001
J	Caselle, Jennifer E.; Hamilton, Scott L.; Schroeder, Donna M.; Love, Milton S.; Standish, Julie D.; Rosales-Casian, Jorge A.; Sosa-Nishizaki, Oscar							Geographic variation in density, demography, and life history traits of a harvested, sex-changing, temperate reef fish						CANADIAN JOURNAL OF FISHERIES AND AQUATIC SCIENCES			68	2			288	303		10.1139/F10-140			2012-02-11	2011	Geographic variation in ecological and environmental factors may lead to intraspecific differences among populations. For the California sheephead (Semicossyphus pulcher), an important predator in kelp forests and a target of commercial and recreational fisheries, we evaluated the degree to which different populations exhibited variation in density, demography, and life history traits. We assesse…						6	0	6	6	0706-652X		WOS:000288098700010
J	Babcock, Elizabeth A.; MacCall, Alec D.							How useful is the ratio of fish density outside versus inside no-take marine reserves as a metric for fishery management control rules?						CANADIAN JOURNAL OF FISHERIES AND AQUATIC SCIENCES			68	2			343	359		10.1139/F10-146			2012-02-11	2011	A management strategy evaluation ( based on five species in the California, USA, nearshore fishery) of control rules that reduce relative fishing effort as a function of the ratio of fish density outside versus inside no-take marine reserves ( as a measure of depletion) showed that although the control rules allowed effort to increase at first, in the long term, they were effective at maintaining…						4	0	4	4	0706-652X		WOS:000288098700014
J	Wakefield, Ewan D.; Phillips, Richard A.; Trathan, Philip N.; Arata, Javier; Gales, Rosemary; Huin, Nic; Robertson, Graham; Waugh, Susan M.; Weimerskirch, Henri; Matthiopoulos, Jason							Habitat preference, accessibility, and competition limit the global distribution of breeding Black-browed Albatrosses						ECOLOGICAL MONOGRAPHS			81	1			141	167		10.1890/09-0763.1			2012-02-11	2011	Telemetry methods and remote sensing now make it possible to record the spatial usage of wide-ranging marine animals and the biophysical characteristics of their pelagic habitats. Furthermore, recent statistical advances mean that such data can be used to test ecological hypotheses and estimate species' distributions. Black-browed Albatrosses Thalassarche melanophrys are highly mobile marine pred…						3	0	3	3	2012-12-15		WOS:000289230700009
J	McClanahan, T. R.; Hicks, C. C.							Changes in life history and ecological characteristics of coral reef fish catch composition with increasing fishery management						FISHERIES MANAGEMENT AND ECOLOGY			18	1			50	60		10.1111/j.1365-2400.2010.00768.x			2012-02-11	2011	P>Length, life history and ecological characteristics of landed fish communities were studied over a 10-year period to test theories of fishing disturbance during a time of increased gear and closure management in heavily utilised fisheries. It was predicted that with greater management restrictions: (1) the earliest and fastest responses in the fishery will be seen in those species with faster t…						2	0	2	2	0969-997X		WOS:000285999500005
J	Veilleux, Heather D.; van Herwerden, Lynne; Evans, Richard D.; Travers, Michael J.; Newman, Stephen J.				Travers, Michael/F-7765-2011; van Herwerden, Lynne/I-1087-2012			Strong genetic subdivision generates high genetic variability among eastern and western Australian populations of Lutjanus carponotatus (Richardson)						FISHERIES RESEARCH			108	1			74	80		10.1016/j.fishres.2010.11.026			2012-02-11	2011	Lutjanus carponotatus ranges from the Indian Ocean to northern Australia and Papua New Guinea and is an important species for both commercial and recreational fisheries. Due to its life history characteristics and fishing pressures, L carponotatus is vulnerable to overfishing and suitable management is essential. This phylogenetic and population genetic study assessed the population genetic struc…						0	0	0	0	0165-7836		WOS:000287428500010
J	Hussein, C.; Verdoit-Jarraya, M.; Pastor, J.; Ibrahim, A.; Saragoni, G.; Pelletier, D.; Mahevas, S.; Lenfant, P.				Pelletier, Dominique/A-1649-2011; Lenfant, Philippe/D-3908-2009			Assessing the impact of artisanal and recreational fishing and protection on a white seabream (Diplodus sargus sargus) population in the north-western Mediterranean Sea using a simulation model. Part 1: Parameterization and simulations						FISHERIES RESEARCH			108	1			163	173		10.1016/j.fishres.2010.12.017			2012-02-11	2011	This study focuses on the parameterization of a model describing the dynamics of an exploited population and aims at improving management practices by simulating various measures. The study species is white seabream, an important resource exploited by the mixed fisheries of the French Catalan coast, where the Cerbere-Banyuls marine reserve was created more than 30 years ago. We used the ISIS-Fish…						2	0	2	2	0165-7836		WOS:000287428500021
J	Hussein, C.; Verdoit-Jarraya, M.; Pastor, J.; Ibrahim, A.; Saragoni, G.; Pelletier, D.; Mahevas, S.; Lenfant, P.				Pelletier, Dominique/A-1649-2011; Lenfant, Philippe/D-3908-2009			Assessing the impact of artisanal and recreational fishing and protection on a white seabream (Diplodus sargus sargus) population in the north-western Mediterranean Sea, using a simulation model. Part 2: Sensitivity analysis and management measures						FISHERIES RESEARCH			108	1			174	183		10.1016/j.fishres.2010.12.018			2012-02-11	2011	In this paper, the ISIS-fish model was used to assess the impact of spatial and seasonal management measures on the dynamics of the white seabream population (Diplodus sargus sargus) in the French Catalan fishery (north-western Mediterranean). This work is the second part of a paper (Hussein et al., 2011) which describes the parameterization of the model. Here we carry out a sensitivity analysis …						1	0	1	1	0165-7836		WOS:000287428500022
J	Jimenez, Haizea; Dumas, Pascal; Leopold, Marc; Ferraris, Jocelyne							Invertebrate harvesting on tropical urban areas: Trends and impact on natural populations (New Caledonia, South Pacific)						FISHERIES RESEARCH			108	1			195	204		10.1016/j.fishres.2010.12.021			2012-02-11	2011	The gathering of invertebrates during low tides is a traditional activity across the Pacific islands, but it still remains poorly documented. Recreational invertebrate harvesting was investigated in 2008 and 2009 in the coastal/islet reef flats surrounding Noumea, the main urbanized area in New Caledonia (South Pacific). Human frequentation, harvesting effort, captures and their impacts on the de…						1	0	1	1	0165-7836		WOS:000287428500024
J	Stewart, John							Evidence of age-class truncation in some exploited marine fish populations in New South Wales, Australia						FISHERIES RESEARCH			108	1			209	213		10.1016/j.fishres.2010.11.017			2012-02-11	2011	Exploited reef-associated species in south-eastern Australia have evolved life-history strategies to ensure population persistence through periods that are unsuitable for recruitment. They are characterized by considerable potential longevity (20-50 years), sexual maturation at relatively young ages (2-4 years old) and variable recruitment patterns. The age compositions in landings of the major r…						0	1	0	1	0165-7836		WOS:000287428500026
J	Font, Toni; Lloret, Josep							Socioeconomic implications of recreational shore angling for the management of coastal resources in a Mediterranean marine protected area						FISHERIES RESEARCH			108	1			214	217		10.1016/j.fishres.2010.11.022			2012-02-11	2011	Roving creel surveys of recreational shore fishing were conducted in 2007 in the marine reserve of Cap de Creus (NW Mediterranean) to assess the socioeconomic implications of this leisure activity. Even though an angler spends on average around 600(sic) per year in fishing supplies and car fuel, the economic impact for the villages belonging to the marine reserve is limited because most (95%) ang…						1	0	1	1	0165-7836		WOS:000287428500027
J	Sundblad, Goran; Bergstrom, Ulf; Sandstrom, Alfred							Ecological coherence of marine protected area networks: a spatial assessment using species distribution models						JOURNAL OF APPLIED ECOLOGY			48	1			112	120		10.1111/j.1365-2664.2010.01892.x			2012-02-11	2011	P>1. The juvenile stages of fish are often dependent on specific habitat types for their survival. Protecting these habitats may be crucial for maintaining strong adult stocks. The Natura 2000 network of the European Union offers protection of marine habitats that are essential for the recruitment of many fish species. By protecting these critical habitats the network may be important for maintai…						2	0	1	2	0021-8901		WOS:000286000100014
J	Batista, Marisa I.; Baeta, Filipa; Costa, Maria J.; Cabral, Henrique N.				Cabral, Henrique/D-5201-2011; Batista, Marisa/B-3594-2012; Costa, Maria Jose /B-4007-2012			MPA as management tools for small-scale fisheries: The case study of Arrabida Marine Protected Area (Portugal)						OCEAN & COASTAL MANAGEMENT			54	2			137	147		10.1016/j.ocecoaman.2010.10.032			2012-02-11	2011	Marine protected areas (MPA) have been widely suggested as a tool for both fisheries management and conservation goals. These multiple objectives are hard to achieve simultaneously as sustainable development implies the balance between the specific interests of conservation and economical activities. MPA success, namely for fisheries management, entails the implementation of restrictive measures …						0	0	0	0	0964-5691		WOS:000286996100005
J	Matic-Skoko, S.; Staglicic, N.; Pallaoro, A.; Kraljevic, M.; Dulcic, J.; Tutman, P.; Dragicevic, B.							Effectiveness of conventional management in Mediterranean type artisanal fisheries						ESTUARINE COASTAL AND SHELF SCIENCE			91	2			314	324		10.1016/j.ecss.2010.10.029			JAN 20 2011	2011	Artisanal fisheries throughout the Mediterranean region are managed mostly by applying gear specific regulations. The data about the extent and dynamics by which littoral fish resources respond to commonly proposed changes of such regulations are lacking. Here the results of a 15 year (1995-2009) monitoring programme of littoral fish resources in a pilot region of island Vis aquatorium, central A…						3	0	1	3	0272-7714		WOS:000286715500016
J	Zhang, Junjie							Behavioral Response to Stock Abundance in Exploiting Common-Pool Resources						B E JOURNAL OF ECONOMIC ANALYSIS & POLICY			11	1			52	52					2011	2011	Successful regulation of common-pool resources calls for a better understanding of resource exploitation behavior. This paper introduces an approach that can measure fishermen's responsiveness to stock changes more accurately. In order to deal with the challenge of the latent fish stock, I adopt the method proposed by Zhang and Smith (2011) that derives a stock index from a heterogeneous producti…						0	0	0	0	1935-1682		CCC:000294466000007
J	Cordova-Lepe, F.; Gonzalez-Olivares, E.; Pinto, M.							Source-sink impulsive bioeconomic models: Seasonal closures with fixed length						JOURNAL OF DIFFERENCE EQUATIONS AND APPLICATIONS			17	5			721	735	PII 935976170	10.1080/10236190903179343			2011	2011	The dynamics of four source-sink models for an exploited resource under a constant fishing effort are here presented. Two models are described by ordinary differential equations; the other two are expressed by impulsive differential equations systems. A continuous time growth function for the resource is assumed for each of the four model. The impulsiveness in the harvest activity among fixed sea…						0	0	0	0	1023-6198		WOS:000290430900006
J	Probst, Wolfgang N.; Berth, Ulrich; Stepputtis, Daniel; Hammer, Cornelius							CATCH PATTERNS OF THE GERMAN BALTIC SEA TRAWL FLEET TARGETING DEMERSAL SPECIES BETWEEN 2006 AND 2009						ACTA ICHTHYOLOGICA ET PISCATORIA			41	4			315	325		10.3750/AIP2011.41.4.08			2011	2011	Background. The data collection of commercial fisheries has been formalized by the EU data collection framework (DCF). Besides gaining relevant information to fisheries management under the Common Fisheries Policy, the data of the DCF will gain importance in assessing the impacts of fishing on the ecosystem of the Baltic Sea.Materials and methods. The catch of the demersal German Baltic Sea trawl…						0	0	0	0	0137-1592		WOS:000299844300008
J	Goetz, A.; Kerwath, S. E.; Attwood, C. G.; Sauer, W. H. H.							An alternative method for estimating the status of resident reef fish stocks, based on differential fishing effort across a marine reserve boundary						AFRICAN JOURNAL OF MARINE SCIENCE			33	1			107	113		10.2989/1814232X.2011.572357			2011	2011	The stock status of roman Chrysoblephus laticeps was estimated in the Goukamma, a temperate South African marine protected area (MPA). Standardised catch per unit effort (CPUE) from a controlled angling survey on both sides of the MPA border was employed to extrapolate the CPUE at zero fishing mortality. Converted into biomass, the estimate (61% of unexploited biomass) lay midway between those of…						0	0	0	0	1814-232X		WOS:000291498700010
J	Richardson, T. J.; Potts, W. M.; Santos, C. V.; Sauer, W. H. H.							Comparison of the population structure and life-history parameters of Diplodus capensis (Sparidae) in exploited and unexploited areas of southern Angola						AFRICAN JOURNAL OF MARINE SCIENCE			33	2			191	201		10.2989/1814232X.2011.600286			2011	2011	Blacktail seabream Diplodus capensis were sampled from proximate (10 km apart) exploited and unexploited areas in southern Angola to compare their population structures and life-history parameters. Females dominated the larger size and older age classes in the unexploited area. In the exploited area the length and age frequency distributions were more equitable, but there was a lack of large and …						2	0	1	2	1814-232X		WOS:000299037200001
J	Huisamen, J.; Kirkman, S. P.; Watson, L. H.; Cockcroft, V. G.; Pistorius, P. A.							Recolonisation of the Robberg Peninsula (Plettenberg Bay, South Africa) by Cape fur seals						AFRICAN JOURNAL OF MARINE SCIENCE			33	3			453	461		10.2989/1814232X.2011.637349			2011	2011	The Cape fur seal Arctocephalus pusillus pusillus colony at Robberg Peninsula, Plettenberg Bay, on the south-east coast of South Africa, was driven to extinction by indiscriminate harvesting by the late 1800s. Seals only began to recolonise this site in the 1990s. This study describes the recolonisation process from 2000 to 2009, exploring both within-and between-year count data of seals using th…						2	0	2	2	1814-232X		WOS:000299037500010
J	Lozano, M.; Baro, J.; Garcia, T.; Frias, A.; Rey, J.; Baez, J. C.							Loggerhead sea turtle bycatch data in artisanal fisheries within a marine protected area: fishermen surveys versus scientific observations						ANIMAL BIODIVERSITY AND CONSERVATION			34	1			31	34					2011	2011	Loggerhead sea turtle bycatch data in artisanal fisheries within a marine protected area: fishermen surveys versus scientific observations.-Loggerhead sea turtles can be incidentally captured by artisanal gears but information about the impact of this fishing is inconsistent and scarce. Recent studies have observed that the bycatch, or incidental catch rate, in fishermen surveys is irregular. The…						0	0	0	0	1578-665X		WOS:000293196100004
J	Samy, M.; Sanchez Lizaso, J. L.; Forcada, A.							Status of marine protected areas in Egypt						ANIMAL BIODIVERSITY AND CONSERVATION			34	1			165	177					2011	2011	Status of marine protected areas in Egypt.-Egypt has sought to protect its natural resources and marine biodiversity by establishing a network of six MPAs that are generally located in the Gulf of Aqaba and the Red Sea; most of them include interconnected marine and terrestrial sectors based on conserving coral reefs and accompanying systems. We assessed the present status of MPA networks that sh…		Conference on SIEBM 2010	SEP 06-10, 2010		Univ Alicante, Alicante, SPAIN	0	0	0	0	1578-665X		WOS:000293196100016
J	Ojeda-Martinez, C.; Bayle-Sempere, J. T.; Sanchez-Jerez, P.; Salas, F.; Stobart, B.; Goni, R.; Falcon, J. M.; Graziano, M.; Guala, I.; Higgins, R.; Vandeperre, F.; Le Direach, L.; Martin-Sosa, P.; Vaselli, S.							Review of the effects of protection in marine protected areas: current knowledge and gaps						ANIMAL BIODIVERSITY AND CONSERVATION			34	1			191	203					2011	2011	Review of the effects of protection in marine protected areas: current knowledge and gaps.-The effectiveness of marine protected areas (MPAs) and the conservation of marine environments must be based on reliable information on the quality of the marine environment that can be obtained in a reasonable timeframe. We reviewed studies that evaluated all aspects related to the effectiveness of MPAs in…		Conference on SIEBM 2010	SEP 06-10, 2010		Univ Alicante, Alicante, SPAIN	0	0	0	0	1578-665X		WOS:000293196100018
J	Adams, Vanessa M.; Mills, Morena; Jupiter, Stacy D.; Pressey, Robert L.				Adams, Vanessa/A-3834-2012			Improving social acceptability of marine protected area networks: A method for estimating opportunity costs to multiple gear types in both fished and currently unfished areas						BIOLOGICAL CONSERVATION			144	1			350	361		10.1016/j.biocon.2010.09.012			2012-01-11	2011	We present a novel method for calculating the opportunity costs to fishers from their displacement by the establishment of marine protected areas (MPAs). We used a fishing community in Kubulau District, Fiji to demonstrate this method. We modelled opportunity costs as a function of food fish abundance and probability of catch, based on gear type and market value of species. Count models (includin…						3	0	3	3	2012-06-07		WOS:000287168100037
J	Koeck, Barbara; Pastor, Jeremy; Larenie, Laetitia; Astruch, Patrick; Saragoni, Gilles; Jarraya, Marion; Lenfant, Philippe				Lenfant, Philippe/D-3908-2009			EVALUATION OF IMPACT OF ARTIFICIAL REEFS ON ARTISANAL FISHERIES: NEED FOR COMPLEMENTARY APPROACHES						BRAZILIAN JOURNAL OF OCEANOGRAPHY			59		1		1	11					2011	2011	In a general context of fisheries decline due to overfishing and to other phenomena such as climate change, it appears to be crucial to implement a sustainable management of natural resources by finding a balance between conservation and exploitation purposes. Artificial reefs (ARs) have recently become one of the existing management tools, often in combination with fishing quotas or marine prote…		9th International Conference on Artificial Reefs and Related Aquatic Habitats (CARAH)	NOV 08-13, 2009		Curitiba, BRAZIL	0	0	0	0	1679-8759		WOS:000295722300002
J	Ulas, Ali; Lok, Altan; Duzbastilar, F. Ozan; Ozgul, Aytac; Metin, Cengiz							A NEW ARTIFICIAL REEF DESIGN FOR OCTOPUS (Octopus vulgaris CUVIER, 1797) IN THE AEGEAN SEA AND PRELIMINARY RESULTS						BRAZILIAN JOURNAL OF OCEANOGRAPHY			59		1		21	25					2011	2011	This study was carried out in the Gulf of Dzmir in the Aegean Sea between June 2006 and November 2008. The purpose was the creation of a new concept of the artificial reef for Octopus vulgaris, with a view to establishing new artificial reef sites to be used in the fisheries management of this species (MPA, NTZ or fishing areas). First, the main characteristics of natural octopus nests were recor…		9th International Conference on Artificial Reefs and Related Aquatic Habitats (CARAH)	NOV 08-13, 2009		Curitiba, BRAZIL	0	0	0	0	1679-8759		WOS:000295722300004
J	Lowry, Michael; Folpp, Heath; Gregson, Marcus; Mckenzie, Rob							A COMPARISON OF METHODS FOR ESTIMATING FISH ASSEMBLAGES ASSOCIATED WITH ESTUARINE ARTIFICIAL REEFS						BRAZILIAN JOURNAL OF OCEANOGRAPHY			59		1		119	131					2011	2011	Monitoring strategies which adequately represent the entire community associated with artificial structures will enable more informed decisions regarding the broader effects of artificial structures and their role in the management of fisheries resources. Despite the widespread application of a range of in situ visual monitoring methodologies used in the assessment of artificial structures, the r…		9th International Conference on Artificial Reefs and Related Aquatic Habitats (CARAH)	NOV 08-13, 2009		Curitiba, BRAZIL	0	0	0	0	1679-8759		WOS:000295722300014
J	Pascaline, Bodilis; Catherine, Seytre; Charbonnel, Eric; Patrice, Francour							MONITORING OF THE ARTIFICIAL REEF FISH ASSEMBLAGES OF GOLFE JUAN MARINE PROTECTED AREA (FRANCE, NORTH-WESTERN MEDITERRANEAN)						BRAZILIAN JOURNAL OF OCEANOGRAPHY			59		1		167	176					2011	2011	Artificial reefs were deployed within the Golfe-Juan marine protected area (Alpes-Maritimes coast, France, Northwestern Mediterranean) created in 1981. This no-take area is fully protected since its establishment, except in 2004 when some anthropic activities were, exceptionally, authorized. Moreover, no park rangers to prevent poaching since 2002 occur. In order to carry out a long term monitori…		9th International Conference on Artificial Reefs and Related Aquatic Habitats (CARAH)	NOV 08-13, 2009		Curitiba, BRAZIL	0	0	0	0	1679-8759		WOS:000295722300018
J	Richards, Benjamin L.; Williams, Ivor D.; Nadon, Marc O.; Zgliczynski, Brian J.							A TOWED-DIVER SURVEY METHOD FOR MESOSCALE FISHERY-INDEPENDENT ASSESSMENT OF LARGE-BODIED REEF FISHES						BULLETIN OF MARINE SCIENCE			87	1			55	74		10.5343/bms.2010.1019			2012-01-11	2011	Coral reef fishes are ecologically and economically important, particularly the largest species and individuals, which often include top predators, as they show disproportionate fecundity and generally make up the basis of nearshore fisheries. Large-bodied coral reef fishes can be difficult to sample using conventional survey methods, because they are often relatively rare, have comparatively lar…						5	0	5	5	1977-07-01		WOS:000286702000005
J	Alban, Frederique; Frangoudes, Katia; Fresard, Marjolaine							Kelp harvesting fleet dynamics and the fleet's dependence on Laminaria forests in the Iroise Sea (North Finistere, France)						CAHIERS DE BIOLOGIE MARINE			52	4	SI		507	516					2011	2011	This paper addresses the question of economic viability of a fishing fleet, its dependence on main target species, and its capacity to be adapted to future constraints. The analysis relies on a field survey of a small-scale inshore fishing fleet of the Iroise Sea, in Brittany, seasonally harvesting seaweeds. Kelp forests are important biota both as habitat provider and producer, but are subject t…						1	0	1	1	2012-07-23		WOS:000296122200015
J	Anonymous							The Marine Environment and Fisheries of Georges Bank, Nova Scotia: Consideration of the Potential Interactions Associated with Offshore Petroleum Activities.						Canadian Technical Report of Fisheries and Aquatic Sciences			2945				XXVI	492,XXIV					2011	2011	Georges Bank is located in the offshore waters between southwest Nova Scotia and Cape Cod. It straddles the Canada-United States maritime boundary, with the northeast portion of the Bank in Canadian waters. In 1988, a moratorium was placed on offshore petroleum activities (i.e. exploration, drilling, and development) on the Canadian portion of the Bank and much of Northeast Channel. In 1999, the …						0	0	0	0	0706-6457; 0706-6570		BIOSIS:PREV201200119077
J	Jessen, Sabine							A Review of Canada's Implementation of the Oceans Act since 1997From Leader to Follower?						COASTAL MANAGEMENT			39	1			20	56	PII 933317415	10.1080/08920753.2011.544537			2011	2011	With the passage of the Oceans Act in 1997, Canada was considered a global leader in modern oceans management. With provisions for marine protected areas (MPAs) and integrated oceans management, the Oceans Act was meant to address the existing piecemeal approach to oceans management, by moving to a new approach founded in the concepts of sustainable development and ecosystem-based management. How…						4	0	0	4	0892-0753		WOS:000287202800003
J	Cinner, Joshua E.; David, Gilbert							The Human Dimensions of Coastal and Marine Ecosystems in the Western Indian Ocean Introduction						COASTAL MANAGEMENT			39	4	SI		351	357		10.1080/08920753.2011.589207			2011	2011	As conservation theory and practice moves away from excluding resource users to creating partnerships with them, it is becoming increasingly clear that marine conservation is as much about understanding people as it is about understanding ecological processes. Social, economic, and cultural factors can influence whether and how individuals and communities overexploit resources or cooperate to con…						1	0	0	1	0892-0753		WOS:000299927200001
J	Daw, Tim M.; Cinner, Joshua E.; McClanahan, Timothy R.; Graham, Nicholas A. J.; Wilson, Shaun K.							Design Factors and Socioeconomic Variables Associated with Ecological Responses to Fishery Closures in the Western Indian Ocean						COASTAL MANAGEMENT			39	4	SI		412	424		10.1080/08920753.2011.589224			2011	2011	We assessed the ability of socioeconomic variables (population size, perceived infringement, and community infrastructure) and design features (closure age and area) to predict ecological indicators of "success" in seventeen coral-reef fishery closures in the Western Indian Ocean. Success was measured as absolute fish biomass and coral cover in closures, and the response ratio of these variables …						1	0	0	1	0892-0753		WOS:000299927200005
J	Grilo, Catarina							Institutional Interplay in Networks of Marine Protected Areas with Community-Based Management						COASTAL MANAGEMENT			39	4	SI		440	458		10.1080/08920753.2011.589214			2011	2011	Institutional interplay, or the ability of one institution to affect another, is a key feature of multi-level environmental governance that can influence the performance of institutions, such as marine protected areas (MPAs). In the Western Indian Ocean (WIO), MPA networks are being created to meet top-down, internationally defined MPA targets, while simultaneously there is a strong regional focu…						0	0	0	0	0892-0753		WOS:000299927200007
J	Casiwan-Launio, Cheryll; Shinbo, Teruyuki; Morooka, Yoshinori							Island Villagers' Willingness to Work or Pay for Sustainability of a Marine Fishery Reserve: Case of San Miguel Island, Philippines						COASTAL MANAGEMENT			39	5			459	477		10.1080/08920753.2011.582573			2011	2011	Establishment of marine reserves or marine protected areas (MPAs) has emerged as a major coastal resource management tool in the Philippines. A major sustainability constraint is the enforcement of MPA and fisheries regulations. We contribute to the literature of using stated preference methods to investigate the local residents' willingness to work (WTW) and willingness to pay (WTP) for the cont…						1	0	0	1	0892-0753		WOS:000300161800001
J	Russ, Garry R.; Alcala, Angel C.							Enhanced biodiversity beyond marine reserve boundaries: The cup spillith over						ECOLOGICAL APPLICATIONS			21	1			241	250		10.1890/09-1197.1			2012-01-11	2011	Overfishing can have detrimental effects on marine biodiversity and the structure of marine ecosystems. No-take marine reserves (NTMRs) are much advocated as a means of protecting biodiversity and ecosystem structure from overharvest. In contrast to terrestrial protected areas, NTMRs are not only expected to conserve or recover biodiversity and ecosystems within their boundaries, but also to enha…						6	0	5	6	1051-0761		WOS:000288850200020
B	Baron, Nancy					Christensen, V; Maclean, J		The scientist as communicator						ECOSYSTEM APPROACHES TO FISHERIES: A GLOBAL PERSPECTIVE							295	303					2011	2011			Symposium on Thinking Big - A Global Look at Fisheries Science	2006-05-02		Vancouver, CANADA	0	0	0	0		978-0-52111-305-2	WOS:000293386600019
J	Liles, Michael J.; Jandres, Mauricio V.; Lopez, Wilfredo A.; Mariona, Georgina I.; Hasbun, Carlos R.; Seminoff, Jeffrey A.							Hawksbill turtles Eretmochelys imbricata in El Salvador: nesting distribution and mortality at the largest remaining nesting aggregation in the eastern Pacific Ocean						Endangered Species Research			14	1			23	30		10.3354/esr00338			2011	2011	El Salvador has a series of nesting beaches that together host the highest remaining nesting abundance of hawksbill turtles Eretmochelys imbricata in the eastern Pacific Ocean. However, the distribution of hawksbill turtle nesting and causes of hawksbill mortality along the Salvadoran coast are yet to be described. Here, we report on life history information of this population, including body siz…						3	0	3	4	1863-5407; 1613-4796		BIOSIS:PREV201100445197
J	Melbourne-Thomas, J.; Johnson, C. R.; Alino, P. M.; Geronimo, R. C.; Villanoy, C. L.; Gurney, G. G.				Melbourne-Thomas, Jessica/G-7995-2012			A multi-scale biophysical model to inform regional management of coral reefs in the western Philippines and South China Sea						ENVIRONMENTAL MODELLING & SOFTWARE			26	1			66	82		10.1016/j.envsoft.2010.03.033			2012-01-11	2011	The health and functioning of coral reef ecosystems worldwide is in decline, and in the face of increasing anthropogenic stress, the rate of decline of these important ecosystems is set to accelerate. Mitigation strategies at regional scales are costly, but nevertheless critical, as reef systems are highly connected across regions by ocean transport of both larval propagules and pollutants, It is…						6	0	5	6	1364-8152		WOS:000283891600009
J	Cope, Jason M.; Punt, Andre E.							Reconciling stock assessment and management scales under conditions of spatially varying catch histories						FISHERIES RESEARCH			107	2012-01-03			22	38		10.1016/j.fishres.2010.10.002			2012-01-11	2011	Spatial homogeneity is the exception, not the rule, for many marine populations. Data limitations or biological knowledge gaps, though, often drive the assumption of limited stock structuring; the subsequent mismatch of model spatial scale and biological stock structure may compromise management goals. Spatial considerations thus remain a major challenge in providing managers with the best inform…						1	0	1	1	0165-7836		WOS:000287113600003
J	Wattage, P.; Glenn, H.; Mardle, S.; Van Rensburg, T.; Grehan, A.; Foley, N.							Economic value of conserving deep-sea corals in Irish waters: A choice experiment study on marine protected areas						FISHERIES RESEARCH			107	2012-01-03			59	67		10.1016/j.fishres.2010.10.007			2012-01-11	2011	Deep-water corals are slow growing, fragile and vulnerable to the impacts of deep-water fisheries and the development activities of the offshore industries. In Ireland there is now evidence of major damage to deep-water corals linked to a recent expansion of the Irish deep-water fishery. This fishery uses trawls fitted with robust rock hopping gear and employs a high risk fishing technique, which…						2	0	0	2	0165-7836		WOS:000287113600006
J	Bartolino, Valerio; Colloca, Francesco; Taylor, Lorna; Stefansson, Gunnar				Stefansson, Gunnar/A-2209-2008			First implementation of a Gadget model for the analysis of hake in the Mediterranean						FISHERIES RESEARCH			107	2012-01-03			75	83		10.1016/j.fishres.2010.10.010			2012-01-11	2011	An age-length structured model was built for European hake Merluccius merluccius in the central Mediterranean Sea using Gadget. This analytical framework allowed to integrate multiple sources of information, including fisheries-dependent and fisheries-independent data, collected at different scales and aggregation levels. The model includes the two main fisheries targeting hake in the area, the t…						0	0	0	0	0165-7836		WOS:000287113600008
J	Aldon, Ma. E. T.; Fermin, A. C.; Agbayani, R. F.							Socio-cultural context of fishers' participation in coastal resources management in Anini-y, Antique in west central Philippines						FISHERIES RESEARCH			107	2012-01-03			112	121		10.1016/j.fishres.2010.10.014			2012-01-11	2011	The vicious cycle of poverty, overfishing and resource degradation in coastal communities in the Philippines calls for action that will address the problem of declining fish catch and degraded fish habitats. The literature has shown that an efficient and effective coastal management program can be instrumental in approaching this problem. In order to secure food and livelihood of fishers, the Sou…						0	0	0	0	0165-7836		WOS:000287113600012
J	Linke, Simon; Turak, Eren; Nel, Jeanne				Linke, Simon/G-5440-2010			Freshwater conservation planning: the case for systematic approaches						FRESHWATER BIOLOGY			56	1			6	20		10.1111/j.1365-2427.2010.02456.x			2012-01-11	2011	P>1. We review recent advances in systematic conservation planning in fresh waters. Most modern systematic planning approaches are based on the CARE principles: comprehensiveness, adequacy, representativeness and efficiency. Efficiency is usually provided by a complementarity-based strategy, aiming to select new conservation areas in the light of previously protected features. These strategies ha…						22	0	15	22	0046-5070		WOS:000285301600002
J	Fock, Heino							Integrating Multiple Pressures at Different Spatial and Temporal Scales: A Concept for Relative Ecological Risk Assessment in the European Marine Environment						HUMAN AND ECOLOGICAL RISK ASSESSMENT			17	1	SI		187	211	PII 933377191	10.1080/10807039.2011.538634			2011	2011	A Relative Ecological Risk Assessment model is presented with an emphasis on risk calculation and risk characterization. Several types of impacts are incorporated including mortality, competition, and disturbance effects at different spatial scales exemplifying fisheries effects on benthic communities, marine mammals, and birds. Fisheries sectors analyzed are beam trawlers, demersal otter trawler…						3	0	2	3	1080-7039		WOS:000287320100008
J	McGilliard, Carey R.; Hilborn, Ray; MacCall, Alec; Punt, Andre E.; Field, John C.							Can information from marine protected areas be used to inform control-rule-based management of small-scale, data-poor stocks?						ICES JOURNAL OF MARINE SCIENCE			68	1			201	211		10.1093/icesjms/fsq151			2012-01-11	2011	Many small-scale, nearshore fisheries lack the historical catch and survey information needed for conventional stock-assessment-based management. The potential use of the ratio of the density of fish outside a marine protected area to that inside it each year (the density ratio, DR) in a control rule is evaluated to determine the direction and magnitude of change in fishing effort in the next yea…						5	0	4	5	1054-3139		WOS:000285193900022
J	Priede, Imants G.; Godbold, Jasmin A.; Niedzielski, Tomasz; Collins, Martin A.; Bailey, David M.; Gordon, John D. M.; Zuur, Alain F.				Bailey, David/A-6240-2008; Godbold, Jasmin/F-1577-2012			A review of the spatial extent of fishery effects and species vulnerability of the deep-sea demersal fish assemblage of the Porcupine Seabight, Northeast Atlantic Ocean (ICES Subarea VII)						ICES JOURNAL OF MARINE SCIENCE			68	2			281	289		10.1093/icesjms/fsq045			2012-01-11	2011	We review information from scientific trawl surveys carried out between 1977 and 2002 in the Porcupine Seabight and Abyssal Plain area of the Northeast Atlantic (240-4865 m water depth). Since the late 1980s, commercial bottom-trawl fisheries targeting mainly roundnose grenadier (Coryphaenoides rupestris), black scabbardfish (Aphanopus carbo), and orange roughy (Hoplostethus atlanticus) have been…						2	0	2	2	1054-3139		WOS:000285194000004
J	Murillo, F. J.; Duran Munoz, P.; Altuna, A.; Serrano, A.							Distribution of deep-water corals of the Flemish Cap, Flemish Pass, and the Grand Banks of Newfoundland (Northwest Atlantic Ocean): interaction with fishing activities						ICES JOURNAL OF MARINE SCIENCE			68	2			319	332		10.1093/icesjms/fsq071			2012-01-11	2011	The distribution of deep-water corals of the Flemish Cap, Flemish Pass, and the Grand Banks of Newfoundland is described based on bycatch from Spanish/EU bottom trawl groundfish surveys between 40 and 1500 m depth. In all, 37 taxa of deep-water corals were identified in the study area: 21 alcyonaceans (including the gorgonians), 11 pennatulaceans, 2 solitary scleractinians, and 3 antipatharians. …						5	0	1	5	1054-3139		WOS:000285194000008
J	Khamis, Sara A.; Tchuenche, Jean M.; Lukka, Markku; Heilio, Matti							Dynamics of fisheries with prey reserve and harvesting						INTERNATIONAL JOURNAL OF COMPUTER MATHEMATICS			88	8			1776	1802		10.1080/00207160.2010.527001			2011	2011	A model for two fish species and one predator in a patchy environment is formulated using a deterministic model to study the dynamics of fishery in two homogeneous patches, a free fishing zone and a refuge for prey reserve in which fishing is prohibited. The system is analysed around steady states; the criteria for local and global stabilities are established. The existence of bionomic equilibriu…						1	0	0	1	0020-7160		WOS:000290252400015
J	Avendano, Miguel; Cantillanez, Marcela							Reestablishment of Choromytilus chorus (Molina, 1782) (Bivalvia: Mytilidae) in northern Chile						LATIN AMERICAN JOURNAL OF AQUATIC RESEARCH			39	2			390	396		10.3856/vol39-issue2-fulltext-20			2011	2011	Despite indications of its presence in past ages, until the end of the last century, no records showed Choromytilus chorus north of 23 degrees S. Certain changes related to coastal water masses in the zone could be responsible for the present lack or scarcity of this species in the coastal area. However, a decade ago, this species appeared in northern Chile in the context of fisheries. This study…						0	0	0	0	0718-560X		WOS:000297978800020
J	Cantillanez, Marcela; Avendano, Miguel; Rojo, Manuel; Olivares, Alberto							Reproductive and population parameters of Thais chocolata (Duclos, 1832) (Gastropoda, Thaididae) in La Rinconada marine reserve, Antofagasta, Chile						LATIN AMERICAN JOURNAL OF AQUATIC RESEARCH			39	3			499	511		10.3856/vol39-issue3-fulltext-10			2011	2011	Reproductive and population parameters of Thais chocolata that would contribute to the validation of the current extraction standards were obtained by performing a study in the protected area of La Rinconada Marine Reserve, Antofagasta, Chile, from December 2008 to January 2010. In terms of reproduction, the results revealed asynchronic gonad development in the population, with specimens in diffe…						0	0	0	0	0718-560X		WOS:000297979500010
J	Cooper, Daniel; McDermott, Susanne							Seasonal, Small-Scale Distribution of Atka Mackerel in the Aleutian Islands, Alaska, with Respect to Reproduction						MARINE AND COASTAL FISHERIES			3	1			10	20		10.1080/19425120.2011.558439			2011	2011	We investigated the spatial distribution of Atka mackerel Pleurogrammus monopterygius with respect to maturity stage at Seguam Pass in the Aleutian Islands as well as their spawning locations within trawlable areas at three small-scale (10-20-nautical mile or 18.5-37.0-km) sites. Histological methods were used to determine maturity stages, and male maturity stages are described for the first time…						1	0	1	1	1942-5120		WOS:000298874700002
J	Srinoparatwatana, C.; Hyndes, G.							Inconsistent benefits of a freshwater protected area for artisanal fisheries and biodiversity in a South-east Asian wetland						MARINE AND FRESHWATER RESEARCH			62	5			462	470		10.1071/MF10232			2011	2011	Spatial closure management is a strategy used throughout the world for a range of goals, including protecting aquatic biodiversity and promoting fish production. However, benefits of freshwater protected areas (FPAs) have seldom been assessed. The present study is, therefore, one of the few that has compared the abundances, biomass and size structure of fish species between a FPA and the adjacent…						0	0	0	0	1323-1650		WOS:000290965500005
J	Wiegand, Jessica; Hunter, Ewan; Dulvy, Nicholas K.							Are spatial closures better than size limits for halting the decline of the North Sea thornback ray, Raja clavata?						MARINE AND FRESHWATER RESEARCH			62	6			722	733		10.1071/MF10141			2011	2011	A key challenge of the ecosystem approach to fisheries management is to sustain viable populations of large-bodied less-productive vulnerable elasmobranchs that are the by-catch of fisheries that target more productive species. The North Sea population of the thornback ray (Raja clavata) is now mainly confined to the Thames Estuary and surrounding SW North Sea, which is subject to a flatfish traw…						4	0	4	4	1323-1650		WOS:000291995600022
J	Clua, E.; Buray, N.; Legendre, P.; Mourier, J.; Planes, S.				Johann, Mourier/B-4881-2012			Business partner or simple catch? The economic value of the sicklefin lemon shark in French Polynesia						MARINE AND FRESHWATER RESEARCH			62	6			764	770		10.1071/MF10163			2011	2011	Most arguments invoked so far by the scientific community in favour of shark conservation rely on the ecological importance of sharks, and have little impact on management policies. During a 57-month study, we were able to individually recognise 39 sicklefin lemon sharks that support a shark-feeding ecotourism activity in Moorea Island, French Polynesia. We calculated the direct global revenue ge…						3	0	3	3	1323-1650		WOS:000291995600026
J	Druon, Jean-Noel; Fromentin, Jean-Marc; Aulanier, Florian; Heikkonen, Jukka							Potential feeding and spawning habitats of Atlantic bluefin tuna in the Mediterranean Sea						MARINE ECOLOGY-PROGRESS SERIES			439				223	240		10.3354/meps09321			2011	2011	Atlantic bluefin tuna Thunnus thynnus (ABFT) is a fish of high market value which has recently become strongly overexploited, notably in the Mediterranean Sea. This area is an essential habitat for ABFT reproduction and growth. We present here an approach for deriving the daily mapping of potential ABFT feeding and spawning habitats based on satellite-derived sea surface temperature (SST) and chl…						2	0	1	2	0171-8630		WOS:000296068200018
J	van de Wolfshaar, K. E.; HilleRisLambers, R.; Gardmark, A.				van de Wolfshaar, Karen/B-7508-2008			Effect of habitat productivity and exploitation on populations with complex life cycles						MARINE ECOLOGY-PROGRESS SERIES			438				175	184		10.3354/meps09304			2011	2011	In this paper we study the consequences of habitat switching and the corresponding ontogenetic diet shifts between adult and juvenile life stages for harvesting and management of exploited populations using a consumer-resource model with stage-specific mortality. Specifically, we study how differences in stage-specific habitat productivity regulate exploited populations and affect yield. We show …						0	0	0	0	0171-8630		WOS:000295616000015
J	McClanahan, T. R.; Huntington, B. E.; Cokos, B.							Coral responses to macroalgal reduction and fisheries closure on Caribbean patch reefs						MARINE ECOLOGY-PROGRESS SERIES			437				89	102		10.3354/meps09285			2011	2011	To determine the effects of algal reduction and fisheries closure, a crossed experimental design was undertaken over a 516 d period on the remote patch reefs of Glover's Reef Atoll, Belize. We investigated (1) the effects on health, growth, and survivorship of 2 transplanted coral species, Porites asteroides and Siderastrea siderea, and (2) the changes in the benthic and fish communities. Algal r…						0	0	0	0	0171-8630		WOS:000295342600008
J	Green, Kristen M.; Starr, Richard M.				Bizzarro, Joseph/A-2988-2012			Movements of small adult black rockfish: implications for the design of MPAs						MARINE ECOLOGY-PROGRESS SERIES			436				219	230		10.3354/meps09263			2011	2011	Off the coast of central California, USA, small black rockfish Sebastes melanops (individuals below the length at 50% maturity) comprise a large percentage of the catch in recreational fisheries, yet little is known about the movements of these small fish. To better understand their movements, we implanted acoustic transmitters into 23 black rockfish (29 to 41 cm total length) in Carmel Bay, Cali…						1	0	1	1	0171-8630		WOS:000294619800016
J	Mora, Camilo; Sale, Peter F.							Ongoing global biodiversity loss and the need to move beyond protected areas: a review of the technical and practical shortcomings of protected areas on land and sea						MARINE ECOLOGY-PROGRESS SERIES			434				251	266		10.3354/meps09214			2011	2011	A leading strategy in international efforts to reverse ongoing losses in biodiversity is the use of protected areas. We use a broad range of data and a review of the literature to show that the effectiveness of existing, and the current pace of the establishment of new, protected areas will not be able to overcome current trends of loss of marine and terrestrial biodiversity. Despite local succes…						5	0	7	7	0171-8630		WOS:000293532900021
J	Diaz, David; Mallol, Sandra; Parma, Ana M.; Goni, Raquel							Decadal trend in lobster reproductive output from a temperate marine protected area						MARINE ECOLOGY-PROGRESS SERIES			433				149	157		10.3354/meps09182			2011	2011	Increased recruitment from eggs and larvae exported from marine protected areas (MPAs) is anticipated to produce much greater benefits for exploited populations than spillover of adults. However, resolving the link between local egg production and regional recruitment is beyond current research capabilities, and quantifying the contribution of the MPA to regional reproductive output is the first …						2	0	2	2	0171-8630		WOS:000292890400012
J	Farmer, Nicholas A.; Ault, Jerald S.							Grouper and snapper movements and habitat use in Dry Tortugas, Florida						MARINE ECOLOGY-PROGRESS SERIES			433				169	184		10.3354/meps09198			2011	2011	Home ranges, activity patterns, and habitat preferences in and around no-take marine reserves (NTMRs) were evaluated for 5 exploited snapper-grouper species in diverse coral reef habitats in the Dry Tortugas, Florida. Movements of ultrasonic tagged reef fish were determined using a calibrated array of omnidirectional hydroacoustic receivers. Average home range sizes were 2.09 +/- 0.39 km(2) (n = …						1	0	1	1	0171-8630		WOS:000292890400014
J	Hinz, H.; Tarrant, D.; Ridgeway, A.; Kaiser, M. J.; Hiddink, J. G.				Hiddink, Jan Geert/C-1238-2009			Effects of scallop dredging on temperate reef fauna						MARINE ECOLOGY-PROGRESS SERIES			432				91	102		10.3354/meps09166			2011	2011	Scallop dredging is considered to be one of the most destructive bottom fisheries, yet empirical field evidence to support this assertion, in particular for highly structured habitats, is limited. With this study, we investigated the effects of scallop dredging on the fauna of a temperate stony reef through a comparison of areas subject to different levels of fishing activity. Significant negativ…						0	0	0	0	0171-8630		WOS:000292163200008
J	Gonzalez-Zevallos, Diego; Yorio, Pablo; Svagelj, Walter S.							Seabird attendance and incidental mortality at shrimp fisheries in Golfo San Jorge, Argentina						MARINE ECOLOGY-PROGRESS SERIES			432				125	135		10.3354/meps09146			2011	2011	Many seabirds are attracted to trawl vessels to make use of fishery waste, and often this attraction results in increased incidental mortality. We assessed seabird attendance and associated incidental mortality at the Argentine red shrimp Pleoticus muelleri trawl fishery in Golfo San Jorge, Argentina. Information on seabird numbers was gathered in the autumn and winter 2006 and spring 2008, while…						2	0	1	2	0171-8630		WOS:000292163200011
J	Cook, Kylie; Vanderklift, Mathew A.				Vanderklift, Mathew/B-1003-2008			Depletion of predatory fish by fishing in a temperate reef ecosystem leads to indirect effects on prey, but not to lower trophic levels						MARINE ECOLOGY-PROGRESS SERIES			432				195	205		10.3354/meps09155			2011	2011	Indirect effects of fishing extending 2 or more trophic levels have been observed in a range of ecosystems, but they are not ubiquitously present, and identifying the circumstances in which they occur (or do not occur) is a key challenge for ecologists. We compared a fully protected sanctuary (no fishing allowed) with 2 other types of management zones (one in which all types of fishing were allow…						0	0	0	0	0171-8630		WOS:000292163200017
J	Karnauskas, Mandy; Huntington, Brittany E.; Babcock, Elizabeth A.; Lirman, Diego							Pre-existing spatial patterns in fish abundances influence species-specific responses in a Caribbean marine reserve						MARINE ECOLOGY-PROGRESS SERIES			432				235	246		10.3354/meps09151			2011	2011	No-take marine reserves have been used to promote biodiversity conservation and have increasingly been implemented with the goal of rebuilding depleted fish stocks. Yet, marine reserves may cause some species to decrease in abundance while others increase, in part because species are not equally impacted by the effort displaced from the reserve into surrounding fished areas. We evaluate temporal …						3	0	3	3	0171-8630		WOS:000292163200020
J	Palmer, M.; Balle, S.; March, D.; Alos, J.; Linde, M.							Size estimation of circular home range from fish mark-release-(single)-recapture data: case study of a small labrid targeted by recreational fishing						MARINE ECOLOGY-PROGRESS SERIES			430				87	U146		10.3354/meps09109			2011	2011	Contrary to common belief, empirical evidence shows that a number of marine littoral fish species tend to remain in a small geographic area. Despite the growing awareness about the consequences of reduced mobility (e. g. design of marine protected areas), an accurate description of fish movement is technically difficult; thus, it is usually not considered. Mark-release-(single)-recapture (MRsR) d…						5	0	5	5	0171-8630		WOS:000291826600007
J	Moland, Even; Olsen, Esben Moland; Knutsen, Halvor; Knutsen, Jan Atle; Enersen, Svein Erik; Andre, Carl; Stenseth, Nils Chr				Knutsen, Halvor/A-4261-2009; Olsen, Esben/B-1894-2012; Andre, Carl/B-4237-2010			Activity patterns of wild European lobster Homarus gammarus in coastal marine reserves: implications for future reserve design						MARINE ECOLOGY-PROGRESS SERIES			429				197	207		10.3354/meps09102			2011	2011	European lobster Homarus gammarus in Norway has been in decline over the last 30 to 40 yr, and the species is currently red listed according to International Union for Conservation of Nature criteria. In 2006, experimental lobster reserves were established in the coastal Skagerrak, southern Norway, allowing for studies in the absence of disturbance by fishing gear. We present behavioural data fro…						1	0	0	1	0171-8630		WOS:000290682100017
J	Aiken, Christopher M.; Navarrete, Sergio A.							Environmental fluctuations and asymmetrical dispersal: generalized stability theory for studying metapopulation persistence and marine protected areas						MARINE ECOLOGY-PROGRESS SERIES			428				77	88		10.3354/meps09079			2011	2011	Dispersal of individuals among subpopulations is a key process underlying metapopulation dynamics. Many metapopulation models, including those of coastal benthic organisms under marine reserve scenarios, have assumed a particular and time-independent dispersal pattern. The behavior of such models, however, may be sensitive to more realistic representations of oceanic dispersal. We examine the imp…						1	0	1	1	0171-8630		WOS:000290248800006
J	Alos, Josep; March, David; Palmer, Miquel; Grau, Amalia; Morales-Nin, Beatriz							Spatial and temporal patterns in Serranus cabrilla habitat use in the NW Mediterranean revealed by acoustic telemetry						MARINE ECOLOGY-PROGRESS SERIES			427				173	186		10.3354/meps09042			2011	2011	We used acoustic telemetry to describe the spatial and temporal patterns of habitat use of one of the species most targeted by recreational anglers in the NW Mediterranean, Serranus cabrilla (Linnaeus, 1758). Temporal patterns and fish position were determined using a fixed-receiver array located in a marine protected area (MPA) in Palma Bay (Balearic Islands). Fish position as centre of activity…						7	0	7	7	0171-8630		WOS:000289489800014
J	Shillinger, George L.; Swithenbank, Alan M.; Bailey, Helen; Bograd, Steven J.; Castelton, Michael R.; Wallace, Bryan P.; Spotila, James R.; Paladino, Frank V.; Piedra, Rotney; Block, Barbara A.				Bailey, Helen/E-6813-2012			Vertical and horizontal habitat preferences of post-nesting leatherback turtles in the South Pacific Ocean						MARINE ECOLOGY-PROGRESS SERIES			422				275	289		10.3354/meps08884			2011	2011	Leatherback turtles are the largest and widest ranging turtle species, and spend much of their time in the offshore pelagic environment. However, the high seas have thus far received little management attention to protect their ecosystems and biodiversity. We tagged 46 female leatherback turtles with satellite transmitters at Playa Grande, Costa Rica from 2004 to 2007. In the present study, we an…						5	0	5	5	0171-8630		WOS:000286933500025
J	McCrea-Strub, Ashley; Zeller, Dirk; Sumaila, Ussif Rashid; Nelson, Jay; Balmford, Andrew; Pauly, Daniel							Understanding the cost of establishing marine protected areas						MARINE POLICY			35	1			1	9					2012-01-11	2011	While the recurrent cost of managing marine protected areas (MPAs) has been documented and estimated, there has been virtually no attempt to quantify the cost of establishing MPAs in the first place. This lack of attention is likely the result of the complexity of the process, involving often uncoordinated efforts of a multitude of governmental and non-governmental entities over a protracted peri…						1	0	0	1	0308-597X		CCC:000283619600001
J	Liu, Xiao-Shou; Xu, Wen-Zhe; Cheung, S. G.; Shin, Paul K. S.							Response of meiofaunal community with special reference to nematodes upon deployment of artificial reefs and cessation of bottom trawling in subtropical waters, Hong Kong						MARINE POLLUTION BULLETIN			63	2012-05-12	SI		376	384		10.1016/j.marpolbul.2010.11.019			2011	2011	The response of meiofaunal communities, especially nematodes, upon the deployment of artificial reefs and cessation of bottom trawling at a designated Marine Protected Area (MPA) in Hong Kong was studied through comparison of meiofaunal samples collected inside and outside the MPA. Total organic carbon (TOC), total Kjeldahl nitrogen (TKN), total phosphorus (TP), water content and silt-clay fracti…						0	0	0	0	0025-326X		WOS:000294092700047
J	Clark, Malcolm R.; Watling, Les; Rowden, Ashley A.; Guinotte, John M.; Smith, Craig R.							A global seamount classification to aid the scientific design of marine protected area networks						OCEAN & COASTAL MANAGEMENT			54	1			19	36		10.1016/j.ocecoaman.2010.10.006			2012-01-11	2011	Seamounts are prominent features of the world's seafloor, and are the target of deep-sea commercial fisheries, and of interest for minerals exploitation. They can host vulnerable benthic communities, which can be rapidly and severely impacted by human activities. There have been recent calls to establish networks of marine protected areas on the High Seas, including seamounts. However, there is l…						5	0	4	5	0964-5691		WOS:000287072100003
J	Rosendo, Sergio; Brown, Katrina; Joubert, Alison; Jiddawi, Narriman; Mechisso, Micas							A clash of values and approaches: A case study of marine protected area planning in Mozambique						OCEAN & COASTAL MANAGEMENT			54	1			55	65		10.1016/j.ocecoaman.2010.10.009			2012-01-11	2011	Many developing countries are expanding their network of Marine Protected Areas (MPAs) to meet ambitious marine conservation targets set globally and to develop tourism nationally. This study explores the human dimensions of MPA planning in Mozambique by engaging local resource users in a series of structured discussions about marine resource use, pressures on marine resources, ways to address su…						2	0	0	2	0964-5691		WOS:000287072100006
J	Cabral, Reniel B.; Alino, Porfirio M.							Transition from common to private coasts: Consequences of privatization of the coastal commons						OCEAN & COASTAL MANAGEMENT			54	1			66	74		10.1016/j.ocecoaman.2010.10.023			2012-01-11	2011	Privatization is often viewed to provide positive stimulus for the economy that can lead to the betterment of society. But when the appropriate governance systems are not functionally in place, the unwanted effects of privatization can have deleterious consequences. This paper highlights the consequences of undesirable privatization and the emergent unwanted privatization tendencies of the coasta…						6	0	2	6	0964-5691		WOS:000287072100007
J	Jentoft, Svein; Chuenpagdee, Ratana; Pascual-Fernandez, Jose J.							What are MPAs for: On goal formation and displacement						OCEAN & COASTAL MANAGEMENT			54	1			75	83		10.1016/j.ocecoaman.2010.10.024			2012-01-11	2011	Marine Protected Areas (MPAs) are established for various purposes. Some are aimed at protection, some are intended as resource management tools, while others imply both of these objectives, as well as others. Regardless of the stated goals, the same MPA can mean different things to different people, and these meanings may be inconsistent. In practice, MPA goals are not always stated clearly, and…						5	0	2	5	0964-5691		WOS:000287072100008
J	Beliaeff, Benoit; Pelletier, Dominique				Pelletier, Dominique/A-1649-2011			A general framework for indicator design and use with application to the assessment of coastal water quality and marine protected area management						OCEAN & COASTAL MANAGEMENT			54	1			84	92		10.1016/j.ocecoaman.2010.10.037			2012-01-11	2011	Environmental management decisions based upon indicators are the end point of a process involving stakeholders and scientists. These steps should be explicit and follow a chronology. This paper presents a general framework for the design and use of management-oriented indicators, integrating management questions and performance criteria. We first examined the desirable characteristics of indicato…						4	0	1	4	0964-5691		WOS:000287072100009
S	Graham, Nicholas A. J.; Ainsworth, Tracy D.; Baird, Andrew H.; Ban, Natalie C.; Bay, Line K.; Cinner, Joshua E.; De Freitas, Debora M.; Diaz-Pulido, Guillermo; Dornelas, Maria; Dunn, Simon R.; Fidelman, Pedro I. J.; Foret, Sylvain; Good, Tatjana C.; Kool, Johnathan; Mallela, Jennie; Penin, Lucie; Pratchett, Morgan S.; Williamson, David H.				Baird, Andrew/C-8449-2009; Penin, Lucie/B-3163-2009; FORET, Sylvain/B-9207-2012; Ban, Natalie/C-6938-2009	Gibson, RN; Atkinson, RJA; Gordon, JDM		FROM MICROBES TO PEOPLE: TRACTABLE BENEFITS OF NO-TAKE AREAS FOR CORAL REEFS						OCEANOGRAPHY AND MARINE BIOLOGY: AN ANNUAL REVIEW, VOL 49	Oceanography and Marine Biology		49				105	135					2011	2011	The number of no-take marine protected areas (here referred to as no-take areas, NTAs) on coral reefs has increased considerably in recent decades. Coincident with accelerating degradation of coral reefs, expectations of the benefits that NTAs can provide for coastal societies and sustainability of marine ecosystems has grown. These include increasing abundance of reef organisms both inside and o…						3	0	3	3	0078-3218	978-1-4398-5364-1	WOS:000293419200003
S	Leis, Jeffrey M.; Van Herwerden, Lynne; Patterson, Heather M.				Leis, Jeffrey/E-7502-2012; van Herwerden, Lynne/I-1087-2012	Gibson, RN; Atkinson, RJA; Gordon, JDM		ESTIMATING CONNECTIVITY IN MARINE FISH POPULATIONS: WHAT WORKS BEST?						OCEANOGRAPHY AND MARINE BIOLOGY: AN ANNUAL REVIEW, VOL 49	Oceanography and Marine Biology		49				193	234					2011	2011	Measuring connectivity in marine populations is a key, yet poorly understood issue. The degree of connectivity determines the spatial scales over which population dynamics operate, the spatial scales over which fisheries should be managed and how marine protected areas should be designed and implemented. Thus, much research is directed towards a better understanding of connectivity. The tools cur…						1	0	1	1	0078-3218	978-1-4398-5364-1	WOS:000293419200005
J	Aburto-Oropeza, Octavio; Erisman, Brad; Galland, Grantly R; Mascarenas-Osorio, Ismael; Sala, Enric; Ezcurra, Exequiel							Large recovery of fish biomass in a no-take marine reserve.						PloS one			6	8			e23601	e23601					2011	2011	No-take marine reserves are effective management tools used to restore fish biomass and community structure in areas depleted by overfishing. Cabo Pulmo National Park (CPNP) was created in 1995 and is the only well enforced no-take area in the Gulf of California, Mexico, mostly because of widespread support from the local community. In 1999, four years after the establishment of the reserve, ther…						0	0	0	0	1932-6203		MEDLINE:21858183
J	Anadon, Jose Daniel; D'Agrosa, Caterina; Gondor, Anne; Gerber, Leah R							Quantifying the spatial ecology of wide-ranging marine species in the Gulf of California: implications for marine conservation planning.						PloS one			6	12			e28400	e28400					2011	2011	There is growing interest in systematic establishment of marine protected area (MPA) networks and representative conservation sites. This movement toward networks of no-take zones requires that reserves are deliberately and adequately spaced for connectivity. Here, we test the network functionality of an ecoregional assessment configuration of marine conservation areas by evaluating the habitat p…						0	0	0	0	1932-6203		MEDLINE:22163013
J	Davies, Andrew J; Guinotte, John M							Global habitat suitability for framework-forming cold-water corals.						PloS one			6	4			e18483	e18483					2011 Apr 15	2011	Predictive habitat models are increasingly being used by conservationists, researchers and governmental bodies to identify vulnerable ecosystems and species' distributions in areas that have not been sampled. However, in the deep sea, several limitations have restricted the widespread utilisation of this approach. These range from issues with the accuracy of species presences, the lack of reliabl…						0	0	0	0	1932-6203		MEDLINE:21525990
J	Grech, Alana; Sheppard, James; Marsh, Helene							Informing species conservation at multiple scales using data collected for marine mammal stock assessments.						PloS one			6	3			e17993	e17993					2011 Mar 28	2011	BACKGROUND: Conservation planning and the design of marine protected areas (MPAs) requires spatially explicit information on the distribution of ecological features. Most species of marine mammals range over large areas and across multiple planning regions. The spatial distributions of marine mammals are difficult to predict using habitat modelling at ecological scales because of insufficient und…						0	0	0	0	1932-6203		MEDLINE:21464933
J	Gruss, Arnaud; Kaplan, David M; Hart, Deborah R							Relative impacts of adult movement, larval dispersal and harvester movement on the effectiveness of reserve networks.						PloS one			6	5			e19960	e19960					2011	2011	Movement of individuals is a critical factor determining the effectiveness of reserve networks. Marine reserves have historically been used for the management of species that are sedentary as adults, and, therefore, larval dispersal has been a major focus of marine-reserve research. The push to use marine reserves for managing pelagic and demersal species poses significant questions regarding the…						0	0	0	0	1932-6203		MEDLINE:21611148
J	Pittman, Simon J; Brown, Kerry A							Multi-scale approach for predicting fish species distributions across coral reef seascapes.						PloS one			6	5			e20583	e20583					2011	2011	Two of the major limitations to effective management of coral reef ecosystems are a lack of information on the spatial distribution of marine species and a paucity of data on the interacting environmental variables that drive distributional patterns. Advances in marine remote sensing, together with the novel integration of landscape ecology and advanced niche modelling techniques provide an unpre…						0	0	0	0	1932-6203		MEDLINE:21637787
J	Rocklin, Delphine; Tomasini, Jean-Antoine; Culioli, Jean-Michel; Pelletier, Dominique; Mouillot, David							Spearfishing regulation benefits artisanal fisheries: the ReGS indicator and its application to a multiple-use Mediterranean marine protected area.						PloS one			6	9			e23820	e23820					2011	2011	The development of fishing efficiency coupled with an increase of fishing effort led to the overexploitation of numerous natural marine resources. In addition to this commercial pressure, the impact of recreational activities on fish assemblages remains barely known. Here we examined the impact of spearfishing limitation on resources in a marine protected area (MPA) and the benefit it provides fo…						0	0	0	0	1932-6203		MEDLINE:21966357
J	Heyman, William D.; Wright, Dawn J.							Marine Geomorphology in the Design of Marine Reserve Networks						PROFESSIONAL GEOGRAPHER			63	4			429	442					2011	2011	Marine environments, key life-support systems for the earth, are under severe threat. Issues associated with managing these common property resources are complex and interrelated. Networks of marine reserves can be valuable for mitigating threats to marine systems, yet the successful design and implementation of such networks has been limited. Efficient ways to conserve marine environments are ur…						0	0	0	0	0033-0124		CCC:000299413200003
J	Coleman, Felicia C.; Scanlon, Kathryn M.; Koenig, Christopher C.							Groupers on the Edge: Shelf Edge Spawning Habitat in and Around Marine Reserves of the Northeastern Gulf of Mexico						PROFESSIONAL GEOGRAPHER			63	4			456	474					2011	2011	The northeastern Gulf of Mexico contains some of the most diverse and productive marine habitat in the United States. Much of this habitat, located on the shelf edge in depths of 50 to 120 m, supports spawning for many economically important species, including groupers. Here, we couple acoustic surveys with georeferenced videography to describe the primary spatial and geologic features of spawnin…						0	0	0	0	0033-0124		CCC:000299413200005
J	Fischer, Douglas T.; White, J. Wilson; Botsford, Louis W.; Largier, John; Kaplan, David M.				Fischer, Douglas/A-3022-2008			A GIS-Based Tool for Representing Larval Dispersal for Marine Reserve Selection						PROFESSIONAL GEOGRAPHER			63	4			489	513					2011	2011	Increasing efforts to implement marine protected areas (MPAs) as a means of managing marine ecosystems have created a need for evaluating potential spatial management plans. Almost all marine populations are metapopulations, connected reproductively by the dispersal of pelagic larvae. Models of marine population dynamics must account for larval connectivity, but despite recent advances connectivi…						0	0	0	0	0033-0124		CCC:000299413200007
J	Vincent, I. V.; Hincksman, C. M.; Tibbetts, I. R.; Harris, A.							Biomass and Abundance of Herbivorous Fishes on Coral Reefs off Andavadoaka, Western Madagascar						Western Indian Ocean Journal of Marine Science			10	1			83	98					JAN-JUN 2011	2011	The biomass and abundance of four herbivorous fish families were surveyed in the region of Andavadoaka, south-west Madagascar, investigating the effects of fishing intensity, reef geomorphology and benthic cover. Distance from the village was used as a proxy for fishing effort, with sites closest to the village assumed to have the highest fishing intensity. Both overall herbivore biomass and abun…						0	0	0	0	0856-860X		BIOSIS:PREV201200271955
J	Vermeij, Mark J. A.; van Moorselaar, Imke; Engelhard, Sarah; Hornlein, Christine; Vonk, Sophie M.; Visser, Petra M.							The Effects of Nutrient Enrichment and Herbivore Abundance on the Ability of Turf Algae to Overgrow Coral in the Caribbean						PLOS ONE			5	12					e14312	10.1371/journal.pone.0014312			DEC 13 2010	2010	Turf algae are multispecies communities of small marine macrophytes that are becoming a dominant component of coral reef communities around the world. To assess the impact of turf algae on corals, we investigated the effects of increased nutrients (eutrophication) on the interaction between the Caribbean coral Montastraea annularis and turf algae at their growth boundary. We also assessed whether…						4	0	4	4	1932-6203		WOS:000285246900017
J	Madin, Elizabeth M. P.; Gaines, Steven D.; Madin, Joshua S.; Warner, Robert R.				Madin, Joshua/C-9903-2010			Fishing Indirectly Structures Macroalgal Assemblages by Altering Herbivore Behavior						AMERICAN NATURALIST			176	6			785	801		10.1086/657039			2012-12-10	2010	Fishing has clear direct effects on harvested species, but its cascading, indirect effects are less well understood. Fishing disproportionately removes larger, predatory fishes from marine food webs. Most studies of the consequent indirect effects focus on density-mediated interactions where predator removal alternately drives increases and decreases in abundances of successively lower trophic-le…						4	0	4	4	0003-0147		WOS:000283743800012
J	White, J. Wilson; Rogers-Bennett, Laura							INCORPORATING PHYSICAL OCEANOGRAPHIC PROXIES OF RECRUITMENT INTO POPULATION MODELS TO IMPROVE FISHERY AND MARINE PROTECTED AREA MANAGEMENT						CALIFORNIA COOPERATIVE OCEANIC FISHERIES INVESTIGATIONS REPORTS			51				128	149					2012-12-10	2010	Variability in larval supply introduces uncertainty into the management of marine fisheries. This variability can confound short-term population projections of both traditional and spatially explicit models of fishery productivity. A potential remedy is the use of physical oceanographic variables, such as an upwelling index or the Pacific Decadal Oscillation, as proxies for recruitment year class…						1	0	0	1	0575-3317		WOS:000208407900008
J	Kaplan, Isaac C.; Levin, Phillip S.; Burden, Merrick; Fulton, Elizabeth A.				Thomas, Jan/F-8817-2010; Fulton, Elizabeth/A-2871-2008			Fishing catch shares in the face of global change: a framework for integrating cumulative impacts and single species management						CANADIAN JOURNAL OF FISHERIES AND AQUATIC SCIENCES			67	12			1968	1982		10.1139/F10-118			2012-12-10	2010	Any fishery management scheme, such as individual fishing quotas (IFQs) or marine protected areas, should be designed to be robust to potential shifts in the biophysical system. Here we couple possible catch scenarios under an IFQ scheme with ocean acidification impacts on shelled benthos and plankton, using an Atlantis ecosystem model for the US West Coast. IFQ harvest scenarios alone, in most c…						5	0	3	5	0706-652X		WOS:000285555200007
J	McClanahan, Timothy R.							Effects of Fisheries Closures and Gear Restrictions on Fishing Income in a Kenyan Coral Reef						CONSERVATION BIOLOGY			24	6			1519	1528		10.1111/j.1523-1739.2010.01530.x			2012-12-10	2010	The adoption of fisheries closures and gear restrictions in the conservation of coral reefs may be limited by poor understanding of the economic profitability of competing economic uses of marine resources. Over the past 12 years, I evaluated the effects of gear regulation and fisheries closures on per person and per area incomes from fishing in coral reefs of Kenya. In two of my study areas, the…						16	0	12	16	0888-8892		WOS:000284172800011
J	Munguia-Vega, A.; Soria, G.; Pfister, T.; Cudney-Bueno, R.							Isolation and characterization of microsatellite loci in the rock scallop (Spondylus calcifer) (Bivalvia: Spondylidae) from the Northern Gulf California, Mexico						CONSERVATION GENETICS RESOURCES			2	1			51	54		10.1007/s12686-009-9141-5			2012-12-10	2010	Twelve microsatellite loci were isolated from an enriched genomic library of the rock scallop (Spondylus calcifer). One locus was monomorphic. Overall polymorphic loci, the mean numbers of alleles per locus at one locality was 9.6 (range 3-16), and the average observed and expected heterozygosities were 0.650 and 0.707, respectively. Three loci deviated from Hardy-Weinberg equilibrium, and from t…						2	0	2	2	1877-7252		WOS:000290409000011
J	Weeks, Rebecca; Russ, Garry R.; Bucol, Abner A.; Alcala, Angel C.							Incorporating local tenure in the systematic design of marine protected area networks						CONSERVATION LETTERS			3	6			445	453		10.1111/j.1755-263X.2010.00131.x			2012-12-10	2010	Although the importance of socioeconomic factors in conservation planning is increasingly recognized, there are few examples demonstrating how such factors can be practically incorporated into the design of protected area networks. Here, we illustrate how spatial zoning software can be used to consider local marine tenure explicitly in the design of marine protected area (MPA) networks, using a c…						1	0	1	1	1755-263X		WOS:000284893700009
J	Parnell, P. Ed; Dayton, Paul K.; Fisher, Rachelle A.; Loarie, Cina C.; Darrow, Ryan D.							Spatial patterns of fishing effort off San Diego: implications for zonal management and ecosystem function						ECOLOGICAL APPLICATIONS			20	8			2203	2222		10.1890/09-1543.1			2012-12-10	2010	The essence of ecosystem-based management is managing human practices to conserve the ecosystem. Ecologists focus on understanding the ecosystem, but there are fundamental information gaps including patterns of human exploitation. In particular, the spatial distribution of fishing effort must be known at the scales needed for ecologically relevant management. Fishing is a primary impact on coasta…						5	0	4	6	1051-0761		WOS:000284996600012
J	Madin, Elizabeth M. P.; Gaines, Steven D.; Warner, Robert R.							Field evidence for pervasive indirect effects of fishing on prey foraging behavior						ECOLOGY			91	12			3563	3571		10.1890/09-2174.1			2012-12-10	2010	The indirect, ecosystem-level consequences of ocean fishing, and particularly the mechanisms driving them, are poorly understood. Most studies focus on density-mediated trophic cascades, where removal of predators alternately causes increases and decreases in abundances of lower trophic levels. However, cascades could also be driven by where and when prey forage rather than solely by prey abundan…						17	0	17	17	1958-12-01		WOS:000285635100018
J	O'Leary, Jennifer K.; McClanahan, Timothy R.							Trophic cascades result in large-scale coralline algae loss through differential grazer effects						ECOLOGY			91	12			3584	3597		10.1890/09-2059.1			2012-12-10	2010	Removal of predators can have strong indirect effects on primary producers through trophic cascades. Crustose coralline algae (CCA) are major primary producers worldwide that may be influenced by predator removal through changes in grazer composition and biomass. CCA have been most widely studied in Caribbean and temperate reefs, where cover increases with increasing grazer biomass due to removal…						9	0	9	9	1958-12-01		WOS:000285635100020
J	Sponaugle, Su							Otolith microstructure reveals ecological and oceanographic processes important to ecosystem-based management						ENVIRONMENTAL BIOLOGY OF FISHES			89	2012-03-04			221	238		10.1007/s10641-010-9676-z			2012-12-10	2010	Information obtained from fish otoliths has been a critical component of fisheries management for decades. The nature of this information has changed over time as management goals and approaches have shifted. The earliest and still most pervasively used data are those of annual age and growth used to calculate the demographic rates of populations in single-species management strategies. Over time…		4th International Otolith Symposium	AUG 24-28, 2009		Monterey, CA	1	0	1	1	0378-1909		WOS:000284976500003
J	Barnett-Johnson, Rachel; Teel, David J.; Casillas, Edmundo				Thomas, Jan/F-8817-2010			Genetic and otolith isotopic markers identify salmon populations in the Columbia River at broad and fine geographic scales						ENVIRONMENTAL BIOLOGY OF FISHES			89	2012-03-04			533	546		10.1007/s10641-010-9662-5			2012-12-10	2010	Processes occurring in freshwater, estuarine, and marine habitats strongly influence the growth, survival and reproductive success of salmonids. Nonetheless, implementing an ecosystem model explicitly linking these important habitats has been hindered by the inability to track the source identity of individuals where they co-occur. Here we explore the development and integration of natural marker…		4th International Otolith Symposium	AUG 24-28, 2009		Monterey, CA	3	1	3	4	0378-1909		WOS:000284976500029
J	Sethi, Suresh A.							Risk management for fisheries						FISH AND FISHERIES			11	4			341	365		10.1111/j.1467-2979.2010.00363.x			2012-12-10	2010	Risk management methods provide means to address increasing complexity for successful fisheries management by systematically identifying and coping with risk. The objective of this study is to summarize risk management practices in use in fisheries and to present strategies that are not currently used but may be applicable. Available tools originate from a variety of disciplines and are as divers…						3	0	2	3	1467-2960		WOS:000283708400002
J	Bevacqua, Daniele; Melia, Paco; Follesa, Maria C.; De Leo, Giulio A.; Gatto, Marino; Cau, Angelo				Bevacqua, Daniele/D-9421-2012; Gatto, Marino/D-9531-2012; Melia, Paco/E-8844-2012			Body growth and mortality of the spiny lobster Palinurus elephas within and outside a small marine protected area						FISHERIES RESEARCH			106	3			543	549		10.1016/j.fishres.2010.10.008			2012-12-10	2010	Following the establishment of a small marine protected area (MPA) located off western Sardinia (Mediterranean Sea) a long-term survey was conducted on a spiny lobster (Palinurus elephas) population inhabiting the MPA and adjacent fishing grounds Between 1998 and 2005 median carapace length increased by 1 9 mm year(-1) both within and outside the MPA On the contrary body size dispersion (IQR) inc…						2	0	2	2	0165-7836		WOS:000285077100033
J	Lasram, Frida Ben Rais; Guilhaumon, Francois; Albouy, Camille; Somot, Samuel; Thuiller, Wilfried; Mouillot, David				Guilhaumon, Francois/C-3240-2009; THUILLER, Wilfried/G-3283-2010; albouy, camille/H-9317-2012			The Mediterranean Sea as a 'cul-de-sac' for endemic fishes facing climate change						GLOBAL CHANGE BIOLOGY			16	12			3233	3245		10.1111/j.1365-2486.2010.02224.x			2012-12-10	2010	The Mediterranean Sea is a hotspot of biodiversity, and climate warming is expected to have a significant influence on its endemic fish species. However, no previous studies have predicted whether fish species will experience geographic range extensions or contractions as a consequence of warming. Here, we projected the potential future climatic niches of 75 Mediterranean Sea endemic fish species…						13	0	12	13	1354-1013		WOS:000283726600007
J	Martins, Gustavo M.; Thompson, Richard C.; Neto, Ana I.; Hawkins, Stephen J.; Jenkins, Stuart R.				Martins, Gustavo/A-8857-2008; Jenkins, Stuart/D-2032-2010; Neto, Ana/C-1505-2010			Exploitation of intertidal grazers as a driver of community divergence						JOURNAL OF APPLIED ECOLOGY			47	6			1282	1289		10.1111/j.1365-2664.2010.01876.x			2012-12-10	2010	1. The possibility that different assemblages of species may represent alternative stable states has been the subject of much theoretical and empirical work. Alternative stable states may in theory arise from a perturbation of sufficient magnitude that pushes an assemblage from one stable equilibrium point to another. Overfishing is one such disturbance that can lead to cascading community-level …						1	0	1	1	0021-8901		WOS:000283983200015
J	Giacalone, V. M.; D'Anna, G.; Badalamenti, F.; Pipitone, C.							Weight-length relationships and condition factor trends for thirty-eight fish species in trawled and untrawled areas off the coast of northern Sicily (central Mediterranean Sea)						JOURNAL OF APPLIED ICHTHYOLOGY			26	6			954	957		10.1111/j.1439-0426.2010.01491.x			2012-12-10	2010	This paper reports the weight-length relationship (WLR) for thirty-eight fish species from the Gulf of Castellammare (NW Sicily, Mediterranean Sea). A total of 59 870 fish were collected and measured during four seasonal trawl surveys carried out in 2005 at 10 to 200 m depth. The b parameter of the WLRs ranged from 1.79 (Cepola macrophthalma) to 3.56 (Conger conger). Significant differences in bo…						1	0	1	1	0175-8659		WOS:000284171500024
J	Pinheiro, Hudson Tercio; Joyeux, Jean-Christophe; Martins, Agnaldo Silva				Martins, Agnaldo/F-1615-2011			Reef Fisheries and Underwater Surveys Indicate Overfishing of a Brazilian Coastal Island						NATUREZA & CONSERVACAO			8	2			151	159		10.4322/natcon.00802008			2012-12-10	2010	The preoccupation about fishing effects on marine ecosystems has increased sharply over the last three decades. However, little is known about the impact of multi-gear artisanal and recreational fisheries on the structure of local reef fish communities in Brazil. Fishing activities around a Brazilian coastal island were monitored while reef fish density was censused during underwater surveys (UVC…						0	0	0	0	1679-0073		WOS:000285896500008
J	Tessier, A.; Poisot, T.; Romans, P.; Desdevises, Y.				Desdevises, Yves/D-5528-2011; Poisot, Timothee/B-2245-2010			PUTATIVE EFFECTS OF RECREATIONAL FISHING OF PARACENTROTUS LIVIDUS ON POPULATIONS OF SEA URCHINS IN MEDITERRANEAN SHALLOW WATER						VIE ET MILIEU-LIFE AND ENVIRONMENT			60	4			299	305					2012-12-10	2010	The goal of this study was to assess the impact of recreational harvesting on the populations of two sea urchin species, Paracentrotus lividus and Arbacia lixula, via their population densities and mean individual size at three sites in shallow water in the Gulf of Lion (NW Mediterranean Sea) characterised by different anthropogenic pressures. We observed a positive relationship between mean size…						1	0	0	1	0240-8759		WOS:000291515300003
J	Eddy, Tyler D.; Gardner, Jonathan P. A.; Perez-Matus, Alejandro							Applying Fishers' Ecological Knowledge to Construct Past and Future Lobster Stocks in the Juan Fernandez Archipelago, Chile						PLOS ONE			5	11					e13670	10.1371/journal.pone.0013670			NOV 5 2010	2010	Over-exploited fisheries are a common feature of the modern world and a range of solutions including area closures (marine reserves; MRs), effort reduction, gear changes, ecosystem-based management, incentives and co-management have been suggested as techniques to rebuild over-fished populations. Historic accounts of lobster (Jasus frontalis) on the Chilean Juan Fernandez Archipelago indicate a h…						2	0	2	2	1932-6203		WOS:000283839100003
J	Lirman, D.; Bowden-Kerby, A.; Schopmeyer, S.; Huntington, B.; Thyberg, T.; Gough, M.; Gough, T.; Gough, R.; Gough, Y.							A window to the past: documenting the status of one of the last remaining 'megapopulations' of the threatened staghorn coral Acropora cervicornis in the Dominican Republic						AQUATIC CONSERVATION-MARINE AND FRESHWATER ECOSYSTEMS			20	7			773	781		10.1002/aqc.1146			NOV-DEC 2010	2010	1. Acropora cervicornis (staghorn coral) and Acropora palmata (elkhorn coral), once common features of shallow Caribbean reefs observed growing as large stands or thickets, are now found mainly as remnant pockets or isolated colonies at a fraction of their historical areal extent.2. In February 2010, a large, surviving population of A. cervicornis was surveyed at Cabezos del Cayo, Punta Rusia, Do…						2	0	2	2	1052-7613		WOS:000284035300009
J	Parravicini, Valeriano; Thrush, Simon F.; Chiantore, Mariachiara; Morri, Carla; Croci, Camilla; Bianchi, Carlo Nike				Parravicini, Valeriano/A-8539-2011			The legacy of past disturbance: Chronic angling impairs long-term recovery of marine epibenthic communities from acute date-mussel harvesting						BIOLOGICAL CONSERVATION			143	11			2435	2440		10.1016/j.biocon.2010.06.006			2012-11-10	2010	Two major concerns affect the way we perceive impacts: first, no ecosystem can still be considered pristine and second, stressors may interact. Untangling the effects of broad-scale anthropogenic stressors is complicated as appropriate unimpacted areas at relevant scales are usually unavailable for contrast with impacted regions. Although the perfect study design in the traditions of small-scale …						4	0	3	4	2012-06-07		WOS:000283412300003
J	Knittweis, Leyla; Wolff, Matthias							Live coral trade impacts on the mushroom coral Heliofungia actiniformis in Indonesia: Potential future management approaches						BIOLOGICAL CONSERVATION			143	11			2722	2729		10.1016/j.biocon.2010.07.019			2012-11-10	2010	The poorly regulated aquarium trade in live corals poses yet another threat to fragile coral reef ecosystems. The Indonesian authorities routinely allocate some of the highest trade quotas in South Sulawesi to Heliofungia actiniformis despite a lack of data on the impacts of current collection practices on this species. Semi-structured interviews with fishermen and in situ surveys revealed a size…						1	0	1	1	2012-06-07		WOS:000283412300035
J	Turgeon, Katrine; Robillard, Audrey; Gregoire, Jacinthe; Duclos, Vanessa; Kramer, Donald L.				Kramer, Donald/E-9058-2011			Functional connectivity from a reef fish perspective: behavioral tactics for moving in a fragmented landscape						ECOLOGY			91	11			3332	3342		10.1890/09-2015.1			2012-11-10	2010	Functional connectivity, the degree to which the landscape facilitates or impedes movement, depends on how animals perceive costs and benefits associated with habitat features and integrate them into a movement path. There have been few studies on functional connectivity in marine organisms, despite its importance for the effectiveness of Marine Protected Areas. In this study, we asked how open s…						3	0	3	3	1958-12-01		WOS:000284158600022
J	Sen, Sevaly							Developing a framework for displaced fishing effort programs in marine protected areas						MARINE POLICY			34	6			1171	1177					2012-11-10	2010	As marine protected areas (MPAs) continue to be established, measures to address displaced effort are likely to become increasingly relevant. Recent experiences of displaced fishing effort programs for MPAs and recreational fishing reserves in Australia, together with two examples from the United States, are described. A practical framework for addressing displaced fishing effort is developed, wh…						1	0	1	1	0308-597X		CCC:000281173600007
J	Flaaten, Ola							Fisheries rent creation and distribution-the imaginary case of Codland						MARINE POLICY			34	6			1268	1272					2012-11-10	2010	This paper discusses actual and possible achievements and failures of Codland and examines it from the point of view of efficiency and in terms of distribution. Joint analysis of the two approaches is needed when contemplating fisheries management reforms, since such reforms may create both winners and losers. The analysis demonstrates how rent drain from fishing communities and countries may occ…						2	0	1	2	0308-597X		CCC:000281173600018
J	Yagi, Nobuyuki; Takagi, Akira P.; Takada, Yukiko; Kurokura, Hisashi							Marine protected areas in Japan: Institutional background and management framework						MARINE POLICY			34	6			1300	1306					2012-11-10	2010	Information on the location and area for all MPAs in Japan was collected through a comprehensive survey targeting government officials and local stakeholders. It was verified that at least 1161 MPAs exist in Japan. Of these, 1055 are implemented in conjunction with fishery regulations in the form of no-take zones. More than 30% of the individual MPAs in Japan were established by self-imposed inst…						4	0	2	4	0308-597X		CCC:000281173600022
J	Sheppard, Charles							Marine protected areas and pelagic fishing: The case of the Chagos Archipelago						MARINE POLLUTION BULLETIN			60	11			1899	1901		10.1016/j.marpolbul.2010.08.023			2012-11-10	2010							0	0	0	0	0025-326X		WOS:000284662800001
J	Koldewey, Heather J.; Curnick, David; Harding, Simon; Harrison, Lucy R.; Gollock, Matthew				Harrison, Lucy/F-9494-2011			Potential benefits to fisheries and biodiversity of the Chagos Archipelago/British Indian Ocean Territory as a no-take marine reserve						MARINE POLLUTION BULLETIN			60	11			1906	1915		10.1016/j.marpolbul.2010.10.002			2012-11-10	2010	On 1st April 2010, the British Government announced designation of the British Indian Ocean Territory or Chagos Archipelago - as the world's largest marine protected area (MPA). This near pristine ocean ecosystem now represents 16% of the worlds fully protected coral reef, 60% of the world's no-take protected areas and an uncontaminated reference site for ecological studies. In addition these gai…						5	0	4	5	0025-326X		WOS:000284662800012
J	Cognetti, Giuseppe; Maltagliati, Ferruccio							Ecosystem service provision: An operational way for marine biodiversity conservation and management						MARINE POLLUTION BULLETIN			60	11			1916	1923		10.1016/j.marpolbul.2010.09.017			2012-11-10	2010	Since no extensive conceptual framework has been developed on the issues of ecosystem service (ES) and service provider (SP) in the marine environment, we have made an attempt to apply these to the conservation and management of marine biodiversity. Within this context, an accurate individuation of SPs, namely the biological component of a given ecosystem that supports human activities is fundame…						2	0	2	2	0025-326X		WOS:000284662800013
J	Dalton, Tracey; Jin, Di							Extent and frequency of vessel oil spills in US marine protected areas						MARINE POLLUTION BULLETIN			60	11			1939	1945		10.1016/j.marpolbul.2010.07.036			2012-11-10	2010	Little is known about how marine protected areas (MPAs) may be vulnerable to vessel oil spills in the United States. This study investigated individual size, frequency, and total amount of vessel oil spilled in US MPAs, and how characteristics of MPAs and individual spill events influenced spills. Vessel oil spills in US waters (2002-06) and MPA boundaries were mapped. Total number and volume of …						4	0	2	4	0025-326X		WOS:000284662800016
J	Punt, Maarten J.; Weikard, Hans-Peter; Groeneveld, Rolf A.; Van Ierland, Ekko C.; Stel, Jan H.				Groeneveld, Rolf/B-3119-2010			PLANNING MARINE PROTECTED AREAS: A MULTIPLE USE GAME						NATURAL RESOURCE MODELING			23	4			610	646		10.1111/j.1939-7445.2010.00076.x			2012-11-10	2010	P>The EU Marine Strategy Directive (MSD) has a regional focus in its implementation. The directive obliges countries to take multiple uses and the marine strategies of neighboring countries into account when formulating marine strategies and when designating marine protected areas (MPAs). We use game theoretical analysis both to find the optimal size of MPAs with multiple uses by multiple countri…						1	0	0	1	0890-8575		WOS:000283322700008
J	de Juan, S.; Lleonart, J.				Lleonart, Jordi/F-1205-2011			A conceptual framework for the protection of vulnerable habitats impacted by fishing activities in the Mediterranean high seas						OCEAN & COASTAL MANAGEMENT			53	11			717	723		10.1016/j.ocecoaman.2010.10.005			2012-11-10	2010	This work aims to compile knowledge on ecologically rich habitats that deserve special protection in the Mediterranean high seas. Many marine ecosystems are currently threatened by fishing activities, such as bottom trawling, gillnets and demersal and pelagic long-lines. Especially vulnerable are areas described as either sensitive habitats or essential fish habitats. Among these we highlight the…						4	0	3	4	0964-5691		WOS:000285036800008
J	Gaines, Steven D.; Lester, Sarah E.; Grorud-Colvert, Kirsten; Costello, Christopher; Pollnac, Richard							Evolving science of marine reserves: New developments and emerging research frontiers						PROCEEDINGS OF THE NATIONAL ACADEMY OF SCIENCES OF THE UNITED STATES OF AMERICA			107	43			18251	18255		10.1073/pnas.1002098107			OCT 26 2010	2010	The field of marine reserve science has matured greatly over the last decade, moving beyond studies of single reserves and beyond perspectives from single disciplines. This Special Feature exemplifies recent advances in marine reserve research, showing insights gained from synthetic studies of reserve networks, long-term changes within reserves, integration of social and ecological science resear…						10	0	7	10	0027-8424		WOS:000283677400009
J	Babcock, R. C.; Shears, N. T.; Alcala, A. C.; Barrett, N. S.; Edgar, G. J.; Lafferty, K. D.; McClanahan, T. R.; Russ, G. R.				Babcock, Russell/A-3794-2012			Decadal trends in marine reserves reveal differential rates of change in direct and indirect effects						PROCEEDINGS OF THE NATIONAL ACADEMY OF SCIENCES OF THE UNITED STATES OF AMERICA			107	43			18256	18261		10.1073/pnas.0908012107			OCT 26 2010	2010	Decadal-scale observations of marine reserves suggest that indirect effects on taxa that occur through cascading trophic interactions take longer to develop than direct effects on target species. Combining and analyzing a unique set of long-term time series of ecologic data in and out of fisheries closures from disparate regions, we found that the time to initial detection of direct effects on ta…						32	0	31	34	0027-8424		WOS:000283677400010
J	Pelc, R. A.; Warner, R. R.; Gaines, S. D.; Paris, C. B.							Detecting larval export from marine reserves						PROCEEDINGS OF THE NATIONAL ACADEMY OF SCIENCES OF THE UNITED STATES OF AMERICA			107	43			18266	18271		10.1073/pnas.0907368107			OCT 26 2010	2010	Marine reserve theory suggests that where large, productive populations are protected within no-take marine reserves, fished areas outside reserves will benefit through the spillover of larvae produced in the reserves. However, empirical evidence for larval export has been sparse. Here we use a simple idealized coastline model to estimate the expected magnitude and spatial scale of larval export …						16	0	15	16	0027-8424		WOS:000283677400012
J	Hamilton, Scott L.; Caselle, Jennifer E.; Malone, Dan P.; Carr, Mark H.							Incorporating biogeography into evaluations of the Channel Islands marine reserve network						PROCEEDINGS OF THE NATIONAL ACADEMY OF SCIENCES OF THE UNITED STATES OF AMERICA			107	43			18272	18277		10.1073/pnas.0908091107			OCT 26 2010	2010	Networks of marine reserves are increasingly a major component of many ecosystem-based management plans designed to conserve biodiversity, protect the structure and function of ecosystems, and rebuild and sustain fisheries. There is a growing need for scientific guidance in the design of network-wide monitoring programs to evaluate the efficacy of reserves at meeting their conservation and manage…						13	0	9	13	0027-8424		WOS:000283677400013
J	McCook, Laurence J.; Ayling, Tony; Cappo, Mike; Choat, J. Howard; Evans, Richard D.; De Freitas, Debora M.; Heupel, Michelle; Hughes, Terry P.; Jones, Geoffrey P.; Mapstone, Bruce; Marsh, Helene; Mills, Morena; Molloy, Fergus J.; Pitcher, C. Roland; Pressey, Robert L.; Russ, Garry R.; Sutton, Stephen; Sweatman, Hugh; Tobin, Renae; Wachenfeld, David R.; Williamson, David H.				Mapstone, Bruce/C-6683-2011; jones, geoffrey/E-9306-2010; De Freitas, Debora/E-7561-2011; Pitcher, C. Roland/A-2368-2012; Tobin, Renae/B-4677-2012			Adaptive management of the Great Barrier Reef: A globally significant demonstration of the benefits of networks of marine reserves						PROCEEDINGS OF THE NATIONAL ACADEMY OF SCIENCES OF THE UNITED STATES OF AMERICA			107	43			18278	18285		10.1073/pnas.0909335107			OCT 26 2010	2010	The Great Barrier Reef (GBR) provides a globally significant demonstration of the effectiveness of large-scale networks of marine reserves in contributing to integrated, adaptive management. Comprehensive review of available evidence shows major, rapid benefits of no-take areas for targeted fish and sharks, in both reef and nonreef habitats, with potential benefits for fisheries as well as biodiv…						32	0	24	32	0027-8424		WOS:000283677400014
J	Gaines, Steven D.; White, Crow; Carr, Mark H.; Palumbi, Stephen R.							Designing marine reserve networks for both conservation and fisheries management						PROCEEDINGS OF THE NATIONAL ACADEMY OF SCIENCES OF THE UNITED STATES OF AMERICA			107	43			18286	18293		10.1073/pnas.0906473107			OCT 26 2010	2010	Marine protected areas (MPAs) that exclude fishing have been shown repeatedly to enhance the abundance, size, and diversity of species. These benefits, however, mean little to most marine species, because individual protected areas typically are small. To meet the larger-scale conservation challenges facing ocean ecosystems, several nations are expanding the benefits of individual protected areas…						38	0	30	38	0027-8424		WOS:000283677400015
J	Costello, Christopher; Rassweiler, Andrew; Siegel, David; De Leo, Giulio; Micheli, Fiorenza; Rosenberg, Andrew							The value of spatial information in MPA network design						PROCEEDINGS OF THE NATIONAL ACADEMY OF SCIENCES OF THE UNITED STATES OF AMERICA			107	43			18294	18299		10.1073/pnas.0908057107			OCT 26 2010	2010	The science of spatial fisheries management, which combines ecology, oceanography, and economics, has matured significantly. As a result, there have been recent advances in exploiting spatially explicit data to develop spatially explicit management policies, such as networks of marine protected areas (MPAs). However, when data are sparse, spatially explicit policies become less viable, and we mus…						15	0	10	15	0027-8424		WOS:000283677400016
PT	AU	BA	CA	GP	RI	BE	Z2	TI	Z1	FT	PN	AE	Z3	SO	SE	BS	VL	IS	SI	MA	BP	EP	AR	DI	D2	SU	PD	PY	AB	Z4	CT	CY	SP	CL	TC	Z8	ZB	Z9	SN	BN	UT
J	Smith, Martin D.; Lynham, John; Sanchirico, James N.; Wilson, James A.							Political economy of marine reserves: Understanding the role of opportunity costs						PROCEEDINGS OF THE NATIONAL ACADEMY OF SCIENCES OF THE UNITED STATES OF AMERICA			107	43			18300	18305		10.1073/pnas.0907365107			OCT 26 2010	2010	The creation of marine reserves is often controversial. For decision-makers, trying to find compromises, an understanding of the timing, magnitude, and incidence of the costs of a reserve is critical. Understanding the costs, in turn, requires consideration of not just the direct financial costs but also the opportunity costs associated with reserves. We use a discrete choice model of commercial …						9	0	6	9	0027-8424		WOS:000283677400017
J	Grorud-Colvert, Kirsten; Lester, Sarah E.; Airame, Satie; Neeley, Elizabeth; Gaines, Steven D.							Communicating marine reserve science to diverse audiences						PROCEEDINGS OF THE NATIONAL ACADEMY OF SCIENCES OF THE UNITED STATES OF AMERICA			107	43			18306	18311		10.1073/pnas.0914292107			OCT 26 2010	2010	As human impacts cause ecosystem-wide changes in the oceans, the need to protect and restore marine resources has led to increasing calls for and establishment of marine reserves. Scientific information about marine reserves has multiplied over the last decade, providing useful knowledge about this tool for resource users, managers, policy makers, and the general public. This information must be …						2	0	2	2	0027-8424		WOS:000283677400018
J	Halpern, Benjamin S.; Lester, Sarah E.; McLeod, Karen L.							Placing marine protected areas onto the ecosystem-based management seascape						PROCEEDINGS OF THE NATIONAL ACADEMY OF SCIENCES OF THE UNITED STATES OF AMERICA			107	43			18312	18317		10.1073/pnas.0908503107			OCT 26 2010	2010	The rapid increase in the science and implementation of marine protected areas (MPAs) around the world in the past 15 years is now being followed by similar increases in the science and application of marine ecosystem-based management (EBM). Despite important overlaps and some common goals, these two approaches have remained either separated in the literature and in conservation and management ef…						12	0	9	12	0027-8424		WOS:000283677400019
J	Yamazaki, Satoshi; Grafton, R. Quentin; Kompas, Tom							Non-consumptive values and optimal marine reserve switching						ECOLOGICAL ECONOMICS			69	12			2427	2434		10.1016/j.ecolecon.2010.07.011			OCT 15 2010	2010	A bioeconomic model is constructed to analyze spatial harvesting and the effects of marine reserve "switching" between a "no-take" area and a harvested area while accounting for both harvesting/consumptive and also non-consumptive values of the fishery. Using estimated parameters from the red throat emperor fishery from the Great Barrier Reef, simulations show that an optimal switching strategy c…						1	0	1	1	0921-8009		WOS:000283700900015
J	del Pilar Moreno-Sanchez, Rocio; Higinio Maldonado, Jorge				Gaechter, Simon/C-9787-2009			Evaluating the role of co-management in improving governance of marine protected areas: An experimental approach in the Colombian Caribbean						ECOLOGICAL ECONOMICS			69	12			2557	2567		10.1016/j.ecolecon.2010.07.032			OCT 15 2010	2010	Complexities associated with the management of common pool resources (CPRs) threaten governance at some marine protected areas (MPAs). In this paper, using economic experimental games (EEGs), we investigate the effects of internal communication, external regulation, and the interaction between internal regulation and non-coercive authority intervention-what we call co-management-on fishermen's ex…						7	0	4	7	0921-8009		WOS:000283700900028
J	Nordlund, Lina; Erlandsson, Johan; de la Torre-Castro, Maricela; Jiddawi, Narriman							Changes in an East African social-ecological seagrass system: invertebrate harvesting affecting species composition and local livelihood						AQUATIC LIVING RESOURCES			23	4			399	416		10.1051/alr/2011006			OCT-DEC 2010	2010	Seagrass meadows support high biodiversity and are important for invertebrate harvesting activities in developing countries. The aim of this study was to estimate the social and ecological effects of invertebrate harvesting, i.e. how this exploitation may affect/has affected seagrass variables (biomass, shoot density and canopy height), macrofaunal community structure, the use and importance of t…						1	0	1	1	0990-7440		WOS:000286975000007
J	Mascia, Michael B.; Claus, C. Anne; Naidoo, Robin							Impacts of Marine Protected Areas on Fishing Communities						CONSERVATION BIOLOGY			24	5			1424	1429		10.1111/j.1523-1739.2010.01523.x			2012-10-10	2010	Marine protected areas (MPAs) are a popular conservation strategy, but their impacts on human welfare are poorly understood. To inform future research and policy decisions, we reviewed the scientific literature to assess MPA impacts on five indicators of human welfare: food security, resource rights, employment, community organization, and income. Following MPA establishment, food security genera…						11	0	6	11	0888-8892		WOS:000282183500030
J	Kellner, Julie B.; Litvin, Steven Y.; Hastings, Alan; Micheli, Fiorenza; Mumby, Peter J.				Mumby, Peter/F-9914-2010			Disentangling trophic interactions inside a Caribbean marine reserve						ECOLOGICAL APPLICATIONS			20	7			1979	1992		10.1890/09-1217.1			2012-10-10	2010	Recent empirical studies have demonstrated that human activities such as fishing can strongly affect the natural capital and services provided by tropical seascapes. However, policies to mitigate anthropogenic impacts can also alter food web structure and interactions, regardless of whether the regulations are aimed at single or multiple species, with possible unexpected consequences for the ecos…						2	0	1	2	1051-0761		WOS:000282278200017
J	Marshall, Dustin J.; Heppell, Selina S.; Munch, Stephan B.; Warner, Robert R.				Marshall, Dustin/A-4185-2008			The relationship between maternal phenotype and offspring quality: Do older mothers really produce the best offspring?						ECOLOGY			91	10			2862	2873		10.1890/09-0156.1			2012-10-10	2010	Maternal effects are increasingly recognized as important drivers of population dynamics and determinants of evolutionary trajectories. Recently, there has been a proliferation of studies finding or citing a positive relationship between maternal size/age and offspring size or offspring quality. The relationship between maternal phenotype and offspring size is intriguing in that it is unclear why…						18	0	18	18	1958-12-01		WOS:000282654700006
J	Mason, Tom J.; Lowe, Christopher G.							Home range, habitat use, and site fidelity of barred sand bass within a southern California marine protected area						FISHERIES RESEARCH			106	1			93	101		10.1016/j.fishres.2010.07.008			2012-10-10	2010	Barred sand bass (Paralabrax nebulifer) is an important recreational species in southern California, which may benefit from marine protected areas. Understanding species movement patterns is a key component to identifying if a species will benefit from marine protected areas. Acoustic telemetry methods coupled with a GIS were used to quantify the home range, site fidelity, and habitat use of barr…						2	1	3	4	0165-7836		WOS:000283458200014
J	Edgar, Graham J.; Banks, Stuart A.; Brandt, Margarita; Bustamante, Rodrigo H.; Chiriboga, Angel; Earle, Sylvia A.; Garske, Lauren E.; Glynn, Peter W.; Grove, Jack S.; Henderson, Scott; Hickman, Cleve P.; Miller, Kathy A.; Rivera, Fernando; Wellington, Gerald M.							El Nino, grazers and fisheries interact to greatly elevate extinction risk for Galapagos marine species						GLOBAL CHANGE BIOLOGY			16	10			2876	2890		10.1111/j.1365-2486.2009.02117.x			2012-10-10	2010	Comparisons between historical and recent ecological datasets indicate that shallow reef habitats across the central Galapagos Archipelago underwent major transformation at the time of the severe 1982/1983 El Nino warming event. Heavily grazed reefs with crustose coralline algae ('urchin barrens') replaced former macroalgal and coral habitats, resulting in large local and regional declines in bio…						5	0	5	5	1354-1013		WOS:000281676700020
J	Harper, Sarah J. M.; Bates, C. Richard; Guzman, Hector M.; Mair, James M.							Acoustic mapping of fish aggregation areas to improve fisheries management in Las Perlas Archipelago, Pacific Panama						OCEAN & COASTAL MANAGEMENT			53	10			615	623		10.1016/j.ocecoaman.2010.07.001			2012-10-10	2010	The purpose of this study was to investigate characterize and map areas of the seabed of Las Perlas Archipelago (LPA) Republic of Panama using swath-bathymetry acoustic sonar techniques and to assess these methods as tools for feeding information into management zoning policy In 2007 the LPA was granted conservation protection under national legislation However detailed management plans are still…						2	0	2	2	0964-5691		WOS:000284437600002
J	Parsons, Darren M.; Morrison, Mark A.; Slater, Matthew J.							Responses to marine reserves: Decreased dispersion of the sparid Pagrus auratus (snapper)						BIOLOGICAL CONSERVATION			143	9			2039	2048		10.1016/j.biocon.2010.05.009			2012-09-10	2010	Quantifying the movement of exploited species inside marine reserves is a popular research topic, yet few studies have quantified movement inside and outside of reserves. If individuals inside reserves behave differently to those outside, this information should be incorporated into reserve design and in management efforts to avoid the selective removal of certain behaviors. We used acoustic tele…						8	0	7	8	2012-06-07		WOS:000281125400013
J	Libralato, Simone; Coll, Marta; Tempesta, Milena; Santojanni, Alberto; Spoto, Maurizio; Palomera, Isabel; Arneri, Enrico; Solidoro, Cosimo				solidoro, cosimo/A-3997-2009			Food-web traits of protected and exploited areas of the Adriatic Sea						BIOLOGICAL CONSERVATION			143	9			2182	2194		10.1016/j.biocon.2010.06.002			2012-09-10	2010	This study presents a comparative analysis of protected and exploited Mediterranean Sea food webs using standardized ecological models of two ecosystems: the Central-North Adriatic Sea (highly exploited) and the Miramare Natural Marine Reserve (Northern Adriatic Sea, protected since 1986). Food webs are analysed in terms of structural and functional traits including trophic levels, transfer effic…						9	0	8	9	2012-06-07		WOS:000281125400029
J	Yorio, Pablo; Quintana, Flavio; Dell'Arciprete, Patricia; Gonzalez-Zevallos, Diego							Spatial overlap between foraging seabirds and trawl fisheries: implications for the effectiveness of a marine protected area at Golfo San Jorge, Argentina						BIRD CONSERVATION INTERNATIONAL			20	3			320	334		10.1017/S0959270910000286			2012-09-10	2010	Assessing human activities and understanding their interaction with seabirds constitute important steps in the development of adequate conservation planning schemes. We evaluated the spatial use of the marine environment by foraging Magellanic Penguins Spheniscus magellanicus and Imperial Cormorants Phalacrocorax atriceps breeding at a newly designated marine park in Golfo San Jorge, Argentina, t…						4	0	3	4	0959-2709		WOS:000283286600009
J	Beger, Maria; Linke, Simon; Watts, Matt; Game, Eddie; Treml, Eric; Ball, Ian; Possingham, Hugh P.				Linke, Simon/G-5440-2010; Possingham, Hugh/B-1337-2008			Incorporating asymmetric connectivity into spatial decision making for conservation						CONSERVATION LETTERS			3	5			359	368		10.1111/j.1755-263X.2010.00123.x			2012-09-10	2010	Real patterns of ecological connectivity are seldom explicitly or systematically accounted for systematic conservation planning, in part because commonly used decision support systems can only capture simplistic notions of connectivity. Conventionally, the surrogates used to represent connectivity in conservation plans have assumed the connection between two sites to be symmetric in strength. In …						6	0	4	6	1755-263X		WOS:000282696000009
J	Almany, G. R.; Hamilton, R. J.; Williamson, D. H.; Evans, R. D.; Jones, G. P.; Matawai, M.; Potuku, T.; Rhodes, K. L.; Russ, G. R.; Sawynok, B.				jones, geoffrey/E-9306-2010			Research partnerships with local communities: two case studies from Papua New Guinea and Australia						CORAL REEFS			29	3			567	576		10.1007/s00338-010-0624-3			2012-09-10	2010	Partnerships between scientists and local communities can increase research capacity and data delivery while improving management effectiveness through enhanced community participation. To encourage such collaboration, this study demonstrates how these partnerships can be formed, drawing on two case studies in coral reef ecosystems in very different social settings (Papua New Guinea and Australia…						4	0	4	4	0722-4028		WOS:000280225200003
J	Anabieza, Mario; Pajaro, Marivic; Reyes, Gonzalo; Tiburcio, Fernando; Watts, Paul							Philippine Alliance of Fisherfolk: Ecohealth Practitioners for Livelihood and Food Security						ECOHEALTH			7	3			394	399		10.1007/s10393-010-0334-x			2012-09-10	2010	Pamana Ka Sa Pilipinas (Pamana) is a grassroots fisherfolk alliance of Philippine Marine Protected Areas with more than 6,000 individual fisherfolk and their 30,000 family members. Access to food, education, and health services for Philippine fisherfolk families is directly dependant upon the fish harvest and related health of the marine environment. Pamana represents a unique "ecohealth" strateg…						0	0	0	0	1612-9202		WOS:000289685500014
J	Godoy, Natalio; Gelcich, Stefan; Vasquez, Julio A.; Carlos Castilla, Juan							Spearfishing to depletion: evidence from temperate reef fishes in Chile						ECOLOGICAL APPLICATIONS			20	6			1504	1511		10.1890/09-1806.1			2012-09-10	2010	Unreliable and data-poor marine fishery landings can lead to a lack of regulatory action in fisheries management. Here we use official Chilean landing reports and non-conventional indicators, such as fishers' perceptions and spearfishing competition results, to provide evidence of reef fishes depletions caused by unregulated spearfishing. Results show that the three largest and most emblematic re…						5	0	4	5	1051-0761		WOS:000281278500003
J	White, J. Wilson; Botsford, Louis W.; Moffitt, Elizabeth A.; Fischer, Douglas T.				Fischer, Douglas/A-3022-2008			Decision analysis for designing marine protected areas for multiple species with uncertain fishery status						ECOLOGICAL APPLICATIONS			20	6			1523	1541		10.1890/09-0962.1			2012-09-10	2010	Marine protected areas (MPAs) are growing in popularity as a conservation tool, and there are increasing calls for additional MPAs. Meta-analyses indicate that most MPAs successfully meet the minimal goal of increasing biomass inside the MPA, while some do not, leaving open the important question of what makes MPAs successful. An often-overlooked aspect of this problem is that the success of fish…						11	0	7	11	1051-0761		WOS:000281278500005
J	Matsuda, Hiroyuki; Makino, Mitsutaku; Tomiyama, Minoru; Gelcich, Stefan; Carlos Castilla, Juan							Fishery management in Japan						ECOLOGICAL RESEARCH			25	5	SI		899	907		10.1007/s11284-010-0748-5			2012-09-10	2010	There are few legal marine protected areas in Japan rather than fishing-ban areas. Fishers did not seek legal fishing-ban areas but they did establish fishing-ban areas by autonomous bases. We briefly introduce the institutional history and features of Japanese coastal fishery management, including the past decade's major legislative developments. Japan still has a decentralized co-management sys…						0	0	0	0	0912-3814		WOS:000284430800003
J	Shears, Nick T.; Ross, Philip M.							Toxic cascades: multiple anthropogenic stressors have complex and unanticipated interactive effects on temperate reefs						ECOLOGY LETTERS			13	9			1149	1159		10.1111/j.1461-0248.2010.01512.x			2012-09-10	2010	In a changing environment multiple anthropogenic stressors can have novel and non-additive effects on interacting species. We investigated the interactive effects of fishing and harmful algal blooms on the predator-sea urchin-macroalgae trophic cascade. Fishing of urchin predators had indirect negative effects on macroalgae, whereas blooms of epi-benthic dinoflagellates (Ostreopsis siamensis) wer…						9	0	7	9	1461-023X		WOS:000281134800009
J	Murchie, Karen J.; Schwager, Emily; Cooke, Steven J.; Danylchuk, Andy J.; Danylchuk, Sascha E.; Goldberg, Tony L.; Suski, Cory D.; Philipp, David P.				Cooke, Steven/F-4193-2010			Spatial ecology of juvenile lemon sharks (Negaprion brevirostris) in tidal creeks and coastal waters of Eleuthera, The Bahamas						ENVIRONMENTAL BIOLOGY OF FISHES			89	1			95	104		10.1007/s10641-010-9693-y			2012-09-10	2010	Fisheries exploitation and habitat alteration are threatening lemon shark (Negaprion bevirostris) populations because they use nearshore regions as nursery sites. As such, there is a need for information on the spatial ecology of juvenile lemon sharks to identify critical habitats that require protection, as well as to understand their basic ecology. The purpose of this study was to determine the…						2	0	2	2	0378-1909		WOS:000280781200010
J	Flaaten, Ola; Mjolhus, Einar							Nature Reserves as a Bioeconomic Management Tool: A Simplified Modelling Approach						ENVIRONMENTAL & RESOURCE ECONOMICS			47	1			125	148					2012-09-10	2010	This paper demonstrates analytically how a nature reserve may protect the total population, realize maximum sustainable yield (MSY) and economic yield (EY) and how this depends on biological growth, migration, reserve size and economic parameters. The pre-reserve population is assumed to follow the logistic growth law and two post-reserve growth models are discussed to explore the importance of m…						3	0	1	3	0924-6460		CCC:000281086800007
J	Klein, Carissa Joy; Steinback, Charles; Watts, Matthew; Scholz, Astrid J.; Possingham, Hugh P.				Possingham, Hugh/B-1337-2008; Klein, Carissa/F-1632-2011			Spatial marine zoning for fisheries and conservation						FRONTIERS IN ECOLOGY AND THE ENVIRONMENT			8	7			349	353		10.1890/090047			2012-09-10	2010	Protected areas are an effective tool for reducing biodiversity loss. Current legislation distinguishes various types of marine protected areas, each allowing different levels of resource extraction. However, almost all of the theory for spatial conservation planning is focused on identifying no-take reserves. The current approaches to zoning for multiple types of protected areas could result in …						10	0	6	10	1540-9295		WOS:000281675800017
J	Ghosh, Mini							MODELING PREY-PREDATOR TYPE FISHERY WITH RESERVE AREA						INTERNATIONAL JOURNAL OF BIOMATHEMATICS			3	3			351	365		10.1142/S1793524510000982			2012-09-10	2010	This paper presents a prey-predator type fishery model in two patch environment. We assume that one patch is accessible to both prey and predator while other is a refuge for prey. The prey refuge constitutes a reserve zone where fishing is not allowed. In the unreserved area there are both prey and predators and harvesting of only predators is permitted. The equilibria of the model and their stab…						0	0	0	0	1793-5245		WOS:000284314700005
J	Teske, P. R.; Forget, F. R. G.; Cowley, P. D.; von der Heyden, S.; Beheregaray, L. B.				Beheregaray, Luciano/A-8621-2008			Connectivity between marine reserves and exploited areas in the philopatric reef fish Chrysoblephus laticeps (Teleostei: Sparidae)						MARINE BIOLOGY			157	9			2029	2042		10.1007/s00227-010-1471-z			2012-09-10	2010	'No-take' marine protected areas (MPAs) are successful in protecting populations of many exploited fish species, but it is often unclear whether networks of MPAs are adequately spaced to ensure connectivity among reserves, and whether there is spillover into adjacent exploited areas. Such issues are particularly important in species with low dispersal potential, many of which exist as genetically…						3	0	3	3	0025-3162		WOS:000281012700012
J	Ban, Natalie C.; Alidina, Hussein M.; Ardron, Jeff A.				Ban, Natalie/C-6938-2009			Cumulative impact mapping: Advances, relevance and limitations to marine management and conservation, using Canada's Pacific waters as a case study						MARINE POLICY			34	5			876	886					2012-09-10	2010	Analysis of cumulative human impacts in the marine environment is still in its infancy but developing rapidly. In this study, existing approaches were expanded upon, aiming for a realistic consideration of cumulative impacts at a regional scale. Thirty-eight human activities were considered, with each broken down according to stressor types and a range of spatial influences. To add to the policy …						10	0	4	10	0308-597X		CCC:000279029700008
J	Hamel, Melanie A.; Andrefouet, Serge				Hamel, Melanie/B-8409-2009			Using very high resolution remote sensing for the management of coral reef fisheries: Review and perspectives						MARINE POLLUTION BULLETIN			60	9			1397	1405		10.1016/j.marpolbul.2010.07.002			2012-09-10	2010	Coral reef fisheries are critical for food security and as a source of income in developing and developed countries, but they are collapsing in many areas. Following the emergence and routine availability of commercial very high spatial resolution (0.6-10 m) multispectral satellite images, we reviewed the use of these new high-quality remote sensing data and products for coral reef fisheries mana…						2	1	2	5	0025-326X		WOS:000282075500013
J	Beare, Doug; Hoelker, Franz; Engelhard, Georg H.; McKenzie, Eddie; Reid, David G.				Beare, Doug/F-8299-2010; Holker, Franz/A-5683-2009			An unintended experiment in fisheries science: a marine area protected by war results in Mexican waves in fish numbers-at-age						NATURWISSENSCHAFTEN			97	9			797	808		10.1007/s00114-010-0696-5			2012-09-10	2010	Marine protected areas (MPAs) are attaining increasing importance in the management of marine ecosystems. They are effective for conservation in tropical and subtropical areas (mainly coral and rocky reefs), but it is debated whether they are useful in the management of migratory fish stocks in open temperate regions. World War II created a large marine area within which commercial fishing was pr…						5	0	3	5	0028-1042		WOS:000281393700002
J	Arceo, Patricia; Granados-Barba, Alejandro							Evaluating sustainability criteria for a marine protected area in Veracruz, Mexico						OCEAN & COASTAL MANAGEMENT			53	9			535	543		10.1016/j.ocecoaman.2010.06.005			2012-09-10	2010	Marine protected areas are designed to protect natural resources within their limits. The National Park Veracruz Reef System was declared a protected area in 1992, however in the ensuing 17 years only limited measures have been taken to reduce harvesting within the area. This study was conducted as a base line to evaluate the sustainability of the park area in the present open access regime. Indi…						1	0	0	1	0964-5691		WOS:000283018800005
J	Pichegru, L.; Gremillet, D.; Crawford, R. J. M.; Ryan, P. G.							Marine no-take zone rapidly benefits endangered penguin						BIOLOGY LETTERS			6	4			498	501		10.1098/rsbl.2009.0913			AUG 23 2010	2010	No-take zones may protect populations of targeted marine species and restore the integrity of marine ecosystems, but it is unclear whether they benefit top predators that rely on mobile pelagic fishes. In South Africa, foraging effort of breeding African penguins decreased by 30 per cent within three months of closing a 20 km zone to the competing purse-seine fisheries around their largest colony…						14	0	13	15	1744-9561		WOS:000279725700016
J	Diamond, Sandra L.; Kleisner, Kristin M.; Duursma, Daisy Englert; Wang, Yuning							Designing marine reserves to reduce bycatch of mobile species: a case study using juvenile red snapper (Lutjanus campechanus)						CANADIAN JOURNAL OF FISHERIES AND AQUATIC SCIENCES			67	8			1335	1349		10.1139/F10-044			2012-08-10	2010	Marine reserves have not been widely used to conserve mobile species because species abundance levels can be highly variable over space and time. Here we explore the potential for marine reserves to reduce bycatch of mobile species using red snapper (Lutjanus campechanus) as a case study. Bycatch in Gulf of Mexico shrimp trawls is a major source of juvenile red snapper mortality, and marine reser…						1	0	1	1	0706-652X		WOS:000281208400011
J	Haisfield, Kelly M.; Fox, Helen E.; Yen, Sheen; Mangubhai, Sangeeta; Mous, Peter J.							An ounce of prevention: cost-effectiveness of coral reef rehabilitation relative to enforcement						CONSERVATION LETTERS			3	4			243	250		10.1111/j.1755-263X.2010.00104.x			2012-08-10	2010	Blast fishing has destroyed many coral reefs in Southeast Asia by creating large fields of dead coral rubble where new coral recruits settle but cannot survive and grow. Possible management responses include reef rehabilitation of damaged areas, and/or increased enforcement to protect still-living ones. Here we show that in Komodo National Park, Indonesia, rehabilitation by installing locally-qua…						3	0	0	3	1755-263X		WOS:000280630500005
J	Little, L. R.; Grafton, R. Q.; Kompas, T.; Smith, A. D. M.				Kompas, Tom/F-5930-2010; Little, Rich/E-7578-2011; Smith, Tony/A-4017-2012			Closure strategies as a tool for fisheries management in metapopulations subjected to catastrophic events						FISHERIES MANAGEMENT AND ECOLOGY			17	4			346	355		10.1111/j.1365-2400.2010.00731.x			2012-08-10	2010	P>Spatial management measures in the form of no-take areas used in fisheries management can provide a buffer against catastrophic events. Dynamic area closures, like rotational closures, have also been used as a management tool particularly for sessile organisms. In this study, bioeconomic models are developed to investigate dynamic closure strategies for use as a management tool in the harvest o…						2	0	1	2	0969-997X		WOS:000279837800004
J	Rudershausen, P. J.; Mitchell, W. A.; Buckel, J. A.; Williams, E. H.; Hazen, E.							Developing a two-step fishery-independent design to estimate the relative abundance of deepwater reef fish: Application to a marine protected area off the southeastern United States coast						FISHERIES RESEARCH			105	3			254	260		10.1016/j.fishres.2010.05.005			AUG-SEP 2010	2010	Reliable data on reef fishes inhabiting the southeastern United States (North Carolina to Florida) continental shelf large marine ecosystem are difficult to obtain; catch quotas and time and area closures limit the collection of fishery-dependent samples. Further, unbiased fishery-independent samples are expensive to collect with conventional fishing gear. Consequently, stock assessments are ofte…						0	0	0	0	0165-7836		WOS:000281181500016
J	Katsanevakis, Stelios; Issaris, Yiannis; Poursanidis, Dimitris; Thessalou-Legaki, Maria							Vulnerability of marine habitats to the invasive green alga Caulerpa racemosa var. cylindracea within a marine protected area						MARINE ENVIRONMENTAL RESEARCH			70	2			210	218		10.1016/j.marenvres.2010.05.003			2012-08-10	2010	The relative vulnerability of various habitat types to Caulerpa racemosa var. cylindracea invasion was investigated in the National Marine Park of Zakynthos (Ionian Sea, Greece). The density of C. racemosa fronds was modelled with generalized additive models for location, scale and shape (GAMLSS), based on an information theory approach. The species was present in as much as 33% of 748 randomly p…						5	0	5	5	0141-1136		WOS:000280046400010
J	Chen, Chung-Ling							Diversifying fisheries into tourism in Taiwan: Experiences and prospects						OCEAN & COASTAL MANAGEMENT			53	8			487	492		10.1016/j.ocecoaman.2010.06.003			2012-08-10	2010	Tourism is accepted as natural part of the socioeconomic fabric and is juxtaposed with fisheries in some coastal areas in Taiwan. This is the result of governmental policy on diversifying fisheries into tourism. This paper examines how this policy plays out in the context of a declining offshore fisheries industry and a rising demand for marine leisure opportunities. The paper utilizes documentar…						1	0	0	1	0964-5691		WOS:000281348600009
J	Gardiner, Kathleen; Dick, Terry A.							Arctic cephalopod distributions and their associated predators						POLAR RESEARCH			29	2			209	227		10.1111/j.1751-8369.2010.00146.x			2012-08-10	2010	Cephalopods are key species of the eastern Arctic marine food web, both as prey and predator. Their presence in the diets of Arctic fish, birds and mammals illustrates their trophic importance. There has been considerable research on cephalopods (primarily Gonatus fabricii) from the north Atlantic and the west side of Greenland, where they are considered a potential fishery and are taken as a by-…						0	0	0	0	0800-0395		WOS:000280127700006
J	Scales, Helen							Advances in the ecology, biogeography and conservation of seahorses (genus Hippocampus)						PROGRESS IN PHYSICAL GEOGRAPHY			34	4			443	458		10.1177/0309133310364928			2012-08-10	2010	Seahorses (genus Hippocampus) form a group of over 30 species of enigmatic and charismatic marine fish that are attracting increasing global concern for their threatened status. Particular issues include the overexploitation of seahorses in target and bycatch fisheries and their utilization for traditional Chinese medicines. Seahorses are also thought to be highly vulnerable to habitat loss and d…						4	0	4	4	0309-1333		WOS:000280199700002
J	Andalecio, Merlina N.							Multi-criteria decision models for management of tropical coastal fisheries. A review						AGRONOMY FOR SUSTAINABLE DEVELOPMENT			30	3			557	580		10.1051/agro/2009051			JUL-SEP 2010	2010	The crisis in the world's fisheries is attributed to excessive fishing pressure, long-term mismanagement, increased population growth, development and improvement of fishing technologies, uncertainty in global fisheries catch data, economic incentives and subsidies, and increasing demand for fish meal. For the coastal fisheries of developing countries, the problem is aggravated by coastal habitat…						2	0	1	2	1774-0746		WOS:000281616000004
[truncated: 1,709 more rows]

## Sheet: Red Sea
PT	AU	BA	CA	GP	RI	BE	Z2	TI	Z1	FT	PN	AE	Z3	SO	SE	BS	VL	IS	SI	MA	BP	EP	AR	DI	D2	SU	PD	PY	AB	Z4	CT	CY	SP	CL	TC	Z8	ZB	Z9	SN	BN	UT
[truncated: 17 more rows]

## Sheet: removed from Red Sea
REASON FOR EXCLUSION	AU	BA	CA	GP	BE	Z2	TI	Z1	FT	PN	AE	Z3	SO	SE	BS	VL	IS	SI	MA	BP	EP	AR	DI	D2	SU	PD	PY	AB	Z4	CT	CY	SP	CL	TC	Z8	ZB	Z9	SN	BN	UT		Removal Reason
[truncated: 41 more rows]

[truncated: 4 more sheets: without Aqaba, removed Aqaba, GBR, Caribbean]
